# Supplementary material
Source: publisher figshare collection journal article supplement (https://gsapubs.figshare.com/articles/dataset/_/23060891)
Supplement: Supplementary file 1 [file 1]

## Sheet: Northern India Cry to Edia
U-Pb ages of detrital zircons from Cryogenian to Ediacaran siliciclastic rocks from Northern India
				Ratio						Age
Sample	Th (ppm)	U (ppm)	Th/U	207Pb/206Pb	1σ	207Pb/235U	1σ	206Pb/238U	1σ	207Pb/206Pb	1σ	207Pb/235U	1σ	206Pb/238U	1σ		References
LHW19 ( Cryogenian Blaini Formation)																	(Wang et al., 2020)
LHW19-01			0.33	0.069	0.0009	1.391	0.0165	0.1467	0.0009	884	26	884	7	882	5		(Wang et al., 2020)
LHW19-02			0.61	0.0665	0.0007	1.343	0.015	0.1467	0.0008	813	23	863	7	882	4		(Wang et al., 2020)
LHW19-03			0.9	0.0671	0.0009	1.355	0.019	0.1467	0.0008	825	29	868	8	882	5		(Wang et al., 2020)
LHW19-04			0.6	0.1592	0.0008	10.06	0.06	0.4598	0.0023	2445	8	2440	6	2438	10		(Wang et al., 2020)
LHW19-05			1.13	0.0709	0.0019	1.459	0.0435	0.1496	0.0014	950	50	908	17	898	8		(Wang et al., 2020)
LHW19-06			1.01	0.0663	0.0009	1.179	0.0145	0.1294	0.0009	812	26	792	6	784	5		(Wang et al., 2020)
LHW19-07			1.11	0.1049	0.001	4.337	0.0395	0.3006	0.0023	1708	17	1699	8	1694	11		(Wang et al., 2020)
LHW19-08			0.8	0.0666	0.0007	1.237	0.012	0.1345	0.0006	827	22	817	6	814	3		(Wang et al., 2020)
LHW19-09			0.62	0.0725	0.0006	1.604	0.0125	0.1606	0.0007	995	16	971	5	960	4		(Wang et al., 2020)
LHW19-10			1.43	0.1109	0.0007	4.935	0.032	0.3234	0.0016	1810	11	1807	6	1806	8		(Wang et al., 2020)
LHW19-11			0.7	0.106	0.0009	4.532	0.04	0.3106	0.0016	1727	16	1735	8	1743	8		(Wang et al., 2020)
LHW19-12			0.78	0.0997	0.0004	3.814	0.0215	0.2777	0.001	1617	8	1595	5	1580	5		(Wang et al., 2020)
LHW19-13			0.81	0.07	0.0012	1.132	0.0155	0.1192	0.0018	917	36	768	8	726	11		(Wang et al., 2020)
LHW19-14			0.82	0.108	0.0009	4.518	0.0425	0.3033	0.0014	1769	16	1740	9	1708	7		(Wang et al., 2020)
LHW19-15			0.79	0.1553	0.0006	9.41	0.055	0.4403	0.002	2404	7	2378	5	2351	9		(Wang et al., 2020)
LHW19-16			0.55	0.0697	0.0016	1.329	0.0295	0.1391	0.0014	875	48	854	13	839	8		(Wang et al., 2020)
LHW19-17			0.25	0.0678	0.0008	1.301	0.0155	0.1396	0.0008	849	25	845	7	842	4		(Wang et al., 2020)
LHW19-18			0.47	0.1422	0.0029	6.69	0.175	0.3359	0.002	2247	37	2058	22	1867	10		(Wang et al., 2020)
LHW19-19			1.68	0.0728	0.0008	1.527	0.016	0.1525	0.0009	1000	21	940	7	915	5		(Wang et al., 2020)
LHW19-20			0.52	0.0685	0.0012	1.321	0.021	0.1405	0.0011	859	36	852	9	847	6		(Wang et al., 2020)
LHW19-21			0.34	0.1026	0.0008	3.716	0.0325	0.2609	0.0014	1676	16	1574	7	1501	7		(Wang et al., 2020)
LHW19-22			0.69	0.0684	0.0012	1.371	0.022	0.1468	0.0011	858	34	874	10	883	6		(Wang et al., 2020)
LHW19-23			0.28	0.0701	0.0007	1.381	0.0155	0.1432	0.001	922	19	880	7	863	6		(Wang et al., 2020)
LHW19-24			0.36	0.1141	0.0008	5.216	0.0405	0.3324	0.0019	1863	13	1854	7	1850	9		(Wang et al., 2020)
LHW19-25			0.4	0.1	0.0007	3.871	0.0305	0.2812	0.0015	1621	13	1606	7	1597	8		(Wang et al., 2020)
LHW19-26			0.51	0.1022	0.0011	4.127	0.04	0.2938	0.0018	1657	19	1658	8	1660	9		(Wang et al., 2020)
LHW19-27			0.29	0.1143	0.0009	4.676	0.046	0.2974	0.0025	1864	14	1761	9	1678	12		(Wang et al., 2020)
LHW19-28			0.62	0.1051	0.0007	4.315	0.025	0.2986	0.0014	1713	11	1696	5	1684	7		(Wang et al., 2020)
LHW19-29			0.62	0.0693	0.0008	1.471	0.0175	0.1544	0.0008	895	24	917	7	926	4		(Wang et al., 2020)
LHW19-30			0.14	0.0711	0.001	1.359	0.0175	0.1391	0.0007	944	28	870	8	839	4		(Wang et al., 2020)
LHW19-31			0.78	0.0998	0.0007	3.739	0.0285	0.2715	0.0012	1616	13	1579	6	1548	6		(Wang et al., 2020)
LHW19-32			0.11	0.083	0.0005	2.161	0.0165	0.1886	0.001	1267	12	1168	6	1114	5		(Wang et al., 2020)
LHW19-33			1.4	0.0716	0.0017	1.231	0.0305	0.1246	0.0008	946	44	812	13	757	4		(Wang et al., 2020)
LHW19-34			1.39	0.1001	0.0013	3.7	0.046	0.2703	0.002	1615	23	1569	10	1542	10		(Wang et al., 2020)
LHW19-35			0.97	0.1066	0.0011	3.397	0.0345	0.2327	0.001	1737	19	1503	8	1348	5		(Wang et al., 2020)
LHW19-36			0.99	0.0813	0.0019	1.804	0.0455	0.1607	0.0015	1209	46	1043	17	961	8		(Wang et al., 2020)
LHW19-37			0.9	0.0742	0.0008	1.576	0.017	0.154	0.0009	1039	22	960	7	923	5		(Wang et al., 2020)
LHW19-38			0.96	0.0727	0.0018	1.416	0.0345	0.1437	0.0015	950	55	895	16	865	9		(Wang et al., 2020)
LHW19-39			0.59	0.1126	0.0008	5.089	0.0405	0.3273	0.0017	1839	13	1833	7	1825	9		(Wang et al., 2020)
LHW19-40			0.88	0.1666	0.0007	10.2	0.0485	0.445	0.0017	2522	7	2453	4	2373	8		(Wang et al., 2020)
LHW19-41			0.64	0.1049	0.0007	4.215	0.0315	0.2922	0.0013	1708	13	1676	6	1652	6		(Wang et al., 2020)
LHW19-42			0.44	0.1047	0.0011	4.222	0.0435	0.2935	0.0021	1701	20	1676	9	1658	11		(Wang et al., 2020)
LHW19-43			0.29	0.1131	0.0009	5.1	0.04	0.3265	0.0015	1845	15	1835	7	1821	7		(Wang et al., 2020)
LHW19-44			0.48	0.0782	0.001	2.152	0.028	0.2001	0.001	1139	25	1163	9	1176	5		(Wang et al., 2020)
LHW19-45			0.4	0.121	0.006	4.19	0.255	0.2481	0.0029	1960	85	1668	49	1428	15		(Wang et al., 2020)
LHW19-46			0.44	0.1758	0.0012	11.74	0.085	0.4854	0.0023	2610	11	2582	7	2550	10		(Wang et al., 2020)
LHW19-47			0.5	0.0818	0.0013	2.181	0.034	0.1941	0.0016	1221	32	1171	11	1143	9		(Wang et al., 2020)
LHW19-48			0.52	0.1068	0.001	4.349	0.0345	0.2973	0.0026	1743	16	1702	7	1678	13		(Wang et al., 2020)
LHW19-49			0.06	0.1705	0.0006	11.42	0.075	0.4868	0.0024	2561	6	2557	6	2556	11		(Wang et al., 2020)
LHW19-50			0.54	0.0705	0.0018	1.344	0.0305	0.1408	0.0015	910	50	865	15	849	8		(Wang et al., 2020)
LHW19-51			0.47	0.1532	0.0011	8.95	0.075	0.4249	0.0028	2378	12	2331	8	2282	13		(Wang et al., 2020)
LHW19-52			0.13	0.1144	0.0006	5.332	0.036	0.3388	0.0017	1868	10	1873	6	1880	8		(Wang et al., 2020)
LHW19-53			0.62	0.1658	0.0012	10.9	0.085	0.4779	0.0028	2513	12	2514	8	2518	12		(Wang et al., 2020)
LHW19-54			0.82	0.0996	0.0009	3.862	0.04	0.2808	0.0017	1617	18	1604	9	1595	9		(Wang et al., 2020)
LHW19-55			0.8	0.105	0.0019	3.97	0.135	0.2775	0.0049	1680	33	1619	28	1578	25		(Wang et al., 2020)
LHW19-56			0.34	0.1128	0.001	5.092	0.0445	0.3283	0.0018	1846	15	1833	8	1830	9		(Wang et al., 2020)
LHW19-57			0.8	0.1149	0.0014	4.6	0.065	0.2911	0.0024	1867	22	1745	11	1646	12		(Wang et al., 2020)
LHW19-58			0.53	0.1133	0.0014	4.71	0.055	0.3043	0.002	1844	22	1767	10	1712	10		(Wang et al., 2020)
LHW19-59			0.58	0.113	0.0007	5.095	0.031	0.328	0.0015	1845	12	1834	5	1828	7		(Wang et al., 2020)
LHW19-60			0.62	0.0767	0.0009	2.096	0.0245	0.199	0.0017	1103	22	1146	8	1169	9		(Wang et al., 2020)
LHW19-61			0.38	0.0978	0.0006	3.334	0.0245	0.2476	0.0011	1580	11	1488	6	1426	6		(Wang et al., 2020)
LHW19-62			0.38	0.1065	0.001	3.47	0.0355	0.2371	0.0013	1734	18	1519	8	1371	7		(Wang et al., 2020)
LHW19-63			0.61	0.0715	0.0017	1.147	0.026	0.1169	0.0011	929	48	772	13	712	6		(Wang et al., 2020)
LHW19-64			0.73	0.1649	0.0009	10.54	0.065	0.4651	0.0027	2504	9	2483	6	2461	12		(Wang et al., 2020)
LHW19-65			0.44	0.0802	0.0007	2.243	0.0205	0.2036	0.0011	1195	17	1194	7	1195	6		(Wang et al., 2020)
LHW19-66			0.52	0.1133	0.0009	5.117	0.0415	0.3285	0.0017	1849	14	1837	7	1831	9		(Wang et al., 2020)
LHW19-67			0.4	0.0719	0.0013	1.408	0.023	0.1429	0.0012	958	36	890	10	861	7		(Wang et al., 2020)
LHW19-68			0.65	0.1272	0.0024	6.5	0.125	0.3705	0.0029	2047	33	2041	17	2031	14		(Wang et al., 2020)
LHW19-69			0.41	0.0702	0.0009	1.525	0.0185	0.1576	0.0009	923	25	939	8	943	5		(Wang et al., 2020)
LHW19-70			0.52	0.0897	0.0013	2.72	0.1	0.2193	0.0016	1383	19	1320	20	1278	9		(Wang et al., 2020)
LHW19-71			1.62	0.0678	0.0006	1.296	0.011	0.1391	0.0007	856	19	843	5	840	4		(Wang et al., 2020)
LHW19-72			9.95	0.1394	0.0014	7.84	0.095	0.4092	0.0028	2213	18	2210	11	2210	13		(Wang et al., 2020)
LHW19-73			2.28	0.0673	0.0009	1.246	0.016	0.1349	0.0008	831	28	820	7	815	4		(Wang et al., 2020)
LHW19-74			4.1	0.171	0.0007	11.1	0.06	0.4726	0.0024	2566	7	2531	5	2495	11		(Wang et al., 2020)
LHW19-75			1.48	0.1045	0.0007	4.348	0.0285	0.3023	0.0012	1702	12	1702	6	1703	6		(Wang et al., 2020)
LHW19-76			2.38	0.0861	0.0011	2.619	0.03	0.2226	0.0015	1330	24	1311	9	1295	8		(Wang et al., 2020)
LHW19-77			1.27	0.0684	0.0006	1.297	0.0115	0.1381	0.0006	872	18	844	5	834	4		(Wang et al., 2020)
LHW19-78			1.13	0.0995	0.0006	3.823	0.0215	0.2791	0.0009	1613	11	1597	5	1587	4		(Wang et al., 2020)
LHW19-79			1.31	0.1042	0.0012	4.48	0.055	0.3127	0.0025	1699	23	1725	10	1753	12		(Wang et al., 2020)
LHW19-80			0.68	0.0828	0.001	2.23	0.025	0.1966	0.0009	1262	24	1192	9	1157	5		(Wang et al., 2020)
NBD1-1 ( Cryogenian Blaini Formation)
NBD1-1			1.52	13.94	0.1534	1.655	0.0212	0.1672	0.0011	979	22	991	8	997	6		(McKenzie et al., 2011)
NBD1-2			1.52	9.375	0.1154	4.528	0.0754	0.3079	0.0034	1743	23	1736	14	1730	17		(McKenzie et al., 2011)
NBD1-4			7.12	8.685	0.2128	4.923	0.129	0.3101	0.0029	1882	44	1806	22	1741	14		(McKenzie et al., 2011)
NBD1-5			0.64	14.07	0.1242	1.57	0.0188	0.1602	0.0013	959	18	958	7	958	7		(McKenzie et al., 2011)
NBD1-6			0.95	12.81	0.3538	2.161	0.065	0.2008	0.0024	1148	55	1169	21	1180	13		(McKenzie et al., 2011)
NBD1-8			1.57	12.34	0.1318	2.34	0.057	0.2093	0.0046	1223	21	1224	17	1225	24		(McKenzie et al., 2011)
NBD1-7			1.7	14.22	0.295	1.591	0.0396	0.164	0.0023	938	43	967	16	979	13		(McKenzie et al., 2011)
NBD1-9			1.42	12.74	0.125	2.118	0.0233	0.1957	0.001	1159	19	1155	8	1152	5		(McKenzie et al., 2011)
NBD1-10			1.72	10.77	0.0916	3.263	0.0563	0.2548	0.0038	1485	16	1472	13	1463	20		(McKenzie et al., 2011)
NBD1-11			1.98	7.315	0.0651	7.56	0.1717	0.401	0.0084	2186	15	2180	20	2174	39		(McKenzie et al., 2011)
NBD1-12			2.54	8.652	0.0943	5.465	0.079	0.3429	0.0033	1889	20	1895	12	1901	16		(McKenzie et al., 2011)
NBD1-13			4.66	9.786	0.0626	3.553	0.0845	0.2521	0.0058	1664	12	1539	19	1450	30		(McKenzie et al., 2011)
NBD1-14			2.7	10.47	0.1592	3.594	0.076	0.2729	0.004	1538	29	1548	17	1556	20		(McKenzie et al., 2011)
NBD1-15			1.08	9.617	0.0837	4.264	0.0428	0.2974	0.0015	1696	16	1686	8	1678	7		(McKenzie et al., 2011)
NBD1-16			1.02	12.43	0.1682	2.264	0.0356	0.2041	0.0016	1208	27	1201	11	1197	9		(McKenzie et al., 2011)
NBD1-17			4.9	8.978	0.0853	4.981	0.0552	0.3243	0.0018	1822	17	1816	9	1811	9		(McKenzie et al., 2011)
NBD1-18			1.91	9.067	0.078	4.923	0.0495	0.3237	0.0017	1804	16	1806	8	1808	8		(McKenzie et al., 2011)
NBD1-19			7.23	8.842	0.1512	4.929	0.1493	0.3161	0.0079	1850	31	1807	26	1771	39		(McKenzie et al., 2011)
NBD1-20			1.01	14.87	0.3142	1.327	0.0288	0.1431	0.0007	846	44	858	13	862	4		(McKenzie et al., 2011)
NBD1-21			0.53	14.1	0.3308	1.585	0.038	0.1621	0.0008	954	48	964	15	969	5		(McKenzie et al., 2011)
NBD1-22			1.46	8.995	0.0756	5.006	0.0788	0.3266	0.0043	1819	15	1820	13	1822	21		(McKenzie et al., 2011)
NBD1-23			0.78	15.55	0.2738	1.12	0.0223	0.1263	0.0012	752	37	763	11	767	7		(McKenzie et al., 2011)
NBD1-24			0.47	10.08	0.2107	3.658	0.0786	0.2674	0.0013	1609	39	1562	17	1528	7		(McKenzie et al., 2011)
NBD1-25			0.44	14.54	0.4207	1.489	0.0485	0.157	0.0023	892	60	926	20	940	13		(McKenzie et al., 2011)
NBD1-26			2.83	5.931	0.0391	11.2	0.2562	0.4818	0.0106	2544	11	2540	21	2535	46		(McKenzie et al., 2011)
NBD1-27			1.05	11.18	0.1421	2.538	0.107	0.2058	0.0083	1413	24	1283	31	1207	44		(McKenzie et al., 2011)
NBD1-28			1.66	6.984	0.0622	8.31	0.1296	0.4209	0.0054	2266	15	2265	14	2265	24		(McKenzie et al., 2011)
NBD1-29			2.77	14.51	0.2791	1.44	0.04	0.1516	0.003	896	40	906	17	910	17		(McKenzie et al., 2011)
NBD1-30			3.03	8.625	0.0647	5.401	0.0522	0.3379	0.0021	1895	13	1885	8	1876	10		(McKenzie et al., 2011)
NBD1-31			3.17	8.687	0.0886	5.407	0.0761	0.3406	0.0033	1882	18	1886	12	1890	16		(McKenzie et al., 2011)
NBD1-32			2.04	10.63	0.1339	3.4	0.0775	0.2621	0.005	1510	24	1504	18	1500	25		(McKenzie et al., 2011)
NBD1-33			1.96	5.834	0.0543	11.62	0.2262	0.4916	0.0084	2571	16	2574	18	2578	36		(McKenzie et al., 2011)
NBD1-35			1.81	9.851	0.1025	4.035	0.0856	0.2883	0.0053	1652	19	1641	17	1633	27		(McKenzie et al., 2011)
NBD1-36			2.4	12.42	0.1467	2.304	0.0311	0.2075	0.0013	1210	23	1214	10	1215	7		(McKenzie et al., 2011)
NBD1-37			1.88	14.13	0.205	1.558	0.0394	0.1597	0.0033	951	30	954	16	955	18		(McKenzie et al., 2011)
NBD1-38			1.59	14.29	0.4537	1.411	0.047	0.1462	0.0015	928	65	893	20	879	8		(McKenzie et al., 2011)
NBD1-39			2.19	11.14	0.1871	3.114	0.0606	0.2516	0.0025	1421	32	1436	15	1447	13		(McKenzie et al., 2011)
NBD1-40			1.36	5.902	0.0449	11.3	0.1191	0.4839	0.0035	2552	13	2549	10	2544	15		(McKenzie et al., 2011)
NBD1-41			3.76	6.103	0.0433	10.48	0.1693	0.464	0.0067	2496	12	2479	15	2457	30		(McKenzie et al., 2011)
NBD1-42			3.51	14.85	0.1203	1.289	0.0123	0.1388	0.0007	849	17	841	5	838	4		(McKenzie et al., 2011)
NBD1-43			1.52	6.36	0.0585	8.797	0.1548	0.4057	0.0061	2426	16	2317	16	2195	28		(McKenzie et al., 2011)
NBD1-44			4.24	3.705	0.0823	20.24	1.0138	0.5439	0.0244	3305	35	3103	49	2800	##		(McKenzie et al., 2011)
NBD1-45			4.47	14.95	0.4502	1.321	0.0434	0.1433	0.0019	834	63	855	19	863	11		(McKenzie et al., 2011)
NBD1-46			1.24	9.826	0.0894	4.052	0.0591	0.2887	0.0033	1657	17	1645	12	1635	16		(McKenzie et al., 2011)
NBD1-47			1.82	8.28	0.0696	5.887	0.1116	0.3536	0.006	1968	15	1959	16	1952	29		(McKenzie et al., 2011)
NBD1-48			3.39	10.54	0.0991	3.087	0.0688	0.2359	0.0048	1526	18	1429	17	1366	25		(McKenzie et al., 2011)
NBD1-49			2.42	9.639	0.1071	4.248	0.0688	0.297	0.0035	1692	20	1683	13	1676	17		(McKenzie et al., 2011)
NBD1-50			3.52	8.51	0.0732	5.562	0.0967	0.3433	0.0052	1919	15	1910	15	1903	25		(McKenzie et al., 2011)
NBD1-51			1.99	8.711	0.0993	5.295	0.0888	0.3345	0.0041	1877	21	1868	14	1860	20		(McKenzie et al., 2011)
NBD1-52			1.76	14.75	0.2038	1.294	0.0207	0.1384	0.0011	863	29	843	9	836	6		(McKenzie et al., 2011)
NBD1-53			1.44	14.66	0.1627	1.399	0.0294	0.1487	0.0026	876	23	889	12	894	15		(McKenzie et al., 2011)
NBD1-54			1.34	5.798	0.0423	11.62	0.1672	0.4886	0.0061	2582	12	2574	13	2565	26		(McKenzie et al., 2011)
NBD1-55			5.98	12	0.1392	2.48	0.047	0.2158	0.0032	1278	23	1266	14	1260	17		(McKenzie et al., 2011)
NBD1-56			3.26	14.9	0.1745	1.264	0.0444	0.1366	0.0045	841	24	830	20	825	26		(McKenzie et al., 2011)
NBD1-58			3.06	14.9	0.222	1.281	0.0237	0.1385	0.0015	842	31	837	11	836	9		(McKenzie et al., 2011)
NBD1-57			9.02	14.69	0.2087	1.28	0.0324	0.1364	0.0029	871	29	837	14	824	16		(McKenzie et al., 2011)
NBD1-59			1.05	9.924	0.3801	3.656	0.2353	0.2632	0.0136	1638	71	1562	51	1506	69		(McKenzie et al., 2011)
NBD1-60			2.91	10.06	0.0734	3.815	0.0482	0.2783	0.0029	1613	14	1596	10	1583	14		(McKenzie et al., 2011)
NBD1-61			1.96	13.32	0.2549	1.864	0.0381	0.18	0.0013	1071	38	1068	13	1067	7		(McKenzie et al., 2011)
NBD1-63			2.03	11.34	0.135	2.876	0.0623	0.2366	0.0043	1386	23	1376	16	1369	22		(McKenzie et al., 2011)
NBD1-64			1.99	8.65	0.1877	5.102	0.1232	0.3201	0.0034	1889	39	1836	21	1790	17		(McKenzie et al., 2011)
NBD1-65			6.91	8.865	0.0523	4.764	0.1191	0.3063	0.0074	1845	11	1779	21	1723	37		(McKenzie et al., 2011)
NBD1-66			8.5	8.733	0.0839	5.24	0.1253	0.3319	0.0073	1872	17	1859	20	1847	35		(McKenzie et al., 2011)
NBD1-67			2.73	8.956	0.0448	4.847	0.0812	0.3148	0.005	1827	9	1793	14	1764	25		(McKenzie et al., 2011)
NBD1-68			3.86	8.768	0.0789	5.098	0.1035	0.3242	0.0059	1865	16	1836	17	1810	29		(McKenzie et al., 2011)
NBD1-69			14.1	14.66	0.1819	1.197	0.0431	0.1273	0.0043	875	26	799	20	772	25		(McKenzie et al., 2011)
NBD1-70			2.48	14.59	0.1726	1.311	0.024	0.1387	0.0019	885	24	850	11	837	11		(McKenzie et al., 2011)
NBD1-71			0.98	14.82	0.1291	1.299	0.0231	0.1397	0.0022	852	18	845	10	843	12		(McKenzie et al., 2011)
NBD1-73			3.29	14.46	0.1507	1.434	0.0219	0.1504	0.0017	903	21	903	9	903	9		(McKenzie et al., 2011)
NBD1-74			1.45	8.464	0.2207	5.54	0.193	0.3401	0.0079	1928	47	1907	30	1887	38		(McKenzie et al., 2011)
NBD1-75			2.99	9.082	0.0672	4.866	0.0728	0.3206	0.0042	1801	13	1796	13	1792	20		(McKenzie et al., 2011)
NBD1-76			2.63	8.482	0.0916	5.684	0.1337	0.3497	0.0073	1925	19	1929	20	1933	35		(McKenzie et al., 2011)
NBD1-77			1.88	14.63	0.1832	1.386	0.0255	0.147	0.002	879	26	883	11	884	11		(McKenzie et al., 2011)
NBD1-78			1.52	8.666	0.1421	5.342	0.1138	0.3358	0.0046	1886	30	1876	18	1866	22		(McKenzie et al., 2011)
NBD1-79			1.07	9.857	0.0947	4.074	0.0545	0.2913	0.0027	1651	18	1649	11	1648	14		(McKenzie et al., 2011)
NBD1-80			1.49	10.34	0.0714	3.635	0.0594	0.2726	0.004	1562	13	1557	13	1554	20		(McKenzie et al., 2011)
NBD1-81			2.35	5.802	0.0801	11.53	0.2259	0.4853	0.0067	2581	23	2567	18	2550	29		(McKenzie et al., 2011)
NBD1-82			1.56	9.683	0.183	4.298	0.1221	0.3019	0.0064	1684	35	1693	23	1701	32		(McKenzie et al., 2011)
NBD1-83			9.66	8.771	0.3096	4.94	0.2065	0.3143	0.007	1864	64	1809	35	1762	35		(McKenzie et al., 2011)
NBD1-84			0.75	10.37	0.2471	3.541	0.0887	0.2664	0.0021	1555	45	1536	20	1523	10		(McKenzie et al., 2011)
NBD1-85			1.99	15.12	0.2631	1.272	0.028	0.1395	0.0019	811	36	833	13	842	11		(McKenzie et al., 2011)
NBD1-86			2.03	5.994	0.0522	10.97	0.2163	0.4769	0.0084	2526	15	2521	18	2514	37		(McKenzie et al., 2011)
NBD1-87			2.2	9.775	0.0919	3.274	0.0841	0.2321	0.0055	1666	17	1475	20	1345	29		(McKenzie et al., 2011)
NBD1-88			1.88	10.08	0.1282	3.815	0.0713	0.279	0.0038	1609	24	1596	15	1586	19		(McKenzie et al., 2011)
NBD1-89			2.11	12.82	0.1836	2.103	0.0411	0.1955	0.0026	1147	28	1150	13	1151	14		(McKenzie et al., 2011)
NBD1-90			1.51	8.646	0.0771	5.374	0.0966	0.337	0.0053	1890	16	1881	15	1872	25		(McKenzie et al., 2011)
NBD1-91			3.13	5.781	0.0393	11.75	0.2065	0.4928	0.008	2587	11	2585	16	2583	34		(McKenzie et al., 2011)
NBD1-92			5.41	8.431	0.0742	5.666	0.0932	0.3465	0.0048	1935	16	1926	14	1918	23		(McKenzie et al., 2011)
NBD1-93			1.91	14.73	0.3602	1.393	0.0564	0.1488	0.0048	865	51	886	24	894	27		(McKenzie et al., 2011)
NBD1-94			1.06	5.72	0.0503	11.93	0.2694	0.4949	0.0103	2604	15	2599	21	2592	44		(McKenzie et al., 2011)
NBD1-95			2.29	6.509	0.0859	9.025	0.341	0.426	0.0151	2387	22	2341	35	2288	68		(McKenzie et al., 2011)
NBD1-96			1.71	5.849	0.0468	11.51	0.1689	0.4882	0.006	2567	13	2565	14	2563	26		(McKenzie et al., 2011)
NBD1-97			1.37	8.69	0.0643	5.332	0.0581	0.3361	0.0027	1881	13	1874	9	1868	13		(McKenzie et al., 2011)
NBD1-98			1.07	13.95	0.137	1.632	0.0231	0.1652	0.0017	976	20	983	9	986	9		(McKenzie et al., 2011)
NBD1-99			1.53	9.188	0.091	4.744	0.0685	0.3161	0.0033	1780	18	1775	12	1771	16		(McKenzie et al., 2011)
NBD1-100			2.67	8.409	0.0647	5.702	0.0536	0.3477	0.0019	1940	14	1932	8	1924	9		(McKenzie et al., 2011)
In1-a (Cryogenian Blaini Formation)
In1-a3			1.34	0.0705	0.0008	1.69	0.0254	0.1739	0.0018	943	23	1005	10	1034	10		(Hoffman et al., 2011)
In1-a5			0.89	0.1012	0.001	4.42	0.0729	0.3171	0.0043	1646	18	1717	14	1775	21		(Hoffman et al., 2011)
In1-a6			0.95	0.1637	0.0012	10.93	0.1421	0.4841	0.0053	2494	13	2517	13	2545	23		(Hoffman et al., 2011)
In1-a7			0.97	0.1127	0.0006	5.33	0.0666	0.343	0.0038	1843	10	1874	11	1901	18		(Hoffman et al., 2011)
In1-a8			0.31	0.1138	0.0006	5.56	0.0639	0.3546	0.0037	1861	9	1911	10	1957	18		(Hoffman et al., 2011)
In1-a9			0.62	0.1064	0.0009	4.71	0.0612	0.3213	0.0032	1738	15	1769	11	1796	16		(Hoffman et al., 2011)
In1-a10			1.14	0.105	0.002	4.52	0.0994	0.3118	0.0031	1715	36	1734	19	1750	16		(Hoffman et al., 2011)
In1-a11			1.11	0.0656	0.0008	1.19	0.0202	0.1315	0.0016	794	24	796	10	796	9		(Hoffman et al., 2011)
In1-a13			1.01	0.0686	0.0005	1.43	0.0186	0.1509	0.0017	885	15	900	8	906	10		(Hoffman et al., 2011)
In1-a15			0.54	0.0801	0.0007	2.3	0.0391	0.2086	0.0031	1200	17	1214	12	1222	17		(Hoffman et al., 2011)
In1-a16			1.47	0.0698	0.0014	1.56	0.0382	0.1617	0.0023	923	41	953	16	966	13		(Hoffman et al., 2011)
In1-a17			1.17	0.0809	0.001	2.36	0.0425	0.212	0.0028	1219	24	1232	13	1239	15		(Hoffman et al., 2011)
In1-a18			0.98	0.0858	0.0023	2.88	0.0835	0.2438	0.0028	1333	52	1378	23	1406	15		(Hoffman et al., 2011)
In1-a19			0.84	0.1161	0.001	5.79	0.0782	0.3617	0.0038	1896	16	1945	12	1990	18		(Hoffman et al., 2011)
In1-a20			1.4	0.0826	0.0014	2.69	0.0538	0.2361	0.0026	1259	32	1325	15	1366	14		(Hoffman et al., 2011)
In1-a22			1.61	0.1137	0.0008	5.5	0.066	0.3505	0.0035	1860	13	1900	11	1937	17		(Hoffman et al., 2011)
In1-a24			0.18	0.1118	0.0006	4.92	0.0664	0.3192	0.004	1829	10	1806	12	1786	20		(Hoffman et al., 2011)
In1-a25			0.99	0.1154	0.001	5.12	0.0947	0.3218	0.0051	1886	17	1839	16	1799	25		(Hoffman et al., 2011)
In1-a26			0.23	0.1262	0.0006	6.75	0.081	0.3877	0.0045	2046	8	2079	11	2112	21		(Hoffman et al., 2011)
In1-a27			0.61	0.1103	0.0007	5.25	0.0709	0.3453	0.004	1804	12	1861	12	1912	20		(Hoffman et al., 2011)
In1-a28			1.34	0.0693	0.0014	1.44	0.0374	0.1503	0.0024	908	42	904	16	903	14		(Hoffman et al., 2011)
In1-a29			0.37	0.1105	0.0007	5.35	0.0642	0.3511	0.0037	1808	11	1877	11	1940	18		(Hoffman et al., 2011)
In1-a31			0.41	0.0695	0.0009	1.54	0.0262	0.1608	0.0019	915	26	947	11	961	11		(Hoffman et al., 2011)
In1-a33			0.98	0.1061	0.0008	4.62	0.0624	0.3156	0.0036	1733	14	1752	12	1768	18		(Hoffman et al., 2011)
In1-a35			1.23	0.0654	0.001	1.16	0.022	0.129	0.0014	786	32	783	11	782	9		(Hoffman et al., 2011)
In1-a36			1.23	0.0972	0.0009	3.8	0.0608	0.2834	0.0037	1571	17	1593	13	1609	19		(Hoffman et al., 2011)
In1-a37			0.76	0.0992	0.0009	4.07	0.0631	0.2976	0.0036	1610	18	1649	13	1679	18		(Hoffman et al., 2011)
In1-a38			1.07	0.0723	0.001	1.61	0.0306	0.1611	0.002	994	29	972	12	963	12		(Hoffman et al., 2011)
In1-a39			2.56	0.0861	0.0008	2.56	0.0397	0.2158	0.0027	1340	18	1290	12	1260	15		(Hoffman et al., 2011)
In1-a40			1.07	0.0819	0.0007	2.53	0.0367	0.2242	0.0026	1243	17	1281	11	1304	14		(Hoffman et al., 2011)
In1-a41			0.59	0.07	0.0011	1.52	0.0304	0.157	0.002	930	33	937	13	940	11		(Hoffman et al., 2011)
In1-a42			1.23	0.0729	0.0011	1.78	0.032	0.1771	0.0017	1010	31	1038	12	1051	10		(Hoffman et al., 2011)
In1-a44			1.32	0.0939	0.0008	3.76	0.0508	0.2902	0.003	1506	17	1583	11	1642	15		(Hoffman et al., 2011)
In1-a46			0.86	0.1676	0.0013	10.9	0.169	0.4716	0.0061	2534	14	2515	15	2491	27		(Hoffman et al., 2011)
In1-a48			1.04	0.1691	0.0011	12.42	0.1677	0.5327	0.0064	2549	11	2637	13	2753	27		(Hoffman et al., 2011)
In1-a49			0.62	0.0693	0.0009	1.45	0.0239	0.1518	0.0017	907	26	910	10	911	10		(Hoffman et al., 2011)
In1-a50			0.91	0.0994	0.001	4.17	0.0605	0.3041	0.0033	1613	19	1668	12	1712	17		(Hoffman et al., 2011)
In1-a52			1.51	0.0736	0.0008	1.86	0.0279	0.1836	0.0019	1030	21	1068	10	1087	11		(Hoffman et al., 2011)
In1-a54			0.37	0.1128	0.0006	5.57	0.0641	0.3581	0.0038	1845	9	1912	10	1973	18		(Hoffman et al., 2011)
In1-a55			1.41	0.0675	0.0021	1.33	0.0446	0.1425	0.0017	853	65	857	20	859	10		(Hoffman et al., 2011)
In1-a57			0.96	0.1158	0.001	5.61	0.0785	0.3516	0.0039	1892	16	1918	12	1942	18		(Hoffman et al., 2011)
In1-a58			0.99	0.108	0.0008	4.95	0.0644	0.3327	0.0035	1766	14	1811	11	1851	18		(Hoffman et al., 2011)
In1-a59			0.75	0.07	0.002	1.39	0.0445	0.1443	0.0019	929	60	886	20	869	11		(Hoffman et al., 2011)
In1-a60			0.88	0.1148	0.0009	5.74	0.0746	0.3623	0.0036	1877	15	1937	12	1993	18		(Hoffman et al., 2011)
In1-a61			0.9	0.0704	0.0005	1.61	0.0225	0.1659	0.0019	939	16	974	9	989	11		(Hoffman et al., 2011)
In1-a62			0.32	0.0697	0.0007	1.49	0.0209	0.1548	0.0016	921	19	926	9	928	9		(Hoffman et al., 2011)
In1-a63			0.57	0.0936	0.0009	3.15	0.0488	0.2437	0.0028	1500	19	1444	12	1406	15		(Hoffman et al., 2011)
In1-a64			1.08	0.1131	0.0008	5.51	0.0744	0.3533	0.0041	1850	13	1902	12	1950	20		(Hoffman et al., 2011)
In1-a65			0.7	0.1138	0.001	5.5	0.088	0.3504	0.0047	1862	15	1901	14	1936	23		(Hoffman et al., 2011)
In1-a66			1.06	0.0982	0.0008	4.03	0.0564	0.2973	0.0033	1591	16	1640	12	1678	17		(Hoffman et al., 2011)
In1-2a2			1.43	0.1139	0.002	5.47	0.1149	0	0.53	1863	32	1897	18	1927	19		(Hoffman et al., 2011)
In1-2a3			0.31	0.1135	0.0006	5.47	0.052	0	0.86	1855	9	1896	9	1933	14		(Hoffman et al., 2011)
In1-2a4			0.58	0.0984	0.0006	3.96	0.0376	0	0.78	1594	12	1626	8	1651	11		(Hoffman et al., 2011)
In1-2a5			0.59	0.1357	0.0007	7.34	0.0844	0	0.87	2173	10	2154	11	2133	18		(Hoffman et al., 2011)
In1-2a6			0.82	0.0862	0.0008	2.65	0.0596	0	0.91	1343	18	1315	17	1298	25		(Hoffman et al., 2011)
In1-2a7			0.82	0.1143	0.0006	5.54	0.0554	0	0.88	1869	9	1906	9	1941	15		(Hoffman et al., 2011)
In1-2a8			0.67	0.113	0.0008	5.08	0.0686	0	0.83	1849	14	1832	12	1817	18		(Hoffman et al., 2011)
In1-2a9			0.77	0.1139	0.0011	5.25	0.0814	0	0.8	1863	17	1860	14	1858	20		(Hoffman et al., 2011)
In1-2a10			1.91	0.1574	0.0017	10.34	0.1551	0	0.68	2428	19	2466	14	2511	21		(Hoffman et al., 2011)
In1-2a11			0.92	0.148	0.0029	8.9	0.2092	0	0.57	2323	33	2328	22	2334	26		(Hoffman et al., 2011)
In1-2a14			0.76	0.1117	0.0008	4.88	0.0732	0	0.86	1828	14	1799	13	1774	21		(Hoffman et al., 2011)
In1-2a15			0.67	0.1067	0.0009	4.71	0.0636	0	0.77	1744	16	1769	12	1790	16		(Hoffman et al., 2011)
In1-2a16			0.87	0.1147	0.0008	5.54	0.0637	0	0.78	1875	13	1907	10	1935	15		(Hoffman et al., 2011)
In1-2a17			1.17	0.0725	0.0007	1.62	0.0203	0	0.68	1001	19	979	8	969	8		(Hoffman et al., 2011)
In1-2a18			0.93	0.0821	0.001	2.51	0.0377	0	0.59	1249	24	1274	11	1290	11		(Hoffman et al., 2011)
In1-2a19			0.93	0.0821	0.001	2.51	0.0377	0	0.59	1249	24	1274	11	1290	11		(Hoffman et al., 2011)
In1-2a20			0.56	0.0679	0.0009	1.35	0.023	0	0.6	867	29	868	10	868	9		(Hoffman et al., 2011)
In1-2a21			1.06	0.0677	0.0011	1.37	0.026	0	0.53	859	34	874	12	880	9		(Hoffman et al., 2011)
In1-2a22			1.33	0.102	0.0009	4.12	0.0515	0	0.72	1661	16	1658	11	1656	13		(Hoffman et al., 2011)
In1-2a24			0.64	0.1141	0.0006	5.63	0.0563	0	0.87	1867	9	1921	9	1971	15		(Hoffman et al., 2011)
In1-2a27			1.22	0.0719	0.0008	1.64	0.0238	0	0.62	983	23	987	10	989	9		(Hoffman et al., 2011)
In1-2a29			0.46	0.1193	0.0017	5.87	0.0998	0	0.49	1946	26	1957	15	1968	14		(Hoffman et al., 2011)
In1-2a30			0.31	0.1141	0.0006	5.19	0.0545	0	0.84	1866	11	1852	9	1839	14		(Hoffman et al., 2011)
In1-2a31			1.05	0.1019	0.0009	4.01	0.0481	0	0.69	1659	16	1637	10	1619	12		(Hoffman et al., 2011)
In1-2a32			0.49	0.1112	0.001	5.01	0.0752	0	0.8	1820	17	1821	13	1821	19		(Hoffman et al., 2011)
In1-2a33			0.55	0.0709	0.0015	1.54	0.0362	0	0.48	956	42	948	15	945	10		(Hoffman et al., 2011)
In1-2a35			1.46	0.1028	0.0013	4.25	0.0638	0	0.52	1676	24	1683	13	1689	12		(Hoffman et al., 2011)
In1-2a36			0.36	0.0696	0.0009	1.51	0.0242	0	0.54	916	28	933	10	940	8		(Hoffman et al., 2011)
In1-2a37			0.99	0.0971	0.0011	4.05	0.0567	0	0.62	1568	21	1644	12	1703	14		(Hoffman et al., 2011)
In1-2a38			0.77	0.0875	0.0008	2.76	0.0428	0	0.82	1373	17	1345	12	1328	15		(Hoffman et al., 2011)
In1-2a39			0.82	0.108	0.0006	4.92	0.0615	0	0.86	1766	12	1805	11	1839	17		(Hoffman et al., 2011)
In1-2a40			0.38	0.1131	0.0007	5.39	0.0728	0	0.9	1849	11	1883	12	1914	20		(Hoffman et al., 2011)
In1-2a41			0.5	0.0847	0.0007	2.8	0.0322	0	0.72	1309	15	1355	9	1384	10		(Hoffman et al., 2011)
In1-2a42			0.76	0.1145	0.0007	5.56	0.0528	0	0.78	1873	11	1910	9	1945	13		(Hoffman et al., 2011)
In1-2a46			0.26	0.1143	0.0009	5.54	0.0554	0	0.7	1868	13	1907	9	1942	12		(Hoffman et al., 2011)
In1-2a47			0.36	0.0677	0.0006	1.44	0.0166	0	0.68	859	18	908	7	928	7		(Hoffman et al., 2011)
In1-2a48			1.36	0.0796	0.0013	2.32	0.0441	0	0.56	1187	31	1220	14	1238	12		(Hoffman et al., 2011)
In1-2a49			0.61	0.1132	0.0008	5.41	0.0622	0	0.8	1851	13	1886	10	1919	15		(Hoffman et al., 2011)
In1-2a50			1.34	0.1155	0.0008	5.43	0.0652	0	0.85	1887	12	1890	11	1892	17		(Hoffman et al., 2011)
In1-2a51			0.81	0.0965	0.0008	3.5	0.0455	0	0.77	1558	15	1526	10	1503	14		(Hoffman et al., 2011)
In1-2a55			0.46	0.108	0.0009	4.85	0.0631	0	0.8	1766	14	1793	11	1817	17		(Hoffman et al., 2011)
In1-2a58			1.16	0.0831	0.0012	2.37	0.0415	0	0.51	1272	30	1232	13	1210	10		(Hoffman et al., 2011)
In1-2a59			0.67	0.1121	0.0008	4.58	0.0573	0	0.82	1834	13	1745	11	1672	15		(Hoffman et al., 2011)
In1-2a60			0.7	0.1145	0.0009	5.68	0.0625	0	0.73	1872	14	1928	10	1982	14		(Hoffman et al., 2011)
In1-2a61			0.94	0.0675	0.0009	1.35	0.0216	0	0.55	853	28	868	10	874	7		(Hoffman et al., 2011)
In1-2a62			0.59	0.1581	0.0012	10.24	0.1434	0	0.84	2435	13	2456	13	2482	24		(Hoffman et al., 2011)
In1-2a64			1.68	0.1102	0.0026	4.92	0.1279	0	0.37	1803	44	1805	23	1807	15		(Hoffman et al., 2011)
In1-2a65			3.11	0.0729	0.0012	1.58	0.0292	0	0.54	1012	32	963	12	941	9		(Hoffman et al., 2011)
In1-2a66			0.51	0.0693	0.001	1.41	0.0247	0	0.54	908	30	893	11	886	8		(Hoffman et al., 2011)
In1-3a2			0.59	0.0693	0.0009	1.42	0.0234	0.149	0.0015	907	28	898	10	895	9		(Hoffman et al., 2011)
In1-3a3			0.49	0.1141	0.0011	5.26	0.0789	0.3343	0.004	1865	17	1862	13	1859	19		(Hoffman et al., 2011)
In1-3a4			1.2	0.0725	0.0012	1.66	0.0324	0.1659	0.0019	1000	32	993	13	990	11		(Hoffman et al., 2011)
In1-3a5			0.81	0.1608	0.001	10.4	0.1508	0.4691	0.0061	2465	11	2471	14	2480	27		(Hoffman et al., 2011)
In1-3a7			1.66	0.0792	0.0008	2.25	0.0315	0.2057	0.002	1177	21	1196	10	1206	11		(Hoffman et al., 2011)
In1-3a9			0.57	0.1155	0.0009	5.44	0.068	0.3414	0.0034	1888	14	1891	11	1893	16		(Hoffman et al., 2011)
In1-3a10			1.04	0.0801	0.001	2.3	0.0357	0.2086	0.0021	1200	23	1214	11	1222	12		(Hoffman et al., 2011)
In1-3a13			0.26	0.1075	0.0009	4.71	0.0636	0.3176	0.0033	1758	15	1769	12	1778	17		(Hoffman et al., 2011)
In1-3a14			2.82	0.0691	0.0009	1.48	0.0215	0.1555	0.0011	901	26	923	9	932	6		(Hoffman et al., 2011)
In33-a1			1.13	0.0984	0.0014	4	0.066	0.2946	0.0024	1593	28	1633	14	1665	12		(Hoffman et al., 2011)
In33-a2			1.27	0.0919	0.0008	3.17	0.038	0.2498	0.0021	1466	17	1449	10	1437	11		(Hoffman et al., 2011)
In33-a3			1.07	0.0674	0.0008	1.44	0.0223	0.1554	0.0015	850	26	907	10	931	8		(Hoffman et al., 2011)
In33-a4			0.77	0.0978	0.0007	3.68	0.0386	0.2726	0.0022	1584	13	1567	9	1554	11		(Hoffman et al., 2011)
In33-a5			1.16	0.163	0.0011	10.94	0.1258	0.4868	0.0046	2487	12	2518	11	2557	20		(Hoffman et al., 2011)
In33-a6			1.24	0.0719	0.001	1.64	0.0312	0.1652	0.002	982	30	985	12	986	11		(Hoffman et al., 2011)
In33-a8			0.92	0.158	0.0013	9.08	0.109	0.417	0.0038	2435	14	2347	11	2247	17		(Hoffman et al., 2011)
In33-a9			1.18	0.0791	0.0008	2.36	0.0319	0.2161	0.0019	1176	21	1230	10	1261	11		(Hoffman et al., 2011)
In33-a10			0.82	0.0823	0.0008	2.63	0.0355	0.2319	0.0023	1252	19	1309	10	1344	12		(Hoffman et al., 2011)
In33-a11			1.2	0.0925	0.0011	3.35	0.0553	0.2624	0.0029	1478	23	1492	13	1502	15		(Hoffman et al., 2011)
In33-a12			1.24	0.0648	0.0008	1.11	0.0189	0.1247	0.0014	769	27	761	9	758	8		(Hoffman et al., 2011)
In33-a13			0.66	0.1105	0.0007	4.95	0.0495	0.3247	0.0026	1807	12	1810	9	1813	13		(Hoffman et al., 2011)
In33-a14			1.32	0.0679	0.0007	1.4	0.0203	0.1494	0.0014	864	23	888	9	898	8		(Hoffman et al., 2011)
In33-a15			1.04	0.0619	0.0008	0.95	0.0143	0.1109	0.0008	670	28	676	8	678	5		(Hoffman et al., 2011)
In33-a16			0.69	0.0978	0.0013	4.06	0.0629	0.3012	0.0026	1582	24	1646	13	1697	13		(Hoffman et al., 2011)
In33-a17			0.96	0.0668	0.001	1.29	0.0239	0.1404	0.0015	831	32	843	11	847	9		(Hoffman et al., 2011)
In33-a18			0.78	0.1068	0.0009	4.66	0.0489	0.3161	0.0022	1746	15	1759	9	1771	11		(Hoffman et al., 2011)
In33-a20			0.78	0.1975	0.001	14.87	0.1413	0.5461	0.0044	2806	8	2807	9	2809	19		(Hoffman et al., 2011)
In33-a22			1.09	0.1025	0.0008	4.19	0.0587	0.2965	0.0036	1670	14	1672	12	1674	18		(Hoffman et al., 2011)
In33-a23			1.64	0.1625	0.0018	10.37	0.14	0.4626	0.0037	2482	19	2468	13	2451	17		(Hoffman et al., 2011)
In33-a24			1.17	0.1006	0.0011	4.25	0.0531	0.3062	0.0021	1636	20	1683	11	1722	11		(Hoffman et al., 2011)
In33-a25			0.68	0.0712	0.0007	1.61	0.0209	0.1636	0.0014	963	21	973	8	977	8		(Hoffman et al., 2011)
In33-a26			0.77	0.1137	0.0013	5.48	0.074	0.3497	0.0026	1860	21	1898	12	1933	12		(Hoffman et al., 2011)
In33-a27			0.69	0.1046	0.0006	4.36	0.0523	0.302	0.0032	1707	11	1704	10	1701	16		(Hoffman et al., 2011)
In33-a28			0.7	0.099	0.0007	3.66	0.0531	0.2685	0.0032	1605	14	1564	12	1533	17		(Hoffman et al., 2011)
In33-a29			1.22	0.0998	0.0009	4.28	0.0599	0.3112	0.0031	1621	17	1690	12	1747	16		(Hoffman et al., 2011)
In33-a30			0.2	0.0729	0.001	1.74	0.0305	0.1736	0.0018	1010	29	1025	12	1032	10		(Hoffman et al., 2011)
In33-a32			1.34	0.079	0.0008	2.05	0.0277	0.188	0.0016	1172	21	1131	9	1110	9		(Hoffman et al., 2011)
In33-a34			0.77	0.1033	0.0011	4.58	0.0573	0.3215	0.0023	1685	19	1746	11	1797	11		(Hoffman et al., 2011)
In33-a35			0.86	0.0666	0.0007	1.25	0.0181	0.1363	0.0012	824	24	824	8	823	7		(Hoffman et al., 2011)
In33-a36			1.9	0.0674	0.0011	1.3	0.0254	0.1398	0.0013	849	36	845	12	843	8		(Hoffman et al., 2011)
In33-a37			1.59	0.0662	0.0014	1.24	0.0285	0.1361	0.0014	813	44	820	13	823	8		(Hoffman et al., 2011)
In33-a38			0.9	0.1052	0.0012	4.22	0.0633	0.2909	0.0026	1717	22	1678	13	1646	14		(Hoffman et al., 2011)
In33-a39			0.65	0.0659	0.0009	1.19	0.0226	0.1311	0.0017	804	29	797	11	794	10		(Hoffman et al., 2011)
In33-a40			0.48	0.162	0.001	10.61	0.1114	0.475	0.004	2476	10	2489	10	2505	18		(Hoffman et al., 2011)
In33-a41			1.74	0.0657	0.0009	1.13	0.0186	0.1247	0.0011	796	30	767	9	758	6		(Hoffman et al., 2011)
In33-a43			0.87	0.1129	0.0008	5.24	0.0603	0.3368	0.0029	1847	14	1860	10	1871	14		(Hoffman et al., 2011)
In33-a44			0.54	0.0669	0.0009	1.28	0.0218	0.139	0.0014	833	29	837	10	839	8		(Hoffman et al., 2011)
In33-a45			0.56	0.1101	0.0009	5.26	0.0684	0.3467	0.0035	1801	15	1863	11	1919	17		(Hoffman et al., 2011)
In33-a46			1.26	0.1008	0.0013	4.09	0.0654	0.2943	0.0029	1639	24	1652	14	1663	15		(Hoffman et al., 2011)
In33-a47			1.36	0.0662	0.0011	1.16	0.0226	0.1267	0.0014	813	34	780	11	769	8		(Hoffman et al., 2011)
In33-a48			1.32	0.0697	0.002	1.49	0.0432	0.1546	0.0014	920	57	925	18	927	8		(Hoffman et al., 2011)
In33-a49			0.64	0.0677	0.0007	1.37	0.0171	0.1469	0.0011	859	22	877	8	884	6		(Hoffman et al., 2011)
In33-a50			2.54	0.0666	0.0018	1.21	0.0369	0.132	0.0018	824	56	806	17	799	11		(Hoffman et al., 2011)
In33-a53			1.46	0.0668	0.001	1.26	0.0221	0.1362	0.0012	832	31	826	10	823	7		(Hoffman et al., 2011)
In33-a54			1.28	0.071	0.0011	1.56	0.0304	0.1597	0.0019	956	31	955	12	955	11		(Hoffman et al., 2011)
In33-a56			0.87	0.0734	0.0006	1.75	0.0219	0.1729	0.0016	1025	16	1027	8	1028	9		(Hoffman et al., 2011)
In33-a57			0.99	0.0947	0.0012	3.3	0.0528	0.2525	0.0023	1522	24	1480	13	1451	12		(Hoffman et al., 2011)
In33-a58			1.43	0.0805	0.0008	2.31	0.0312	0.2084	0.0019	1210	20	1217	10	1220	10		(Hoffman et al., 2011)
In33-a60			1.1	0.0949	0.0006	3.23	0.0388	0.2466	0.0025	1526	11	1464	9	1421	13		(Hoffman et al., 2011)
In33-2a2			0.41	0.0813	0.0009	2.35	0.0388	0.21	0.0026	1228	22	1229	12	1229	14		(Hoffman et al., 2011)
In33-2a4			0.65	0.1138	0.0009	5.3	0.0742	0.3381	0.0039	1860	15	1869	12	1877	19		(Hoffman et al., 2011)
In33-2a5			1.3	0.1513	0.0019	9.47	0.1563	0.4539	0.005	2360	21	2384	16	2412	23		(Hoffman et al., 2011)
In33-2a6			1.02	0.0678	0.0009	1.34	0.0248	0.1434	0.0019	863	28	864	11	864	11		(Hoffman et al., 2011)
In33-2a7			0.48	0.1033	0.0007	4.27	0.0576	0.3001	0.0036	1684	13	1688	12	1692	18		(Hoffman et al., 2011)
In33-2a9			1.09	0.1059	0.0012	4.42	0.0707	0.3025	0.0035	1729	21	1715	14	1704	17		(Hoffman et al., 2011)
In33-2a10			0.56	0.1126	0.001	5.32	0.0745	0.3426	0.0038	1842	17	1872	13	1899	18		(Hoffman et al., 2011)
In33-2a12			1.04	0.0698	0.0013	1.54	0.0347	0.1597	0.002	922	39	945	14	955	11		(Hoffman et al., 2011)
In33-2a13			0.8	0.0666	0.001	1.28	0.025	0.1391	0.0018	826	30	836	11	840	10		(Hoffman et al., 2011)
In33-2a14			0.94	0.067	0.0012	1.28	0.0288	0.1387	0.0019	837	36	837	13	837	11		(Hoffman et al., 2011)
In33-2a16			0.63	0.0642	0.0015	1.09	0.0289	0.1229	0.0015	749	50	748	14	747	9		(Hoffman et al., 2011)
In33-2a18			0.83	0.071	0.0006	1.58	0.0205	0.1616	0.0016	957	17	963	8	966	9		(Hoffman et al., 2011)
In33-2a19			0.94	0.0985	0.0011	3.87	0.0639	0.2847	0.0033	1596	22	1607	14	1615	17		(Hoffman et al., 2011)
In33-2a20			0.65	0.0663	0.0007	1.26	0.0183	0.1377	0.0012	815	23	827	8	831	7		(Hoffman et al., 2011)
In33-2a21			0.77	0.0964	0.003	3.45	0.1225	0.2593	0.0045	1555	58	1515	29	1486	24		(Hoffman et al., 2011)
In33-2a23			0.85	0.1132	0.0011	5.19	0.0753	0.3323	0.0035	1851	18	1850	13	1850	18		(Hoffman et al., 2011)
In33-2a24			1.28	0.112	0.001	5.09	0.0789	0.3293	0.0043	1833	16	1834	14	1835	21		(Hoffman et al., 2011)
In33-2a26			0.93	0.0849	0.0014	2.67	0.0521	0.2282	0.0022	1312	34	1320	15	1325	11		(Hoffman et al., 2011)
In33-2a27			0.81	0.1864	0.0013	13.44	0.1613	0.5232	0.005	2710	12	2711	12	2713	21		(Hoffman et al., 2011)
In33-2a28			0.63	0.1092	0.001	4.83	0.0652	0.3209	0.0032	1786	17	1790	12	1794	16		(Hoffman et al., 2011)
In33-2a30			1.19	0.1144	0.0009	5.38	0.0673	0.3408	0.0032	1871	15	1881	11	1891	16		(Hoffman et al., 2011)
In33-2a31			0.71	0.0688	0.0009	1.39	0.025	0.1463	0.0019	893	27	884	11	880	11		(Hoffman et al., 2011)
In33-2a32			0.92	0.0683	0.0009	1.43	0.025	0.1516	0.0017	877	29	900	11	910	10		(Hoffman et al., 2011)
In33-2a34			1.26	0.0975	0.0012	3.78	0.0662	0.2808	0.0034	1577	24	1588	14	1596	17		(Hoffman et al., 2011)
In33-2a35			0.99	0.0681	0.001	1.3	0.0234	0.1387	0.0015	871	29	846	11	837	9		(Hoffman et al., 2011)
In33-2a37			0.38	0.0718	0.0009	1.62	0.0284	0.1639	0.0019	981	27	979	11	979	11		(Hoffman et al., 2011)
In33-2a38			0.7	0.067	0.0009	1.31	0.0236	0.1413	0.0016	839	29	849	11	852	9		(Hoffman et al., 2011)
In33-2a39			0.73	0.105	0.0007	4.52	0.0588	0.3123	0.0034	1714	13	1735	11	1752	18		(Hoffman et al., 2011)
In33-2a40			0.81	0.1124	0.0014	5.45	0.0872	0.3513	0.0035	1839	23	1892	14	1941	17		(Hoffman et al., 2011)
In33-2a41			1.65	0.0952	0.0016	3.72	0.0688	0.2833	0.0025	1533	31	1576	15	1608	13		(Hoffman et al., 2011)
In33-2a42			1.33	0.1623	0.0013	10.39	0.1662	0.4644	0.0065	2480	13	2470	15	2459	29		(Hoffman et al., 2011)
In33-2a44			1.52	0.0991	0.0011	5.74	0.0947	0.4201	0.0053	1608	21	1938	15	2261	24		(Hoffman et al., 2011)
In33-2a45			1.23	0.1054	0.0014	4.32	0.0821	0.2975	0.0042	1721	24	1697	16	1679	21		(Hoffman et al., 2011)
In33-2a47			0.85	0.1252	0.0008	6.52	0.0782	0.3774	0.004	2032	11	2048	11	2064	19		(Hoffman et al., 2011)
In33-2a48			1.03	0.0788	0.0009	2.13	0.0394	0.1958	0.0028	1168	24	1158	13	1153	15		(Hoffman et al., 2011)
In33-2a50			0.89	0.0678	0.0011	1.36	0.0272	0.1457	0.0017	863	34	873	12	877	10		(Hoffman et al., 2011)
In33-2a51			0.43	0.0766	0.0007	2.06	0.0278	0.1953	0.002	1110	18	1136	9	1150	11		(Hoffman et al., 2011)
In33-2a54			1.08	0.0858	0.0011	2.83	0.0481	0.2393	0.0028	1334	25	1364	13	1383	14		(Hoffman et al., 2011)
In33-2a55			0.33	0.1109	0.0012	4.98	0.0797	0.3256	0.0036	1815	20	1816	14	1817	18		(Hoffman et al., 2011)
In33-2a57			0.52	0.1615	0.0009	11.63	0.1512	0.522	0.006	2472	10	2575	12	2708	26		(Hoffman et al., 2011)
In33-2a58			0.91	0.1049	0.0008	4.41	0.0595	0.3047	0.0032	1712	15	1713	11	1715	16		(Hoffman et al., 2011)
In33-2a59			2.05	0.0654	0.0011	1.19	0.0256	0.1316	0.0016	789	37	795	12	797	10		(Hoffman et al., 2011)
LHW02 (Cryogenian Blaini)
LHW02-01			0.37	0.0669	0.0006	1.232	0.013	0.1346	0.0009	827	20	814	6	814	5		(Wang et al., 2020)
LHW02-02			0.3	0.0665	0.0007	1.245	0.011	0.1364	0.0008	813	21	823	5	824	4		(Wang et al., 2020)
LHW02-03			0.08	0.0688	0.0007	1.369	0.0135	0.1451	0.0008	883	21	875	6	873	4		(Wang et al., 2020)
LHW02-04			0.08	0.0662	0.0006	1.253	0.011	0.1383	0.0009	805	19	824	5	835	5		(Wang et al., 2020)
LHW02-05			0.29	0.0695	0.0008	1.276	0.0135	0.1338	0.0007	903	23	836	7	809	4		(Wang et al., 2020)
LHW02-06			0.5	0.0695	0.0006	1.377	0.0115	0.1443	0.0006	920	16	878	5	869	3		(Wang et al., 2020)
LHW02-07			0.5	0.0659	0.0008	1.16	0.013	0.1286	0.0008	791	25	781	6	780	4		(Wang et al., 2020)
LHW02-08			0.13	0.099	0.0125	2.3	0.55	0.153	0.006	1270	115	1020	60	915	32		(Wang et al., 2020)
LHW02-09			0.89	0.0697	0.0012	1.259	0.021	0.1328	0.0009	896	33	828	10	804	5		(Wang et al., 2020)
LHW02-10			0.45	0.0695	0.001	1.337	0.018	0.1418	0.0011	895	30	860	8	855	6		(Wang et al., 2020)
LHW02-11			0.87	0.0672	0.0007	1.277	0.014	0.1386	0.0008	834	22	834	6	837	4		(Wang et al., 2020)
LHW02-12			0.55	0.0653	0.0007	1.239	0.0135	0.1386	0.0011	774	21	817	6	839	7		(Wang et al., 2020)
LHW02-13			1.28	0.0672	0.0008	1.186	0.0125	0.1286	0.0007	842	24	795	6	780	4		(Wang et al., 2020)
LHW02-14			0.45	0.0693	0.0014	1.386	0.0255	0.1468	0.0012	891	39	879	11	883	7		(Wang et al., 2020)
LHW02-15			0.52	0.0674	0.0006	1.195	0.0105	0.129	0.0009	841	19	799	5	782	5		(Wang et al., 2020)
LHW02-16			1.49	0.09	0.0095	1.98	0.37	0.1431	0.0044	1120	95	950	55	860	24		(Wang et al., 2020)
LHW02-17			0.57	0.0675	0.001	1.311	0.02	0.1413	0.0008	832	32	848	9	852	4		(Wang et al., 2020)
LHW02-18			0.92	0.0675	0.0012	1.284	0.0195	0.1386	0.0009	827	37	836	9	836	5		(Wang et al., 2020)
LHW02-19			0.45	0.0681	0.0006	1.352	0.0115	0.1439	0.0006	870	18	868	5	867	3		(Wang et al., 2020)
LHW02-20			0.99	0.0679	0.0008	1.319	0.0155	0.1421	0.0007	850	26	853	7	856	4		(Wang et al., 2020)
LHW02-21			0.9	0.0676	0.0009	1.286	0.0155	0.1394	0.0009	840	27	841	8	841	5		(Wang et al., 2020)
LHW02-22			4.39	0.1056	0.0011	4.427	0.0495	0.3051	0.0017	1716	19	1715	9	1716	8		(Wang et al., 2020)
LHW02-23			1.06	0.0688	0.001	1.256	0.0155	0.1334	0.0008	887	27	824	7	807	4		(Wang et al., 2020)
LHW02-24			1.54	0.0653	0.0011	1.14	0.02	0.1279	0.0012	760	35	773	10	776	7		(Wang et al., 2020)
LHW02-25			0.82	0.0697	0.0013	1.402	0.025	0.1474	0.001	887	40	886	11	886	6		(Wang et al., 2020)
LHW02-26			1.06	0.1134	0.0006	5.09	0.03	0.3283	0.0018	1851	10	1834	5	1830	9		(Wang et al., 2020)
LHW02-27			0.88	0.0692	0.0015	1.351	0.032	0.1425	0.0012	867	42	862	14	859	7		(Wang et al., 2020)
LHW02-28			0.84	0.0997	0.0006	3.87	0.0205	0.2826	0.0011	1616	11	1607	4	1605	6		(Wang et al., 2020)
LHW02-29			0.8	0.0668	0.0011	1.219	0.02	0.132	0.001	808	34	807	9	799	6		(Wang et al., 2020)
LHW02-30			1.12	0.0752	0.0021	1.33	0.033	0.1312	0.0012	1030	55	864	15	794	7		(Wang et al., 2020)
LHW02-31			0.56	0.0658	0.0012	1.227	0.021	0.1361	0.0008	770	39	810	10	822	5		(Wang et al., 2020)
LHW02-32			0.83	0.1004	0.0006	3.904	0.0275	0.2831	0.0012	1628	11	1613	6	1607	6		(Wang et al., 2020)
LHW02-33			2.42	0.0662	0.0029	1.053	0.0455	0.1182	0.0016	670	90	722	24	720	9		(Wang et al., 2020)
LHW02-34			0.93	0.0734	0.0008	1.729	0.0185	0.1723	0.0008	1023	21	1018	7	1025	4		(Wang et al., 2020)
LHW02-35			0.7	0.0675	0.001	1.279	0.0185	0.1384	0.0009	835	30	834	9	836	5		(Wang et al., 2020)
LHW02-36			0.4	0.0667	0.0005	1.309	0.01	0.1429	0.0007	829	17	849	4	861	4		(Wang et al., 2020)
LHW02-37			0.95	0.167	0.0009	10.42	0.06	0.4557	0.0021	2529	8	2472	6	2420	9		(Wang et al., 2020)
LHW02-38			0.54	0.0681	0.0008	1.362	0.0145	0.1463	0.0008	868	23	872	6	880	4		(Wang et al., 2020)
LHW02-39			0.37	0.0683	0.0005	1.28	0.011	0.1364	0.0006	874	14	836	5	824	4		(Wang et al., 2020)
LHW02-40			0.61	0.0997	0.001	3.866	0.0375	0.2835	0.0015	1609	20	1605	8	1609	7		(Wang et al., 2020)
LHW02-41			0.6	0.0685	0.0009	1.266	0.0145	0.1346	0.0008	866	28	829	7	814	4		(Wang et al., 2020)
LHW02-42			0.96	0.0675	0.001	1.288	0.0205	0.1394	0.0011	832	32	838	9	841	6		(Wang et al., 2020)
LHW02-43			0.39	0.0678	0.0006	1.337	0.012	0.1429	0.0007	870	18	861	6	861	4		(Wang et al., 2020)
LHW02-44			0.5	0.0678	0.0008	1.321	0.014	0.1418	0.0006	861	24	854	6	855	3		(Wang et al., 2020)
LHW02-45			0.85	0.1008	0.0011	3.996	0.046	0.2895	0.002	1638	18	1631	10	1638	10		(Wang et al., 2020)
LHW02-46			0.91	0.0668	0.0011	1.28	0.019	0.1397	0.0008	805	36	835	9	843	5		(Wang et al., 2020)
LHW02-47			1.22	0.0691	0.0012	1.302	0.02	0.1374	0.001	874	36	844	9	830	6		(Wang et al., 2020)
LHW02-48			2.33	0.0688	0.0009	1.299	0.0155	0.1373	0.0008	876	28	844	7	829	4		(Wang et al., 2020)
LHW02-49			2.26	0.0727	0.0008	1.545	0.0175	0.1554	0.0009	995	22	947	7	931	5		(Wang et al., 2020)
LHW02-50			1.21	0.0672	0.0014	1.182	0.021	0.1289	0.0011	806	42	789	10	782	6		(Wang et al., 2020)
LHW02-51			1.5	0.0653	0.0007	1.138	0.013	0.1271	0.0007	773	23	770	6	771	4		(Wang et al., 2020)
LHW02-52			1.82	0.1244	0.0013	6.05	0.075	0.3567	0.0026	2013	19	1980	11	1966	13		(Wang et al., 2020)
LHW02-53			1.46	0.0812	0.0012	2.15	0.0295	0.1939	0.0014	1209	29	1166	10	1142	8		(Wang et al., 2020)
LHW02-54			1.26	0.0666	0.0011	1.294	0.0215	0.142	0.0013	817	32	840	10	856	8		(Wang et al., 2020)
LHW02-55			1.28	0.0681	0.0011	1.315	0.021	0.1425	0.001	846	35	850	10	859	6		(Wang et al., 2020)
LHW02-56			1.03	0.0679	0.0008	1.331	0.0165	0.1427	0.0007	851	25	858	7	860	4		(Wang et al., 2020)
LHW02-57			1.3	0.0656	0.0011	1.22	0.02	0.1355	0.0009	780	34	807	9	819	5		(Wang et al., 2020)
LHW02-58			0.83	0.1138	0.0008	5.114	0.037	0.3273	0.0014	1857	12	1837	6	1825	7		(Wang et al., 2020)
LHW02-59			0.93	0.0949	0.0008	3.484	0.0275	0.2677	0.0012	1521	15	1522	6	1529	6		(Wang et al., 2020)
LHW02-60			0.99	0.067	0.0006	1.285	0.012	0.1391	0.0007	830	18	840	6	840	4		(Wang et al., 2020)
LHW02-61			0.9	0.1692	0.0012	11	0.085	0.4744	0.0028	2546	11	2521	7	2502	12		(Wang et al., 2020)
LHW02-62			1.54	0.0674	0.0011	1.248	0.0175	0.1355	0.001	827	32	824	8	819	6		(Wang et al., 2020)
LHW02-63			0.93	0.066	0.0015	1.183	0.025	0.1312	0.0013	778	50	793	12	794	8		(Wang et al., 2020)
LHW02-64			0.82	0.071	0.0014	1.434	0.0295	0.1467	0.0011	923	43	898	13	882	7		(Wang et al., 2020)
LHW02-65			1.64	0.1157	0.0009	5.34	0.05	0.3354	0.0019	1885	14	1873	8	1864	9		(Wang et al., 2020)
LHW02-66			1.09	0.0692	0.0013	1.311	0.0225	0.1383	0.0012	873	39	848	10	835	7		(Wang et al., 2020)
LHW02-67			1.45	0.0699	0.0009	1.482	0.0185	0.1551	0.0011	912	26	921	8	929	6		(Wang et al., 2020)
LHW02-68			0.7	0.1547	0.0014	6.84	0.095	0.3218	0.0026	2393	16	2086	13	1798	13		(Wang et al., 2020)
LHW02-69			0.29	0.0673	0.0006	1.186	0.011	0.1277	0.0005	841	18	795	6	775	3		(Wang et al., 2020)
LHW02-70			1.02	0.1049	0.0008	4.221	0.034	0.2949	0.002	1707	14	1679	7	1665	10		(Wang et al., 2020)
LHW02-71			1.42	0.1062	0.0014	4.18	0.06	0.2872	0.0025	1724	23	1671	11	1627	13		(Wang et al., 2020)
LHW02-72			0.81	0.1062	0.0007	4.437	0.026	0.305	0.0013	1731	12	1719	5	1716	6		(Wang et al., 2020)
LHW02-73			0.87	0.0989	0.0009	3.841	0.0345	0.2836	0.0015	1603	18	1600	7	1609	7		(Wang et al., 2020)
LHW02-74			0.96	0.1652	0.0009	10.78	0.06	0.4762	0.0026	2507	9	2504	6	2510	12		(Wang et al., 2020)
LHW02-75			0.47	0.1807	0.0011	12.45	0.065	0.5022	0.0024	2657	10	2640	6	2623	10		(Wang et al., 2020)
LHW02-76			0.3	0.0664	0.0007	1.261	0.0135	0.1386	0.0008	809	21	827	6	837	4		(Wang et al., 2020)
LHW02-77			0.1	0.0666	0.0005	1.288	0.009	0.1412	0.0008	820	14	840	4	851	5		(Wang et al., 2020)
LHW02-78			0.14	0.0675	0.0013	1.2	0.0225	0.1302	0.0012	818	41	797	11	789	7		(Wang et al., 2020)
LHW02-79			1.02	0.0672	0.0006	1.279	0.0125	0.1381	0.0005	837	20	835	6	834	3		(Wang et al., 2020)
LHW02-80			0.67	0.1128	0.0008	5.277	0.0425	0.3396	0.0022	1846	13	1864	7	1889	11		(Wang et al., 2020)
In5b ( Cryogenian Naghtat Formation)
In5b-a2			1.08	0.0758	0.0042	1.87	0.1159	0.1787	0.0048	1090	112	1070	42	1060	27		(Hoffman et al., 2011)
In5b-a3			0.9	0.0774	0.0081	2.01	0.2151	0.1886	0.0043	1133	209	1120	76	1114	23		(Hoffman et al., 2011)
In5b-a4			0.35	0.1442	0.003	7.92	0.2376	0.3985	0.0084	2279	36	2222	27	2162	39		(Hoffman et al., 2011)
In5b-a7			0.69	0.1122	0.0021	4.56	0.1231	0.2949	0.0056	1836	34	1743	23	1666	28		(Hoffman et al., 2011)
In5b-a10			0.83	0.0715	0.0035	1.63	0.088	0.1652	0.0038	970	100	981	34	986	21		(Hoffman et al., 2011)
In5b-a13			0.33	0.122	0.0043	5.46	0.2948	0.3246	0.013	1986	63	1895	47	1812	64		(Hoffman et al., 2011)
In5b-a14			1.07	0.1632	0.0021	9.86	0.2169	0.4382	0.0079	2489	21	2422	21	2343	36		(Hoffman et al., 2011)
In5b-a16			0.9	0.0941	0.0032	3.1	0.1333	0.2394	0.0065	1509	64	1434	34	1383	34		(Hoffman et al., 2011)
In5b-a20			1.36	0.0728	0.0062	1.72	0.1514	0.1715	0.0039	1008	172	1016	58	1020	22		(Hoffman et al., 2011)
In5b-a21			0.67	0.1001	0.0012	4.08	0.0979	0.2958	0.0062	1625	23	1651	20	1671	31		(Hoffman et al., 2011)
In5b-a27			1	0.0691	0.0023	1.42	0.0611	0.1489	0.0037	902	71	897	26	895	21		(Hoffman et al., 2011)
In5b-a28			0.9	0.167	0.0023	10.82	0.303	0.4696	0.0117	2528	24	2507	27	2482	51		(Hoffman et al., 2011)
In5b-a30			0.49	0.0795	0.0022	2.1	0.0714	0.1911	0.0038	1185	55	1148	24	1128	20		(Hoffman et al., 2011)
In5b-a31			0.94	0.1014	0.0026	3.71	0.1521	0.2651	0.0082	1650	48	1573	33	1516	43		(Hoffman et al., 2011)
In5b-a33			0.4	0.0701	0.0016	1.39	0.0598	0.1442	0.0053	933	48	887	26	868	30		(Hoffman et al., 2011)
In5b-a35			2.19	0.0678	0.0016	1.43	0.0443	0.1531	0.0031	861	49	902	19	918	17		(Hoffman et al., 2011)
In5b-a37			0.65	0.0937	0.0033	3.36	0.1445	0.2597	0.0065	1503	67	1494	35	1489	34		(Hoffman et al., 2011)
In5b-a38			1.34	0.0702	0.0015	1.56	0.0499	0.1612	0.0039	933	44	954	20	964	21		(Hoffman et al., 2011)
In5b-a41			1.66	0.1671	0.0018	11.15	0.3011	0.4837	0.0121	2529	19	2535	26	2544	52		(Hoffman et al., 2011)
In5b-a44			0.8	0.068	0.0025	1.42	0.0596	0.1512	0.0032	869	77	896	26	907	17		(Hoffman et al., 2011)
In5b-a46			0.76	0.0662	0.0046	1.26	0.0945	0.1375	0.004	813	145	826	43	831	22		(Hoffman et al., 2011)
In5b-a52			1.24	0.1052	0.0018	4.25	0.119	0.2933	0.0065	1717	32	1684	23	1658	32		(Hoffman et al., 2011)
In5b-a57			0.56	0.067	0.0016	1.41	0.0423	0.1525	0.0026	838	50	893	18	915	15		(Hoffman et al., 2011)
In5b-a58			0.83	0.0651	0.0015	1.26	0.0378	0.1399	0.0028	779	48	826	17	844	16		(Hoffman et al., 2011)
In5b-a59			1.11	0.166	0.0023	10.44	0.2819	0.4561	0.01	2517	24	2474	25	2422	45		(Hoffman et al., 2011)
In5b-a60			0.98	0.068	0.0024	1.37	0.0603	0.1464	0.0038	868	75	877	26	881	21		(Hoffman et al., 2011)
In5b-a62			1.62	0.0676	0.0026	1.29	0.0606	0.1386	0.0036	857	80	842	27	837	20		(Hoffman et al., 2011)
In5b-2a3			1.3	0.0696	0.0019	1.41	0.0465	0.1471	0.0026	916	57	894	20	884	15		(Hoffman et al., 2011)
In5b-2a4			0.37	0.0699	0.0013	1.44	0.0446	0.1493	0.0037	925	40	905	19	897	21		(Hoffman et al., 2011)
In5b-2a5			1.95	0.0675	0.0032	1.38	0.0731	0.1479	0.0037	853	98	879	32	889	21		(Hoffman et al., 2011)
In5b-2a6			1.09	0.1129	0.0026	5.09	0.168	0.327	0.0078	1846	41	1834	28	1824	38		(Hoffman et al., 2011)
In5b-2a8			0.67	0.0679	0.0013	1.36	0.0381	0.1448	0.003	865	40	870	17	872	17		(Hoffman et al., 2011)
In5b-2a11			1.71	0.0688	0.0014	1.49	0.0462	0.1571	0.0036	893	42	926	19	941	20		(Hoffman et al., 2011)
In5b-2a13			1.4	0.0666	0.0017	1.17	0.041	0.1275	0.0031	825	54	787	20	774	18		(Hoffman et al., 2011)
In5b-2a14			1.07	0.1051	0.0024	4.27	0.1537	0.295	0.0083	1716	41	1689	30	1666	41		(Hoffman et al., 2011)
In5b-2a15			0.57	0.0722	0.004	1.64	0.105	0.1649	0.0054	991	112	986	41	984	30		(Hoffman et al., 2011)
In5b-2a16			0.37	0.0697	0.0015	1.49	0.0417	0.155	0.0031	918	42	926	17	929	17		(Hoffman et al., 2011)
In5b-2a18			1.19	0.0676	0.0026	1.28	0.0563	0.1372	0.003	855	80	836	26	829	17		(Hoffman et al., 2011)
In5b-2a20			1.15	0.0714	0.0022	1.67	0.0651	0.1694	0.0042	968	62	996	25	1009	23		(Hoffman et al., 2011)
In5b-2a22			0.6	0.0696	0.0017	1.51	0.0498	0.1578	0.0032	917	52	936	20	944	18		(Hoffman et al., 2011)
In5b-2a25			1.18	0.068	0.0033	1.34	0.071	0.1435	0.003	867	101	865	31	864	17		(Hoffman et al., 2011)
In5b-2a28			0.54	0.0669	0.0017	1.28	0.0461	0.1386	0.0036	834	51	836	21	837	20		(Hoffman et al., 2011)
In5b-2a29			0.3	0.116	0.0012	5.7	0.1425	0.3562	0.0078	1895	19	1931	21	1964	38		(Hoffman et al., 2011)
In5b-2a31			1.9	0.0691	0.0028	1.37	0.0644	0.1435	0.0036	901	82	875	28	865	20		(Hoffman et al., 2011)
In5b-2a33			0.8	0.0686	0.0018	1.4	0.0504	0.1484	0.0037	888	55	891	22	892	21		(Hoffman et al., 2011)
In5b-2a36			2.22	0.0991	0.0033	3.95	0.1501	0.2893	0.0058	1607	61	1625	32	1638	30		(Hoffman et al., 2011)
In5b-2a41			1.09	0.1872	0.0052	15.08	0.5127	0.5843	0.0117	2717	46	2820	33	2966	47		(Hoffman et al., 2011)
In5b-2a44			0.95	0.1003	0.0022	4.06	0.138	0.2938	0.0076	1629	42	1647	28	1661	37		(Hoffman et al., 2011)
In5b-2a46			1.43	0.0645	0.0067	1.17	0.1287	0.1315	0.0046	757	219	786	62	796	27		(Hoffman et al., 2011)
In5b-2a47			0.93	0.0971	0.002	3.96	0.1346	0.2961	0.008	1569	39	1627	28	1672	39		(Hoffman et al., 2011)
In5b-2a48			0.82	0.0677	0.0029	1.45	0.0725	0.1549	0.0039	858	90	908	30	928	22		(Hoffman et al., 2011)
In5b-2a49			1.22	0.1001	0.0023	3.59	0.1113	0.2603	0.0055	1625	43	1548	25	1492	28		(Hoffman et al., 2011)
In5b-2a54			1.85	0.0697	0.0035	1.41	0.0776	0.1471	0.0035	919	103	895	34	885	20		(Hoffman et al., 2011)
In5b-2a55			0.34	0.1582	0.0022	9.42	0.3862	0.4317	0.0168	2436	25	2379	39	2313	76		(Hoffman et al., 2011)
In5b-2a58			0.85	0.0701	0.0034	1.46	0.0803	0.151	0.0039	932	100	914	34	907	22		(Hoffman et al., 2011)
In5b-2a61			1.13	0.0681	0.0018	1.34	0.0496	0.1428	0.0037	872	56	864	22	861	21		(Hoffman et al., 2011)
In5b-2a63			0.69	0.0772	0.004	2.12	0.1208	0.1993	0.0044	1126	104	1156	40	1172	24		(Hoffman et al., 2011)
In5b-2a64			0.99	0.0719	0.0013	1.52	0.041	0.1534	0.0031	983	36	939	16	920	17		(Hoffman et al., 2011)
In5b-2a66			0.87	0.0712	0.0033	1.58	0.0822	0.1607	0.004	963	94	961	33	961	22		(Hoffman et al., 2011)
In34-a1			1.12	0.0696	0.0029	1.48	0.074	0.1541	0.0045	916	84	922	31	924	25		(Hoffman et al., 2011)
In34-a2			2.05	0.0678	0.0028	1.31	0.0655	0.1407	0.0041	862	84	852	29	848	23		(Hoffman et al., 2011)
In34-a4			0.94	0.0716	0.0019	1.63	0.0571	0.1655	0.004	973	53	983	22	987	22		(Hoffman et al., 2011)
In34-a5			1.23	0.0661	0.0024	1.2	0.0528	0.1316	0.0033	810	75	801	25	797	19		(Hoffman et al., 2011)
In34-a6			0.2	0.0672	0.0008	1.25	0.035	0.1349	0.0034	844	26	823	16	816	20		(Hoffman et al., 2011)
In34-a7			1.77	0.0664	0.0018	1.24	0.0459	0.1353	0.0034	819	57	819	21	818	19		(Hoffman et al., 2011)
In34-a8			1.27	0.0665	0.0041	1.19	0.0774	0.1302	0.0025	823	130	798	37	789	14		(Hoffman et al., 2011)
In34-a9			0.72	0.0665	0.0014	1.19	0.0357	0.1299	0.0029	821	43	796	17	787	16		(Hoffman et al., 2011)
In34-a10			1.89	0.0698	0.0023	1.42	0.0582	0.1477	0.0035	921	67	898	25	888	20		(Hoffman et al., 2011)
In34-a12			0.87	0.0643	0.0021	1.1	0.0462	0.1244	0.0031	753	70	755	22	756	18		(Hoffman et al., 2011)
In34-a14			0.55	0.067	0.0019	1.28	0.0525	0.1386	0.004	837	60	837	23	837	22		(Hoffman et al., 2011)
In34-a15			0.38	0.0651	0.0022	1.23	0.0541	0.1375	0.0039	778	71	816	25	830	22		(Hoffman et al., 2011)
In34-a16			0.52	0.0677	0.0017	1.34	0.0456	0.1441	0.0032	859	52	865	20	868	18		(Hoffman et al., 2011)
In34-a18			1.38	0.0658	0.0018	1.23	0.0443	0.1353	0.0031	801	59	814	20	818	18		(Hoffman et al., 2011)
In34-a20			1.24	0.0688	0.0023	1.42	0.0596	0.1494	0.0039	893	68	897	25	898	22		(Hoffman et al., 2011)
In34-a21			0.63	0.0659	0.002	1.13	0.0407	0.1246	0.0025	803	62	769	19	757	14		(Hoffman et al., 2011)
In34-a22			0.56	0.0671	0.0017	1.3	0.0429	0.1403	0.0032	842	51	845	19	846	18		(Hoffman et al., 2011)
In34-a23			0.21	0.0717	0.0011	1.71	0.0445	0.1728	0.0035	978	33	1012	17	1028	19		(Hoffman et al., 2011)
In34-a24			0.76	0.0663	0.002	1.19	0.0464	0.1299	0.0031	815	63	794	22	787	18		(Hoffman et al., 2011)
In34-a25			2.46	0.0696	0.0047	1.44	0.1066	0.1505	0.0042	916	140	908	45	904	24		(Hoffman et al., 2011)
In34-a26			0.31	0.0661	0.002	1.27	0.0508	0.1395	0.0033	811	66	833	23	842	19		(Hoffman et al., 2011)
In34-a27			1.39	0.0701	0.0044	1.5	0.1095	0.1554	0.0056	932	130	931	45	931	31		(Hoffman et al., 2011)
In34-a28			0.16	0.0678	0.0016	1.37	0.0562	0.1468	0.0048	862	49	877	24	883	28		(Hoffman et al., 2011)
In34-a29			1.08	0.0714	0.0016	1.6	0.0784	0.163	0.0072	969	44	972	31	973	40		(Hoffman et al., 2011)
In34-a30			2.08	0.0667	0.0023	1.29	0.0529	0.1398	0.0032	828	71	839	24	844	19		(Hoffman et al., 2011)
In34-a31			0.91	0.0678	0.0045	1.36	0.0979	0.1452	0.0036	861	139	870	43	874	21		(Hoffman et al., 2011)
In34-a32			1.76	0.0672	0.0021	1.29	0.0516	0.1396	0.0036	844	65	843	23	842	20		(Hoffman et al., 2011)
In34-a33			0.78	0.0692	0.0022	1.43	0.0586	0.1504	0.0038	903	66	903	25	903	21		(Hoffman et al., 2011)
In34-a34			0.84	0.0664	0.0019	1.25	0.0463	0.1361	0.0031	820	60	822	21	823	18		(Hoffman et al., 2011)
In34-a35			0.93	0.182	0.0025	12.8	0.3712	0.5098	0.0127	2672	23	2665	27	2656	55		(Hoffman et al., 2011)
In34-a36			0.82	0.1124	0.0018	5.03	0.1207	0.3245	0.0055	1839	29	1825	20	1812	28		(Hoffman et al., 2011)
In34-a37			1.39	0.0763	0.0027	1.9	0.0855	0.1804	0.0051	1102	71	1080	31	1069	28		(Hoffman et al., 2011)
In34-a38			0.32	0.0688	0.0013	1.44	0.0432	0.1515	0.0033	892	40	904	18	909	19		(Hoffman et al., 2011)
In34-a39			0.5	0.0655	0.0014	1.17	0.0386	0.1294	0.0032	790	44	786	18	785	19		(Hoffman et al., 2011)
In34-a40			0.15	0.0667	0.001	1.24	0.0322	0.1346	0.003	829	32	818	15	814	16		(Hoffman et al., 2011)
In34-a41			0.34	0.0656	0.0014	1.16	0.0406	0.1278	0.0035	792	46	780	19	776	20		(Hoffman et al., 2011)
In34-a43			1.36	0.0667	0.0036	1.27	0.0737	0.1377	0.0028	828	112	831	33	832	16		(Hoffman et al., 2011)
In34-a44			0.57	0.1047	0.0024	4.4	0.1584	0.3047	0.0082	1708	43	1712	30	1714	41		(Hoffman et al., 2011)
In34-a45			1.81	0.0633	0.003	1.03	0.0577	0.1179	0.0037	717	101	718	29	719	21		(Hoffman et al., 2011)
In34-a46			2.76	0.0663	0.0026	1.24	0.0595	0.1357	0.0037	814	82	819	27	820	21		(Hoffman et al., 2011)
In34-a47			1.22	0.0687	0.0023	1.42	0.0582	0.15	0.0035	890	69	898	25	901	19		(Hoffman et al., 2011)
In34-a48			1.83	0.0665	0.0049	1.27	0.1003	0.1384	0.0037	823	155	832	46	836	21		(Hoffman et al., 2011)
In34-a49			0.49	0.067	0.0019	1.31	0.0472	0.1422	0.0033	837	58	852	21	857	19		(Hoffman et al., 2011)
In34-a51			1.21	0.0705	0.0044	1.56	0.1061	0.16	0.0043	943	128	953	43	957	24		(Hoffman et al., 2011)
In34-a52			0.69	0.0691	0.002	1.43	0.0501	0.1503	0.003	901	59	902	21	903	17		(Hoffman et al., 2011)
In34-a54			0.57	0.0693	0.0019	1.46	0.0482	0.153	0.0029	907	55	915	20	918	16		(Hoffman et al., 2011)
In34-a56			0.68	0.0667	0.0015	1.27	0.0368	0.1384	0.0026	830	45	834	17	835	15		(Hoffman et al., 2011)
In34-a57			0.46	0.0676	0.0014	1.38	0.04	0.1478	0.0031	857	42	879	17	888	17		(Hoffman et al., 2011)
In34-a60			0.71	0.0669	0.0024	1.23	0.0492	0.1339	0.0023	834	76	817	23	810	13		(Hoffman et al., 2011)
In34-2a1			0.56	0.0664	0.0019	1.26	0.0504	0.1378	0.004	819	59	829	23	832	22		(Hoffman et al., 2011)
In34-2a2			1.07	0.0654	0.0037	1.16	0.0719	0.1287	0.0032	786	119	782	34	780	19		(Hoffman et al., 2011)
In34-2a3			0.97	0.0689	0.0022	1.47	0.0603	0.1552	0.0042	897	65	920	25	930	23		(Hoffman et al., 2011)
In34-2a4			5.1	0.0715	0.0024	1.58	0.0648	0.1599	0.0038	970	67	960	26	956	21		(Hoffman et al., 2011)
In34-2a6			0.5	0.068	0.0029	1.33	0.0665	0.142	0.0038	868	87	859	29	856	22		(Hoffman et al., 2011)
In34-2a7			0.95	0.0666	0.0014	1.29	0.0374	0.1404	0.0029	826	43	841	17	847	17		(Hoffman et al., 2011)
In34-2a9			0.45	0.0667	0.0017	1.25	0.0463	0.1355	0.0035	829	54	822	21	819	20		(Hoffman et al., 2011)
In34-2a10			0.65	0.0685	0.0021	1.37	0.0521	0.1453	0.0032	885	64	877	23	874	18		(Hoffman et al., 2011)
In34-2a11			0.61	0.0666	0.0019	1.23	0.0492	0.1343	0.0039	825	58	816	23	812	22		(Hoffman et al., 2011)
In34-2a15			0.77	0.0647	0.0017	1.12	0.0414	0.1258	0.0031	764	57	764	20	764	18		(Hoffman et al., 2011)
In34-2a16			0.35	0.0685	0.0021	1.41	0.0536	0.149	0.0031	885	64	893	23	896	18		(Hoffman et al., 2011)
In34-2a17			0.24	0.0689	0.0017	1.38	0.0511	0.1447	0.0041	896	52	878	22	871	23		(Hoffman et al., 2011)
In34-2a18			0.29	0.0659	0.0016	1.2	0.0432	0.1324	0.0034	804	53	802	20	801	19		(Hoffman et al., 2011)
In34-2a19			0.99	0.1143	0.0019	5.32	0.1436	0.3373	0.0067	1869	31	1872	23	1874	33		(Hoffman et al., 2011)
In34-2a21			0.96	0.0977	0.0017	3.7	0.1036	0.2746	0.006	1582	31	1572	22	1564	30		(Hoffman et al., 2011)
In34-2a22			0.51	0.0645	0.0025	1.09	0.0698	0.123	0.0063	759	82	750	35	748	36		(Hoffman et al., 2011)
In34-2a25			1.24	0.0718	0.0022	1.55	0.0589	0.1564	0.0036	982	61	950	24	937	20		(Hoffman et al., 2011)
In34-2a26			1.4	0.0676	0.002	1.31	0.0498	0.1407	0.0032	856	63	851	22	849	18		(Hoffman et al., 2011)
In34-2a28			1.09	0.0639	0.0019	1.07	0.0417	0.1211	0.003	739	64	737	21	737	17		(Hoffman et al., 2011)
In34-2a29			1.86	0.064	0.0017	1.07	0.0407	0.1209	0.0033	743	56	737	20	736	19		(Hoffman et al., 2011)
In34-2a30			1.03	0.0685	0.003	1.36	0.0734	0.1443	0.0045	885	91	873	32	869	25		(Hoffman et al., 2011)
In34-2a31			1.21	0.0668	0.0019	1.29	0.0477	0.1396	0.0034	831	58	840	21	843	19		(Hoffman et al., 2011)
In34-2a34			1.15	0.0664	0.0025	1.28	0.0602	0.1395	0.0039	820	78	836	27	842	22		(Hoffman et al., 2011)
In34-2a36			1.39	0.0677	0.0047	1.26	0.0983	0.1349	0.0049	861	143	828	45	816	28		(Hoffman et al., 2011)
In34-2a37			0.29	0.1549	0.0033	9.99	0.3397	0.4678	0.0126	2401	36	2434	32	2474	56		(Hoffman et al., 2011)
In34-2a38			1.16	0.1138	0.0028	5.22	0.1827	0.3326	0.0083	1861	45	1855	30	1851	40		(Hoffman et al., 2011)
In34-2a39			1.63	0.1209	0.0022	6.04	0.1752	0.3621	0.0083	1969	33	1981	26	1992	40		(Hoffman et al., 2011)
In34-2a40			1.43	0.065	0.0072	1.13	0.1367	0.1262	0.0064	774	232	768	68	766	37		(Hoffman et al., 2011)
In34-2a41			0.81	0.0687	0.0026	1.35	0.0581	0.1429	0.0029	890	79	869	26	861	16		(Hoffman et al., 2011)
In34-2a43			1.29	0.0691	0.0032	1.45	0.0783	0.1518	0.0041	900	96	908	33	911	23		(Hoffman et al., 2011)
In34-2a45			1.73	0.067	0.0036	1.28	0.0755	0.139	0.0033	839	113	839	34	839	19		(Hoffman et al., 2011)
In34-2a46			0.65	0.0693	0.0051	1.44	0.1123	0.1509	0.0036	909	152	907	48	906	20		(Hoffman et al., 2011)
In34-2a47			0.37	0.1031	0.0019	4.19	0.1467	0.2948	0.0088	1681	34	1672	30	1665	45		(Hoffman et al., 2011)
In34-2a48			0.9	0.0672	0.0028	1.32	0.0726	0.1425	0.0051	843	86	854	32	859	29		(Hoffman et al., 2011)
In34-2a49			0.7	0.0676	0.0022	1.33	0.0519	0.1426	0.0033	856	66	858	23	859	19		(Hoffman et al., 2011)
In34-2a51			0.65	0.0693	0.0028	1.47	0.072	0.1534	0.0044	909	82	917	30	920	25		(Hoffman et al., 2011)
In34-2a55			1.73	0.1064	0.0035	4.53	0.2401	0.309	0.013	1739	60	1737	45	1736	65		(Hoffman et al., 2011)
In34-2a56			0.3	0.0683	0.0012	1.39	0.0431	0.1477	0.0037	878	37	885	18	888	21		(Hoffman et al., 2011)
In34-2a57			0.8	0.0681	0.002	1.3	0.0546	0.1383	0.004	873	62	845	24	835	23		(Hoffman et al., 2011)
In34-2a58			0.95	0.0665	0.002	1.26	0.0504	0.1376	0.0036	821	63	828	23	831	21		(Hoffman et al., 2011)
In34-2a59			1.29	0.0706	0.0013	1.56	0.0515	0.1598	0.0043	946	39	953	21	956	24		(Hoffman et al., 2011)
In34-2a60			0.78	0.0683	0.003	1.36	0.0789	0.1441	0.0055	878	92	871	35	868	31		(Hoffman et al., 2011)
LHW01 (Cryogenian Nagthat)
LHW01-01			0.88	0.0684	0.0007	1.264	0.013	0.1343	0.0006	871	22	828	6	813	3		(Wang et al., 2020)
LHW01-02			0.41	0.0677	0.0006	1.303	0.0105	0.1402	0.0006	853	17	846	5	846	3		(Wang et al., 2020)
LHW01-03			0.34	0.0678	0.0007	1.302	0.0135	0.1397	0.0006	852	20	845	6	843	3		(Wang et al., 2020)
LHW01-04			0.46	0.0673	0.0006	1.318	0.011	0.1434	0.0007	838	18	853	5	864	4		(Wang et al., 2020)
LHW01-05			0.71	0.0655	0.0008	1.242	0.014	0.1382	0.0007	777	26	818	7	835	4		(Wang et al., 2020)
LHW01-06			0.39	0.0671	0.0005	1.321	0.0095	0.1431	0.0006	834	16	854	4	862	3		(Wang et al., 2020)
LHW01-07			1.04	0.0659	0.0009	1.162	0.016	0.1288	0.0007	799	26	781	8	781	4		(Wang et al., 2020)
LHW01-08			0.5	0.0688	0.0006	1.347	0.011	0.1417	0.0005	886	17	865	5	854	3		(Wang et al., 2020)
LHW01-09			0.39	0.0678	0.0009	1.347	0.017	0.1447	0.0008	846	28	865	8	871	5		(Wang et al., 2020)
LHW01-10			0.14	0.0682	0.0007	1.334	0.0125	0.1424	0.0005	864	20	860	6	858	3		(Wang et al., 2020)
LHW01-11			0.87	0.0649	0.001	1.135	0.0175	0.1279	0.0008	763	29	768	8	776	4		(Wang et al., 2020)
LHW01-12			0.49	0.1023	0.0005	3.986	0.0225	0.2846	0.0011	1664	9	1631	5	1614	6		(Wang et al., 2020)
LHW01-13			0.77	0.0661	0.0007	1.27	0.015	0.1395	0.0009	806	24	831	7	842	5		(Wang et al., 2020)
LHW01-14			0.52	0.0688	0.0008	1.281	0.0165	0.1362	0.0008	878	25	836	8	823	4		(Wang et al., 2020)
LHW01-15			0.38	0.0673	0.0008	1.317	0.014	0.1441	0.0009	835	23	852	6	868	5		(Wang et al., 2020)
LHW01-16			0.48	0.0667	0.0006	1.273	0.0115	0.1391	0.0007	820	19	833	5	839	4		(Wang et al., 2020)
LHW01-17			0.4	0.0677	0.0009	1.329	0.0165	0.1435	0.0007	855	25	857	7	864	4		(Wang et al., 2020)
LHW01-18			0.6	0.0679	0.0005	1.34	0.01	0.1433	0.0006	860	16	863	4	863	4		(Wang et al., 2020)
LHW01-19			0.31	0.068	0.0006	1.338	0.0105	0.1433	0.0006	861	18	862	4	863	3		(Wang et al., 2020)
LHW01-20			1.35	0.0681	0.0006	1.247	0.023	0.1338	0.0022	877	17	818	11	809	13		(Wang et al., 2020)
LHW01-21			0.18	0.0684	0.0006	1.349	0.011	0.144	0.0008	873	16	866	5	867	5		(Wang et al., 2020)
LHW01-22			0.53	0.0661	0.0011	1.213	0.0185	0.1337	0.0007	784	36	804	9	809	4		(Wang et al., 2020)
LHW01-23			0.47	0.0655	0.0006	1.227	0.0095	0.1364	0.0005	785	17	813	4	824	3		(Wang et al., 2020)
LHW01-24			0.1	0.0675	0.0006	1.321	0.0125	0.1419	0.0006	847	18	854	6	855	3		(Wang et al., 2020)
LHW01-25			0.37	0.0664	0.0006	1.261	0.011	0.1385	0.0006	813	18	828	5	836	4		(Wang et al., 2020)
LHW01-26			0.31	0.0686	0.0009	1.383	0.0195	0.1477	0.0011	880	26	879	8	888	6		(Wang et al., 2020)
LHW01-27			0.73	0.0662	0.0008	1.282	0.0155	0.1409	0.0008	797	26	836	7	850	5		(Wang et al., 2020)
LHW01-28			0.45	0.0676	0.0005	1.352	0.012	0.1449	0.0007	855	17	868	5	872	4		(Wang et al., 2020)
LHW01-29			0.91	0.0647	0.0008	1.176	0.0145	0.1325	0.0008	751	27	788	7	802	4		(Wang et al., 2020)
LHW01-30			0.72	0.066	0.0008	0.96	0.0125	0.106	0.0009	793	25	682	7	649	5		(Wang et al., 2020)
LHW01-31			0.58	0.0682	0.0006	1.334	0.009	0.1428	0.0006	867	17	860	4	861	3		(Wang et al., 2020)
LHW01-32			0.83	0.0661	0.0007	1.254	0.012	0.1379	0.0007	809	21	824	6	833	4		(Wang et al., 2020)
LHW01-33			0.62	0.1134	0.0007	5.143	0.0365	0.3308	0.0015	1851	11	1842	6	1842	7		(Wang et al., 2020)
LHW01-34			0.39	0.0673	0.0007	1.306	0.0115	0.141	0.0007	835	22	848	5	850	4		(Wang et al., 2020)
LHW01-35			0.2	0.0664	0.0004	1.263	0.0075	0.1386	0.0005	813	14	831	4	837	3		(Wang et al., 2020)
LHW01-36			0.62	0.0663	0.0005	1.261	0.0085	0.1383	0.0006	810	16	828	4	835	3		(Wang et al., 2020)
LHW01-37			0.52	0.0667	0.0007	1.247	0.014	0.1361	0.0007	818	23	821	7	823	4		(Wang et al., 2020)
LHW01-38			0.34	0.0705	0.0008	1.439	0.015	0.1482	0.0007	929	24	904	6	891	4		(Wang et al., 2020)
LHW01-39			3.21	0.1002	0.0041	1.76	0.07	0.1297	0.002	1500	75	1013	25	786	12		(Wang et al., 2020)
LHW01-40			0.99	0.0693	0.0009	1.365	0.0175	0.1442	0.001	891	27	872	8	868	6		(Wang et al., 2020)
LHW01-41			0.33	0.0722	0.0008	1.356	0.014	0.1368	0.0011	983	20	869	6	826	6		(Wang et al., 2020)
LHW01-42			1.57	0.0646	0.0027	1.183	0.047	0.1338	0.0023	660	90	778	22	809	13		(Wang et al., 2020)
LHW01-43			1.84	0.0677	0.0006	1.094	0.0095	0.1182	0.0006	854	17	750	5	720	3		(Wang et al., 2020)
LHW01-44			0.43	0.0686	0.0012	1.325	0.0195	0.1423	0.001	863	34	855	9	858	6		(Wang et al., 2020)
LHW01-45			1	0.0706	0.0023	1.422	0.0465	0.1459	0.002	880	70	887	20	878	11		(Wang et al., 2020)
LHW01-46			0.37	0.0674	0.0004	1.169	0.015	0.1258	0.0015	847	14	784	7	764	9		(Wang et al., 2020)
LHW01-47			0.32	0.0694	0.0004	0.954	0.0245	0.1009	0.0026	906	13	675	13	618	16		(Wang et al., 2020)
LHW01-48			0.06	0.066	0.0004	1.027	0.0085	0.1133	0.0011	803	12	715	4	692	7		(Wang et al., 2020)
LHW01-49			0.61	0.0668	0.0019	1.233	0.0305	0.1357	0.0015	770	60	810	14	820	8		(Wang et al., 2020)
LHW01-50			0.32	0.0699	0.0016	1.34	0.0335	0.138	0.0012	920	47	857	15	833	7		(Wang et al., 2020)
LHW01-51			1.15	0.0689	0.0008	1.33	0.0145	0.1414	0.0008	883	23	860	7	852	4		(Wang et al., 2020)
LHW01-52			0.71	0.0731	0.0014	1.285	0.0255	0.1284	0.001	985	40	835	12	779	6		(Wang et al., 2020)
LHW01-53			0.38	0.0668	0.0009	1.371	0.024	0.1499	0.002	829	25	873	10	900	12		(Wang et al., 2020)
LHW01-54			0.35	0.0678	0.0009	1.315	0.017	0.1414	0.0008	847	27	850	8	854	5		(Wang et al., 2020)
LHW01-55			0.36	0.0687	0.0008	1.398	0.0155	0.1482	0.0009	877	24	887	7	891	5		(Wang et al., 2020)
LHW01-56			1.09	0.0655	0.0007	1.143	0.0135	0.1273	0.0006	781	22	773	7	773	3		(Wang et al., 2020)
LHW01-57			1.55	0.0672	0.001	1.304	0.0185	0.1413	0.0009	821	33	845	8	852	5		(Wang et al., 2020)
LHW01-58			0.33	0.0676	0.0008	1.263	0.015	0.1355	0.0006	845	23	828	7	819	4		(Wang et al., 2020)
LHW01-59			0.33	0.0671	0.0008	1.339	0.0125	0.1445	0.0007	849	21	862	6	870	4		(Wang et al., 2020)
LHW01-60			0.37	0.0709	0.0004	1.106	0.007	0.1137	0.0005	951	11	756	3	694	3		(Wang et al., 2020)
LHW01-61			0.38	0.0693	0.0015	1.3	0.028	0.1371	0.0011	867	46	841	13	828	7		(Wang et al., 2020)
LHW01-62			0.43	0.0676	0.0009	1.332	0.017	0.1442	0.0008	842	27	858	8	868	4		(Wang et al., 2020)
LHW01-63			0.46	0.0677	0.0005	1.342	0.0105	0.1445	0.0006	855	15	866	5	870	3		(Wang et al., 2020)
LHW01-64			0.86	0.0672	0.0006	0.613	0.009	0.0662	0.0011	837	19	484	6	413	7		(Wang et al., 2020)
LHW01-65			0.44	0.068	0.0006	1.31	0.0125	0.1403	0.0007	862	18	849	6	847	4		(Wang et al., 2020)
LHW01-66			0.47	0.0692	0.0015	1.329	0.025	0.1402	0.0011	865	44	855	11	846	6		(Wang et al., 2020)
LHW01-67			0.51	0.1117	0.0005	4.988	0.0255	0.3244	0.0012	1829	8	1817	4	1811	6		(Wang et al., 2020)
LHW01-68			0.45	0.0688	0.0011	1.356	0.022	0.1434	0.001	869	34	868	10	863	6		(Wang et al., 2020)
LHW01-69			0.25	0.0674	0.0005	1.187	0.011	0.1281	0.0011	844	15	796	6	777	6		(Wang et al., 2020)
LHW01-70			0.9	0.0763	0.002	1.362	0.0295	0.1307	0.001	1050	50	868	13	792	6		(Wang et al., 2020)
LHW01-71			1.09	0.0651	0.0014	1.182	0.0245	0.1327	0.001	739	46	788	12	803	6		(Wang et al., 2020)
LHW01-72			0.27	0.0685	0.0006	1.342	0.0115	0.1422	0.0006	876	18	863	5	857	3		(Wang et al., 2020)
LHW01-73			0.82	0.0667	0.0009	1.199	0.0165	0.1315	0.0009	823	28	798	8	796	5		(Wang et al., 2020)
LHW01-74			0.38	0.0693	0.0012	1.331	0.0215	0.1401	0.001	882	35	857	10	845	6		(Wang et al., 2020)
LHW01-75			0.51	0.0682	0.0007	1.33	0.013	0.1418	0.0007	873	19	858	6	855	4		(Wang et al., 2020)
LHW01-76			0.56	0.0668	0.0006	1.29	0.011	0.141	0.0007	823	18	841	5	850	4		(Wang et al., 2020)
SJM (Cryogenian Chandpur Formation)
SJM-1			3.82	9.529	0.0376	4.541	0.1234	0.3139	0.0084	1713	7	1739	23	1760	41		(McKenzie et al., 2011)
SJM-2			2.08	14.75	0.2005	1.351	0.0486	0.1445	0.0048	862	28	868	21	870	27		(McKenzie et al., 2011)
SJM-3			1.99	14.3	0.6026	1.491	0.0784	0.1547	0.0049	926	87	927	32	927	27		(McKenzie et al., 2011)
SJM-4			1.56	14.87	0.5922	1.258	0.0628	0.1356	0.0041	846	83	827	28	820	23		(McKenzie et al., 2011)
SJM-5			1.56	14.48	0.445	1.335	0.0557	0.1402	0.004	901	63	861	24	846	22		(McKenzie et al., 2011)
SJM-6			3.76	14.64	0.3501	1.289	0.043	0.1368	0.0032	878	50	841	19	826	18		(McKenzie et al., 2011)
SJM-7			2.27	15.17	0.1986	1.235	0.0541	0.1358	0.0057	804	27	816	25	821	32		(McKenzie et al., 2011)
SJM-8			2.93	15.03	0.2231	1.29	0.0593	0.1406	0.0061	823	31	841	26	848	35		(McKenzie et al., 2011)
SJM-9			1.97	14.56	0.0662	1.402	0.0785	0.1481	0.0083	889	9	890	33	890	46		(McKenzie et al., 2011)
SJM-10			7.87	12.67	0.7028	1.873	0.1602	0.1721	0.0112	1171	110	1072	57	1023	62		(McKenzie et al., 2011)
SJM-11			6.77	14.52	0.1699	1.41	0.0348	0.1485	0.0032	895	24	893	15	892	18		(McKenzie et al., 2011)
SJM-12			3.39	14.96	0.3501	1.32	0.0542	0.1432	0.0048	833	49	854	24	863	27		(McKenzie et al., 2011)
SJM-13			5.23	8.621	0.0312	5.383	0.153	0.3366	0.0095	1895	7	1882	24	1870	46		(McKenzie et al., 2011)
SJM-14			3.2	8.899	0.046	5.022	0.1544	0.3241	0.0098	1838	9	1823	26	1810	48		(McKenzie et al., 2011)
SJM-15			3.69	14.77	0.2242	1.346	0.0467	0.1441	0.0045	860	31	866	20	868	25		(McKenzie et al., 2011)
SJM-16			1.81	8.808	0.0468	5.147	0.1562	0.3288	0.0098	1857	10	1844	26	1832	48		(McKenzie et al., 2011)
SJM-18			3.07	14.82	0.3603	1.288	0.0573	0.1384	0.0052	853	51	840	25	836	29		(McKenzie et al., 2011)
SJM-19			2.34	14.75	0.2895	1.387	0.0482	0.1484	0.0042	863	41	884	20	892	24		(McKenzie et al., 2011)
SJM-20			2.1	14.81	0.4829	1.293	0.0569	0.1389	0.0041	854	68	843	25	838	23		(McKenzie et al., 2011)
SJM-21			2.14	14.76	0.595	1.336	0.0645	0.143	0.0038	861	84	862	28	862	21		(McKenzie et al., 2011)
SJM-22			3.38	14.79	0.1357	1.32	0.0378	0.1416	0.0038	856	19	854	17	854	22		(McKenzie et al., 2011)
SJM-23			2.71	12.73	0.0421	1.97	0.0446	0.182	0.0041	1161	7	1105	15	1078	22		(McKenzie et al., 2011)
SJM-25			2.82	14.35	0.4357	1.333	0.0559	0.1388	0.004	919	62	860	24	838	23		(McKenzie et al., 2011)
SJM-27			1.49	14.6	0.6062	1.135	0.0927	0.1201	0.0085	884	86	770	44	731	49		(McKenzie et al., 2011)
SJM-28			2.99	15.02	0.1286	1.289	0.0287	0.1404	0.0029	825	18	841	13	847	16		(McKenzie et al., 2011)
SJM-29			2.21	11.71	0.2263	2.738	0.1346	0.2325	0.0105	1324	37	1339	37	1348	55		(McKenzie et al., 2011)
SJM-30			2.87	14.39	0.5961	1.334	0.0721	0.1392	0.0048	913	85	861	31	840	27		(McKenzie et al., 2011)
SJM-31			0.94	15.03	0.5046	1.28	0.0597	0.1395	0.0045	823	70	837	27	842	26		(McKenzie et al., 2011)
SJM-33			1.39	14.81	0.1448	1.269	0.0317	0.1363	0.0031	854	20	832	14	824	18		(McKenzie et al., 2011)
SJM-35			2.76	15.02	0.3105	1.179	0.0464	0.1285	0.0043	824	43	791	22	779	25		(McKenzie et al., 2011)
SJM-36			9.08	14.66	0.1278	1.427	0.0302	0.1516	0.0029	876	18	900	13	910	16		(McKenzie et al., 2011)
SJM-37			1.89	14.96	0.3364	1.328	0.0588	0.1441	0.0055	833	47	858	26	868	31		(McKenzie et al., 2011)
SJM-38			3.1	14.48	0.2943	1.424	0.0611	0.1495	0.0057	901	42	899	26	898	32		(McKenzie et al., 2011)
SJM-40			4.89	8.957	0.0496	4.889	0.1902	0.3176	0.0122	1826	10	1800	33	1778	60		(McKenzie et al., 2011)
SJM-43			2.92	15.04	0.6361	1.222	0.0686	0.1333	0.0049	822	88	811	31	806	28		(McKenzie et al., 2011)
SJM-44			1.19	14.94	0.0591	1.292	0.0425	0.14	0.0046	836	8	842	19	845	26		(McKenzie et al., 2011)
SJM-45			1.81	15.37	1.428	1.116	0.1074	0.1244	0.0032	776	196	761	52	756	18		(McKenzie et al., 2011)
SJM-46			1.5	6.173	0.0305	10.08	0.4112	0.4514	0.0183	2477	8	2442	38	2402	81		(McKenzie et al., 2011)
SJM-47			2.68	14.19	0.7378	1.422	0.0983	0.1464	0.0067	942	107	898	41	881	38		(McKenzie et al., 2011)
SJM-48			6.46	14.51	0.2235	1.439	0.0585	0.1514	0.0057	896	32	905	24	909	32		(McKenzie et al., 2011)
SJM-49			1.48	14.47	0.2539	1.418	0.0458	0.1488	0.004	903	36	897	19	894	23		(McKenzie et al., 2011)
SJM-50			1.56	10.15	0.0402	3.821	0.1032	0.2814	0.0075	1596	7	1597	22	1598	38		(McKenzie et al., 2011)
SJM-51			2.5	8.887	0.0287	5.045	0.0957	0.3252	0.0061	1841	6	1827	16	1815	30		(McKenzie et al., 2011)
SJM-52			2.22	8.842	0.0984	5.167	0.1412	0.3314	0.0083	1850	20	1847	23	1845	40		(McKenzie et al., 2011)
SJM-53			1.03	15.14	0.1238	1.173	0.0378	0.1288	0.004	808	17	788	18	781	23		(McKenzie et al., 2011)
SJM-55			2.27	14.58	0.6849	1.401	0.077	0.1482	0.0042	886	97	889	33	891	24		(McKenzie et al., 2011)
SJM-56			1.54	14.87	0.1641	1.332	0.0307	0.1436	0.0029	846	23	860	13	865	16		(McKenzie et al., 2011)
SJM-57			2.77	14.45	0.2184	1.43	0.0481	0.1498	0.0045	905	31	902	20	900	25		(McKenzie et al., 2011)
SJM-59			13.1	14.9	0.1182	1.316	0.0229	0.1421	0.0022	842	16	853	10	857	12		(McKenzie et al., 2011)
SJM-60			1.44	14.84	0.1065	1.226	0.0203	0.132	0.002	849	15	812	9	799	11		(McKenzie et al., 2011)
SJM-61			3.27	6.672	0.0741	7.454	0.3053	0.3607	0.0142	2345	19	2168	37	1985	67		(McKenzie et al., 2011)
SJM-62			1.43	14.45	0.3819	1.346	0.0664	0.1411	0.0059	904	54	866	29	851	33		(McKenzie et al., 2011)
SJM-63			4.08	14.64	0.264	1.373	0.0389	0.1458	0.0032	878	37	877	17	877	18		(McKenzie et al., 2011)
SJM-64			1.82	14.19	1.4153	1.327	0.1412	0.1367	0.0051	941	205	858	62	826	29		(McKenzie et al., 2011)
SJM-65			4.89	15.05	1.1789	1.302	0.1048	0.1422	0.0026	820	164	847	46	857	15		(McKenzie et al., 2011)
SJM-66			4.61	14.6	0.0829	1.364	0.0383	0.1444	0.004	884	12	873	16	869	22		(McKenzie et al., 2011)
SJM-67			4.64	11.64	0.5525	2.03	0.1317	0.1713	0.0076	1337	92	1125	44	1019	42		(McKenzie et al., 2011)
SJM-68			1.88	14.7	0.3782	1.309	0.0656	0.1395	0.006	870	53	850	29	842	34		(McKenzie et al., 2011)
SJM-70			2.24	14.87	0.3744	1.289	0.0545	0.139	0.0047	845	52	841	24	839	27		(McKenzie et al., 2011)
SJM-71			2.3	15.18	0.5879	1.269	0.055	0.1396	0.0027	803	81	832	25	843	15		(McKenzie et al., 2011)
SJM-72			3.25	14.86	0.8027	1.316	0.0781	0.1418	0.0035	847	112	853	34	855	20		(McKenzie et al., 2011)
SJM-73			3.1	6.307	0.0181	10.03	0.1322	0.4588	0.0059	2440	5	2438	12	2434	26		(McKenzie et al., 2011)
SJM-74			13	14.63	0.0935	1.324	0.0216	0.1405	0.0021	880	13	856	9	848	12		(McKenzie et al., 2011)
SJM-75			0.82	14.45	0.2671	1.432	0.0872	0.1501	0.0087	905	38	903	36	902	49		(McKenzie et al., 2011)
SJM-76			5.46	14.47	0.1292	1.43	0.0283	0.1501	0.0027	902	18	901	12	901	15		(McKenzie et al., 2011)
SJM-77			7.44	14.58	0.2754	1.416	0.0601	0.1497	0.0057	887	39	896	25	899	32		(McKenzie et al., 2011)
SJM-79			1.78	14.44	0.9109	1.351	0.0899	0.1414	0.003	907	130	868	39	853	17		(McKenzie et al., 2011)
SJM-82			1.86	14.68	0.1325	1.335	0.0314	0.1421	0.0031	872	19	861	14	857	17		(McKenzie et al., 2011)
SJM-83			6.39	14.54	0.1295	1.468	0.0776	0.1548	0.0081	892	18	917	32	928	45		(McKenzie et al., 2011)
SJM-84			3.09	14.78	0.1951	1.337	0.0347	0.1433	0.0032	858	27	862	15	863	18		(McKenzie et al., 2011)
SJM-85			2	14.85	0.2749	1.303	0.0467	0.1404	0.0043	848	39	847	21	847	24		(McKenzie et al., 2011)
SJM-86			2.34	14.47	0.3067	1.436	0.0628	0.1507	0.0058	902	44	904	26	905	32		(McKenzie et al., 2011)
SJM-87			4.14	14.87	0.1412	1.268	0.0222	0.1368	0.002	845	20	832	10	826	11		(McKenzie et al., 2011)
SJM-88			1.57	14.91	0.4607	1.301	0.0413	0.1407	0.001	840	64	846	18	848	6		(McKenzie et al., 2011)
SJM-89			2.11	15.08	0.2486	1.272	0.0424	0.1391	0.004	816	34	833	19	840	23		(McKenzie et al., 2011)
SJM-91			2.76	14.62	0.3113	1.372	0.049	0.1455	0.0042	881	44	877	21	876	23		(McKenzie et al., 2011)
SJM-92			1.66	14.53	0.2196	1.404	0.0364	0.148	0.0031	893	31	891	15	890	17		(McKenzie et al., 2011)
SJM-93			3.85	14.53	0.1326	1.461	0.0563	0.1539	0.0058	894	19	914	23	923	32		(McKenzie et al., 2011)
SJM-94			2.08	14.61	0.2348	1.398	0.0471	0.1482	0.0044	881	33	888	20	891	25		(McKenzie et al., 2011)
SJM-96			2.52	14.26	1.1258	1.364	0.1376	0.1411	0.0089	931	162	874	59	851	50		(McKenzie et al., 2011)
SJM-97			1.2	10.04	0.1975	3.775	0.1979	0.2749	0.0134	1617	37	1587	42	1565	68		(McKenzie et al., 2011)
SJM-98			1.57	14.86	0.1308	1.303	0.0435	0.1404	0.0045	847	18	847	19	847	26		(McKenzie et al., 2011)
SJM-99			2.08	14.8	0.1578	1.369	0.0506	0.147	0.0052	855	22	876	22	884	29		(McKenzie et al., 2011)
SJM-100			2.94	14.52	0.1447	1.435	0.064	0.1511	0.0066	896	21	904	27	907	37		(McKenzie et al., 2011)
SJM-103			3.52	14.74	0.0811	1.347	0.0791	0.144	0.0084	864	11	866	34	867	47		(McKenzie et al., 2011)
SJM-104			1.5	14.77	0.1379	1.295	0.0397	0.1387	0.0041	859	19	843	18	837	23		(McKenzie et al., 2011)
SJM-105			2.06	14.91	0.3238	1.307	0.0528	0.1412	0.0048	841	45	849	23	852	27		(McKenzie et al., 2011)
SJM-107			4.1	6.048	0.0277	11.17	0.462	0.49	0.0201	2511	8	2537	39	2571	87		(McKenzie et al., 2011)
SJM-108			2.22	14.55	0.3708	1.341	0.0434	0.1414	0.0028	891	53	863	19	853	16		(McKenzie et al., 2011)
SJM-109			4.14	14.26	0.435	1.416	0.0837	0.1465	0.0074	932	63	896	35	881	42		(McKenzie et al., 2011)
SJM-110			1	14.74	0.0605	1.361	0.0438	0.1455	0.0046	864	9	872	19	876	26		(McKenzie et al., 2011)
I9GS-4_4c ( basal Marwar sandstone)					±2σ (%)		±2σ (%)		±2σ (%)
I9GS-4_4c				0.11536	0.88	5.04	4.4	0.3169	4.3	1886	15.8	1826	37	1776	66		(Turner et al., 2014)
I9GS-4_5c				0.16869	0.876	10.621	4.2	0.4566	4.1	2545	14.7	2490	39	2427	83		(Turner et al., 2014)
I9GS-4_7c				0.06978	1.119	1.337	4.6	0.139	4.5	922	23	862	27	839	35		(Turner et al., 2014)
I9GS-4_11c				0.11045	0.903	4.627	4.1	0.3039	4	1807	16.4	1754	34	1712	59		(Turner et al., 2014)
I9GS-4_11r				0.11022	0.911	4.777	4.1	0.3143	4	1803	16.5	1781	34	1763	62		(Turner et al., 2014)
I9GS-4_11r.2				0.11047	0.944	4.716	4.1	0.3096	3.9	1807	17.1	1770	34	1740	60		(Turner et al., 2014)
I9GS-4_17core				0.10931	0.946	4.605	4.3	0.3055	4.2	1788	17.2	1750	36	1720	64		(Turner et al., 2014)
I9GS-4_17r				0.10887	0.912	4.441	4.1	0.2959	4	1781	16.6	1720	34	1672	59		(Turner et al., 2014)
I9GS-4_17r.2				0.10875	0.947	4.536	4.2	0.3025	4.1	1779	17.2	1737	34	1705	61		(Turner et al., 2014)
I9GS-4_23c				0.11401	0.88	5.215	4.4	0.3317	4.4	1864	15.9	1855	38	1848	70		(Turner et al., 2014)
I9GS-4_26c				0.10588	0.864	4.402	4.2	0.3016	4.1	1730	15.8	1713	35	1700	62		(Turner et al., 2014)
I9GS-4_28c				0.10837	0.868	4.541	4.3	0.3039	4.2	1772	15.8	1738	35	1712	63		(Turner et al., 2014)
I9GS-4_34c				0.10183	0.877	3.856	4.4	0.2746	4.3	1658	16.2	1604	35	1565	59		(Turner et al., 2014)
I9GS-4_36c				0.11467	0.88	5.159	4.2	0.3263	4.1	1875	15.8	1846	36	1822	65		(Turner et al., 2014)
I9GS-4_36r				0.11591	0.897	4.928	5	0.3084	4.9	1894	16.1	1807	41	1734	74		(Turner et al., 2014)
I9GS-4_40c				0.10681	1.116	4.181	5.6	0.2839	5.5	1746	20.4	1670	45	1612	78		(Turner et al., 2014)
I9GS-4_41c				0.10692	0.95	4.387	4.2	0.2976	4.1	1748	17.4	1710	34	1681	60		(Turner et al., 2014)
I9GS-4_45c				0.10586	0.886	4.418	4.1	0.3027	4	1729	16.2	1715	34	1706	60		(Turner et al., 2014)
I9GS-4_46c				0.06843	1.173	1.303	4.3	0.1382	4.1	882	24.2	847	25	835	32		(Turner et al., 2014)
I9GS-4_46r				0.06945	1.282	1.34	4.2	0.1399	4	912	26.3	863	24	845	32		(Turner et al., 2014)
I9GS-4_49c				0.19746	0.856	14.058	4.2	0.5164	4.1	2805	14	2753	39	2686	90		(Turner et al., 2014)
I9GS-4_53c				0.10624	0.874	4.346	4.3	0.2967	4.2	1736	16	1702	35	1676	61		(Turner et al., 2014)
I9GS-4_55c				0.10548	0.887	4.365	4.1	0.3002	4	1723	16.3	1706	33	1693	59		(Turner et al., 2014)
I9GS-4_56c				0.10089	0.923	3.641	4.3	0.2617	4.2	1641	17.1	1558	34	1500	56		(Turner et al., 2014)
I9GS-4_58c				0.10841	0.898	4.488	4.2	0.3002	4.1	1773	16.4	1728	35	1694	61		(Turner et al., 2014)
I9GS-4_58r				0.1082	0.891	4.483	4.2	0.3005	4.1	1769	16.3	1728	34	1695	61		(Turner et al., 2014)
I9GS-4_60c				0.18491	0.853	12.625	4	0.4952	3.9	2697	14.1	2652	37	2595	84		(Turner et al., 2014)
I9GS-4_62r				0.18296	0.796	12.287	4.6	0.487	4.5	2680	13.1	2626	42	2560	95		(Turner et al., 2014)
I9GS-4_64c				0.10567	1.004	4.287	4.8	0.2942	4.7	1726	18.4	1691	39	1664	69		(Turner et al., 2014)
I9GS-4_65c				0.12899	0.828	6.561	4.4	0.3689	4.3	2084	14.5	2054	38	2026	75		(Turner et al., 2014)
I9GS-4_67c				0.06962	1.05	1.351	4.4	0.1407	4.2	917	21.6	868	25	849	34		(Turner et al., 2014)
I9GS-4_68c				0.07296	0.904	1.603	4.2	0.1593	4.1	1013	18.3	971	26	954	37		(Turner et al., 2014)
I9GS-4_69c				0.06635	1.41	1.121	4.4	0.1225	4.1	818	29.4	763	23	745	29		(Turner et al., 2014)
I9GS-4_69r				0.06558	1.256	1.124	4.4	0.1243	4.3	793	26.3	765	24	756	30		(Turner et al., 2014)
I9GS-4_71c				0.10845	0.791	4.182	4.8	0.2796	4.7	1774	14.4	1670	39	1591	66		(Turner et al., 2014)
I9GS-4_71r				0.10895	0.803	4.225	4.4	0.2812	4.3	1782	14.6	1679	36	1599	61		(Turner et al., 2014)
I9GS-4_74c				0.10786	0.959	4.138	4.9	0.2782	4.8	1764	17.5	1662	40	1584	67		(Turner et al., 2014)
I9GS-4_76c				0.0701	1.572	1.34	5.1	0.1386	4.8	931	32.2	863	29	838	38		(Turner et al., 2014)
I9GS-4_78c				0.10606	0.952	4.404	4.4	0.3011	4.2	1733	17.4	1713	36	1698	63		(Turner et al., 2014)
I9GS-4_85c				0.10562	0.908	4.303	4.3	0.2955	4.2	1725	16.6	1694	35	1670	62		(Turner et al., 2014)
I9GS-4_86c				0.11516	0.862	4.893	4.8	0.3081	4.7	1882	15.5	1801	40	1733	71		(Turner et al., 2014)
I9GS-4_88c				0.06936	1.475	1.381	4.6	0.1444	4.4	909	30.3	881	27	870	35		(Turner et al., 2014)
I9GS-4_90c				0.19321	0.799	13.422	4.4	0.5038	4.3	2770	13.1	2709	41	2632	92		(Turner et al., 2014)
I9GS-4_90r				0.19009	0.829	13.109	4.5	0.5002	4.4	2743	13.6	2687	42	2617	95		(Turner et al., 2014)
I9GS-4_92c				0.14722	0.817	8.422	4.5	0.4149	4.5	2314	14	2277	41	2239	84		(Turner et al., 2014)
I9GS-4_93c				0.14733	0.798	8.513	4.3	0.4191	4.3	2315	13.7	2287	39	2258	81		(Turner et al., 2014)
I9GS-4_94c				0.07429	0.932	1.639	4.4	0.16	4.3	1049	18.8	985	28	958	38		(Turner et al., 2014)
I9GS-4_95c				0.10914	1.268	4.289	4.7	0.2851	4.5	1785	23.1	1691	38	1618	65		(Turner et al., 2014)
2011GS19 ( basal Marwar sandstone)
2011GS19_1c				0.10454	1.017	4.366	5.1	0.3029	5	1706	18.7	1706	42	1707	75		(Turner et al., 2014)
2011GS19_1r				0.10415	0.992	4.42	5.1	0.3078	5	1699	18.2	1716	42	1731	76		(Turner et al., 2014)
2011GS19_3c				0.06601	1.036	1.242	5.1	0.1364	5	807	21.7	819	29	825	39		(Turner et al., 2014)
2011GS19_4c				0.0664	1.048	1.208	5.3	0.1319	5.2	819	21.9	804	29	800	39		(Turner et al., 2014)
2011GS19_11c				0.11826	2.324	5.177	5.7	0.3175	5.3	1930	41.6	1849	48	1779	81		(Turner et al., 2014)
2011GS19_12c				0.16542	0.991	10.899	4.8	0.4779	4.7	2512	16.6	2514	44	2520	97		(Turner et al., 2014)
2011GS19_25c				0.10793	0.984	4.774	6.3	0.3208	6.2	1765	18	1780	52	1795	97		(Turner et al., 2014)
2011GS19_25r				0.10879	1.049	4.3	7.4	0.2867	7.3	1779	19.1	1693	60	1626	104		(Turner et al., 2014)
2011GS19_47r				0.10506	0.972	4.317	6.3	0.298	6.2	1715	17.8	1696	51	1683	91		(Turner et al., 2014)
2011GS19_47r.2				0.10492	0.981	4.201	5.2	0.2904	5.1	1713	18	1674	42	1645	74		(Turner et al., 2014)
2011GS19_47r.3				0.10463	0.968	4.737	4.4	0.3284	4.3	1708	17.8	1774	37	1832	69		(Turner et al., 2014)
2011GS19_47r.4				0.11744	4.899	5.135	8	0.3171	6.4	1918	87.7	1842	67	1777	99		(Turner et al., 2014)
2011GS19_47c				0.1043	0.962	4.444	4.5	0.309	4.4	1702	17.7	1720	37	1737	67		(Turner et al., 2014)
2011GS19_51c				0.23909	3.288	18.292	5.3	0.5549	4.1	3114	52.3	3005	50	2848	94		(Turner et al., 2014)
2011GS19_63r				0.1107	0.946	4.73	4.7	0.3099	4.6	1811	17.2	1772	39	1742	70		(Turner et al., 2014)
2011GS19_63c				0.11003	0.667	4.909	5.1	0.3236	5	1800	12.1	1803	42	1809	79		(Turner et al., 2014)
2011GS19_63c.2				0.10986	0.626	5.075	5.3	0.335	5.3	1797	11.4	1832	45	1864	85		(Turner et al., 2014)
2011GS19_63r				0.10938	0.938	4.816	4.2	0.3193	4.1	1789	17.1	1787	35	1788	64		(Turner et al., 2014)
2011GS19_63r				0.10977	0.541	4.796	4.2	0.3169	4.1	1796	9.8	1784	35	1776	64		(Turner et al., 2014)
2011GS19_63r				0.10964	0.614	4.643	7.5	0.3072	7.4	1793	11.2	1757	61	1728	112		(Turner et al., 2014)
2011GS19_86c				0.26033	1.065	23.847	6.4	0.6644	6.3	3249	16.7	3262	61	3287	161		(Turner et al., 2014)
2011GS19_87r				0.25171	0.823	20.212	12.9	0.5824	12.8	3196	13	3101	121	2961	302		(Turner et al., 2014)
2011GS19_92c				0.69766	5.129	90.326	34.5	0.939	34.1	4600	80.8	4583	320	4272	1025		(Turner et al., 2014)
2011GS19_95r				0.16225	0.674	9.818	9.2	0.4389	9.2	2479	11.3	2417	83	2348	180		(Turner et al., 2014)
2011GS19_95c				0.16125	0.505	10.282	5.5	0.4625	5.5	2469	8.5	2460	50	2452	111		(Turner et al., 2014)
2011GS19_95c.2				0.16157	0.498	10.504	4.5	0.4715	4.5	2472	8.4	2480	41	2492	92		(Turner et al., 2014)
2011GS19_95r				0.16236	0.693	10.127	5.6	0.4524	5.6	2480	11.7	2446	51	2408	111		(Turner et al., 2014)
2011GS19_95r				0.16039	0.483	10.006	3.7	0.4525	3.6	2460	8.1	2435	34	2408	73		(Turner et al., 2014)
2011GS19_99c				0.06683	0.77	1.274	4.7	0.1382	4.6	832	16	834	26	835	36		(Turner et al., 2014)
2011G19_107c				0.07597	2.199	1.763	5.1	0.1683	4.6	1094	44	1032	33	1004	43		(Turner et al., 2014)
2011G19_110c				0.06484	0.734	1.061	4.9	0.1187	4.8	769	15.4	734	25	724	33		(Turner et al., 2014)
2011GS19_114r				0.07278	0.948	1.66	4.9	0.1655	4.8	1008	19.2	993	31	988	44		(Turner et al., 2014)
2011GS19_114r.2				0.07479	2.068	1.693	5.9	0.1642	5.5	1063	41.5	1006	37	981	50		(Turner et al., 2014)
2011GS19_118c				0.06527	0.612	1.136	5.7	0.1262	5.7	783	12.8	770	30	767	41		(Turner et al., 2014)
2011GS19_120c				0.10993	1.553	4.38	8.2	0.2889	8	1798	28.2	1708	66	1638	116		(Turner et al., 2014)
2011GS19_120r				0.11011	1.433	4.75	5.5	0.3129	5.4	1801	26	1776	46	1756	82		(Turner et al., 2014)
2011GS19_130r				0.10153	2.846	3.713	8.2	0.2652	7.7	1652	52.7	1574	65	1518	104		(Turner et al., 2014)
2011GS19_130c				0.10911	1.905	4.333	5.8	0.288	5.5	1785	34.7	1699	47	1633	79		(Turner et al., 2014)
2011GS19_133c				0.10633	1.528	4.559	6.8	0.311	6.6	1738	28	1742	56	1747	101		(Turner et al., 2014)
2011GS19_142c				0.11572	1.506	5.391	6.2	0.3379	6	1891	27.1	1883	53	1878	98		(Turner et al., 2014)
2011GS19_175c				0.10942	1.403	5.095	5.6	0.3377	5.5	1790	25.5	1835	47	1877	89		(Turner et al., 2014)
2011GS19_175r				0.10985	1.503	4.656	6.9	0.3074	6.8	1797	27.3	1759	57	1729	102		(Turner et al., 2014)
2011GS19_175c				0.1092	1.394	5.118	5.4	0.3399	5.3	1786	25.4	1839	46	1888	86		(Turner et al., 2014)
2011GS19_184c				0.23859	239.672	22.357	339.2	0.6796	240	3111	3810.5	3199	1958	3346	5107		(Turner et al., 2014)
2011GS19_185c				0.25197	239.672	24.772	339.1	0.7131	239.9	3197	3784.1	3299	1963	3473	5225		(Turner et al., 2014)
2011GS19_186c				0.25424	239.671	25.496	339.1	0.7273	239.9	3211	3780.3	3327	1965	3526	5275		(Turner et al., 2014)
G113 (Cryogenian Jodhpur Group)
G113-4c				0.06935	5.491	1.356	7.2	0.1419	4.6	909	112.9	870	42	856	37		(Turner et al., 2014)
G113-14c				0.06912	5.753	1.336	7.5	0.1401	4.8	902	118.5	861	43	846	38		(Turner et al., 2014)
G113-18c				0.06792	5.552	1.312	6.8	0.1401	4	866	115	851	39	846	32		(Turner et al., 2014)
G113-23c				0.10279	5.533	4.362	7	0.3078	4.3	1675	102.1	1705	57	1731	65		(Turner et al., 2014)
G113-27c				0.10449	5.483	4.584	6.8	0.3182	4.1	1705	100.8	1746	56	1782	63		(Turner et al., 2014)
G113-48c				0.07287	5.709	1.604	7.3	0.1596	4.6	1010	115.6	972	45	956	41		(Turner et al., 2014)
G113-52c				0.11044	5.493	4.779	7.5	0.3138	5.1	1807	99.7	1781	62	1761	79		(Turner et al., 2014)
G113-58c				0.06774	6.039	1.309	7.5	0.1401	4.5	861	125.2	850	43	846	35		(Turner et al., 2014)
G113-61c				0.06763	5.921	1.261	9.4	0.1352	7.3	857	122.8	828	53	818	56		(Turner et al., 2014)
G113-69c				0.06825	6.241	1.419	10.1	0.1508	7.9	876	129	897	59	906	67		(Turner et al., 2014)
G113-71c				0.10569	5.862	4.892	9.2	0.3357	7.1	1726	107.5	1801	76	1867	115		(Turner et al., 2014)
G113-72c				0.06819	8.333	1.349	11.1	0.1435	7.4	874	172.3	867	64	865	60		(Turner et al., 2014)
G113-79c				0.07281	6.535	1.556	10.5	0.155	8.2	1009	132.4	953	64	930	71		(Turner et al., 2014)
Precambrian Tanawal Foramtion
2015T1-002				0.06803	0.00304	1.21847	0.05361	0.12992	0.00192	869	67	809	25	787	11		(Qasim et al., 2017)
2015T1-003				0.06903	0.00091	1.25327	0.01675	0.1317	0.00139	900	13	825	8	798	8		(Qasim et al., 2017)
2015T1-004				0.06809	0.00136	1.2949	0.02576	0.13796	0.00156	871	23	843	11	833	9		(Qasim et al., 2017)
2015T1-005				0.06415	0.00243	1.12898	0.04213	0.12766	0.00174	747	56	767	20	775	10		(Qasim et al., 2017)
2015T1-006				0.06678	0.00151	1.18131	0.02344	0.12829	0.00139	831	48	792	11	778	8		(Qasim et al., 2017)
2015T1-007				0.10949	0.00314	4.65771	0.12005	0.30852	0.00385	1791	53	1760	22	1733	19		(Qasim et al., 2017)
2015T1-008				0.06955	0.00147	1.35542	0.02838	0.14138	0.00163	915	25	870	12	852	9		(Qasim et al., 2017)
2015T1-009				0.06619	0.00198	1.22324	0.03605	0.13406	0.00172	812	40	811	16	811	10		(Qasim et al., 2017)
2015T1-010				0.11147	0.00151	5.17087	0.0712	0.3365	0.00368	1824	11	1848	12	1870	18		(Qasim et al., 2017)
2015T1-011				0.06914	0.00132	1.23009	0.02333	0.12907	0.00145	903	21	814	11	783	8		(Qasim et al., 2017)
2015T1-012				0.06815	0.00143	1.26633	0.02635	0.13478	0.00154	873	25	831	12	815	9		(Qasim et al., 2017)
2015T1-013				0.06621	0.00138	1.07611	0.01916	0.11787	0.00126	813	44	742	9	718	7		(Qasim et al., 2017)
2015T1-014				0.06586	0.00145	1.19597	0.02298	0.13169	0.00143	802	47	799	11	798	8		(Qasim et al., 2017)
2015T1-015				0.06806	0.00121	1.19309	0.02114	0.12717	0.00141	870	19	797	10	772	8		(Qasim et al., 2017)
2015T1-016				0.06856	0.00198	1.24657	0.0329	0.13188	0.00157	885	61	822	15	799	9		(Qasim et al., 2017)
2015T1-017				0.0703	0.00117	1.34064	0.02235	0.13834	0.00152	937	17	864	10	835	9		(Qasim et al., 2017)
2015T1-018				0.06847	0.00092	1.14048	0.01557	0.12083	0.00129	883	13	773	7	735	7		(Qasim et al., 2017)
2015T1-021				0.06719	0.0017	1.21352	0.02748	0.131	0.00146	844	54	807	13	794	8		(Qasim et al., 2017)
2015T1-022				0.0678	0.00135	1.3555	0.02694	0.14504	0.00165	862	23	870	12	873	9		(Qasim et al., 2017)
2015T1-023				0.06926	0.00088	1.09979	0.01417	0.11519	0.00122	906	12	753	7	703	7		(Qasim et al., 2017)
2015T1-024				0.15891	0.00373	9.8521	0.19767	0.44965	0.00549	2444	41	2421	18	2394	24		(Qasim et al., 2017)
2015T1-025				0.06669	0.00196	1.17949	0.03177	0.12827	0.00153	828	63	791	15	778	9		(Qasim et al., 2017)
2015T1-026				0.06759	0.00175	1.22303	0.02842	0.13123	0.00148	856	55	811	13	795	8		(Qasim et al., 2017)
2015T1-027				0.09539	0.00144	3.41388	0.05206	0.25962	0.00288	1536	14	1508	12	1488	15		(Qasim et al., 2017)
2015T1-029				0.08098	0.00291	2.34127	0.08358	0.20973	0.00269	1221	50	1225	25	1227	14		(Qasim et al., 2017)
2015T1-31				0.06771	0.00107	1.16336	0.01839	0.12463	0.00136	860	16	784	9	757	8		(Qasim et al., 2017)
2015T1-33				0.06878	0.00138	1.31341	0.0263	0.13852	0.00158	892	23	852	12	836	9		(Qasim et al., 2017)
2015T1-34				0.15132	0.00172	8.49132	0.09961	0.40705	0.00434	2361	9	2285	11	2201	20		(Qasim et al., 2017)
2015T1-35				0.06895	0.00117	1.30273	0.02214	0.13707	0.00152	897	18	847	10	828	9		(Qasim et al., 2017)
2015T1-37				0.06738	0.00196	1.22784	0.03533	0.13218	0.00167	850	39	813	16	800	10		(Qasim et al., 2017)
2015T1-38				0.06854	0.00101	1.18736	0.01765	0.12566	0.00136	885	15	795	8	763	8		(Qasim et al., 2017)
2015T1-39				0.10982	0.00344	4.79581	0.13566	0.31674	0.00424	1796	58	1784	24	1774	21		(Qasim et al., 2017)
2015T1-40				0.06961	0.00142	1.28734	0.02615	0.13416	0.00154	917	24	840	12	812	9		(Qasim et al., 2017)
2015T1-041				0.06804	0.00171	1.27342	0.02855	0.13575	0.00154	870	53	834	13	821	9		(Qasim et al., 2017)
2015T1-042				0.06821	0.00119	1.15244	0.02005	0.12256	0.00136	875	19	778	9	745	8		(Qasim et al., 2017)
2015T1-043				0.1144	0.00179	5.28579	0.08334	0.33519	0.00378	1870	14	1867	13	1863	18		(Qasim et al., 2017)
2015T1-044				0.06816	0.00169	1.3094	0.03216	0.13936	0.00169	873	31	850	14	841	10		(Qasim et al., 2017)
2015T1-045				0.06724	0.00145	1.28534	0.02757	0.13867	0.00161	845	26	839	12	837	9		(Qasim et al., 2017)
2015T1-046				0.06694	0.00207	1.17836	0.03587	0.1277	0.00164	836	42	791	17	775	9		(Qasim et al., 2017)
2015T1-047				0.11415	0.0021	4.9679	0.09157	0.31572	0.00381	1867	17	1814	16	1769	19		(Qasim et al., 2017)
2015T1-048				0.06699	0.0011	1.21179	0.02003	0.13122	0.00144	837	17	806	9	795	8		(Qasim et al., 2017)
2015T1-049				0.07047	0.00256	1.34907	0.04578	0.13885	0.00179	942	76	867	20	838	10		(Qasim et al., 2017)
2015T1-051				0.06804	0.00192	1.22419	0.03409	0.13052	0.00164	870	37	812	16	791	9		(Qasim et al., 2017)
2015T1-052				0.10579	0.00187	4.41342	0.06227	0.30258	0.00325	1728	33	1715	12	1704	16		(Qasim et al., 2017)
2015T1-053				0.13552	0.00188	7.08466	0.09975	0.37926	0.00427	2171	11	2122	13	2073	20		(Qasim et al., 2017)
2015T1-054				0.0678	0.0019	1.34024	0.03708	0.14341	0.0018	862	37	863	16	864	10		(Qasim et al., 2017)
2015T1-055				0.11268	0.00174	4.82023	0.07504	0.31034	0.00354	1843	13	1788	13	1742	17		(Qasim et al., 2017)
2015T1-056				0.06344	0.00113	1.0078	0.01798	0.11525	0.00127	723	20	708	9	703	7		(Qasim et al., 2017)
2015T1-057				0.14619	0.0033	8.3779	0.15974	0.41563	0.00504	2302	40	2273	17	2241	23		(Qasim et al., 2017)
2015T1-058				0.13769	0.00282	7.43364	0.15211	0.39168	0.00513	2198	18	2165	18	2131	24		(Qasim et al., 2017)
2015T1-059				0.12718	0.00211	6.51934	0.08312	0.37176	0.00395	2059	30	2049	11	2038	19		(Qasim et al., 2017)
2015T1-060				0.16672	0.00368	10.9439	0.20217	0.47607	0.00575	2525	38	2518	17	2510	25		(Qasim et al., 2017)
2015T1-061				0.06702	0.00171	1.29227	0.02965	0.13984	0.00157	838	54	842	13	844	9		(Qasim et al., 2017)
2015T1-062				0.06872	0.00122	1.27502	0.0227	0.1346	0.00151	890	19	835	10	814	9		(Qasim et al., 2017)
2015T1-063				0.06779	0.00194	1.33315	0.03489	0.14264	0.00167	862	61	860	15	860	9		(Qasim et al., 2017)
2015T1-064				0.06815	0.00134	1.22613	0.024	0.13052	0.00149	873	22	813	11	791	8		(Qasim et al., 2017)
2015T1-065				0.11344	0.00186	4.903	0.08091	0.31356	0.00365	1855	15	1803	14	1758	18		(Qasim et al., 2017)
2015T1-066				0.11043	0.00258	4.84179	0.09778	0.318	0.00372	1806	43	1792	17	1780	18		(Qasim et al., 2017)
2015T1-067				0.11384	0.00299	5.15777	0.13461	0.3287	0.00461	1862	27	1846	22	1832	22		(Qasim et al., 2017)
2015T1-068				0.06864	0.00207	1.35881	0.04039	0.14362	0.00184	888	40	871	17	865	10		(Qasim et al., 2017)
2015T1-069				0.113	0.00263	5.17152	0.10382	0.33193	0.00392	1848	43	1848	17	1848	19		(Qasim et al., 2017)
2015T1-070				0.06786	0.00175	1.3072	0.03334	0.13975	0.00171	864	33	849	15	843	10		(Qasim et al., 2017)
2015T1-071				0.07021	0.00244	1.50866	0.04886	0.15585	0.00196	934	73	934	20	934	11		(Qasim et al., 2017)
2015T1-072				0.09898	0.00194	3.57909	0.06991	0.26233	0.00316	1605	19	1545	16	1502	16		(Qasim et al., 2017)
2015T1-073				0.06689	0.00124	1.13725	0.0211	0.12335	0.00139	834	21	771	10	750	8		(Qasim et al., 2017)
2015T1-074				0.06943	0.00128	1.27669	0.02347	0.13341	0.00151	912	20	835	10	807	9		(Qasim et al., 2017)
2015T1-075				0.06887	0.0013	1.2256	0.02308	0.12912	0.00147	895	21	812	11	783	8		(Qasim et al., 2017)
2015T1-076				0.11033	0.003	4.82704	0.11675	0.31733	0.00393	1805	51	1790	20	1777	19		(Qasim et al., 2017)
2015T1-077				0.1133	0.00139	4.86643	0.06148	0.31163	0.00338	1853	10	1796	11	1749	17		(Qasim et al., 2017)
2015T1-078				0.06748	0.0011	1.30706	0.02144	0.14053	0.00155	853	17	849	9	848	9		(Qasim et al., 2017)
2015T1-079				0.06693	0.00117	1.18452	0.02081	0.1284	0.00144	836	19	793	10	779	8		(Qasim et al., 2017)
2015T1-080				0.06867	0.0011	1.22741	0.01978	0.12968	0.00143	889	17	813	9	786	8		(Qasim et al., 2017)
2015T1-081				0.10673	0.00207	4.26672	0.08255	0.29005	0.00353	1744	19	1687	16	1642	18		(Qasim et al., 2017)
2015T1-082				0.06887	0.00125	1.21315	0.02204	0.12781	0.00144	895	20	807	10	775	8		(Qasim et al., 2017)
2015T1-083				0.18553	0.00272	13.2122	0.198	0.5167	0.0062	2703	11	2695	14	2685	26		(Qasim et al., 2017)
2015T1-084				0.06666	0.00122	1.35167	0.02476	0.14712	0.00166	827	20	868	11	885	9		(Qasim et al., 2017)
2015T1-085				0.06827	0.00111	1.29632	0.02122	0.13777	0.00153	877	17	844	9	832	9		(Qasim et al., 2017)
2015T1-086				0.07027	0.00167	1.47566	0.03479	0.15237	0.00183	936	29	920	14	914	10		(Qasim et al., 2017)
2015T1-087				0.09996	0.00251	3.92717	0.09764	0.28507	0.00382	1623	27	1619	20	1617	19		(Qasim et al., 2017)
2015T1-088				0.11332	0.00185	4.92183	0.08079	0.31514	0.00368	1853	14	1806	14	1766	18		(Qasim et al., 2017)
2015T1-089				0.06765	0.00148	1.30349	0.02843	0.13981	0.00164	858	26	847	13	844	9		(Qasim et al., 2017)
2015T1-090				0.10986	0.002	4.58214	0.0834	0.30264	0.00363	1797	17	1746	15	1704	18		(Qasim et al., 2017)
2015T1-091				0.07041	0.00125	1.39397	0.02483	0.14366	0.00162	940	19	886	11	865	9		(Qasim et al., 2017)
2015T1-092				0.06767	0.00098	1.26949	0.0186	0.13612	0.00148	858	14	832	8	823	8		(Qasim et al., 2017)
2015T1-093				0.07347	0.00236	1.40388	0.04447	0.13865	0.00188	1027	42	891	19	837	11		(Qasim et al., 2017)
2015T1-094				0.11272	0.0019	4.89071	0.08298	0.31484	0.00371	1844	15	1801	14	1764	18		(Qasim et al., 2017)
2015T1-095				0.06883	0.0012	1.26339	0.02217	0.1332	0.0015	894	19	829	10	806	9		(Qasim et al., 2017)
2015T1-097				0.06608	0.00138	1.35115	0.02806	0.14837	0.00173	809	25	868	12	892	10		(Qasim et al., 2017)
2015T1-098				0.12791	0.00158	6.46929	0.08206	0.36703	0.00403	2069	10	2042	11	2015	19		(Qasim et al., 2017)
2015T1-099				0.06863	0.00195	1.30262	0.03661	0.13773	0.00175	888	37	847	16	832	10		(Qasim et al., 2017)
2015T1-100				0.07015	0.00176	1.32992	0.03313	0.13758	0.00168	933	31	859	14	831	10		(Qasim et al., 2017)
2015A2 (Precambrian Hazara Formation)
2015A2-001				0.06983	0.0019	1.33429	0.03599	0.13863	0.00179	923	34	861	16	837	10		(Qasim et al., 2017)
2015A2-002				0.0654	0.00206	1.1991	0.03491	0.13299	0.00162	787	68	800	16	805	9		(Qasim et al., 2017)
2015A2-003				0.06724	0.00145	1.3144	0.02832	0.14181	0.0017	845	25	852	12	855	10		(Qasim et al., 2017)
2015A2-004				0.1511	0.00214	8.38202	0.12254	0.40243	0.00477	2358	11	2273	13	2180	22		(Qasim et al., 2017)
2015A2-006				0.06675	0.00238	1.30913	0.04611	0.14229	0.00198	830	50	850	20	858	11		(Qasim et al., 2017)
2015A2-007				0.06573	0.00164	1.23846	0.03082	0.13669	0.00169	798	32	818	14	826	10		(Qasim et al., 2017)
2015A2-009				0.0666	0.00133	1.24108	0.02485	0.1352	0.00159	825	23	819	11	817	9		(Qasim et al., 2017)
2015A2-010				0.06919	0.0017	1.2008	0.02943	0.1259	0.00153	904	31	801	14	764	9		(Qasim et al., 2017)
2015A2-011				0.06875	0.00172	1.25815	0.03141	0.13277	0.00166	891	31	827	14	804	9		(Qasim et al., 2017)
2015A2-013				0.06706	0.00179	1.22764	0.03251	0.13282	0.00168	840	34	813	15	804	10		(Qasim et al., 2017)
2015A2-014				0.06593	0.00155	1.23947	0.0291	0.13639	0.00166	804	29	819	13	824	9		(Qasim et al., 2017)
2015A2-015				0.06536	0.00136	1.26699	0.02655	0.14063	0.00167	786	25	831	12	848	9		(Qasim et al., 2017)
2015A2-016				0.06824	0.00159	1.23606	0.02874	0.13141	0.00162	876	28	817	13	796	9		(Qasim et al., 2017)
2015A2-017				0.14306	0.00251	8.23355	0.14698	0.41754	0.00525	2265	15	2257	16	2249	24		(Qasim et al., 2017)
2015A2-018				0.06613	0.00204	1.15877	0.03548	0.12712	0.00166	810	42	781	17	771	9		(Qasim et al., 2017)
2015A2-019				0.09281	0.00196	3.28685	0.0696	0.25692	0.00325	1484	22	1478	16	1474	17		(Qasim et al., 2017)
2015A2-020				0.06748	0.00149	1.34091	0.02955	0.14416	0.00174	853	26	864	13	868	10		(Qasim et al., 2017)
2015A2-021				0.06745	0.00227	1.3633	0.04525	0.14662	0.00204	852	46	873	19	882	11		(Qasim et al., 2017)
2015A2-022				0.07005	0.00234	1.49208	0.04914	0.15452	0.00217	930	45	927	20	926	12		(Qasim et al., 2017)
2015A2-023				0.07662	0.00178	1.58549	0.03665	0.15012	0.00185	1111	27	965	14	902	10		(Qasim et al., 2017)
2015A2-024				0.11242	0.00223	5.25796	0.10511	0.33931	0.00435	1839	19	1862	17	1883	21		(Qasim et al., 2017)
2015A2-025				0.07157	0.00205	1.53561	0.04363	0.15565	0.00207	974	36	945	17	933	12		(Qasim et al., 2017)
2015A2-026				0.11599	0.00173	5.47532	0.0838	0.34245	0.00402	1895	13	1897	13	1898	19		(Qasim et al., 2017)
2015A2-027				0.07265	0.00234	1.53696	0.0489	0.15348	0.00212	1004	42	945	20	920	12		(Qasim et al., 2017)
2015A2-029				0.1383	0.00239	7.73669	0.13605	0.40586	0.00511	2206	15	2201	16	2196	23		(Qasim et al., 2017)
2015A2-030				0.06742	0.00222	1.33085	0.04048	0.14317	0.00182	851	70	859	18	863	10		(Qasim et al., 2017)
2015A2-31				0.06827	0.00196	1.42657	0.04067	0.1516	0.00199	877	37	900	17	910	11		(Qasim et al., 2017)
2015A2-32				0.065	0.00245	1.11184	0.04156	0.12409	0.0017	774	55	759	20	754	10		(Qasim et al., 2017)
2015A2-34				0.0708	0.0016	1.49093	0.03371	0.15278	0.00188	952	27	927	14	917	11		(Qasim et al., 2017)
2015A2-35				0.06952	0.00159	1.39552	0.03185	0.14564	0.00179	914	27	887	14	876	10		(Qasim et al., 2017)
2015A2-37				0.10538	0.00184	4.42116	0.07839	0.30438	0.00369	1721	16	1716	15	1713	18		(Qasim et al., 2017)
2015A2-38				0.0672	0.00227	1.31404	0.04399	0.14185	0.00192	844	47	852	19	855	11		(Qasim et al., 2017)
2015A2-39				0.06752	0.00204	1.33702	0.03992	0.14366	0.00191	854	40	862	17	865	11		(Qasim et al., 2017)
2015A2-40				0.06873	0.00175	1.40877	0.03579	0.14871	0.00186	891	32	893	15	894	10		(Qasim et al., 2017)
2015A2-041				0.12913	0.00481	6.60486	0.24473	0.3711	0.00608	2086	42	2060	33	2035	29		(Qasim et al., 2017)
2015A2-042				0.06767	0.00303	1.29549	0.05727	0.13889	0.00214	858	66	844	25	838	12		(Qasim et al., 2017)
2015A2-043				0.06739	0.00217	1.34408	0.04291	0.1447	0.00193	850	44	865	19	871	11		(Qasim et al., 2017)
2015A2-045				0.0698	0.00259	1.42407	0.05226	0.14803	0.00209	922	52	899	22	890	12		(Qasim et al., 2017)
2015A2-046				0.07147	0.00155	1.41603	0.03063	0.14374	0.00173	971	25	896	13	866	10		(Qasim et al., 2017)
2015A2-047				0.06654	0.00186	1.21252	0.03392	0.13221	0.0016	823	38	806	16	800	9		(Qasim et al., 2017)
2015A2-048				0.06771	0.00266	1.35449	0.05283	0.14514	0.00193	860	59	869	23	874	11		(Qasim et al., 2017)
2015A2-049				0.0653	0.00146	1.33603	0.02978	0.14844	0.00179	784	27	862	13	892	10		(Qasim et al., 2017)
2015A2-050				0.19247	0.00344	14.3232	0.26232	0.5399	0.00731	2763	14	2771	17	2783	31		(Qasim et al., 2017)
2015A2-051				0.06823	0.00169	1.38903	0.03435	0.14771	0.00183	876	31	884	15	888	10		(Qasim et al., 2017)
2015A2-052				0.11502	0.00173	5.05283	0.07797	0.31872	0.00373	1880	13	1828	13	1783	18		(Qasim et al., 2017)
2015A2-053				0.06543	0.00156	1.31102	0.03115	0.14536	0.00177	788	30	851	14	875	10		(Qasim et al., 2017)
2015A2-054				0.06699	0.00148	1.31526	0.02905	0.14245	0.00171	837	27	852	13	859	10		(Qasim et al., 2017)
2015A2-055				0.06872	0.00172	1.39427	0.03484	0.14721	0.00183	890	31	887	15	885	10		(Qasim et al., 2017)
2015A2-057				0.16475	0.00225	11.0357	0.15687	0.48599	0.00573	2505	11	2526	13	2553	25		(Qasim et al., 2017)
2015A2-058				0.07205	0.00286	1.48987	0.05837	0.15002	0.00222	987	55	926	24	901	12		(Qasim et al., 2017)
2015A2-059				0.06662	0.0014	1.31069	0.02757	0.14274	0.00169	826	25	850	12	860	10		(Qasim et al., 2017)
2015A2-062				0.06816	0.00128	1.35985	0.02571	0.14475	0.00168	873	21	872	11	871	9		(Qasim et al., 2017)
2015A2-063				0.06496	0.00162	1.14591	0.02859	0.12799	0.00154	773	32	775	14	776	9		(Qasim et al., 2017)
2015A2-065				0.06513	0.0014	1.14493	0.02481	0.12754	0.00147	779	27	775	12	774	8		(Qasim et al., 2017)
2015A2-066				0.06635	0.0013	1.24198	0.02453	0.13582	0.00159	817	23	820	11	821	9		(Qasim et al., 2017)
2015A2-068				0.11735	0.00152	5.49659	0.07417	0.33984	0.00384	1916	11	1900	12	1886	18		(Qasim et al., 2017)
2015A2-069				0.06753	0.00108	1.31519	0.02134	0.1413	0.0016	854	17	852	9	852	9		(Qasim et al., 2017)
2015A2-070				0.06953	0.00276	1.31187	0.05133	0.1369	0.00198	915	57	851	23	827	11		(Qasim et al., 2017)
2015A2-071				0.10647	0.00169	4.22747	0.06849	0.2881	0.00337	1740	14	1679	13	1632	17		(Qasim et al., 2017)
2015A2-072				0.06902	0.00149	1.2606	0.02715	0.13253	0.00158	899	25	828	12	802	9		(Qasim et al., 2017)
2015A2-073				0.06678	0.00207	1.25829	0.03578	0.13665	0.00166	831	66	827	16	826	9		(Qasim et al., 2017)
2015A2-074				0.09804	0.00153	3.68946	0.05873	0.27304	0.00317	1587	14	1569	13	1556	16		(Qasim et al., 2017)
2015A2-075				0.06508	0.00253	1.12744	0.04358	0.1257	0.00162	777	59	767	21	763	9		(Qasim et al., 2017)
2015A2-076				0.11981	0.00213	5.99717	0.10789	0.36319	0.00448	1953	16	1975	16	1997	21		(Qasim et al., 2017)
2015A2-077				0.06711	0.00155	1.30172	0.02992	0.14073	0.0017	841	28	846	13	849	10		(Qasim et al., 2017)
2015A2-078				0.06831	0.00119	1.36807	0.0241	0.14531	0.00167	878	19	875	10	875	9		(Qasim et al., 2017)
2015A2-080				0.11294	0.00188	5.32719	0.09008	0.34225	0.0041	1847	15	1873	14	1897	20		(Qasim et al., 2017)
2015A2-082				0.06697	0.00221	1.32243	0.04319	0.14327	0.00192	837	46	856	19	863	11		(Qasim et al., 2017)
2015A2-083				0.07123	0.0022	1.30484	0.03979	0.13292	0.0018	964	40	848	18	805	10		(Qasim et al., 2017)
2015A2-084				0.07241	0.00193	1.46559	0.03868	0.14686	0.00187	997	33	916	16	883	11		(Qasim et al., 2017)
2015A2-085				0.10836	0.00299	4.58504	0.1257	0.30702	0.00439	1772	30	1747	23	1726	22		(Qasim et al., 2017)
2015A2-086				0.07432	0.00276	1.53609	0.05629	0.14997	0.00217	1050	50	945	23	901	12		(Qasim et al., 2017)
2015A2-087				0.06804	0.00302	1.36605	0.05997	0.14567	0.00213	870	67	874	26	877	12		(Qasim et al., 2017)
2015A2-088				0.14104	0.00249	8.15739	0.14618	0.41965	0.00529	2240	15	2249	16	2259	24		(Qasim et al., 2017)
2015A2-089				0.06723	0.00199	1.38541	0.04062	0.14952	0.00194	845	39	883	17	898	11		(Qasim et al., 2017)
2015A2-090				0.06714	0.00254	1.16535	0.04351	0.12594	0.00175	842	54	784	20	765	10		(Qasim et al., 2017)
2015A2-091				0.06888	0.00187	1.37696	0.0371	0.14506	0.0018	895	35	879	16	873	10		(Qasim et al., 2017)
2015A2-092				0.06856	0.00218	1.4101	0.04141	0.14916	0.00181	886	67	893	17	896	10		(Qasim et al., 2017)
2015A2-093				0.06996	0.00236	1.22019	0.04064	0.12655	0.00172	927	46	810	19	768	10		(Qasim et al., 2017)
2015A2-094				0.06769	0.00507	1.32846	0.0986	0.14241	0.00247	859	126	858	43	858	14		(Qasim et al., 2017)
2015A2-095				0.11083	0.00211	4.65231	0.08915	0.30458	0.00379	1813	18	1759	16	1714	19		(Qasim et al., 2017)
2015A2-097				0.258	0.00451	22.7439	0.41203	0.63967	0.00911	3235	13	3216	18	3188	36		(Qasim et al., 2017)
2015A2-098				0.07222	0.00264	1.57321	0.05679	0.15807	0.00228	992	50	960	22	946	13		(Qasim et al., 2017)
LHW 16 (Ediacaran Krol Formation)
LHW16-01			1.22	0.1039	0.0006	4.35	0.0315	0.3009	0.0014	1696	12	1702	6	1695	7		(Wang et al., 2020)
LHW16-02			1.15	0.0987	0.0008	3.818	0.033	0.2789	0.0013	1594	16	1595	7	1586	7		(Wang et al., 2020)
LHW16-03			0.72	0.1681	0.0017	10.91	0.115	0.4678	0.0018	2532	16	2513	9	2473	8		(Wang et al., 2020)
LHW16-04			2.52	0.1188	0.0038	3.59	0.105	0.2212	0.0012	1900	50	1543	24	1288	7		(Wang et al., 2020)
LHW16-05			1.94	0.0667	0.0011	1.202	0.018	0.1302	0.0008	806	34	800	8	789	5		(Wang et al., 2020)
LHW16-06			0.73	0.1425	0.0038	6.14	0.185	0.3104	0.0019	2219	42	1978	24	1742	9		(Wang et al., 2020)
LHW16-07			3.75	0.1616	0.0039	7.15	0.175	0.3233	0.0026	2473	44	2151	28	1805	13		(Wang et al., 2020)
LHW16-08			1.49	0.109	0.0012	4.37	0.1	0.2892	0.002	1770	18	1705	18	1637	10		(Wang et al., 2020)
LHW16-09			1.11	0.0785	0.0006	1.388	0.0485	0.1268	0.0047	1154	15	873	23	767	27		(Wang et al., 2020)
LHW16-10			2.28	0.1159	0.0026	4.57	0.105	0.2842	0.0024	1883	41	1743	20	1612	12		(Wang et al., 2020)
LHW16-11			1.78	0.0731	0.001	1.246	0.017	0.1229	0.0006	1001	28	820	8	748	3		(Wang et al., 2020)
LHW16-12			1.48	0.1037	0.0009	3.802	0.029	0.2647	0.0011	1686	16	1592	6	1513	6		(Wang et al., 2020)
LHW16-13			1.36	0.1035	0.0007	3.128	0.02	0.2174	0.0011	1690	13	1439	5	1268	6		(Wang et al., 2020)
LHW16-14			1.22	0.0956	0.003	1.86	0.065	0.1381	0.001	1480	55	1053	22	834	6		(Wang et al., 2020)
LHW16-15			1.29	0.169	0.0018	11.2	0.115	0.4784	0.0031	2541	18	2537	10	2519	14		(Wang et al., 2020)
LHW16-16			0.79	0.1204	0.0027	5.02	0.13	0.3011	0.002	1936	36	1811	20	1696	10		(Wang et al., 2020)
LHW16-17			0.9	0.1794	0.0017	11.87	0.18	0.4744	0.0031	2642	15	2589	13	2502	14		(Wang et al., 2020)
LHW16-18			0.55	0.1193	0.0012	4.84	0.055	0.2932	0.0014	1940	18	1790	10	1657	7		(Wang et al., 2020)
LHW16-19			1.47	0.1231	0.0044	4.35	0.175	0.2537	0.0022	1930	55	1675	31	1457	11		(Wang et al., 2020)
LHW16-20			0.67	0.1818	0.0037	7.54	0.185	0.2983	0.002	2645	35	2164	22	1682	10		(Wang et al., 2020)
LHW16-21			0.76	0.1193	0.003	4.57	0.125	0.276	0.0015	1926	43	1730	22	1571	8		(Wang et al., 2020)
LHW16-22			1.94	0.0978	0.0013	3.353	0.047	0.2475	0.0017	1570	25	1490	11	1425	9		(Wang et al., 2020)
LHW16-23			0.98	0.0828	0.002	1.74	0.0475	0.152	0.0015	1225	44	1015	17	912	8		(Wang et al., 2020)
LHW16-24			0.89	0.0848	0.0019	1.584	0.037	0.1345	0.0009	1305	47	967	16	813	5		(Wang et al., 2020)
LHW16-25			0.9	0.166	0.007	7.05	0.41	0.2932	0.005	2500	75	2077	50	1656	25		(Wang et al., 2020)
LHW16-26			0.8	0.172	0.006	2.71	0.1	0.1147	0.0011	2550	55	1323	27	700	6		(Wang et al., 2020)
LHW16-27			1.16	0.1072	0.0028	2.77	0.055	0.1903	0.0015	1729	47	1349	15	1123	8		(Wang et al., 2020)
LHW16-28			0.26	0.1033	0.0017	3.44	0.055	0.2411	0.0011	1667	28	1510	12	1392	6		(Wang et al., 2020)
LHW16-29			1.1	0.0934	0.0011	3.16	0.07	0.2455	0.0031	1458	22	1438	17	1414	16		(Wang et al., 2020)
LHW16-30			1.71	0.222	0.008	8.47	0.39	0.271	0.0031	2960	55	2255	39	1554	18		(Wang et al., 2020)
LHW16-31			1.91	0.1092	0.0014	4.64	0.06	0.3077	0.0022	1774	24	1753	11	1729	11		(Wang et al., 2020)
LHW16-32			1.13	0.0676	0.0009	1.18	0.0155	0.1265	0.0006	865	31	793	8	768	3		(Wang et al., 2020)
LHW16-33			1.14	0.1003	0.001	3.954	0.0415	0.2859	0.0014	1622	19	1626	9	1621	7		(Wang et al., 2020)
LHW16-34			3.66	0.199	0.0065	10.82	0.425	0.3908	0.0038	2775	50	2484	34	2126	18		(Wang et al., 2020)
LHW16-35			0.89	0.0737	0.0006	1.559	0.012	0.1532	0.0009	1027	15	953	5	919	5		(Wang et al., 2020)
LHW16-36			1.92	0.0785	0.0009	1.517	0.017	0.1405	0.0008	1160	21	936	7	848	4		(Wang et al., 2020)
LHW16-37			0.93	0.1758	0.003	8.02	0.175	0.3305	0.0022	2617	27	2236	19	1841	11		(Wang et al., 2020)
LHW16-38			1.15	0.104	0.0009	4.312	0.039	0.2996	0.0019	1691	16	1694	8	1689	10		(Wang et al., 2020)
LHW16-39			1.34	0.102	0.0024	3.47	0.185	0.246	0.0032	1590	35	1500	36	1426	17		(Wang et al., 2020)
LHW16-40			1.2	0.1067	0.0008	4.612	0.04	0.3132	0.002	1746	13	1750	7	1756	10		(Wang et al., 2020)
LHW16-41			2.61	0.1163	0.0021	4.23	0.075	0.2634	0.0023	1879	32	1675	14	1507	12		(Wang et al., 2020)
LHW16-42			0.85	0.112	0.0007	3.44	0.045	0.2225	0.0025	1834	11	1511	10	1295	13		(Wang et al., 2020)
LHW16-43			0.64	0.1663	0.0012	11.03	0.085	0.4792	0.0029	2517	12	2524	7	2523	13		(Wang et al., 2020)
LHW16-44			1.86	0.1668	0.001	10.92	0.065	0.4754	0.0025	2523	10	2515	6	2507	11		(Wang et al., 2020)
LHW16-45			3	0.1047	0.0012	4.315	0.0465	0.2985	0.0017	1710	19	1694	9	1684	9		(Wang et al., 2020)
LHW16-46			0.84	0.0992	0.0007	3.85	0.0255	0.2813	0.0012	1606	13	1602	6	1598	6		(Wang et al., 2020)
LHW16-47			0.61	0.0943	0.0009	3.534	0.0335	0.2718	0.0016	1507	17	1533	8	1550	8		(Wang et al., 2020)
LHW16-48			1.51	0.1228	0.0022	3.17	0.07	0.1861	0.0016	1987	30	1455	19	1100	9		(Wang et al., 2020)
LHW16-49			2.96	0.231	0.006	10.9	0.255	0.3466	0.0034	3027	40	2510	22	1917	17		(Wang et al., 2020)
LHW16-50			0.83	0.0841	0.0007	2.39	0.0335	0.2042	0.0019	1301	19	1238	10	1198	10		(Wang et al., 2020)
LHW16-51			1.13	0.1674	0.0011	10.84	0.08	0.4684	0.0023	2529	11	2508	7	2476	10		(Wang et al., 2020)
LHW16-52			1.08	0.1181	0.0012	4.88	0.049	0.2998	0.0016	1922	18	1797	9	1690	8		(Wang et al., 2020)
LHW16-53			2	0.1094	0.0018	4.2	0.075	0.2764	0.0025	1787	32	1668	14	1573	13		(Wang et al., 2020)
LHW16-54			0.57	0.099	0.0032	2.48	0.085	0.1771	0.001	1570	55	1251	23	1051	5		(Wang et al., 2020)
LHW16-55			0.76	0.1	0.0011	3.758	0.04	0.2726	0.0016	1624	22	1585	9	1553	8		(Wang et al., 2020)
LHW16-56			1.91	0.1256	0.0022	5.26	0.08	0.3072	0.0034	2031	32	1861	13	1726	17		(Wang et al., 2020)
LHW16-57			0.93	0.125	0.0075	3.61	0.235	0.2077	0.0014	1820	95	1486	46	1216	8		(Wang et al., 2020)
LHW16-59			1.52	0.1661	0.0009	7.8	0.18	0.34	0.0075	2517	9	2202	21	1881	36		(Wang et al., 2020)
LHW16-60			1.71	0.1325	0.0049	3.88	0.16	0.2162	0.0042	2110	65	1585	28	1260	22		(Wang et al., 2020)
LHW16-61			1.76	0.148	0.005	5.23	0.22	0.254	0.0026	2290	60	1830	33	1458	14		(Wang et al., 2020)
LHW16-62			1.28	0.1626	0.004	6.72	0.195	0.3005	0.0027	2482	42	2065	24	1693	14		(Wang et al., 2020)
LHW16-63			2.15	0.1098	0.0023	4.15	0.1	0.2759	0.0025	1769	37	1655	19	1570	13		(Wang et al., 2020)
LHW16-64			0.66	0.1106	0.0011	4.66	0.06	0.3053	0.0014	1811	20	1757	11	1717	7		(Wang et al., 2020)
LHW16-65			1.34	0.2435	0.0037	19.98	0.385	0.5947	0.0042	3132	22	3082	17	3007	17		(Wang et al., 2020)
LHW16-66			2.75	0.1389	0.0025	5.86	0.125	0.3065	0.0029	2207	32	1946	18	1723	14		(Wang et al., 2020)
LHW16-67			0.98	0.091	0.0008	2.378	0.0265	0.1895	0.0013	1441	16	1234	8	1119	7		(Wang et al., 2020)
LHW16-68			0.81	0.1067	0.001	4.329	0.0485	0.2935	0.0022	1739	18	1697	9	1659	11		(Wang et al., 2020)
LHW16-69			3.42	0.1053	0.0036	1.93	0.08	0.1299	0.0009	1700	65	1073	25	787	5		(Wang et al., 2020)
LHW16-70			1.19	0.1012	0.0012	3.735	0.043	0.2684	0.0017	1639	22	1577	9	1533	9		(Wang et al., 2020)
LHW16-71			0.78	0.1057	0.0007	4.374	0.031	0.3004	0.0016	1723	12	1706	6	1693	8		(Wang et al., 2020)
LHW16-72			2.73	0.08	0.0013	2.214	0.038	0.2007	0.0015	1179	31	1181	12	1179	8		(Wang et al., 2020)
LHW16-73			0.98	0.075	0.001	1.63	0.026	0.157	0.0011	1060	28	980	10	940	6		(Wang et al., 2020)
LHW16-74			0.9	0.1783	0.0013	12.01	0.105	0.4893	0.0029	2634	12	2604	8	2567	13		(Wang et al., 2020)
LHW16-75			1.46	0.2148	0.0018	17.57	0.175	0.596	0.0055	2937	14	2964	10	3011	22		(Wang et al., 2020)
LHW16-76			1.72	0.179	0.0085	3.03	0.175	0.1206	0.0019	2570	75	1384	42	734	11		(Wang et al., 2020)
LHW16-77			0.66	0.0904	0.0014	2.549	0.0375	0.2051	0.0018	1417	30	1283	11	1202	9		(Wang et al., 2020)
LHW16-78			1.18	0.1051	0.0012	4.151	0.0455	0.287	0.0019	1707	21	1662	9	1626	9		(Wang et al., 2020)
LHW16-79			1.94	0.147	0.006	2.19	0.095	0.1102	0.0024	2260	65	1162	28	674	14		(Wang et al., 2020)
LHW16-80			1.5	0.1521	0.0012	9.3	0.075	0.4444	0.0023	2366	13	2367	8	2370	10		(Wang et al., 2020)
LHW18-01			0.13	0.1168	0.0013	4.97	0.055	0.3122	0.0022	1905	20	1814	10	1752	11		(Wang et al., 2020)
LHW18-02			0.86	0.234	0.0165	11.2	0.95	0.317	0.008	2790	130	2270	##	1770	38		(Wang et al., 2020)
LHW18-03			0.16	0.1179	0.001	5.487	0.0495	0.338	0.0012	1920	15	1897	8	1877	6		(Wang et al., 2020)
LHW18-04			1.01	0.118	0.0009	5.053	0.0405	0.3132	0.0018	1922	13	1827	7	1756	9		(Wang et al., 2020)
LHW18-05			0.3	0.1139	0.0007	5.158	0.044	0.331	0.0027	1859	10	1847	7	1843	13		(Wang et al., 2020)
LHW18-06			1.26	0.367	0.008	16.2	0.55	0.3195	0.005	3753	33	2859	32	1785	24		(Wang et al., 2020)
LHW18-07			0.35	0.1195	0.0012	5.58	0.065	0.3416	0.0018	1942	17	1910	10	1894	9		(Wang et al., 2020)
LHW18-08			1.54	0.1122	0.0005	5.071	0.0315	0.3301	0.0018	1833	8	1830	6	1838	9		(Wang et al., 2020)
LHW18-09			1.28	0.0862	0.003	1.36	0.065	0.1144	0.0016	1320	70	867	27	698	9		(Wang et al., 2020)
LHW18-10			1.04	0.258	0.0145	14.1	1.25	0.367	0.0125	3060	85	2580	85	2000	60		(Wang et al., 2020)
LHW18-11			0.4	0.0695	0.0009	1.332	0.0175	0.1404	0.0012	898	26	858	8	847	7		(Wang et al., 2020)
LHW18-12			0.73	0.0675	0.001	1.312	0.02	0.1419	0.001	833	31	849	9	855	6		(Wang et al., 2020)
LHW18-13			0.84	0.1131	0.0008	5.247	0.0395	0.3395	0.0019	1846	12	1859	7	1884	9		(Wang et al., 2020)
LHW18-14			1.22	0.1123	0.0009	4.956	0.0345	0.3213	0.0015	1831	14	1813	6	1796	7		(Wang et al., 2020)
LHW18-15			1.28	0.132	0.0075	2.82	0.195	0.1521	0.0019	2020	90	1319	45	912	11		(Wang et al., 2020)
LHW18-16			0.52	0.1134	0.001	5.195	0.0415	0.3352	0.0021	1849	16	1850	7	1863	10		(Wang et al., 2020)
LHW18-17			0.21	0.1249	0.0009	6.099	0.041	0.357	0.0022	2023	12	1989	6	1968	10		(Wang et al., 2020)
LHW18-18			0.5	0.118	0.0011	5.336	0.0495	0.3295	0.0015	1919	16	1873	8	1836	8		(Wang et al., 2020)
LHW18-19			0.48	0.1125	0.0009	5.066	0.0405	0.3303	0.0019	1836	14	1829	7	1840	9		(Wang et al., 2020)
LHW18-20			0.82	0.0711	0.0011	1.386	0.0205	0.1422	0.001	950	31	881	9	857	6		(Wang et al., 2020)
LHW18-21			0.34	0.1119	0.0007	4.551	0.0315	0.2956	0.0014	1832	10	1739	6	1669	7		(Wang et al., 2020)
LHW18-22			0.15	0.1033	0.0013	2.89	0.215	0.195	0.0135	1671	25	1250	65	1120	75		(Wang et al., 2020)
LHW18-23			0.33	0.113	0.0008	5.103	0.039	0.3291	0.0016	1843	13	1835	7	1834	8		(Wang et al., 2020)
LHW18-24			0.34	0.1123	0.0004	4.85	0.0245	0.3165	0.0016	1835	6	1793	4	1772	8		(Wang et al., 2020)
LHW18-25			1.01	0.391	0.01	12.9	0.6	0.237	0.0055	3842	38	2636	41	1369	28		(Wang et al., 2020)
LHW18-26			0.99	0.0694	0.0012	1.361	0.0245	0.1425	0.001	896	39	869	11	859	6		(Wang et al., 2020)
LHW18-27			0.58	0.1277	0.0014	6	0.2	0.3376	0.0038	2036	18	1952	27	1874	18		(Wang et al., 2020)
LHW18-28			0.58	0.1335	0.0028	6.22	0.1	0.3402	0.0045	2138	36	2006	15	1887	22		(Wang et al., 2020)
LHW18-29			0.73	0.1136	0.0008	5.317	0.0445	0.3424	0.002	1854	13	1870	7	1898	10		(Wang et al., 2020)
LHW18-30			0.97	0.0992	0.0013	2.79	0.055	0.2055	0.0024	1606	25	1352	16	1204	13		(Wang et al., 2020)
LHW18-30_1			0.81	0.1117	0.0007	5.012	0.0355	0.3268	0.0012	1829	11	1820	6	1823	6		(Wang et al., 2020)
LHW18-31			0.19	0.1131	0.0007	4.976	0.034	0.3213	0.0013	1846	11	1814	6	1796	7		(Wang et al., 2020)
LHW18-32			0.42	0.07	0.001	1.386	0.0185	0.1452	0.0013	909	30	881	8	874	7		(Wang et al., 2020)
LHW18-34			0.39	0.1097	0.0009	3.75	0.075	0.2509	0.0044	1790	14	1574	17	1440	23		(Wang et al., 2020)
LHW18-35			0.95	0.0674	0.0011	1.046	0.018	0.114	0.0008	826	35	725	9	696	5		(Wang et al., 2020)
LHW18-36			0.42	0.1135	0.0008	5.136	0.041	0.3303	0.0015	1852	12	1841	7	1840	7		(Wang et al., 2020)
LHW18-37			0.61	0.1206	0.0023	4.32	0.09	0.2611	0.0017	1957	35	1690	16	1495	9		(Wang et al., 2020)
LHW18-38			0.49	0.0892	0.0006	2.315	0.015	0.1891	0.0009	1405	13	1216	5	1116	5		(Wang et al., 2020)
LHW18-39			0.7	0.0685	0.0011	1.328	0.022	0.1419	0.001	859	35	855	10	855	6		(Wang et al., 2020)
LHW18-40			0.95	0.0707	0.0013	1.551	0.0305	0.1604	0.0013	918	39	946	13	959	7		(Wang et al., 2020)
LHW18-41			0.32	0.129	0.0023	5.85	0.125	0.3297	0.0031	2077	30	1950	18	1836	15		(Wang et al., 2020)
LHW18-42			0.44	0.1126	0.0009	4.414	0.0485	0.2864	0.0031	1840	14	1714	9	1623	16		(Wang et al., 2020)
LHW18-43			0.32	0.1131	0.0006	5.16	0.032	0.3333	0.0014	1847	9	1845	6	1854	7		(Wang et al., 2020)
LHW18-44			0.31	0.1147	0.0009	5.2	0.0435	0.332	0.0022	1876	13	1851	7	1847	11		(Wang et al., 2020)
LHW18-45			0.5	0.1133	0.0007	5.246	0.033	0.3386	0.0018	1849	11	1859	6	1880	9		(Wang et al., 2020)
LHW18-46			1.15	0.0713	0.0011	1.52	0.0205	0.1561	0.0011	958	34	936	8	935	6		(Wang et al., 2020)
LHW18-47			0.58	0.1129	0.0006	4.854	0.04	0.3146	0.0024	1843	10	1796	8	1763	12		(Wang et al., 2020)
LHW18-48			1.37	0.1075	0.001	4.612	0.047	0.3139	0.0019	1750	17	1749	9	1759	9		(Wang et al., 2020)
LHW18-49			1.35	0.0509	0.0013	0.0681	0.0016	0.0098	0.0001	200	55	67	1	63	1		(Wang et al., 2020)
LHW18-50			0.67	0.1134	0.0009	5.174	0.0415	0.3344	0.0032	1849	15	1847	7	1859	15		(Wang et al., 2020)
LHW18-51			0.49	0.1146	0.0008	5.183	0.038	0.3318	0.0018	1870	12	1849	6	1847	9		(Wang et al., 2020)
LHW18-52			0.98	0.2201	0.0021	14.05	0.165	0.466	0.0055	2976	15	2750	11	2463	25		(Wang et al., 2020)
LHW18-53			0.77	0.0965	0.0015	3.3	0.05	0.2494	0.0022	1539	30	1476	12	1435	11		(Wang et al., 2020)
LHW18-54			0.5	0.17	0.002	10.6	0.335	0.4455	0.0029	2566	20	2478	26	2375	13		(Wang et al., 2020)
LHW18-55			0.32	0.1202	0.0019	3.2	0.145	0.193	0.006	1941	29	1430	34	1131	32		(Wang et al., 2020)
LHW18-56			0.3	0.1122	0.0006	4.804	0.0365	0.3134	0.0024	1832	9	1784	7	1757	12		(Wang et al., 2020)
LHW18-57			1.67	0.118	0.0065	3.4	0.22	0.2033	0.002	1710	100	1436	46	1193	11		(Wang et al., 2020)
LHW18-58			0.93	0.102	0.0014	3.875	0.049	0.2773	0.0021	1649	23	1605	10	1577	11		(Wang et al., 2020)
LHW18-59			0.74	0.1134	0.0007	5.176	0.035	0.334	0.002	1851	11	1848	6	1857	10		(Wang et al., 2020)
LHW18-60			0.5	0.1129	0.0007	5.033	0.0455	0.326	0.0025	1843	12	1823	8	1818	12		(Wang et al., 2020)
LHW18-61			0.53	0.1116	0.0006	3.85	0.07	0.2488	0.004	1823	10	1598	14	1440	23		(Wang et al., 2020)
LHW18-62			0.37	0.1155	0.0007	4.37	0.05	0.2742	0.0023	1889	10	1704	10	1562	12		(Wang et al., 2020)
LHW18-63			0.36	0.1142	0.0007	5.015	0.03	0.3223	0.0019	1865	11	1821	5	1801	9		(Wang et al., 2020)
LHW18-64			0.64	0.1159	0.0008	5.181	0.036	0.3269	0.0015	1891	12	1848	6	1823	7		(Wang et al., 2020)
LHW18-65			0.43	0.0721	0.0004	1.554	0.0135	0.1566	0.0011	989	12	951	6	938	6		(Wang et al., 2020)
LHW18-66			0.42	0.245	0.0085	11.5	0.55	0.341	0.005	3100	55	2528	44	1887	25		(Wang et al., 2020)
LHW18-67			0.52	0.136	0.0017	6.63	0.145	0.353	0.005	2175	23	2052	20	1946	24		(Wang et al., 2020)
LHW18-68			0.3	0.1256	0.0013	4.97	0.055	0.2879	0.0014	2037	19	1811	10	1631	7		(Wang et al., 2020)
LHW18-69			0.48	0.33	0.006	19.4	0.65	0.42	0.007	3598	28	3030	31	2268	33		(Wang et al., 2020)
LHW18-70			0.61	0.1124	0.0007	4.387	0.0335	0.2834	0.0016	1835	11	1709	6	1608	8		(Wang et al., 2020)
LHW18-71			0.73	0.1154	0.0007	4.657	0.04	0.2948	0.0025	1882	11	1761	8	1665	13		(Wang et al., 2020)
LHW18-72			0.58	0.1135	0.0008	4.61	0.08	0.2957	0.0044	1852	12	1744	16	1668	23		(Wang et al., 2020)
In51(Ediacaran Infra-Krol Formation)
In51-a2			0.26	0.1143	0.0009	5.73	0.0774	0.3638	0.004	1869	14	1937	12	2000	19		(Hoffman et al., 2011)
In51-a3			1.47	0.1166	0.001	5.89	0.0825	0.3661	0.0038	1905	16	1959	12	2011	19		(Hoffman et al., 2011)
In51-a4			0.48	0.1502	0.0009	8.97	0.1166	0.4334	0.005	2348	11	2335	12	2321	23		(Hoffman et al., 2011)
In51-a5			1.78	0.1666	0.0011	10.13	0.1975	0.4409	0.0082	2524	11	2447	19	2355	37		(Hoffman et al., 2011)
In51-a6			0.58	0.1071	0.001	4.76	0.069	0.3221	0.0037	1751	17	1777	13	1800	18		(Hoffman et al., 2011)
In51-a7			1.28	0.0626	0.0006	0.98	0.0142	0.1136	0.0012	696	20	694	8	694	7		(Hoffman et al., 2011)
In51-a8			0.64	0.1489	0.0009	9.01	0.1126	0.4388	0.0048	2333	11	2339	12	2345	22		(Hoffman et al., 2011)
In51-a9			0.56	0.1389	0.0009	8.47	0.1101	0.4422	0.0051	2213	12	2282	12	2360	23		(Hoffman et al., 2011)
In51-a10			1.1	0.1321	0.0008	7.07	0.0954	0.388	0.0047	2126	11	2120	12	2114	22		(Hoffman et al., 2011)
In51-a11			0.43	0.1612	0.0006	10.91	0.12	0.4908	0.0052	2468	6	2515	10	2574	22		(Hoffman et al., 2011)
In51-a13			1.27	0.1611	0.0014	11.09	0.2052	0.4989	0.0082	2468	15	2530	18	2609	36		(Hoffman et al., 2011)
In51-a14			0.84	0.0692	0.0006	1.48	0.0207	0.1548	0.0019	906	16	921	9	928	10		(Hoffman et al., 2011)
In51-a15			1.72	0.0773	0.001	1.87	0.0318	0.1755	0.0019	1128	26	1071	11	1043	11		(Hoffman et al., 2011)
In51-a16			0.75	0.118	0.0008	5.88	0.0794	0.3616	0.0043	1926	12	1958	12	1990	20		(Hoffman et al., 2011)
In51-a18			0.49	0.14	0.0011	8.84	0.1238	0.4581	0.0055	2228	13	2322	13	2431	24		(Hoffman et al., 2011)
In51-a20			1.09	0.1104	0.0024	4.83	0.1208	0.3175	0.0038	1806	40	1790	22	1777	19		(Hoffman et al., 2011)
In51-a21			1.19	0.0952	0.0009	3.53	0.0547	0.2689	0.0035	1533	17	1534	13	1535	18		(Hoffman et al., 2011)
In51-a22			0.63	0.1131	0.0008	5.25	0.0735	0.3366	0.0039	1850	14	1861	12	1870	19		(Hoffman et al., 2011)
In51-a24			0.94	0.1134	0.0008	4.8	0.0624	0.3071	0.0034	1855	13	1785	12	1726	17		(Hoffman et al., 2011)
In51-a25			0.94	0.0693	0.0009	1.45	0.0261	0.1516	0.0019	906	27	909	11	910	11		(Hoffman et al., 2011)
In51-a26			0.93	0.0792	0.001	2.21	0.0376	0.2021	0.0023	1177	25	1183	12	1186	13		(Hoffman et al., 2011)
In51-a27			0.67	0.0661	0.001	1.3	0.0234	0.1427	0.0014	809	32	846	11	860	8		(Hoffman et al., 2011)
In51-a28			0.42	0.1088	0.0009	4.95	0.0693	0.3297	0.0038	1780	15	1811	12	1837	18		(Hoffman et al., 2011)
In51-a29			0.3	0.1146	0.0008	5.34	0.0721	0.3376	0.0039	1874	13	1875	12	1875	19		(Hoffman et al., 2011)
In51-a30			0.97	0.1139	0.0007	5.3	0.0716	0.3371	0.004	1863	12	1868	12	1873	20		(Hoffman et al., 2011)
In51-a31			1.56	0.1032	0.0012	4.18	0.0732	0.2936	0.0038	1682	22	1670	15	1659	20		(Hoffman et al., 2011)
In51-a32			0.73	0.1738	0.0018	12.39	0.1859	0.517	0.0054	2595	18	2634	14	2687	23		(Hoffman et al., 2011)
In51-a33			0.94	0.0671	0.0007	1.32	0.0211	0.1432	0.0017	841	23	857	10	863	10		(Hoffman et al., 2011)
In51-a35			0.82	0.0682	0.0007	1.4	0.021	0.1492	0.0016	875	21	890	9	896	10		(Hoffman et al., 2011)
In51-a36			1.18	0.0763	0.0006	2.01	0.0281	0.1916	0.002	1102	18	1120	10	1130	11		(Hoffman et al., 2011)
In51-a37			1.03	0.0911	0.0014	3.45	0.0673	0.2748	0.0032	1448	30	1516	16	1565	16		(Hoffman et al., 2011)
In51-a38			0.75	0.0983	0.0009	3.85	0.0539	0.2836	0.003	1593	18	1602	12	1610	15		(Hoffman et al., 2011)
In51-a39			0.17	0.1114	0.0008	4.86	0.0632	0.3163	0.0033	1822	14	1795	11	1772	16		(Hoffman et al., 2011)
In51-a40			0.58	0.1133	0.0007	5.49	0.0659	0.3512	0.0037	1853	12	1899	11	1940	18		(Hoffman et al., 2011)
In51-a42			0.92	0.066	0.001	1.28	0.0237	0.1409	0.0016	807	31	838	11	850	10		(Hoffman et al., 2011)
In51-a43			1.12	0.1034	0.0014	4.12	0.0803	0.2887	0.0039	1687	26	1658	17	1635	20		(Hoffman et al., 2011)
In51-a44			1.63	0.069	0.0013	1.4	0.0336	0.1468	0.0022	898	38	888	15	883	13		(Hoffman et al., 2011)
In51-a46			1.61	0.081	0.0007	2.51	0.0364	0.225	0.0026	1222	17	1276	11	1308	14		(Hoffman et al., 2011)
In51-a47			2.46	0.0678	0.0019	1.35	0.0439	0.1449	0.0023	861	59	869	20	872	13		(Hoffman et al., 2011)
In51-a48			0.76	0.0712	0.0013	1.48	0.0318	0.1508	0.0019	962	37	922	14	905	11		(Hoffman et al., 2011)
In51-a49			0.57	0.1417	0.0009	8.5	0.1148	0.435	0.005	2248	12	2286	13	2328	23		(Hoffman et al., 2011)
In51-a50			0.5	0.1401	0.0013	8.5	0.1275	0.4401	0.0053	2229	16	2286	14	2351	24		(Hoffman et al., 2011)
In51-a51			0.94	0.1127	0.0009	5.53	0.0691	0.3558	0.0034	1843	15	1905	11	1962	16		(Hoffman et al., 2011)
In51-a52			0.58	0.113	0.0008	5.42	0.0732	0.348	0.0038	1848	14	1888	12	1925	19		(Hoffman et al., 2011)
In51-a55			0.53	0.1149	0.0009	5.9	0.0767	0.3726	0.0039	1878	14	1961	12	2042	19		(Hoffman et al., 2011)
In51-a57			0.83	0.0745	0.0019	1.67	0.0451	0.1629	0.0017	1055	51	998	18	973	10		(Hoffman et al., 2011)
In51-a58			0.1	0.1241	0.0005	6.69	0.0736	0.3909	0.0041	2016	8	2071	10	2127	19		(Hoffman et al., 2011)
In51-a60			1.44	0.0656	0.0012	1.21	0.0248	0.1334	0.0013	794	38	804	12	807	8		(Hoffman et al., 2011)
In51-a61			1.05	0.08	0.0007	2.38	0.0309	0.2156	0.0022	1197	18	1236	10	1259	12		(Hoffman et al., 2011)
In51-a62			1.12	0.1256	0.0009	6.23	0.1589	0.3596	0.0086	2037	13	2008	23	1980	42		(Hoffman et al., 2011)
In51-a64			1.68	0.1039	0.0008	4.45	0.0556	0.3106	0.0031	1695	14	1722	11	1744	16		(Hoffman et al., 2011)
In51-a65			0.75	0.0985	0.0006	4.04	0.0525	0.2977	0.0033	1595	12	1643	11	1680	17		(Hoffman et al., 2011)
In51-a66			1.6	0.0673	0.0009	1.34	0.0228	0.1441	0.0017	846	27	862	10	868	10		(Hoffman et al., 2011)
In51-2a2			0.62	0.1674	0.0016	11.17	0.1676	0.4841	0.0056	2532	16	2538	14	2545	25		(Hoffman et al., 2011)
In51-2a4			0.61	0.1138	0.0011	5.55	0.0749	0.3535	0.0034	1861	17	1908	12	1952	17		(Hoffman et al., 2011)
In51-2a5			0.93	0.1609	0.0009	10.63	0.1276	0.479	0.005	2465	9	2491	11	2523	23		(Hoffman et al., 2011)
In51-2a6			1.06	0.0659	0.0018	1.21	0.0357	0.1333	0.0016	804	57	806	17	806	9		(Hoffman et al., 2011)
In51-2a7			0.83	0.0981	0.0007	3.89	0.0467	0.2877	0.0027	1589	14	1612	10	1630	14		(Hoffman et al., 2011)
In51-2a8			0.6	0.0629	0.001	1	0.018	0.115	0.001	704	34	702	9	702	6		(Hoffman et al., 2011)
In51-2a11			0.77	0.0683	0.0012	1.37	0.0288	0.1452	0.0016	878	37	875	13	874	9		(Hoffman et al., 2011)
In51-2a14			0.42	0.0697	0.0009	1.54	0.0239	0.1599	0.0014	919	26	945	10	956	8		(Hoffman et al., 2011)
In51-2a18			0.85	0.1629	0.0007	10.98	0.1098	0.4889	0.0044	2486	7	2522	10	2566	20		(Hoffman et al., 2011)
In51-2a19			1.34	0.0705	0.0007	1.54	0.0216	0.1585	0.0016	942	20	946	9	948	9		(Hoffman et al., 2011)
In51-2a20			0.67	0.1695	0.0014	11.19	0.2014	0.4788	0.0077	2552	15	2539	17	2522	34		(Hoffman et al., 2011)
In51-2a21			0.78	0.1602	0.0022	10.41	0.177	0.4712	0.0047	2458	23	2472	16	2489	21		(Hoffman et al., 2011)
In51-2a22			0.47	0.0698	0.0008	1.49	0.0216	0.1549	0.0014	924	24	927	9	928	8		(Hoffman et al., 2011)
In51-2a25			0.78	0.1725	0.0009	12.96	0.1296	0.5452	0.0046	2582	8	2677	10	2805	20		(Hoffman et al., 2011)
In51-2a26			0.33	0.1074	0.0008	4.61	0.0899	0.3117	0.0056	1755	13	1752	17	1749	28		(Hoffman et al., 2011)
In51-2a27			0.99	0.095	0.0007	3.22	0.0386	0.2461	0.0023	1528	14	1463	10	1418	13		(Hoffman et al., 2011)
In51-2a28			1.04	0.1196	0.0007	5.8	0.0638	0.3521	0.0033	1950	11	1947	10	1945	16		(Hoffman et al., 2011)
In51-2a29			0.83	0.0707	0.0011	1.54	0.03	0.1584	0.0018	949	32	948	12	948	11		(Hoffman et al., 2011)
In51-2a30			0.91	0.067	0.001	1.29	0.0226	0.1393	0.0013	839	31	840	10	841	8		(Hoffman et al., 2011)
In51-2a31			0.19	0.1107	0.0008	4.82	0.0603	0.3154	0.0033	1812	13	1788	11	1767	16		(Hoffman et al., 2011)
In51-2a32			1.31	0.1772	0.0011	12.34	0.1604	0.5051	0.0058	2627	10	2631	12	2636	25		(Hoffman et al., 2011)
In51-2a33			1.68	0.1675	0.0011	11.22	0.1178	0.486	0.0041	2533	11	2542	10	2553	18		(Hoffman et al., 2011)
In51-2a35			1	0.1308	0.0019	6.95	0.1251	0.3856	0.004	2109	25	2106	16	2103	19		(Hoffman et al., 2011)
In51-2a36			0.83	0.0707	0.0007	1.54	0.0208	0.1584	0.0013	949	22	948	9	948	7		(Hoffman et al., 2011)
In51-2a37			1.17	0.1075	0.0015	4.6	0.0805	0.3106	0.0036	1757	25	1750	15	1744	18		(Hoffman et al., 2011)
In51-2a39			0.86	0.0705	0.0008	1.54	0.0277	0.1585	0.0021	943	25	947	11	948	12		(Hoffman et al., 2011)
In51-2a47			0.6	0.067	0.0008	1.28	0.0186	0.1386	0.0012	837	24	837	9	837	7		(Hoffman et al., 2011)
In51-2a48			0.85	0.0904	0.0006	3.11	0.0327	0.2499	0.0021	1433	12	1436	9	1438	11		(Hoffman et al., 2011)
In51-2a50			1.14	0.1073	0.0013	4.68	0.0819	0.3166	0.004	1754	22	1764	15	1773	20		(Hoffman et al., 2011)
In51-2a51			1.06	0.113	0.0006	5.2	0.0598	0.3335	0.0033	1849	10	1852	10	1855	16		(Hoffman et al., 2011)
In51-2a52			0.85	0.1153	0.0014	5.54	0.0831	0.3483	0.0031	1885	21	1907	13	1926	16		(Hoffman et al., 2011)
In51-2a53			1.92	0.0784	0.0009	2.2	0.0319	0.2039	0.0018	1157	22	1183	10	1196	10		(Hoffman et al., 2011)
In51-2a55			0.77	0.0676	0.0007	1.19	0.0167	0.1273	0.0011	856	23	795	8	773	6		(Hoffman et al., 2011)
In51-2a57			0.79	0.0774	0.0009	2.04	0.0316	0.1912	0.0018	1132	24	1129	11	1128	10		(Hoffman et al., 2011)
In51-2a58			2.29	0.1138	0.0011	5.34	0.0721	0.3401	0.0032	1861	17	1875	12	1887	16		(Hoffman et al., 2011)
In51-2a59			0.75	0.1842	0.0008	12.83	0.1283	0.5051	0.0045	2691	8	2667	10	2636	19		(Hoffman et al., 2011)
In51-2a60			1	0.1645	0.0012	11.44	0.1316	0.5045	0.0045	2503	12	2560	11	2633	20		(Hoffman et al., 2011)
In51-2a61			1.06	0.1146	0.0007	5.43	0.057	0.344	0.0029	1873	12	1890	10	1906	15		(Hoffman et al., 2011)
In51-2a63			0.76	0.0821	0.0008	2.43	0.0316	0.2149	0.0019	1248	19	1253	10	1255	10		(Hoffman et al., 2011)
In51-2a64			1.05	0.0701	0.0009	1.54	0.0239	0.1589	0.0014	931	26	945	10	951	8		(Hoffman et al., 2011)
In51-2a65			0.45	0.0686	0.0006	1.49	0.0209	0.1574	0.0017	885	18	926	9	943	10		(Hoffman et al., 2011)
In51-2a66			0.95	0.1341	0.0008	7.3	0.0876	0.3944	0.0041	2153	11	2148	11	2143	19		(Hoffman et al., 2011)
In51-2a4			1.42	0.0776	0.0007	2.07	0.0342	0.1935	0.0025	1137	19	1139	12	1140	14		(Hoffman et al., 2011)
In51-2a5			1.67	0.0647	0.0008	1.12	0.0202	0.1254	0.0016	766	26	762	10	761	9		(Hoffman et al., 2011)
In51-2a7			0.99	0.1321	0.0006	7.18	0.0754	0.3942	0.0037	2126	8	2134	9	2142	17		(Hoffman et al., 2011)
In51-2a8			0.83	0.0686	0.0009	1.44	0.0238	0.1528	0.0015	887	27	908	10	916	9		(Hoffman et al., 2011)
In51-2a9			1.76	0.1142	0.0016	5.36	0.1206	0.3403	0.006	1867	26	1878	20	1888	29		(Hoffman et al., 2011)
In51-2a10			0.26	0.1125	0.0005	5.07	0.0786	0.327	0.0047	1841	8	1832	13	1824	24		(Hoffman et al., 2011)
In51-2a11			0.91	0.0991	0.0011	3.97	0.0576	0.2909	0.0025	1607	22	1629	12	1646	13		(Hoffman et al., 2011)
In51-2a13			1.58	0.065	0.0012	1.13	0.0249	0.1259	0.0015	774	39	767	12	765	9		(Hoffman et al., 2011)
In51-2a14			1.17	0.065	0.0011	1.13	0.0226	0.1264	0.0013	774	35	769	11	767	8		(Hoffman et al., 2011)
In51-2a15			0.96	0.0996	0.0009	3.9	0.0507	0.2843	0.0026	1616	17	1614	11	1613	13		(Hoffman et al., 2011)
In51-2a17			0.67	0.1309	0.001	7.19	0.0791	0.3982	0.0034	2111	13	2135	10	2161	15		(Hoffman et al., 2011)
In51-2a18			0.81	0.0953	0.0007	3.8	0.0418	0.2894	0.0025	1535	14	1594	9	1639	12		(Hoffman et al., 2011)
In51-2a21			0.4	0.1598	0.0013	10.28	0.1336	0.4666	0.0047	2453	14	2460	12	2469	21		(Hoffman et al., 2011)
In51-2a22			0.93	0.0979	0.0008	3.79	0.0455	0.2811	0.0025	1585	15	1592	10	1597	13		(Hoffman et al., 2011)
In51-2a24			0.9	0.1324	0.0008	7.27	0.08	0.3983	0.0036	2130	11	2145	10	2161	16		(Hoffman et al., 2011)
In51-2a25			0.6	0.065	0.0005	1.12	0.0146	0.125	0.0013	776	16	764	7	759	8		(Hoffman et al., 2011)
LHW1620 (Ediacaran Infra-Krol Formation)
LHW1620-01			0.43	0.1136	0.0006	4.749	0.0345	0.3022	0.002	1855	10	1775	6	1702	10		(Wang et al., 2020)
LHW1620-02			1.89	0.0833	0.0032	1.51	0.06	0.1294	0.0017	1200	75	918	23	784	10		(Wang et al., 2020)
LHW1620-03			0.91	0.1092	0.0009	4.562	0.04	0.3008	0.0016	1787	16	1741	8	1695	8		(Wang et al., 2020)
LHW1620-04			1.11	0.0908	0.0039	1.47	0.075	0.1144	0.0015	1400	70	896	26	698	9		(Wang et al., 2020)
LHW1620-05			0.05	0.0632	0.0012	0.638	0.0355	0.0757	0.0036	686	41	486	23	468	21		(Wang et al., 2020)
LHW1620-06			0.1	0.1794	0.002	9.31	0.2	0.38	0.0105	2645	18	2365	20	2070	50		(Wang et al., 2020)
LHW1620-06			0.13	0.1737	0.0009	10.79	0.235	0.448	0.01	2592	8	2493	20	2378	44		(Wang et al., 2020)
LHW1620-07			0.5	0.116	0.001	5.395	0.042	0.3355	0.002	1890	15	1883	7	1868	10		(Wang et al., 2020)
LHW1620-08			1.22	0.1386	0.0013	3.52	0.0345	0.1831	0.0009	2206	17	1531	8	1084	5		(Wang et al., 2020)
LHW1620-09			0.02	0.1302	0.003	2.633	0.0355	0.1465	0.0032	2095	40	1308	10	880	18		(Wang et al., 2020)
LHW1620-10			-0.09	0.1078	0.0008	3.449	0.0315	0.2301	0.0016	1759	14	1515	7	1335	8		(Wang et al., 2020)
LHW1620-11			-0.44	0.0959	0.0013	2.772	0.0395	0.2082	0.0025	1539	26	1346	11	1219	14		(Wang et al., 2020)
LHW1620-12			-0.29	0.231	0.006	12.55	0.105	0.4	0.0125	3041	41	2646	8	2160	60		(Wang et al., 2020)
LHW1620-13			-0.08	0.0495	0.0012	0.169	0.0043	0.0246	0.0002	150	50	160	3	157	1		(Wang et al., 2020)
LHW1620-14			0.03	0.0828	0.001	2.216	0.0295	0.1928	0.0023	1258	24	1185	10	1136	13		(Wang et al., 2020)
LHW1620-15			0.02	0.1788	0.0007	8.684	0.0365	0.3507	0.0014	2640	7	2305	4	1938	7		(Wang et al., 2020)
LHW1620-16			0.11	0.1895	0.0016	10.48	0.125	0.4271	0.0025	2736	14	2477	11	2293	12		(Wang et al., 2020)
LHW1620-17			0.12	0.2228	0.0024	12.16	0.075	0.396	0.0044	2994	18	2616	6	2149	20		(Wang et al., 2020)
LHW1620-18			0.74	0.2086	0.0041	8.92	0.165	0.311	0.005	2875	30	2322	17	1743	26		(Wang et al., 2020)
LHW1620-19			0.09	0.192	0.0023	11.25	0.1	0.4282	0.004	2751	20	2542	8	2296	18		(Wang et al., 2020)
LHW1620-20			0.3	0.1867	0.0019	10.39	0.085	0.403	0.0065	2709	17	2469	8	2178	30		(Wang et al., 2020)
LHW1620-20			0.28	0.18	0.0015	10.54	0.055	0.4242	0.0046	2649	13	2483	5	2278	21		(Wang et al., 2020)
LHW1620-21			0.36	0.114	0.0012	5.26	0.05	0.3321	0.0022	1859	19	1861	9	1848	11		(Wang et al., 2020)
LHW1620-22			0.42	0.1569	0.0011	5.91	0.055	0.2709	0.0018	2421	12	1962	8	1545	9		(Wang et al., 2020)
LHW1620-23			0.69	0.0798	0.0012	0.969	0.017	0.0882	0.0007	1185	30	687	9	545	4		(Wang et al., 2020)
LHW1620-24			0.82	0.1156	0.0007	3.699	0.0295	0.2316	0.0016	1886	10	1573	7	1342	9		(Wang et al., 2020)
LHW1620-25			0.25	0.0508	0.0012	0.251	0.005	0.036	0.0002	205	49	227	4	228	1		(Wang et al., 2020)
LHW1620-26			0.39	0.1911	0.0014	8.22	0.08	0.3119	0.0048	2749	12	2254	9	1747	24		(Wang et al., 2020)
LHW1620-27			0.46	0.133	0.0075	0.129	0.0075	0.0069	0.0001	1960	110	124	7	44	1		(Wang et al., 2020)
LHW1620-28			0.73	0.127	0.0085	2.16	0.165	0.1224	0.0014	1950	110	1141	49	744	8		(Wang et al., 2020)
LHW1620-29			0.07	0.179	0.0014	10.05	0.085	0.4065	0.0025	2642	13	2439	8	2199	12		(Wang et al., 2020)
LHW1620-30			0.24	0.1115	0.0007	4.15	0.055	0.2688	0.0036	1821	11	1662	11	1534	19		(Wang et al., 2020)
LHW1620-31			1.06	0.1018	0.0008	0.441	0.0235	0.0345	0.0021	1653	14	370	16	218	13		(Wang et al., 2020)
LHW1620-32			0.7	0.0653	0.0021	0.0731	0.0024	0.0087	0.0001	730	65	72	2	56	0		(Wang et al., 2020)
LHW1620-33			0.65	0.551	0.015	48.5	2.6	0.623	0.022	4366	41	3920	55	3110	85		(Wang et al., 2020)
LHW1620-33			0.61	0.558	0.0097	101	5	1.09	0.04	4260	33	4170	50	4250	##		(Wang et al., 2020)
LHW1620-34			0.75	0.1686	0.0008	4.35	0.195	0.187	0.009	2542	8	1662	38	1093	47		(Wang et al., 2020)
LHW1620-35			0.26	0.1789	0.0013	7.4	0.13	0.2995	0.0048	2640	12	2153	16	1686	24		(Wang et al., 2020)
LHW1620-36			0.07	0.1941	0.0018	10.28	0.185	0.381	0.005	2772	15	2453	17	2081	24		(Wang et al., 2020)
LHW1620-37			0.53	0.1133	0.0007	2.67	0.055	0.1704	0.0037	1850	11	1314	15	1012	21		(Wang et al., 2020)
LHW1620-38			0.48	0.1021	0.0047	2.79	0.15	0.1956	0.0025	1650	90	1337	40	1151	13		(Wang et al., 2020)
LHW1620-39			2.4	0.1098	0.0007	3.406	0.041	0.2225	0.0028	1793	11	1508	9	1300	14		(Wang et al., 2020)
LHW1620-40			0.24	0.0896	0.0007	2.3	0.035	0.1844	0.0025	1414	15	1210	11	1090	14		(Wang et al., 2020)
LHW1620-41			1.73	0.1102	0.0009	4.668	0.035	0.3056	0.0014	1804	16	1763	7	1719	7		(Wang et al., 2020)
LHW1620-42			0.69	0.1832	0.0012	13.12	0.11	0.5151	0.0047	2680	10	2687	8	2677	20		(Wang et al., 2020)
LHW1620-43			0.78	0.062	0.0017	0.276	0.007	0.0321	0.0005	640	55	247	6	204	3		(Wang et al., 2020)
LHW1620-44			1.37	0.1036	0.0014	4.01	0.05	0.2798	0.0026	1677	25	1633	11	1589	13		(Wang et al., 2020)
LHW1620-45			0.57	0.1911	0.0023	9.74	0.115	0.371	0.0065	2743	20	2407	11	2028	30		(Wang et al., 2020)
LHW1620-46			1.39	0.1136	0.0009	1.69	0.06	0.1069	0.0035	1855	14	998	22	654	20		(Wang et al., 2020)
LHW1620-47			1.59	0.1669	0.001	9.1	0.085	0.3921	0.003	2525	10	2347	9	2132	14		(Wang et al., 2020)
LHW1620-47			1.38	0.1679	0.0009	9.41	0.095	0.4043	0.0036	2534	9	2376	9	2188	16		(Wang et al., 2020)
LHW1620-48			2.83	0.1119	0.0042	2.32	0.105	0.1476	0.0015	1790	60	1194	27	887	9		(Wang et al., 2020)
LHW1620-49			0.54	0.0689	0.0032	0.179	0.0085	0.0212	0.0014	750	90	166	7	135	9		(Wang et al., 2020)
LHW1620-50			1.07	0.0516	0.0022	0.139	0.0065	0.019	0.0002	220	90	131	6	121	1		(Wang et al., 2020)
LHW1620-51			0.33	0.116	0.0006	4.42	0.05	0.2751	0.0022	1895	10	1714	9	1566	11		(Wang et al., 2020)
LHW1620-52			0.93	0.1081	0.0005	3.715	0.0455	0.2484	0.0034	1765	8	1572	10	1429	18		(Wang et al., 2020)
LHW1620-52			0.78	0.1062	0.0005	3.943	0.049	0.2674	0.0028	1733	9	1621	10	1527	14		(Wang et al., 2020)
I9GS5 (Ediacaran Sonia Sandstone Jodphur Group)
I9GS5-3c				0.10254	0.715	4.04	6.5	0.2857	6.5	1671	13.2	1642	52	1622	92		(Turner et al., 2014)
I9GS5-5c				0.07068	1.375	1.406	5.6	0.1443	5.5	948	28.1	891	33	870	44		(Turner et al., 2014)
I9GS5-13c				0.10559	0.5	4.246	5.7	0.2917	5.7	1725	9.2	1683	46	1651	83		(Turner et al., 2014)
I9GS5-14c				0.08143	2.813	2.407	7.2	0.2144	6.6	1232	55.1	1244	51	1253	75		(Turner et al., 2014)
I9GS5-15c				0.10641	0.507	4.432	5.7	0.3021	5.6	1739	9.3	1718	46	1703	84		(Turner et al., 2014)
I9GS5-19c				0.08982	3.838	2.913	6.9	0.2353	5.8	1422	73.2	1385	52	1363	71		(Turner et al., 2014)
I9GS5-20c				0.11182	0.841	4.885	6.5	0.3168	6.4	1829	15.2	1799	54	1776	99		(Turner et al., 2014)
I9GS5-21c				0.06551	0.714	1.198	7.2	0.1327	7.1	791	15	800	39	804	54		(Turner et al., 2014)
I9GS5-28c				0.06832	1.113	1.302	6.7	0.1382	6.6	878	23	847	38	835	52		(Turner et al., 2014)
I9GS5-29c				0.06998	1.044	1.391	6.8	0.1441	6.7	928	21.4	885	40	869	55		(Turner et al., 2014)
I9GS5-30c				0.11847	0.704	5.213	6.8	0.3191	6.7	1933	12.6	1854	57	1787	104		(Turner et al., 2014)
I9GS5-31c				0.11385	0.666	5.305	7	0.338	7	1862	12	1869	59	1878	113		(Turner et al., 2014)
I9GS5-32c				0.11119	1.049	4.81	6.8	0.3137	6.7	1819	19	1786	56	1761	103		(Turner et al., 2014)
I9GS5-33c				0.06509	0.78	1.189	6.9	0.1325	6.9	777	16.4	795	38	803	52		(Turner et al., 2014)
I9GS5-34c				0.06891	0.979	1.364	6.7	0.1435	6.7	896	20.2	873	39	865	54		(Turner et al., 2014)
I9GS5-38c				0.06705	1.02	1.214	7	0.1313	6.9	839	21.2	807	38	796	52		(Turner et al., 2014)
I9GS5-40c				0.11298	0.853	5.293	6.7	0.3398	6.6	1848	15.4	1867	56	1887	108		(Turner et al., 2014)
I9GS5-41c				0.11093	1.132	4.889	7.1	0.3197	7	1815	20.5	1800	59	1789	109		(Turner et al., 2014)
I9GS5-42c				0.11509	0.687	5.4	7	0.3403	7	1881	12.4	1885	59	1889	114		(Turner et al., 2014)
I9GS5-43c				0.10549	0.691	4.533	6.7	0.3117	6.7	1723	12.7	1737	55	1750	102		(Turner et al., 2014)
I9GS5-44c				0.11185	1.142	4.466	9.2	0.2896	9.1	1830	20.7	1724	75	1641	131		(Turner et al., 2014)
I9GS5-45c				0.1096	0.676	4.726	6.9	0.3127	6.8	1793	12.3	1772	57	1756	105		(Turner et al., 2014)
I9GS5-46c				0.10877	0.815	4.72	7.2	0.3147	7.1	1779	14.8	1770	59	1765	110		(Turner et al., 2014)
I9GS5-48c				0.11041	0.703	4.694	6.9	0.3083	6.9	1806	12.8	1766	57	1734	104		(Turner et al., 2014)
I9GS5-50c				0.11223	1.091	4.922	7.2	0.3181	7.1	1836	19.7	1806	60	1782	110		(Turner et al., 2014)
I9GS5-51c				0.08108	0.739	2.185	6.6	0.1954	6.6	1223	14.5	1176	45	1152	69		(Turner et al., 2014)
I9GS5-52c				0.06882	0.804	1.39	6.9	0.1465	6.8	893	16.6	885	40	882	56		(Turner et al., 2014)

## Sheet: W Yangtze Cry to Edi
U-Pb ages of detrital zircons from Cryogenian to Ediacaran siliciclastic rocks from the western margin of the Yangtze Block
				Ratio						Age
Sample	Th (ppm)	U (ppm)	Th/U	207Pb/206Pb	1σ	207Pb/235U	1σ	206Pb/238U	1σ	207Pb/206Pb	1σ	207Pb/235U	1σ	206Pb/238U	1σ		References
Z1 (Cryogenian Bikou Group) (N32.555.52, E105.18.02)
Z1-1	57	55	1.05	0.078	0.0023	1.3862	0.0376	0.1289	0.0036	1147	57	883	16	781	20		(Sun et al., 2009)
Z1-2	75	68	1.09	0.0649	0.0019	1.1405	0.0318	0.1274	0.0035	772	61	773	15	773	20		(Sun et al., 2009)
Z1-3	48	55	0.87	0.0666	0.0019	1.2563	0.0345	0.1368	0.0037	826	60	826	16	826	21		(Sun et al., 2009)
Z1-4	45	58	0.78	0.0664	0.0022	1.2451	0.0392	0.136	0.0038	819	68	821	18	822	22		(Sun et al., 2009)
Z1-5	40	63	0.64	0.0648	0.0019	1.1387	0.0318	0.1275	0.0035	766	61	772	15	774	20		(Sun et al., 2009)
Z1-6	138	129	1.07	0.0662	0.0019	1.2153	0.0328	0.1332	0.0036	812	59	808	15	806	21		(Sun et al., 2009)
Z1-7	85	99	0.86	0.0655	0.0015	1.1662	0.0252	0.1292	0.0034	790	48	785	12	783	20		(Sun et al., 2009)
Z1-8	84	67	1.25	0.0654	0.0016	1.1643	0.0269	0.1292	0.0035	786	51	784	13	783	20		(Sun et al., 2009)
Z1-9	292	982	0.3	0.1566	0.0024	9.8843	0.138	0.4578	0.0118	2419	26	2424	13	2430	52		(Sun et al., 2009)
Z1-10	105	132	0.79	0.067	0.0014	1.2917	0.0259	0.1399	0.0037	837	44	842	11	844	21		(Sun et al., 2009)
Z1-11	134	141	0.95	0.0655	0.0012	1.1823	0.0209	0.131	0.0034	789	39	792	10	793	20		(Sun et al., 2009)
Z1-12	58	65	0.89	0.0684	0.0017	1.3771	0.0315	0.1459	0.0039	882	50	879	13	878	22		(Sun et al., 2009)
Z1-13	90	117	0.77	0.0659	0.0014	1.2004	0.0234	0.1322	0.0035	802	43	801	11	800	20		(Sun et al., 2009)
Z1-14	82	63	1.31	0.0663	0.0015	1.2314	0.0268	0.1348	0.0036	815	48	815	12	815	20		(Sun et al., 2009)
Z1-15	145	238	0.61	0.0672	0.0013	1.2895	0.023	0.1391	0.0036	845	39	841	10	839	21		(Sun et al., 2009)
Z1-16	54	80	0.67	0.0676	0.0015	1.315	0.0279	0.1412	0.0038	855	46	852	12	851	21		(Sun et al., 2009)
Z1-17	127	211	0.6	0.0659	0.0015	1.2146	0.0255	0.1337	0.0036	804	46	807	12	809	20		(Sun et al., 2009)
Z1-18	64	62	1.03	0.1643	0.0032	3.6809	0.0652	0.1625	0.0043	2501	32	1567	14	970	24		(Sun et al., 2009)
Z1-19	45	71	0.64	0.0753	0.0024	1.3727	0.0404	0.1322	0.0037	1076	62	877	17	801	21		(Sun et al., 2009)
Z1-20	56	55	1.01	0.0674	0.0026	1.2948	0.0476	0.1393	0.0041	850	79	843	21	841	23		(Sun et al., 2009)
21i (Cryogenian Bikou Group) (N33.022.47, E105.14.53)
21i-1	175	271	0.65	0.1619	0.0031	2.9604	0.0516	0.1326	0.0035	2475	32	1398	13	803	20		(Sun et al., 2009)
21i-2	167	273	0.61	0.1665	0.0029	9.5904	0.1541	0.4178	0.0111	2522	29	2396	15	2251	50		(Sun et al., 2009)
21i-3	366	330	1.11	0.0647	0.0015	1.1191	0.0245	0.1254	0.0034	765	48	763	12	762	19		(Sun et al., 2009)
21i-4	53	78	0.68	0.0733	0.0022	1.182	0.0331	0.1169	0.0033	1023	59	792	15	713	19		(Sun et al., 2009)
21i-7	84	112	0.75	0.1634	0.003	3.3386	0.0558	0.1481	0.0039	2492	30	1490	13	891	22		(Sun et al., 2009)
21i-8	27	72	0.37	0.0678	0.0016	1.3258	0.0297	0.1419	0.0038	861	49	857	13	856	22		(Sun et al., 2009)
21i-9	196	471	0.42	0.1635	0.0026	10.6021	0.1545	0.4704	0.0123	2492	26	2489	14	2485	54		(Sun et al., 2009)
21i-10	79	134	0.59	0.0656	0.0018	1.1809	0.0297	0.1305	0.0036	795	55	792	14	791	20		(Sun et al., 2009)
21i-11	23	68	0.33	0.0643	0.0017	1.1125	0.0282	0.1254	0.0034	752	56	759	14	762	20		(Sun et al., 2009)
21i-12	233	191	1.22	0.163	0.0029	8.0343	0.1331	0.3575	0.0095	2487	30	2235	15	1970	45		(Sun et al., 2009)
21i-14	339	697	0.49	0.0659	0.0017	1.2053	0.029	0.1327	0.0036	803	52	803	13	803	21		(Sun et al., 2009)
21i-15	382	548	0.7	0.0936	0.0016	1.6114	0.026	0.1249	0.0033	1500	32	975	10	759	19		(Sun et al., 2009)
21i-16	367	511	0.72	0.0677	0.0012	1.3333	0.0215	0.1429	0.0038	858	35	860	9	861	21		(Sun et al., 2009)
21i-17	295	523	0.56	0.1603	0.0026	10.1123	0.1539	0.4575	0.012	2459	27	2445	14	2429	53		(Sun et al., 2009)
21i-18	98	125	0.78	0.0892	0.0022	1.6435	0.038	0.1336	0.0037	1409	46	987	15	808	21		(Sun et al., 2009)
21i-19	251	697	0.36	0.1529	0.0025	9.3941	0.1453	0.4457	0.0118	2378	28	2377	14	2376	52		(Sun et al., 2009)
21i-20	99	128	0.77	0.1596	0.0033	3.1801	0.06	0.1445	0.0039	2452	34	1452	15	870	22		(Sun et al., 2009)
Z4 (Cryogenian Bikou Group) (N33.00.55, E105.14.51)
Z4-1	175	271	0.65	0.1619	0.0031	2.9604	0.0516	0.1326	0.0035	2475	32	1398	13	803	20		(Sun et al., 2009)
Z4-2	167	273	0.61	0.1665	0.0029	9.5904	0.1541	0.4178	0.0111	2522	29	2396	15	2251	50		(Sun et al., 2009)
Z4-3	366	330	1.11	0.0647	0.0015	1.1191	0.0245	0.1254	0.0034	765	48	763	12	762	19		(Sun et al., 2009)
Z4-4	53	78	0.68	0.0733	0.0022	1.182	0.0331	0.1169	0.0033	1023	59	792	15	713	19		(Sun et al., 2009)
Z4-7	84	112	0.75	0.1634	0.003	3.3386	0.0558	0.1481	0.0039	2492	30	1490	13	891	22		(Sun et al., 2009)
Z4-8	27	72	0.37	0.0678	0.0016	1.3258	0.0297	0.1419	0.0038	861	49	857	13	856	22		(Sun et al., 2009)
Z4-9	196	471	0.42	0.1635	0.0026	10.6021	0.1545	0.4704	0.0123	2492	26	2489	14	2485	54		(Sun et al., 2009)
Z4-10	79	134	0.59	0.0656	0.0018	1.1809	0.0297	0.1305	0.0036	795	55	792	14	791	20		(Sun et al., 2009)
Z4-11	23	68	0.33	0.0643	0.0017	1.1125	0.0282	0.1254	0.0034	752	56	759	14	762	20		(Sun et al., 2009)
Z4-12	233	191	1.22	0.163	0.0029	8.0343	0.1331	0.3575	0.0095	2487	30	2235	15	1970	45		(Sun et al., 2009)
Z4-14	339	697	0.49	0.0659	0.0017	1.2053	0.029	0.1327	0.0036	803	52	803	13	803	21		(Sun et al., 2009)
Z4-15	382	548	0.7	0.0936	0.0016	1.6114	0.026	0.1249	0.0033	1500	32	975	10	759	19		(Sun et al., 2009)
Z4-16	367	511	0.72	0.0677	0.0012	1.3333	0.0215	0.1429	0.0038	858	35	860	9	861	21		(Sun et al., 2009)
Z4-17	295	523	0.56	0.1603	0.0026	10.1123	0.1539	0.4575	0.012	2459	27	2445	14	2429	53		(Sun et al., 2009)
Z4-18	98	125	0.78	0.0892	0.0022	1.6435	0.038	0.1336	0.0037	1409	46	987	15	808	21		(Sun et al., 2009)
Z4-19	251	697	0.36	0.1529	0.0025	9.3941	0.1453	0.4457	0.0118	2378	28	2377	14	2376	52		(Sun et al., 2009)
Z4-20	99	128	0.77	0.1596	0.0033	3.1801	0.06	0.1445	0.0039	2452	34	1452	15	870	22		(Sun et al., 2009)
Z5 (Cryogenian Bikou Group) (N32.59.15, E105.14.21)
Z5-1	57	58	0.99	0.0658	0.0016	1.2142	0.0273	0.1338	0.0037	800	49	807	13	810	21		(Sun et al., 2009)
Z5-3	20	24	0.81	0.0651	0.0018	1.1587	0.0298	0.1291	0.0036	777	56	781	14	783	20		(Sun et al., 2009)
Z5-4	63	64	0.99	0.0637	0.0017	1.0763	0.0279	0.1225	0.0034	733	57	742	14	745	20		(Sun et al., 2009)
Z5-5	36	38	0.93	0.0646	0.002	1.1303	0.033	0.1268	0.0036	762	63	768	16	770	21		(Sun et al., 2009)
Z5-6	92	94	0.98	0.0664	0.0013	1.2312	0.0235	0.1344	0.0036	820	41	815	11	813	21		(Sun et al., 2009)
Z5-7	121	143	0.85	0.0674	0.0015	1.3297	0.0288	0.143	0.0039	851	47	859	13	862	22		(Sun et al., 2009)
Z5-8	58	63	0.92	0.066	0.0017	1.2067	0.0294	0.1327	0.0037	805	53	804	14	803	21		(Sun et al., 2009)
Z5-9	54	64	0.84	0.0655	0.0014	1.1871	0.0246	0.1315	0.0036	790	45	795	11	796	20		(Sun et al., 2009)
Z5-10	43	52	0.82	0.0664	0.0015	1.2383	0.0274	0.1353	0.0037	818	48	818	12	818	21		(Sun et al., 2009)
Z5-11	48	58	0.83	0.0665	0.0016	1.2421	0.0277	0.1354	0.0037	823	48	820	13	819	21		(Sun et al., 2009)
Z5-12	56	63	0.88	0.069	0.0018	1.0068	0.0245	0.1058	0.0029	900	52	707	12	648	17		(Sun et al., 2009)
Z5-13	46	51	0.89	0.0666	0.002	1.2488	0.0364	0.1361	0.0039	824	63	823	16	823	22		(Sun et al., 2009)
Z5-14	75	104	0.73	0.0665	0.0019	1.2527	0.0345	0.1366	0.0039	823	59	825	16	825	22		(Sun et al., 2009)
Z5-15	44	56	0.78	0.067	0.0016	1.2737	0.0282	0.138	0.0038	836	48	834	13	833	21		(Sun et al., 2009)
Z5-16	51	55	0.93	0.0643	0.0021	1.1064	0.0344	0.1248	0.0036	751	67	756	17	758	21		(Sun et al., 2009)
Z5-17	70	68	1.04	0.0646	0.0016	1.1137	0.027	0.125	0.0035	762	53	760	13	759	20		(Sun et al., 2009)
Z5-18	71	115	0.62	0.1566	0.0029	9.9241	0.1748	0.4595	0.0125	2420	31	2428	16	2437	55		(Sun et al., 2009)
Z5-19	58	69	0.83	0.0665	0.0017	1.2546	0.0302	0.1369	0.0038	822	52	826	14	827	22		(Sun et al., 2009)
Z5-20	62	67	0.92	0.0661	0.0023	1.2339	0.0414	0.1353	0.004	811	72	816	19	818	23		(Sun et al., 2009)
Z6 (Cryogenian Bikou Group) (N32.55.22, E105.18.32)
Z6-1	53	66	0.8	0.068	0.002	1.3486	0.0375	0.1439	0.0041	868	59	867	16	867	23		(Sun et al., 2009)
Z6-2	39	45	0.86	0.0777	0.0024	1.3842	0.041	0.1293	0.0037	1139	61	882	17	784	21		(Sun et al., 2009)
Z6-3	69	140	0.49	0.1563	0.0028	9.8364	0.1689	0.4565	0.0124	2416	30	2420	16	2424	55		(Sun et al., 2009)
Z6-5	95	119	0.8	0.0672	0.0023	1.3053	0.0426	0.1408	0.0041	845	70	848	19	849	23		(Sun et al., 2009)
Z6-7	51	59	0.86	0.0671	0.0026	1.2913	0.0468	0.1396	0.0042	840	77	842	21	842	24		(Sun et al., 2009)
Z6-8	32	34	0.94	0.0819	0.0031	1.4297	0.0513	0.1267	0.0039	1243	73	901	21	769	22		(Sun et al., 2009)
Z6-10	99	182	0.55	0.1538	0.0035	9.2348	0.2021	0.4354	0.0125	2389	38	2362	20	2330	56		(Sun et al., 2009)
Z6-11	173	108	1.6	0.1735	0.0034	11.6349	0.2166	0.4864	0.0134	2592	32	2576	17	2555	58		(Sun et al., 2009)
Z6-12	28	49	0.56	0.1594	0.0033	5.7083	0.1114	0.2597	0.0072	2450	34	1933	17	1488	37		(Sun et al., 2009)
Z6-13	147	593	0.25	0.1616	0.003	10.4796	0.1843	0.4702	0.0128	2473	30	2478	16	2485	56		(Sun et al., 2009)
Z6-14	26	46	0.57	0.0685	0.0022	1.3948	0.0422	0.1476	0.0043	885	64	887	18	888	24		(Sun et al., 2009)
Z6-15	92	96	0.96	0.068	0.0015	1.3497	0.0281	0.1439	0.004	869	44	867	12	867	22		(Sun et al., 2009)
Z6-16	119	141	0.85	0.0693	0.0015	1.4468	0.0306	0.1514	0.0042	908	45	909	13	909	23		(Sun et al., 2009)
Z6-17	29	40	0.73	0.0742	0.0023	1.4658	0.0437	0.1433	0.0042	1047	62	916	18	863	24		(Sun et al., 2009)
Z6-18	44	141	0.31	0.0656	0.0024	1.1593	0.0404	0.1282	0.0038	793	75	782	19	778	22		(Sun et al., 2009)
Z6-19	30	48	0.63	0.066	0.0026	1.2219	0.0453	0.1343	0.0041	806	79	811	21	812	23		(Sun et al., 2009)
Z6-20	44	59	0.74	0.0675	0.002	1.3027	0.0376	0.14	0.004	853	61	847	17	845	23		(Sun et al., 2009)
LGL (Ediacaran strata) (N27.01 01, E101.31.49)
LGL-1	50	125	0.4	0.0652	0.0015	1.1625	0.0248	0.1293	0.0035	782	47	783	12	784	20		(Sun et al., 2009)
LGL-2	80	134	0.6	0.0663	0.0011	1.2353	0.02	0.1351	0.0036	817	35	817	9	817	20		(Sun et al., 2009)
LGL-3	27	51	0.54	0.0666	0.0015	1.235	0.0267	0.1346	0.0037	824	47	817	12	814	21		(Sun et al., 2009)
LGL-4	103	162	0.64	0.0657	0.0014	1.1944	0.0235	0.1319	0.0036	797	43	798	11	799	20		(Sun et al., 2009)
LGL-5	100	157	0.64	0.0665	0.0011	1.2564	0.0199	0.137	0.0036	822	35	826	9	828	21		(Sun et al., 2009)
LGL-6	32	58	0.56	0.0664	0.0013	1.2531	0.0236	0.1369	0.0037	819	41	825	11	827	21		(Sun et al., 2009)
LGL-7	10	19	0.5	0.0678	0.0023	1.3411	0.0431	0.1435	0.0041	862	68	864	19	865	23		(Sun et al., 2009)
LGL-8	73	111	0.65	0.0669	0.0012	1.2547	0.0209	0.1361	0.0036	834	36	826	9	823	21		(Sun et al., 2009)
LGL-9	33	129	0.26	0.0677	0.0012	1.3312	0.0227	0.1426	0.0038	860	37	859	10	859	21		(Sun et al., 2009)
LGL-10	243	394	0.62	0.0691	0.0011	1.4293	0.0213	0.15	0.004	903	32	901	9	901	22		(Sun et al., 2009)
LGL-11	33	34	0.98	0.0675	0.0015	1.3055	0.0282	0.1403	0.0038	853	47	848	12	847	21		(Sun et al., 2009)
LGL-12	50	89	0.56	0.0658	0.0018	1.1911	0.0312	0.1313	0.0037	800	57	797	14	795	21		(Sun et al., 2009)
LGL-13	85	141	0.6	0.0668	0.0012	1.28	0.0225	0.1389	0.0037	833	38	837	10	839	21		(Sun et al., 2009)
LGL-14	59	94	0.63	0.067	0.0018	1.2757	0.0319	0.1381	0.0038	839	54	835	14	834	22		(Sun et al., 2009)
LGL-15	49	78	0.63	0.0659	0.0013	1.2161	0.022	0.1338	0.0036	804	39	808	10	810	20		(Sun et al., 2009)
LGL-16	53	102	0.52	0.0661	0.0016	1.2229	0.0282	0.1342	0.0037	809	50	811	13	812	21		(Sun et al., 2009)
LGL-17	74	123	0.6	0.0674	0.0015	1.3053	0.0265	0.1405	0.0038	851	44	848	12	847	21		(Sun et al., 2009)
LGL-18	52	76	0.68	0.0659	0.0012	1.1947	0.0213	0.1315	0.0035	803	39	798	10	797	20		(Sun et al., 2009)
LGL-19	45	94	0.48	0.0666	0.0012	1.2755	0.0218	0.139	0.0037	825	37	835	10	839	21		(Sun et al., 2009)
LGL-20	59	94	0.63	0.0649	0.0012	1.1379	0.0198	0.1272	0.0034	772	38	772	9	772	19		(Sun et al., 2009)
LGL-21	56	95	0.59	0.0658	0.0017	1.1922	0.0295	0.1315	0.0036	799	54	797	14	796	21		(Sun et al., 2009)
LGL-22	239	139	1.72	0.0662	0.0012	1.2247	0.0204	0.1341	0.0036	814	36	812	9	811	20		(Sun et al., 2009)
LGL-23	82	120	0.68	0.066	0.0012	1.2176	0.0213	0.1338	0.0036	807	38	809	10	810	20		(Sun et al., 2009)
LGL-24	11	17	0.68	0.0667	0.0025	1.2441	0.0443	0.1353	0.0039	828	76	821	20	818	22		(Sun et al., 2009)
LGL-25	263	223	1.18	0.0671	0.0011	1.28	0.0199	0.1384	0.0037	840	34	837	9	836	21		(Sun et al., 2009)
LGL-26	114	132	0.86	0.0659	0.0012	1.2016	0.0209	0.1323	0.0035	803	38	801	10	801	20		(Sun et al., 2009)
LGL-27	90	132	0.68	0.0658	0.0011	1.1898	0.0195	0.1312	0.0035	800	36	796	9	795	20		(Sun et al., 2009)
LGL-28	43	67	0.64	0.066	0.0022	1.192	0.0372	0.131	0.0037	806	67	797	17	794	21		(Sun et al., 2009)
LGL-29	15	20	0.76	0.069	0.0039	1.4227	0.0767	0.1495	0.005	899	112	899	32	898	28		(Sun et al., 2009)
LGL-30	57	89	0.64	0.0682	0.0012	1.3646	0.0233	0.1452	0.0039	875	37	874	10	874	22		(Sun et al., 2009)
LGL-31	41	71	0.58	0.0645	0.0013	1.1163	0.0219	0.1255	0.0034	760	43	761	10	762	19		(Sun et al., 2009)
LGL-32	43	117	0.37	0.0668	0.0013	1.2725	0.023	0.1382	0.0037	831	39	834	10	835	21		(Sun et al., 2009)
LGL-33	38	60	0.63	0.0642	0.0013	1.0954	0.0201	0.1239	0.0033	747	41	751	10	753	19		(Sun et al., 2009)
LGL-34	37	63	0.59	0.0664	0.0021	1.235	0.0376	0.1349	0.0038	820	66	817	17	816	22		(Sun et al., 2009)
LGL-35	43	78	0.56	0.0655	0.0017	1.1777	0.0287	0.1305	0.0036	790	53	790	13	791	20		(Sun et al., 2009)
LGL-36	34	45	0.75	0.0653	0.0021	1.1577	0.0349	0.1287	0.0036	783	65	781	16	780	21		(Sun et al., 2009)
LGL-37	81	120	0.68	0.0665	0.0018	1.2314	0.0317	0.1343	0.0037	823	56	815	14	812	21		(Sun et al., 2009)
LGL-38	67	141	0.47	0.0656	0.0015	1.1757	0.0252	0.1301	0.0035	793	47	789	12	788	20		(Sun et al., 2009)
LGL-39	34	64	0.53	0.0669	0.0019	1.2717	0.0345	0.1378	0.0038	836	58	833	15	832	22		(Sun et al., 2009)
LGL-40	234	167	1.4	0.0656	0.0011	1.1837	0.0193	0.1308	0.0035	795	36	793	9	793	20		(Sun et al., 2009)
LGL-41	61	109	0.56	0.0635	0.0016	1.0494	0.0249	0.1198	0.0033	726	52	729	12	730	19		(Sun et al., 2009)
LGL-42	46	78	0.6	0.0653	0.0014	1.1711	0.0244	0.1301	0.0035	784	46	787	11	788	20		(Sun et al., 2009)
LGL-43	31	60	0.52	0.0666	0.0022	1.2628	0.0388	0.1376	0.0039	825	66	829	17	831	22		(Sun et al., 2009)
LGL-44	76	89	0.86	0.0644	0.0014	1.1151	0.0229	0.1256	0.0034	756	45	761	11	763	19		(Sun et al., 2009)
LGL-45	120	120	1	0.064	0.0012	1.0632	0.018	0.1204	0.0032	743	38	735	9	733	18		(Sun et al., 2009)
LGL-46	15	20	0.77	0.0661	0.002	1.2257	0.0355	0.1346	0.0037	808	62	812	16	814	21		(Sun et al., 2009)
LGL-47	79	127	0.62	0.0664	0.0021	1.2447	0.037	0.136	0.0038	820	64	821	17	822	22		(Sun et al., 2009)
LGL-48	21	30	0.68	0.0657	0.0017	1.1817	0.0293	0.1304	0.0036	798	54	792	14	790	20		(Sun et al., 2009)
LGL-49	66	91	0.73	0.0648	0.0022	1.1045	0.0362	0.1237	0.0036	767	71	756	17	752	20		(Sun et al., 2009)
LGL-50	125	167	0.75	0.0665	0.0014	1.2517	0.0245	0.1366	0.0037	821	43	824	11	826	21		(Sun et al., 2009)
LGL-51	80	159	0.5	0.0647	0.0012	1.1204	0.0201	0.1256	0.0033	764	40	763	10	763	19		(Sun et al., 2009)
LGL-52	68	105	0.65	0.065	0.0017	1.152	0.0284	0.1286	0.0035	774	54	778	13	780	20		(Sun et al., 2009)
LGL-53	27	32	0.85	0.0655	0.0017	1.1705	0.0286	0.1297	0.0035	790	53	787	13	786	20		(Sun et al., 2009)
LGL-54	36	39	0.93	0.0649	0.0015	1.1464	0.0254	0.1282	0.0035	770	48	776	12	778	20		(Sun et al., 2009)
LGL-55	301	261	1.15	0.0647	0.0012	1.1164	0.0197	0.1253	0.0033	763	39	761	9	761	19		(Sun et al., 2009)
LGL-56	195	125	1.57	0.0649	0.0012	1.1272	0.0201	0.1261	0.0034	770	39	766	10	766	19		(Sun et al., 2009)
LGL-57	33	65	0.5	0.0659	0.0021	1.1936	0.0362	0.1313	0.0037	805	65	798	17	795	21		(Sun et al., 2009)
LGL-58	241	263	0.92	0.0648	0.0018	1.1325	0.0299	0.1268	0.0035	768	58	769	14	770	20		(Sun et al., 2009)
LGL-59	41	96	0.42	0.068	0.0014	1.3563	0.0266	0.1446	0.0039	870	43	870	11	871	22		(Sun et al., 2009)
LGL-60	50	90	0.55	0.0652	0.0013	1.1541	0.0213	0.1284	0.0034	780	41	779	10	779	20		(Sun et al., 2009)
LGL-61	140	113	1.24	0.0651	0.0013	1.152	0.0211	0.1283	0.0034	779	40	778	10	778	19		(Sun et al., 2009)
LGL-62	114	135	0.84	0.0637	0.0016	1.0675	0.0245	0.1215	0.0033	733	51	738	12	739	19		(Sun et al., 2009)
LGL-63	103	93	1.11	0.0661	0.0015	1.2101	0.0266	0.1328	0.0036	809	48	805	12	804	20		(Sun et al., 2009)
LGL-64	34	54	0.63	0.0658	0.0018	1.1851	0.0304	0.1307	0.0036	800	56	794	14	792	20		(Sun et al., 2009)
LGL-65	124	117	1.05	0.066	0.0016	1.2057	0.0272	0.1326	0.0035	805	49	803	13	803	20		(Sun et al., 2009)
LGL-66	60	90	0.67	0.0648	0.0013	1.1363	0.0219	0.1272	0.0034	767	42	771	10	772	19		(Sun et al., 2009)
LGL-67	133	164	0.81	0.0658	0.0012	1.0492	0.0186	0.1156	0.0031	801	39	729	9	705	18		(Sun et al., 2009)
LGL-68	21	56	0.37	0.0632	0.0018	1.2023	0.0322	0.1381	0.0038	713	59	802	15	834	22		(Sun et al., 2009)
LGL-69	40	62	0.65	0.0652	0.0014	1.1472	0.0238	0.1276	0.0034	782	45	776	11	774	20		(Sun et al., 2009)
LGL-70	130	105	1.24	0.0652	0.0014	1.1698	0.0234	0.1301	0.0035	781	44	787	11	789	20		(Sun et al., 2009)
LGL-71	49	83	0.59	0.0638	0.0017	1.0557	0.027	0.1201	0.0033	734	56	732	13	731	19		(Sun et al., 2009)
LGL-72	61	104	0.59	0.0658	0.0013	1.202	0.0227	0.1326	0.0035	798	41	802	10	803	20		(Sun et al., 2009)
LGL-73	694	586	1.18	0.0659	0.0012	1.2007	0.0205	0.1323	0.0035	802	38	801	9	801	20		(Sun et al., 2009)
LGL-74	439	821	0.53	0.071	0.0012	0.898	0.0145	0.0917	0.0024	958	35	651	8	566	14		(Sun et al., 2009)
LGL-75	341	520	0.66	0.0656	0.0015	1.1744	0.0248	0.1299	0.0035	794	46	789	12	787	20		(Sun et al., 2009)
LGL-76	263	329	0.8	0.0639	0.0012	1.0791	0.0182	0.1224	0.0032	739	38	743	9	745	19		(Sun et al., 2009)
LGL-77	601	770	0.78	0.0648	0.0016	1.0909	0.0251	0.1222	0.0033	767	50	749	12	743	19		(Sun et al., 2009)
LGL-78	125	148	0.85	0.0765	0.0016	1.162	0.0229	0.1101	0.003	1109	41	783	11	674	17		(Sun et al., 2009)
LGL-79	478	1867	0.26	0.0791	0.002	1.0203	0.0246	0.0936	0.0026	1174	50	714	12	577	15		(Sun et al., 2009)
LGL-80	304	769	0.4	0.0721	0.0017	1.3026	0.028	0.131	0.0035	989	46	847	12	794	20		(Sun et al., 2009)
ZDS (Ediacaran strata) (N26.38.27, E101.35.18)
ZDS-1	34	42	0.81	0.0642	0.0018	1.0809	0.0285	0.1222	0.0034	747	58	744	14	743	19		(Sun et al., 2009)
ZDS-2	33	33	1.01	0.065	0.0017	1.1375	0.0274	0.1269	0.0035	774	53	771	13	770	20		(Sun et al., 2009)
ZDS-3	105	86	1.22	0.0647	0.0016	1.1255	0.0257	0.1261	0.0034	765	50	766	12	766	20		(Sun et al., 2009)
ZDS-4	111	100	1.11	0.0637	0.0017	1.0543	0.0259	0.12	0.0033	733	54	731	13	731	19		(Sun et al., 2009)
ZDS-5	15	25	0.59	0.0683	0.0018	1.365	0.0332	0.1449	0.004	879	52	874	14	872	22		(Sun et al., 2009)
ZDS-6	234	264	0.89	0.0662	0.0013	1.2307	0.022	0.1348	0.0036	813	39	815	10	815	20		(Sun et al., 2009)
ZDS-7	137	97	1.41	0.0642	0.0016	1.0959	0.0259	0.1238	0.0034	747	52	751	13	753	19		(Sun et al., 2009)
ZDS-8	36	35	1.01	0.0663	0.0021	1.2243	0.0359	0.1339	0.0038	816	63	812	16	810	21		(Sun et al., 2009)
ZDS-9	65	98	0.67	0.0655	0.0012	1.182	0.0199	0.1309	0.0035	790	37	792	9	793	20		(Sun et al., 2009)
ZDS-10	56	71	0.79	0.0663	0.0022	1.2399	0.0386	0.1356	0.0039	816	67	819	18	820	22		(Sun et al., 2009)
ZDS-11	95	595	0.16	0.1045	0.0016	3.5889	0.0516	0.249	0.0066	1706	28	1547	11	1433	34		(Sun et al., 2009)
ZDS-12	34	61	0.56	0.0714	0.0017	1.5996	0.0364	0.1625	0.0045	968	48	970	14	971	25		(Sun et al., 2009)
ZDS-13	32	30	1.07	0.0774	0.0025	1.4393	0.0429	0.1348	0.0039	1132	62	905	18	815	22		(Sun et al., 2009)
ZDS-14	161	449	0.36	0.1198	0.0019	5.8621	0.0859	0.3547	0.0094	1953	28	1956	13	1957	45		(Sun et al., 2009)
ZDS-15	41	56	0.72	0.0683	0.0021	1.3465	0.0389	0.1429	0.004	877	62	866	17	861	23		(Sun et al., 2009)
ZDS-16	35	38	0.94	0.0649	0.0018	1.1361	0.0293	0.1269	0.0035	772	56	771	14	770	20		(Sun et al., 2009)
ZDS-17	40	35	1.12	0.0656	0.0026	1.1854	0.0449	0.1311	0.0039	793	81	794	21	794	22		(Sun et al., 2009)
ZDS-18	25	29	0.86	0.0659	0.002	1.1984	0.0342	0.1319	0.0037	802	62	800	16	799	21		(Sun et al., 2009)
ZDS-19	105	150	0.7	0.0721	0.0013	1.6417	0.0282	0.165	0.0044	990	37	986	11	984	24		(Sun et al., 2009)
ZDS-20	40	120	0.33	0.068	0.0017	1.3618	0.0329	0.1452	0.004	868	52	873	14	874	23		(Sun et al., 2009)
ZDS-21	69	48	1.43	0.0748	0.0019	1.2042	0.0288	0.1167	0.0032	1063	50	803	13	712	19		(Sun et al., 2009)
ZDS-22	33	47	0.7	0.0653	0.0017	1.1747	0.0296	0.1304	0.0036	784	55	789	14	790	21		(Sun et al., 2009)
ZDS-23	166	194	0.85	0.0683	0.0012	1.3884	0.0238	0.1474	0.004	877	37	884	10	886	22		(Sun et al., 2009)
ZDS-24	45	68	0.66	0.07	0.0013	1.4918	0.0265	0.1544	0.0042	930	38	927	11	926	23		(Sun et al., 2009)
ZDS-25	94	107	0.88	0.065	0.0017	1.1515	0.0278	0.1283	0.0036	775	53	778	13	778	20		(Sun et al., 2009)
ZDS-26	60	77	0.78	0.0672	0.002	1.2966	0.0368	0.1399	0.004	843	61	844	16	844	23		(Sun et al., 2009)
ZDS-27	117	117	1	0.0658	0.0025	1.2137	0.0443	0.1337	0.004	800	78	807	20	809	23		(Sun et al., 2009)
ZDS-28	42	61	0.69	0.0693	0.0023	1.4338	0.0449	0.1499	0.0044	908	67	903	19	901	24		(Sun et al., 2009)
ZDS-29	79	115	0.69	0.071	0.0019	1.595	0.0404	0.1629	0.0046	956	54	968	16	973	25		(Sun et al., 2009)
ZDS-30	159	123	1.29	0.0643	0.0014	1.1038	0.023	0.1244	0.0034	753	46	755	11	756	19		(Sun et al., 2009)
ZDS-31	97	97	1	0.066	0.0016	1.2289	0.0281	0.1349	0.0037	807	50	814	13	816	21		(Sun et al., 2009)
ZDS-32	117	106	1.11	0.0635	0.0014	1.0395	0.0219	0.1187	0.0033	725	46	724	11	723	19		(Sun et al., 2009)
ZDS-33	103	106	0.96	0.0646	0.0018	1.1294	0.0297	0.1267	0.0036	761	57	767	14	769	20		(Sun et al., 2009)
ZDS-34	81	78	1.05	0.0662	0.0023	1.2088	0.0393	0.1325	0.0039	811	70	805	18	802	22		(Sun et al., 2009)
ZDS-35	29	36	0.82	0.0651	0.0023	1.1378	0.0373	0.1267	0.0037	777	71	772	18	769	21		(Sun et al., 2009)
ZDS-36	222	302	0.73	0.0659	0.0013	1.328	0.0254	0.1461	0.004	803	42	858	11	879	22		(Sun et al., 2009)
ZDS-37	44	46	0.97	0.0645	0.002	1.1077	0.0318	0.1245	0.0036	758	62	757	15	756	20		(Sun et al., 2009)
ZDS-38	70	153	0.46	0.0699	0.0015	1.4975	0.031	0.1552	0.0043	926	44	929	13	930	24		(Sun et al., 2009)
ZDS-39	56	75	0.75	0.0669	0.0017	1.27	0.0302	0.1376	0.0038	835	51	832	14	831	22		(Sun et al., 2009)
ZDS-40	92	77	1.2	0.0639	0.0018	1.0771	0.0283	0.1222	0.0035	737	57	742	14	743	20		(Sun et al., 2009)
ZDS-41	42	58	0.72	0.0688	0.0023	1.3988	0.0437	0.1475	0.0043	892	66	888	18	887	24		(Sun et al., 2009)
ZDS-42	93	87	1.07	0.0677	0.0013	1.3396	0.0248	0.1435	0.0039	859	40	863	11	864	22		(Sun et al., 2009)
ZDS-43	88	229	0.39	0.1213	0.0021	6.0657	0.1003	0.3625	0.0099	1976	31	1985	14	1994	47		(Sun et al., 2009)
ZDS-44	72	69	1.05	0.0671	0.0015	1.295	0.0269	0.14	0.0039	839	45	844	12	845	22		(Sun et al., 2009)
ZDS-45	144	226	0.64	0.0652	0.0014	1.1495	0.0233	0.1279	0.0035	780	44	777	11	776	20		(Sun et al., 2009)
ZDS-46	146	140	1.04	0.0656	0.0017	1.192	0.0286	0.1318	0.0037	793	52	797	13	798	21		(Sun et al., 2009)
ZDS-47	67	57	1.17	0.0646	0.0027	1.1509	0.0463	0.1292	0.004	762	87	778	22	783	23		(Sun et al., 2009)
ZDS-48	184	245	0.75	0.066	0.0015	1.2426	0.0268	0.1364	0.0038	807	47	820	12	825	22		(Sun et al., 2009)
ZDS-49	25	57	0.44	0.0707	0.0015	1.5519	0.0312	0.1592	0.0044	949	43	951	12	952	24		(Sun et al., 2009)
ZDS-50	29	77	0.38	0.0669	0.0028	1.2709	0.0508	0.1377	0.0043	836	85	833	23	832	24		(Sun et al., 2009)
ZDS-51	165	145	1.14	0.0672	0.0022	1.2854	0.04	0.1388	0.0041	843	67	839	18	838	23		(Sun et al., 2009)
ZDS-52	31	39	0.79	0.0664	0.0019	1.2285	0.0338	0.1342	0.0039	818	59	814	15	812	22		(Sun et al., 2009)
ZDS-53	91	162	0.56	0.0672	0.0013	1.3065	0.0237	0.141	0.0039	845	39	849	10	850	22		(Sun et al., 2009)
ZDS-55	106	105	1.01	0.064	0.0015	1.1007	0.0249	0.1247	0.0035	742	49	754	12	758	20		(Sun et al., 2009)
ZDS-56	112	149	0.75	0.1598	0.003	10.6588	0.1899	0.4839	0.0134	2453	31	2494	17	2544	58		(Sun et al., 2009)
ZDS-57	96	68	1.41	0.0659	0.0015	1.2003	0.0263	0.1322	0.0037	803	47	801	12	800	21		(Sun et al., 2009)
ZDS-58	115	143	0.8	0.0662	0.0015	1.2327	0.0272	0.1351	0.0038	813	48	816	12	817	22		(Sun et al., 2009)
ZDS-59	95	63	1.5	0.0622	0.0014	1.1218	0.0238	0.1309	0.0037	680	47	764	11	793	21		(Sun et al., 2009)
ZDS-60	95	96	1	0.0659	0.0019	1.217	0.0332	0.1341	0.0039	802	59	808	15	811	22		(Sun et al., 2009)
KM-7-1 (Ediacaran Chengjiang Formation)
KM-7-1-1			0.39	0.06778	0.00098	1.21309	0.01799	0.12981	0.00152	862	31	807	8	787	9		(Wang et al., 2012)
KM-7-1-2			1.09	0.20026	0.00278	14.6002	0.21847	0.52877	0.00678	2828	23	2790	14	2736	29		(Wang et al., 2012)
KM-7-1-3			0.74	0.0677	0.00102	1.20765	0.01845	0.12939	0.00152	859	32	804	8	784	9		(Wang et al., 2012)
KM-7-1-4			2.05	0.06976	0.00117	1.12253	0.01828	0.11671	0.00131	921	35	764	9	712	8		(Wang et al., 2012)
KM-7-1-5			0.44	0.067	0.00091	1.28023	0.01796	0.13859	0.0016	838	29	837	8	837	9		(Wang et al., 2012)
KM-7-1-6			0.71	0.07057	0.00098	1.21037	0.0174	0.1244	0.00145	945	29	805	8	756	8		(Wang et al., 2012)
KM-7-1-7			0.69	0.06576	0.0014	1.19548	0.02522	0.13187	0.00174	799	46	798	12	799	10		(Wang et al., 2012)
KM-7-1-8			0.64	0.07155	0.00104	1.2823	0.01934	0.12999	0.00155	973	30	838	9	788	9		(Wang et al., 2012)
KM-7-1-9			0.69	0.06818	0.00111	1.30122	0.02136	0.13844	0.00166	874	34	846	9	836	9		(Wang et al., 2012)
KM-7-1-10			0.58	0.066	0.0011	1.20845	0.01988	0.1328	0.00152	806	36	804	9	804	9		(Wang et al., 2012)
KM-7-1-12			0.92	0.06629	0.00134	1.21741	0.02535	0.13321	0.00188	816	43	809	12	806	11		(Wang et al., 2012)
KM-7-1-13			0.23	0.2557	0.0046	21.7652	0.29882	0.61736	0.00718	3220	29	3173	13	3099	29		(Wang et al., 2012)
KM-7-1-14			3	0.08452	0.00112	1.24507	0.01758	0.10686	0.00128	1305	26	821	8	654	7		(Wang et al., 2012)
KM-7-1-15			0.75	0.07463	0.00102	0.97803	0.01399	0.09506	0.00112	1059	28	693	7	585	7		(Wang et al., 2012)
KM-7-1-17			0.61	0.06649	0.00108	1.24172	0.02042	0.13548	0.00162	822	35	820	9	819	9		(Wang et al., 2012)
KM-7-1-19			1.34	0.06778	0.00134	1.25533	0.0253	0.13433	0.00183	862	42	826	11	813	10		(Wang et al., 2012)
KM-7-1-20			1.28	0.07341	0.00171	1.07967	0.02467	0.10668	0.00145	1025	48	743	12	653	8		(Wang et al., 2012)
KM-7-1-21			0.88	0.06879	0.0014	1.26498	0.02616	0.13339	0.00183	892	43	830	12	807	10		(Wang et al., 2012)
KM-7-1-22			1.42	0.07387	0.00107	1.2569	0.01902	0.12341	0.00148	1038	30	827	9	750	8		(Wang et al., 2012)
KM-7-1-22R			1.25	0.06877	0.00106	1.25078	0.01996	0.13192	0.0016	892	33	824	9	799	9		(Wang et al., 2012)
KM-7-1-23			NAN	0.06541	0.00231	1.16266	0.03942	0.12894	0.00201	788	76	783	19	782	11		(Wang et al., 2012)
KM-7-1-25			NAN	0.06638	0.00113	1.23731	0.02067	0.13521	0.00157	818	36	818	9	818	9		(Wang et al., 2012)
KM-7-1-26			NAN	0.07314	0.00146	0.82485	0.01662	0.0818	0.0011	1018	41	611	9	507	7		(Wang et al., 2012)
KM-7-1-27			NAN	0.19062	0.00286	13.674	0.22402	0.52035	0.00698	2748	25	2727	16	2701	30		(Wang et al., 2012)
KM-7-1-28			NAN	0.06694	0.00122	1.27551	0.02327	0.1382	0.00172	836	39	835	10	834	10		(Wang et al., 2012)
KM-7-1-29			NAN	0.06898	0.00129	1.23007	0.024	0.12935	0.00179	898	39	814	11	784	10		(Wang et al., 2012)
KM-7-1-30			NAN	0.06921	0.00131	1.28194	0.02396	0.13436	0.00167	905	40	838	11	813	9		(Wang et al., 2012)
KM-7-1-31			NAN	0.06822	0.00129	1.20911	0.02254	0.12855	0.00159	875	40	805	10	780	9		(Wang et al., 2012)
KM-7-1-33			NAN	0.06812	0.00122	1.15831	0.02071	0.12334	0.00153	872	38	781	10	750	9		(Wang et al., 2012)
KM-7-1-35			NAN	0.0666	0.00114	1.15302	0.02002	0.12557	0.00156	825	37	779	9	763	9		(Wang et al., 2012)
KM-7-1-36			NAN	0.067	0.00133	1.27737	0.02572	0.13828	0.00185	838	42	836	11	835	10		(Wang et al., 2012)
KM-7-1-38			0.9	0.06571	0.00114	1.13887	0.02	0.1257	0.00156	797	37	772	9	763	9		(Wang et al., 2012)
KM-7-1-39			0.61	0.0654	0.00132	1.16832	0.02449	0.12958	0.00184	787	43	786	11	785	11		(Wang et al., 2012)
KM-7-1-40			0.59	0.06625	0.00089	1.21214	0.01673	0.13271	0.00151	814	29	806	8	803	9		(Wang et al., 2012)
KM-7-1-41			0.58	0.129	0.00181	6.72911	0.09418	0.37834	0.00427	2084	25	2076	12	2069	20		(Wang et al., 2012)
KM-7-1-42			0.85	0.06736	0.00094	1.22929	0.01777	0.13236	0.00155	849	30	814	8	801	9		(Wang et al., 2012)
KM-7-1-43			0.93	0.06584	0.00172	1.19855	0.0311	0.13203	0.00198	801	56	800	14	799	11		(Wang et al., 2012)
KM-7-1-44			1.11	0.05914	0.00598	0.5583	0.05567	0.06847	0.00113	572	229	450	36	427	7		(Wang et al., 2012)
KM-7-1-45			0.49	0.06706	0.00096	1.19714	0.01782	0.12948	0.00154	840	30	799	8	785	9		(Wang et al., 2012)
KM-7-1-46			0.52	0.06695	0.00109	1.25211	0.0205	0.13565	0.00162	836	35	824	9	820	9		(Wang et al., 2012)
KM-7-1-49			0.63	0.07101	0.00105	1.12479	0.01733	0.1149	0.00139	958	31	765	8	701	8		(Wang et al., 2012)
KM-7-1-55			0.28	0.06659	0.00104	1.17968	0.01879	0.1285	0.00154	825	33	791	9	779	9		(Wang et al., 2012)
KM-7-1-56			1.71	0.06616	0.00118	1.12484	0.01997	0.12332	0.00149	811	38	765	10	750	9		(Wang et al., 2012)
KM-7-1-59			0.29	0.1782	0.00236	11.942	0.1663	0.48604	0.00572	2636	23	2600	13	2554	25		(Wang et al., 2012)
KM-7-1-61			1.18	0.06686	0.00133	1.27303	0.02689	0.13809	0.00204	833	42	834	12	834	12		(Wang et al., 2012)
KM-7-1-63			0.68	0.11517	0.00173	5.19581	0.08003	0.32721	0.00397	1883	28	1852	13	1825	19		(Wang et al., 2012)
KM-7-1-66			0.72	0.06651	0.00184	1.22986	0.03387	0.13412	0.00212	822	59	814	15	811	12		(Wang et al., 2012)
KM-7-1-70			1.06	0.19547	0.00292	13.4786	0.2083	0.50014	0.0062	2789	25	2714	15	2614	27		(Wang et al., 2012)
KM-7-1-71			3.84	0.10211	0.0026	3.10493	0.07738	0.22055	0.00338	1663	48	1434	19	1285	18		(Wang et al., 2012)
KM-7-1-74			0.5	0.06561	0.00287	1.12496	0.04785	0.12437	0.00245	794	94	765	23	756	14		(Wang et al., 2012)
KM-7-1-75			0.73	0.1181	0.00241	5.58195	0.11581	0.34284	0.00469	1928	37	1913	18	1900	23		(Wang et al., 2012)
KM-10-1 (Ediacaran Chengjiang Formation)
KM-10-1-1			1.17	0.1139	0.0017	5.26107	0.08634	0.33505	0.00449	1863	28	1863	14	1863	22		(Wang et al., 2012)
KM-10-1-3			1.01	0.075	0.00211	1.32249	0.03573	0.12805	0.00186	1069	58	856	16	777	11		(Wang et al., 2012)
KM-10-1-4			0.55	0.06693	0.00141	1.2449	0.02691	0.13492	0.00193	836	45	821	12	816	11		(Wang et al., 2012)
KM-10-1-6			0.32	0.06761	0.00125	1.30294	0.02478	0.13978	0.00187	857	39	847	11	843	11		(Wang et al., 2012)
KM-10-1-7			0.34	0.1483	0.00237	8.66935	0.14771	0.42402	0.0057	2326	28	2304	16	2279	26		(Wang et al., 2012)
KM-10-1-8			0.56	0.0661	0.00164	1.20771	0.0297	0.13253	0.00191	810	53	804	14	802	11		(Wang et al., 2012)
KM-10-1-9			0.57	0.06882	0.00169	1.17596	0.02978	0.12396	0.00196	893	52	789	14	753	11		(Wang et al., 2012)
KM-10-1-10			0.54	0.14611	0.00225	7.38429	0.11534	0.36659	0.00439	2301	27	2159	14	2013	21		(Wang et al., 2012)
KM-10-1-11			0.42	0.06933	0.00128	1.25178	0.02332	0.13096	0.00169	909	39	824	11	793	10		(Wang et al., 2012)
KM-10-1-14			0.29	0.06813	0.00146	1.32486	0.02911	0.14105	0.00204	873	45	857	13	851	12		(Wang et al., 2012)
KM-10-1-15			0.75	0.18027	0.00298	12.353	0.22085	0.49705	0.0069	2655	28	2632	17	2601	30		(Wang et al., 2012)
KM-10-1-18			0.38	0.06731	0.00133	1.31268	0.0254	0.14145	0.00171	847	42	851	11	853	10		(Wang et al., 2012)
KM-10-1-20			1.01	0.07086	0.00173	1.46962	0.03697	0.15044	0.00239	953	51	918	15	903	13		(Wang et al., 2012)
KM-10-1-21			0.27	0.13374	0.00193	7.44986	0.114	0.40404	0.005	2148	26	2167	14	2188	23		(Wang et al., 2012)
KM-10-1-22			0.77	0.06671	0.00126	1.16477	0.02224	0.12664	0.00163	829	40	784	10	769	9		(Wang et al., 2012)
KM-10-1-23			0.45	0.06656	0.00115	1.25094	0.02188	0.13631	0.00168	824	37	824	10	824	10		(Wang et al., 2012)
KM-10-1-24			0.63	0.20287	0.00348	15.2897	0.27115	0.54667	0.00718	2849	29	2833	17	2811	30		(Wang et al., 2012)
KM-10-1-27			0.67	0.06657	0.00121	1.24547	0.02324	0.1357	0.00176	824	39	821	11	820	10		(Wang et al., 2012)
KM-10-1-31			0.82	0.06701	0.00151	1.27404	0.02828	0.1379	0.00177	838	48	834	13	833	10		(Wang et al., 2012)
KM-10-1-32			0.88	0.11201	0.00209	4.98933	0.09379	0.32308	0.00419	1832	35	1818	16	1805	20		(Wang et al., 2012)
KM-10-1-33			1.27	0.18722	0.00334	12.8208	0.24505	0.4967	0.00745	2718	30	2667	18	2600	32		(Wang et al., 2012)
KM-10-1-35			0.64	0.14909	0.00381	8.61364	0.1883	0.41903	0.00553	2335	45	2298	20	2256	25		(Wang et al., 2012)
KM-10-1-36			0.4	0.0663	0.001	1.20927	0.01928	0.1323	0.00166	816	32	805	9	801	9		(Wang et al., 2012)
KM-10-1-37			0.24	0.06731	0.00118	1.302	0.02455	0.1403	0.00198	847	37	847	11	846	11		(Wang et al., 2012)
KM-10-1-38			1.48	0.06704	0.00095	1.21699	0.01843	0.13167	0.00163	839	30	808	8	797	9		(Wang et al., 2012)
KM-10-1-41			0.9	0.11968	0.00165	5.79458	0.08428	0.35119	0.00421	1951	25	1946	13	1940	20		(Wang et al., 2012)
KM-10-1-43			0.75	0.06625	0.00166	1.21095	0.03066	0.13259	0.00203	814	54	806	14	803	12		(Wang et al., 2012)
KM-10-1-45			1.01	0.17	0.00249	11.114	0.17116	0.47422	0.00596	2558	25	2533	14	2502	26		(Wang et al., 2012)
KM-10-1-47			0.29	0.06821	0.00117	1.3664	0.02395	0.14531	0.00184	875	36	875	10	875	10		(Wang et al., 2012)
KM-10-1-48			3.4	0.15922	0.00259	9.27179	0.16118	0.42241	0.00569	2447	28	2365	16	2271	26		(Wang et al., 2012)
KM-10-1-52			1.07	0.11501	0.00164	5.26577	0.07893	0.33211	0.00403	1880	26	1863	13	1849	20		(Wang et al., 2012)
KM-10-1-54			1	0.06818	0.00101	1.34483	0.02101	0.14308	0.00177	874	31	865	9	862	10		(Wang et al., 2012)
KM-10-1-55			0.78	0.11255	0.00162	5.20843	0.08	0.33565	0.0042	1841	27	1854	13	1866	20		(Wang et al., 2012)
KM-10-1-56			0.45	0.11553	0.00166	5.4854	0.08316	0.3444	0.0042	1888	26	1898	13	1908	20		(Wang et al., 2012)
KM-10-1-57			0.93	0.11402	0.00174	5.23664	0.08338	0.33313	0.00415	1864	28	1859	14	1854	20		(Wang et al., 2012)
KM-10-1-58			0.91	0.11431	0.00183	5.19223	0.08482	0.32944	0.00402	1869	30	1851	14	1836	19		(Wang et al., 2012)
KM-10-1-61			1.09	0.06538	0.00147	1.14648	0.02646	0.12718	0.00189	787	48	776	13	772	11		(Wang et al., 2012)
KM-10-1-65			0.75	0.06607	0.00199	1.2224	0.0357	0.1342	0.00201	809	65	811	16	812	11		(Wang et al., 2012)
KM-10-1-69			0.68	0.1386	0.00226	7.03637	0.11782	0.36822	0.00455	2210	29	2116	15	2021	21		(Wang et al., 2012)
KM-10-1-70			0.65	0.11008	0.00202	5.02287	0.0922	0.33094	0.00415	1801	34	1823	16	1843	20		(Wang et al., 2012)
KM-10-1-71			0.7	0.0675	0.00138	1.26108	0.02599	0.1355	0.00181	853	43	828	12	819	10		(Wang et al., 2012)
KM-22-3 (Ediacaran Chengjiang Formation)
KM-22-3-1			0.31	0.13821	0.00177	7.56402	0.09982	0.39699	0.00453	2205	23	2181	12	2155	21		(Wang et al., 2012)
KM-22-3-2			1.86	0.07243	0.00107	1.07187	0.01752	0.10734	0.00143	998	31	740	9	657	8		(Wang et al., 2012)
KM-22-3-3			0.37	0.06725	0.00124	1.29609	0.02583	0.13975	0.00203	846	39	844	11	843	11		(Wang et al., 2012)
KM-22-3-4			0.26	0.06793	0.00085	1.30125	0.01712	0.13895	0.00159	866	27	846	8	839	9		(Wang et al., 2012)
KM-22-3-6			0.96	0.16153	0.00287	10.4141	0.19792	0.46757	0.00693	2472	31	2472	18	2473	30		(Wang et al., 2012)
KM-22-3-7			0.57	0.11482	0.0017	5.32895	0.08612	0.3366	0.00444	1877	27	1874	14	1870	21		(Wang et al., 2012)
KM-22-3-8			0.47	0.06752	0.00092	1.25394	0.01824	0.13471	0.00163	854	29	825	8	815	9		(Wang et al., 2012)
KM-22-3-9			1.28	0.0672	0.00094	1.15738	0.01747	0.12492	0.00155	844	30	781	8	759	9		(Wang et al., 2012)
KM-22-3-11			0.54	0.15094	0.00207	8.91632	0.12763	0.42847	0.00507	2357	24	2329	13	2299	23		(Wang et al., 2012)
KM-22-3-12			0.7	0.06638	0.0011	1.20312	0.02137	0.13146	0.00176	818	35	802	10	796	10		(Wang et al., 2012)
KM-22-3-13			0.7	0.0671	0.00094	1.21313	0.01807	0.13113	0.0016	841	30	807	8	794	9		(Wang et al., 2012)
KM-22-3-14			0.52	0.06754	0.00101	1.24571	0.0192	0.13379	0.0016	854	32	821	9	809	9		(Wang et al., 2012)
KM-22-3-16			0.69	0.06743	0.00114	1.2089	0.02072	0.13005	0.0016	851	36	805	10	788	9		(Wang et al., 2012)
KM-22-3-17			1.02	0.11377	0.00175	5.09923	0.08337	0.32509	0.00419	1860	28	1836	14	1815	20		(Wang et al., 2012)
KM-22-3-18			0.74	0.06608	0.00121	1.20562	0.02246	0.13234	0.00172	809	39	803	10	801	10		(Wang et al., 2012)
KM-22-3-19			0.71	0.06579	0.00113	1.19188	0.02136	0.1314	0.00173	800	37	797	10	796	10		(Wang et al., 2012)
KM-22-3-20			1.64	0.1854	0.0041	13.2922	0.30222	0.52001	0.00813	2702	37	2701	21	2699	34		(Wang et al., 2012)
KM-22-3-23			0.44	0.06624	0.00126	1.22233	0.0233	0.13385	0.00169	814	41	811	11	810	10		(Wang et al., 2012)
KM-22-3-25			0.63	0.06662	0.00127	1.21514	0.02371	0.13229	0.00178	826	41	808	11	801	10		(Wang et al., 2012)
KM-22-3-26			0.5	0.1164	0.00205	5.24038	0.09495	0.32654	0.00423	1902	32	1859	15	1822	21		(Wang et al., 2012)
KM-22-3-27			0.66	0.06673	0.00261	1.25774	0.04836	0.13672	0.00269	829	84	827	22	826	15		(Wang et al., 2012)
KM-22-3-28			0.5	0.11402	0.00269	5.26634	0.1266	0.33501	0.00508	1864	44	1863	21	1863	25		(Wang et al., 2012)
KM-22-3-30			0.62	0.09166	0.00303	3.20741	0.1053	0.25381	0.00456	1460	64	1459	25	1458	23		(Wang et al., 2012)
KM-22-3-31			0.58	0.06745	0.00093	1.28461	0.01883	0.13814	0.00169	852	29	839	8	834	10		(Wang et al., 2012)
KM-22-3-35			1.26	0.07073	0.02286	1.41162	0.43364	0.14477	0.01623	950	670	894	183	872	91		(Wang et al., 2012)
KM-22-3-38			0.39	0.0677	0.00086	1.3254	0.01799	0.142	0.00168	859	27	857	8	856	9		(Wang et al., 2012)
KM-22-3-44			0.61	0.11279	0.0016	5.07898	0.07331	0.3266	0.00379	1845	26	1833	12	1822	18		(Wang et al., 2012)
KM-22-3-45			0.43	0.15011	0.00201	9.09198	0.13179	0.43931	0.00542	2347	23	2347	13	2348	24		(Wang et al., 2012)
KM-22-3-47			0.73	0.06608	0.00093	1.20632	0.01805	0.13241	0.00162	809	30	803	8	802	9		(Wang et al., 2012)
KM-22-3-52			0.41	0.06771	0.00128	1.33044	0.02504	0.14253	0.0018	860	40	859	11	859	10		(Wang et al., 2012)
KM-22-3-53			1.21	0.16216	0.00215	10.5871	0.14967	0.47356	0.00569	2478	23	2488	13	2499	25		(Wang et al., 2012)
KM-22-3-55			0.54	0.06612	0.00105	1.24372	0.02077	0.13643	0.00174	810	34	821	9	824	10		(Wang et al., 2012)
KM-22-3-62			0.7	0.09227	0.00158	3.18629	0.05563	0.25048	0.00323	1473	33	1454	13	1441	17		(Wang et al., 2012)
KM-22-3-63			1.27	0.06635	0.00107	1.16129	0.01957	0.12694	0.00162	817	34	783	9	770	9		(Wang et al., 2012)
KM-22-3-64			0.63	0.22098	0.00363	17.9578	0.29405	0.58943	0.00705	2988	27	2987	16	2987	29		(Wang et al., 2012)
KM-22-3-65			0.74	0.06787	0.00104	1.24079	0.0198	0.13261	0.00164	865	33	819	9	803	9		(Wang et al., 2012)
KM-22-3-66			0.4	0.11859	0.0016	5.71063	0.0825	0.34929	0.00424	1935	25	1933	12	1931	20		(Wang et al., 2012)
KM-22-3-68			0.46	0.06597	0.00099	1.12792	0.01762	0.12402	0.00151	805	32	767	8	754	9		(Wang et al., 2012)
KM-22-3-73			0.41	0.0697	0.00119	1.33778	0.0236	0.13922	0.00181	920	36	862	10	840	10		(Wang et al., 2012)
KM-22-3-75			0.68	0.11305	0.00164	5.0556	0.07628	0.32438	0.00392	1849	27	1829	13	1811	19		(Wang et al., 2012)
KM-22-3-76			0.33	0.06751	0.00132	1.31651	0.02635	0.14144	0.00193	854	42	853	12	853	11		(Wang et al., 2012)
KM-22-3-80			0.38	0.06732	0.00105	1.26429	0.02038	0.13623	0.00168	848	33	830	9	823	10		(Wang et al., 2012)
KM-22-3-81			0.68	0.1288	0.00201	6.45512	0.10305	0.36352	0.00444	2082	28	2040	14	1999	21		(Wang et al., 2012)
KM-22-3-82			0.92	0.06737	0.00107	1.18273	0.01937	0.12734	0.00159	849	34	793	9	773	9		(Wang et al., 2012)
KM-22-3-83			0.84	0.14701	0.00274	8.05871	0.15337	0.39759	0.00527	2311	33	2238	17	2158	24		(Wang et al., 2012)
KM-22-3-85			0.41	0.06616	0.00116	1.21666	0.02142	0.13339	0.00166	811	38	808	10	807	9		(Wang et al., 2012)
KM-22-3-87			0.36	0.06701	0.00118	1.25354	0.02246	0.13569	0.00172	838	38	825	10	820	10		(Wang et al., 2012)
KM-4-1 (Ediacaran Doushantuo Formation)
KM-4-1-1			0.52	0.15906	0.00222	10.1068	0.14477	0.46089	0.00537	2446	24	2445	13	2443	24		(Wang et al., 2012)
KM-4-1-2			0.41	0.1455	0.00202	8.56533	0.12215	0.427	0.00495	2294	24	2293	13	2292	22		(Wang et al., 2012)
KM-4-1-3			0.27	0.11318	0.00297	5.10891	0.13763	0.32741	0.00546	1851	49	1838	23	1826	27		(Wang et al., 2012)
KM-4-1-4			0.21	0.11425	0.00222	5.276	0.10884	0.33501	0.00496	1868	36	1865	18	1863	24		(Wang et al., 2012)
KM-4-1-5			0.58	0.10173	0.00626	3.58429	0.21411	0.25554	0.00377	1656	117	1546	47	1467	19		(Wang et al., 2012)
KM-4-1-6			0.26	0.11373	0.00263	4.89997	0.11734	0.31257	0.00491	1860	43	1802	20	1753	24		(Wang et al., 2012)
KM-4-1-7			0.47	0.06744	0.00102	1.31207	0.02059	0.14112	0.00173	851	32	851	9	851	10		(Wang et al., 2012)
KM-4-1-8			0.32	0.11357	0.00167	5.01456	0.07728	0.32026	0.00393	1857	27	1822	13	1791	19		(Wang et al., 2012)
KM-4-1-9			0.61	0.11209	0.00169	4.9922	0.07822	0.32306	0.00394	1834	28	1818	13	1805	19		(Wang et al., 2012)
KM-4-1-10			0.59	0.11241	0.00169	4.86523	0.07702	0.31394	0.0039	1839	28	1796	13	1760	19		(Wang et al., 2012)
KM-4-1-11			0.3	0.17686	0.00377	4.5359	0.07779	0.18601	0.00236	2624	36	1738	14	1100	13		(Wang et al., 2012)
KM-4-1-12			1.12	0.11468	0.00159	5.33461	0.07705	0.3374	0.00402	1875	26	1874	12	1874	19		(Wang et al., 2012)
KM-4-1-13			0.69	0.11462	0.00158	5.25178	0.0749	0.33234	0.0039	1874	25	1861	12	1850	19		(Wang et al., 2012)
KM-4-1-14			0.34	0.11253	0.00195	4.52099	0.07672	0.29144	0.00339	1841	32	1735	14	1649	17		(Wang et al., 2012)
KM-4-1-15			0.25	0.11326	0.00153	5.05194	0.07329	0.32351	0.00395	1852	25	1828	12	1807	19		(Wang et al., 2012)
KM-4-1-16			0.44	0.06763	0.00096	1.29269	0.01942	0.13863	0.0017	857	30	842	9	837	10		(Wang et al., 2012)
KM-4-1-17			0.39	0.06783	0.00106	1.33671	0.02224	0.14292	0.00185	863	33	862	10	861	10		(Wang et al., 2012)
KM-4-1-18			0.38	0.11689	0.00192	5.34872	0.0943	0.33189	0.00449	1909	30	1877	15	1848	22		(Wang et al., 2012)
KM-4-1-19			0.41	0.14934	0.00517	7.98557	0.25433	0.38782	0.00523	2338	61	2229	29	2113	24		(Wang et al., 2012)
KM-4-1-20			0.47	0.06745	0.00132	1.31213	0.02668	0.14109	0.00198	852	42	851	12	851	11		(Wang et al., 2012)
KM-4-1-21			0.12	0.1395	0.00169	7.87244	0.10263	0.40928	0.00481	2221	21	2217	12	2212	22		(Wang et al., 2012)
KM-4-1-22			0.41	0.06692	0.00094	1.25753	0.01881	0.13627	0.00167	835	30	827	8	824	9		(Wang et al., 2012)
KM-4-1-23			0.81	0.1013	0.00135	4.03106	0.05666	0.2886	0.00346	1648	25	1640	11	1635	17		(Wang et al., 2012)
KM-4-1-24			0.6	0.11338	0.00142	5.09063	0.06793	0.32564	0.00383	1854	23	1835	11	1817	19		(Wang et al., 2012)
KM-4-1-25			0.29	0.11391	0.0017	5.1235	0.07912	0.32626	0.00398	1863	28	1840	13	1820	19		(Wang et al., 2012)
KM-4-1-27			0.82	0.11441	0.00154	5.15629	0.07397	0.32688	0.00398	1871	25	1845	12	1823	19		(Wang et al., 2012)
KM-4-1-28			0.32	0.09269	0.00253	1.38171	0.03369	0.10811	0.00133	1482	53	881	14	662	8		(Wang et al., 2012)
KM-4-1-29			0.19	0.05883	0.00272	0.49338	0.02184	0.06083	0.00081	561	103	407	15	381	5		(Wang et al., 2012)
KM-4-1-30			0.36	0.12071	0.00391	2.15819	0.06457	0.12967	0.0016	1967	59	1168	21	786	9		(Wang et al., 2012)
KM-4-1-31			0.67	0.17789	0.00283	12.1908	0.20702	0.4971	0.0066	2633	27	2619	16	2601	28		(Wang et al., 2012)
KM-4-1-32			0.71	0.11424	0.00181	5.2799	0.08764	0.33523	0.0043	1868	29	1866	14	1864	21		(Wang et al., 2012)
KM-4-1-33			0.58	0.11466	0.00185	5.3159	0.08981	0.33628	0.00432	1875	30	1871	14	1869	21		(Wang et al., 2012)
KM-4-1-34			0.47	0.11535	0.002	5.39287	0.09547	0.33911	0.00433	1885	32	1884	15	1882	21		(Wang et al., 2012)
KM-4-1-36			0.38	0.06767	0.00126	1.31981	0.02554	0.14147	0.00193	858	40	854	11	853	11		(Wang et al., 2012)
KM-4-1-37			0.39	0.11493	0.00211	5.2059	0.1002	0.32854	0.00457	1879	34	1854	16	1831	22		(Wang et al., 2012)
KM-4-1-38			0.87	0.10253	0.00178	3.95424	0.07191	0.27974	0.00378	1670	33	1625	15	1590	19		(Wang et al., 2012)
KM-4-1-39			0.7	0.07921	0.00155	2.12517	0.0423	0.19461	0.00263	1177	40	1157	14	1146	14		(Wang et al., 2012)
KM-4-1-40			0.59	0.06129	0.00129	0.89543	0.01921	0.10597	0.00147	649	46	649	10	649	9		(Wang et al., 2012)
KM-4-1-43			0.58	0.11829	0.00213	5.74591	0.107	0.35233	0.00466	1931	33	1938	16	1946	22		(Wang et al., 2012)
KM-4-1-44			0.36	0.0669	0.00136	1.27543	0.02641	0.13829	0.00189	835	43	835	12	835	11		(Wang et al., 2012)
KM-4-1-45			0.68	0.16346	0.00213	10.4262	0.15008	0.46259	0.0059	2492	22	2473	13	2451	26		(Wang et al., 2012)
KM-4-1-46			0.43	0.11457	0.00154	5.23034	0.07644	0.33111	0.00416	1873	25	1858	12	1844	20		(Wang et al., 2012)
KM-4-1-47			0.43	0.06435	0.00199	1.05683	0.02966	0.11912	0.00153	753	67	732	15	725	9		(Wang et al., 2012)
KM-4-1-48			0.54	0.11478	0.00142	5.06417	0.06886	0.31997	0.00389	1876	23	1830	12	1790	19		(Wang et al., 2012)
KM-4-1-50			0.42	0.15263	0.00254	9.31985	0.16676	0.44289	0.00615	2376	29	2370	16	2364	27		(Wang et al., 2012)
KM-4-1-52			0.69	0.10817	0.00435	4.00521	0.14819	0.26854	0.00424	1769	75	1635	30	1533	22		(Wang et al., 2012)
KM-4-1-53			1	0.18874	0.00251	13.7261	0.19222	0.5274	0.00631	2731	22	2731	13	2730	27		(Wang et al., 2012)
KM-4-1-55			0.61	0.15592	0.00529	5.07426	0.15826	0.23604	0.00314	2412	59	1832	26	1366	16		(Wang et al., 2012)
KM-4-1-57			0.35	0.06888	0.00117	1.31041	0.02281	0.13799	0.00174	895	36	850	10	833	10		(Wang et al., 2012)
KM-4-1-58			0.78	0.11671	0.00169	5.19715	0.07851	0.32296	0.00396	1906	27	1852	13	1804	19		(Wang et al., 2012)
WN8 (Ediacaran Dengying Formation 32°31′22.85″, 106°52′35.55″)
WN8-1			1.06	0.0677	0.0035	1.267	0.0642	0.138	0.003	859	108	831	29	835	16		(Luo et al., 2019b)
WN8-2			0.98	0.0649	0.0023	0.891	0.0318	0.099	0.001	772	74	647	17	609	8		(Luo et al., 2019b)
WN8-4			0.95	0.1134	0.0044	5.272	0.219	0.336	0.006	1855	70	1864	36	1869	29		(Luo et al., 2019b)
WN8-5			0.76	0.0636	0.0027	1.077	0.0443	0.124	0.002	731	92	742	22	752	9		(Luo et al., 2019b)
WN8-6			0.89	0.0658	0.0026	1.15	0.0468	0.127	0.002	1200	82	777	22	768	10		(Luo et al., 2019b)
WN8-7			0.91	0.1273	0.0036	6.564	0.1844	0.374	0.005	2061	50	2054	25	2047	24		(Luo et al., 2019b)
WN8-8			0.95	0.0654	0.0025	1.067	0.0411	0.118	0.002	787	80	737	20	718	9		(Luo et al., 2019b)
WN8-9			0.65	0.0684	0.0021	1.309	0.0412	0.138	0.002	881	64	849	18	835	9		(Luo et al., 2019b)
WN8-10			0.9	0.0725	0.0024	0.932	0.0275	0.093	0.001	1011	100	669	15	575	7		(Luo et al., 2019b)
WN8-11			0.75	0.0647	0.0025	1.079	0.0425	0.122	0.002	765	86	743	21	742	14		(Luo et al., 2019b)
WN8-12			0.82	0.0664	0.0034	1.032	0.0497	0.115	0.002	820	107	720	25	700	11		(Luo et al., 2019b)
WN8-13			0.7	0.0699	0.003	1.338	0.0542	0.14	0.002	926	89	862	24	847	11		(Luo et al., 2019b)
WN8-14			0.99	0.0665	0.0029	1.131	0.0484	0.123	0.002	820	91	768	23	749	9		(Luo et al., 2019b)
WN8-15			0.64	0.066	0.0027	1.122	0.0422	0.124	0.002	806	83	764	20	754	9		(Luo et al., 2019b)
WN8-16			0.97	0.0686	0.0018	1.324	0.0353	0.139	0.002	887	54	856	15	840	9		(Luo et al., 2019b)
WN8-17			0.57	0.07	0.0021	1.523	0.0498	0.158	0.003	929	62	940	20	946	17		(Luo et al., 2019b)
WN8-18			0.61	0.0641	0.0026	1.091	0.0423	0.124	0.002	743	87	749	21	753	10		(Luo et al., 2019b)
WN8-19			1.07	0.0656	0.0027	1.124	0.0444	0.125	0.002	792	85	765	21	760	11		(Luo et al., 2019b)
WN8-21			0.69	0.0678	0.002	1.4	0.0397	0.149	0.002	865	−139	889	17	898	10		(Luo et al., 2019b)
WN8-24			0.83	0.0641	0.0023	1.119	0.0397	0.127	0.002	746	44	762	19	769	9		(Luo et al., 2019b)
WN8-25			0.63	0.065	0.0017	1.171	0.0323	0.13	0.002	772	56	787	15	790	9		(Luo et al., 2019b)
WN8-26			0.46	0.0653	0.0029	1.019	0.0422	0.116	0.003	783	94	713	21	709	15		(Luo et al., 2019b)
WN8-27			0.66	0.0678	0.0024	1.317	0.0482	0.141	0.002	861	106	853	21	849	9		(Luo et al., 2019b)
WN8-28			0.38	0.0694	0.0015	1.175	0.026	0.122	0.001	911	51	789	12	744	6		(Luo et al., 2019b)
WN8-29			0.76	0.0871	0.002	2.814	0.0659	0.234	0.003	1363	44	1359	18	1354	13		(Luo et al., 2019b)
WN8-30			0.85	0.0684	0.0026	1.196	0.0407	0.127	0.002	880	84	799	19	771	9		(Luo et al., 2019b)
WN8-31			0.84	0.0648	0.0027	1.07	0.0426	0.121	0.002	769	87	739	21	735	9		(Luo et al., 2019b)
WN8-32			0.98	0.0638	0.0022	0.951	0.0313	0.109	0.002	744	72	679	16	666	9		(Luo et al., 2019b)
WN8-33			0.85	0.063	0.0018	1.092	0.0311	0.126	0.001	709	57	749	15	763	8		(Luo et al., 2019b)
WN8-34			0.77	0.067	0.0021	1.352	0.0442	0.146	0.002	839	65	868	19	877	10		(Luo et al., 2019b)
WN8-35			0.98	0.0666	0.0041	1.173	0.0686	0.131	0.002	828	125	788	32	791	13		(Luo et al., 2019b)
WN8-36			0.76	0.0686	0.0017	1.299	0.0311	0.137	0.002	887	52	845	14	828	9		(Luo et al., 2019b)
WN8-37			1.18	0.0709	0.0028	1.448	0.0561	0.149	0.002	955	80	909	23	893	10		(Luo et al., 2019b)
WN8-38			1.07	0.0639	0.0028	1.093	0.0472	0.124	0.002	739	94	750	23	754	11		(Luo et al., 2019b)
WN8-39			0.52	0.0657	0.0014	1.246	0.031	0.137	0.002	794	45	822	14	830	13		(Luo et al., 2019b)
WN8-40			0.72	0.0669	0.0024	1.268	0.0503	0.137	0.002	835	71	832	23	828	12		(Luo et al., 2019b)
WN8-41			0.71	0.0658	0.0015	1.304	0.0302	0.143	0.002	798	53	847	13	862	8		(Luo et al., 2019b)
WN8-42			0.69	0.0733	0.003	1.593	0.0616	0.159	0.002	1021	52	967	24	952	12		(Luo et al., 2019b)
WN8-44			0.98	0.0663	0.0033	1.113	0.0534	0.123	0.002	815	103	760	26	747	10		(Luo et al., 2019b)
WN8-45			1.03	0.0629	0.0022	1.019	0.0375	0.117	0.001	706	73	713	19	711	8		(Luo et al., 2019b)
WN8-46			1.03	0.0718	0.0016	1.015	0.025	0.102	0.001	989	50	712	13	626	7		(Luo et al., 2019b)
WN8-47			0.74	0.0666	0.0028	1.312	0.055	0.142	0.002	833	82	851	24	858	10		(Luo et al., 2019b)
WN8-48			0.65	0.0663	0.0015	1.183	0.0269	0.129	0.001	817	48	793	13	780	7		(Luo et al., 2019b)
WN8-49			0.63	0.0789	0.0025	1.102	0.0324	0.101	0.001	1169	63	754	16	620	6		(Luo et al., 2019b)
WN8-50			0.63	0.0721	0.0034	1.329	0.0571	0.134	0.002	991	91	858	25	810	10		(Luo et al., 2019b)
WN8-51			0.93	0.0659	0.0017	1.198	0.0319	0.131	0.002	1200	53	800	15	794	9		(Luo et al., 2019b)
WN8-52			0.73	0.0684	0.0018	1.419	0.0413	0.149	0.002	880	52	897	17	898	13		(Luo et al., 2019b)
WN8-53			0.85	0.0648	0.0021	1.059	0.0342	0.118	0.002	766	70	733	17	720	9		(Luo et al., 2019b)
WN8-54			0.38	0.0683	0.0022	1.455	0.044	0.154	0.002	880	67	912	18	924	10		(Luo et al., 2019b)
WN8-55			0.66	0.066	0.0027	1.188	0.0481	0.13	0.002	806	92	795	22	789	9		(Luo et al., 2019b)
WN8-56			0.74	0.0694	0.002	1.399	0.0397	0.145	0.002	922	61	889	17	873	8		(Luo et al., 2019b)
WN8-57			0.71	0.0686	0.0018	1.376	0.0366	0.144	0.002	887	56	879	16	870	9		(Luo et al., 2019b)
WN8-58			1.13	0.0673	0.003	1.101	0.047	0.119	0.002	856	94	754	23	722	10		(Luo et al., 2019b)
WN8-60			0.64	0.0625	0.002	0.853	0.027	0.098	0.001	700	67	626	15	602	6		(Luo et al., 2019b)
WN8-61			0.28	0.0708	0.0021	1.42	0.0411	0.145	0.002	950	55	897	17	870	10		(Luo et al., 2019b)
WN8-62			1.07	0.0665	0.0028	1.149	0.0456	0.128	0.004	833	89	777	22	777	20		(Luo et al., 2019b)
WN8-63			0.83	0.0656	0.0026	1.16	0.0453	0.128	0.002	794	83	782	21	777	10		(Luo et al., 2019b)
WN8-64			0.83	0.0637	0.0031	1.055	0.0544	0.12	0.002	731	99	731	27	732	9		(Luo et al., 2019b)
WN8-65			0.93	0.0665	0.003	1.159	0.0475	0.127	0.002	833	97	781	22	773	9		(Luo et al., 2019b)
WN8-66			0.74	0.068	0.0028	1.259	0.0512	0.137	0.002	878	82	827	23	825	12		(Luo et al., 2019b)
WN8-68			1.44	0.0683	0.0038	1.209	0.0576	0.131	0.002	880	112	805	27	790	12		(Luo et al., 2019b)
WN8-69			0.95	0.1575	0.0041	9.002	0.2166	0.413	0.006	2429	44	2338	22	2230	27		(Luo et al., 2019b)
WN8-70			0.73	0.0646	0.0021	1.004	0.0301	0.114	0.002	761	64	706	15	696	9		(Luo et al., 2019b)
WN8-72			1.04	0.0686	0.002	1.379	0.0404	0.145	0.002	887	59	880	17	872	10		(Luo et al., 2019b)
WN8-73			0.59	0.0663	0.0019	1.18	0.0331	0.128	0.002	817	60	791	15	778	9		(Luo et al., 2019b)
WN8-74			0.77	0.0671	0.0034	1.125	0.0535	0.122	0.002	843	106	765	26	741	9		(Luo et al., 2019b)
WN8-75			0.75	0.0682	0.0027	1.247	0.0459	0.134	0.002	876	82	822	21	810	11		(Luo et al., 2019b)
WN8-77			1	0.0658	0.0031	1.196	0.0546	0.132	0.002	798	98	799	25	798	10		(Luo et al., 2019b)
WN8-78			0.77	0.0723	0.0027	1.56	0.058	0.156	0.002	994	108	955	23	934	9		(Luo et al., 2019b)
WN8-79			1.06	0.0655	0.0033	1.109	0.0551	0.123	0.002	791	107	758	27	748	10		(Luo et al., 2019b)
WN8-80			0.49	0.072	0.0023	1.541	0.0485	0.156	0.002	987	64	947	19	932	12		(Luo et al., 2019b)
WN8-81			0.62	0.0743	0.0025	1.703	0.0553	0.166	0.002	1050	67	1010	21	988	10		(Luo et al., 2019b)
WN8-82			0.39	0.1307	0.0039	2.779	0.0781	0.154	0.002	2109	52	1350	21	924	13		(Luo et al., 2019b)
WN8-83			0.87	0.0707	0.0025	1.353	0.0477	0.138	0.003	950	72	869	21	835	14		(Luo et al., 2019b)
WN8-84			0.93	0.0671	0.0022	1.162	0.0366	0.125	0.002	843	68	783	17	758	9		(Luo et al., 2019b)
WN8-85			1.06	0.0659	0.0026	1.194	0.0476	0.13	0.002	803	85	798	22	790	9		(Luo et al., 2019b)
WN8-86			0.76	0.0702	0.004	1.416	0.0832	0.146	0.003	933	123	896	35	878	14		(Luo et al., 2019b)
WN8-87			0.56	0.0682	0.0025	1.321	0.0481	0.141	0.002	876	76	855	21	848	10		(Luo et al., 2019b)
WN8-88			0.75	0.0632	0.0039	0.952	0.0614	0.109	0.003	717	127	679	32	665	14		(Luo et al., 2019b)
WN8-89			0.73	0.0648	0.0036	1.001	0.0586	0.112	0.003	769	112	704	30	683	15		(Luo et al., 2019b)
WN8-90			0.66	0.0625	0.0027	0.826	0.0332	0.096	0.001	700	97	611	18	591	6		(Luo et al., 2019b)
WN8-91			0.78	0.0648	0.0017	1.184	0.0302	0.132	0.002	769	49	793	14	801	8		(Luo et al., 2019b)
WN8-92			1.04	0.0676	0.0045	1.156	0.0672	0.128	0.003	857	133	780	32	778	15		(Luo et al., 2019b)
WN8-93			0.81	0.0696	0.0038	1.355	0.0716	0.143	0.002	917	118	870	31	861	12		(Luo et al., 2019b)
WN8-94			0.7	0.0654	0.003	0.868	0.0351	0.096	0.001	787	96	634	19	592	7		(Luo et al., 2019b)
WN8-95			0.63	0.0631	0.0026	0.903	0.0396	0.106	0.003	722	89	654	21	650	17		(Luo et al., 2019b)
WN8-96			0.84	0.0651	0.0022	1.14	0.0354	0.128	0.002	776	75	773	17	776	10		(Luo et al., 2019b)
WN8-97			1.04	0.0648	0.0027	1.071	0.0444	0.12	0.002	769	89	739	22	730	10		(Luo et al., 2019b)
WN8-98			1	0.0647	0.0022	1.13	0.0361	0.127	0.002	765	68	768	17	773	10		(Luo et al., 2019b)
WN8-99			0.59	0.0685	0.0027	1.362	0.053	0.145	0.002	883	83	873	23	874	12		(Luo et al., 2019b)
WN8-100			0.95	0.0853	0.0034	1.68	0.0727	0.14	0.002	1324	78	1001	28	845	12		(Luo et al., 2019b)
WN11 (Ediacaran Dengying Formation 32°27′56.34″, 106°47′32.85″)
WN11-1			1.16	0.0734	0.0019	1.119	0.0395	0.109	0.002	1028	52	763	19	665	14		(Luo et al., 2019b)
WN11-2			0.57	0.061	0.0019	0.984	0.0324	0.116	0.002	639	67	696	17	707	9		(Luo et al., 2019b)
WN11-3			1.34	0.0615	0.0019	0.904	0.0294	0.106	0.001	657	67	654	16	648	6		(Luo et al., 2019b)
WN11-4			0.88	0.0705	0.003	1.423	0.0629	0.146	0.002	943	87	899	26	876	10		(Luo et al., 2019b)
WN11-5			0.77	0.065	0.0031	1.162	0.0541	0.13	0.002	776	99	783	25	787	9		(Luo et al., 2019b)
WN11-6			1.36	0.065	0.0025	1.226	0.0482	0.136	0.002	776	77	812	22	824	9		(Luo et al., 2019b)
WN11-7			0.72	0.0625	0.0034	0.85	0.045	0.101	0.002	700	117	625	25	619	9		(Luo et al., 2019b)
WN11-8			0.78	0.0632	0.0021	1.106	0.0371	0.127	0.002	717	70	756	18	771	9		(Luo et al., 2019b)
WN11-9			1.14	0.0657	0.0037	1.152	0.0592	0.13	0.002	798	125	778	28	787	13		(Luo et al., 2019b)
WN11-10			0.43	0.0701	0.004	0.924	0.0511	0.096	0.001	931	123	664	27	590	8		(Luo et al., 2019b)
WN11-11			0.57	0.1725	0.0034	11.89	0.2475	0.498	0.006	2583	33	2596	20	2604	25		(Luo et al., 2019b)
WN11-12			0.87	0.0684	0.0019	1.371	0.0376	0.145	0.002	883	53	876	16	874	10		(Luo et al., 2019b)
WN11-13			1.59	0.0635	0.0022	1.105	0.0388	0.126	0.002	724	69	756	19	765	9		(Luo et al., 2019b)
WN11-14			0.74	0.0667	0.0024	1.25	0.0449	0.136	0.001	828	76	824	20	819	8		(Luo et al., 2019b)
WN11-15			1.38	0.0629	0.0017	1.034	0.0283	0.119	0.001	706	55	721	14	722	7		(Luo et al., 2019b)
WN11-16			1.22	0.0663	0.0022	1.125	0.0381	0.122	0.001	815	70	765	18	744	7		(Luo et al., 2019b)
WN11-17			0.82	0.0659	0.0015	1.181	0.0261	0.129	0.001	1200	48	792	12	784	7		(Luo et al., 2019b)
WN11-18			0.75	0.0673	0.0021	1.255	0.0409	0.134	0.002	856	61	826	18	812	9		(Luo et al., 2019b)
WN11-19			0.76	0.0636	0.003	1.079	0.0503	0.123	0.002	728	100	743	25	750	12		(Luo et al., 2019b)
WN11-20			1.52	0.0656	0.0023	1.15	0.0417	0.126	0.002	794	74	777	20	766	11		(Luo et al., 2019b)
WN11-21			0.84	0.0757	0.0037	1.677	0.0753	0.161	0.002	1087	97	1000	29	961	13		(Luo et al., 2019b)
WN11-22			0.68	0.0683	0.002	1.407	0.0402	0.148	0.002	876	92	892	17	892	9		(Luo et al., 2019b)
WN11-23			0.72	0.0657	0.0064	1.173	0.1083	0.13	0.003	794	206	788	51	790	19		(Luo et al., 2019b)
WN11-24			0.62	0.0649	0.0021	1.106	0.0347	0.123	0.001	772	69	756	17	747	7		(Luo et al., 2019b)
WN11-25			0.88	0.0737	0.0024	1.452	0.0509	0.141	0.002	1035	67	911	21	852	10		(Luo et al., 2019b)
WN11-26			0.73	0.0669	0.0039	1.311	0.0673	0.143	0.003	835	115	851	30	860	15		(Luo et al., 2019b)
WN11-27			0.71	0.0628	0.0015	1.041	0.0253	0.119	0.001	702	50	724	13	726	7		(Luo et al., 2019b)
WN11-28			1.24	0.0705	0.0039	1.303	0.0674	0.134	0.002	943	112	847	30	809	14		(Luo et al., 2019b)
WN11-29			0.7	0.0683	0.0029	1.459	0.059	0.156	0.002	880	89	914	24	937	13		(Luo et al., 2019b)
WN11-30			0.4	0.0666	0.0024	1.302	0.046	0.141	0.002	833	76	847	20	852	9		(Luo et al., 2019b)
WN11-31			0.86	0.0614	0.0024	1.052	0.0421	0.124	0.002	654	88	730	21	752	12		(Luo et al., 2019b)
WN11-32			0.84	0.155	0.0036	9.968	0.2392	0.462	0.006	2402	40	2432	22	2447	25		(Luo et al., 2019b)
WN11-33			0.99	0.0645	0.0022	1.071	0.0341	0.12	0.001	767	72	739	17	732	8		(Luo et al., 2019b)
WN11-34			0.42	0.1574	0.003	10.01	0.1845	0.456	0.004	2428	33	2436	17	2420	16		(Luo et al., 2019b)
WN11-35			1.6	0.0639	0.0026	1.089	0.0428	0.123	0.002	739	92	748	21	745	9		(Luo et al., 2019b)
WN11-36			0.97	0.0724	0.0023	1.505	0.0469	0.149	0.002	998	65	933	19	895	9		(Luo et al., 2019b)
WN11-37			1.08	0.0634	0.0026	0.985	0.038	0.112	0.001	720	88	696	19	685	8		(Luo et al., 2019b)
WN11-38			1	0.0666	0.0017	1.214	0.0318	0.131	0.001	833	55	807	15	792	8		(Luo et al., 2019b)
WN11-39			0.6	0.0678	0.0036	1.262	0.0612	0.138	0.002	863	109	829	28	833	13		(Luo et al., 2019b)
WN11-40			0.68	0.125	0.0022	5.668	0.1005	0.326	0.003	2029	31	1926	15	1818	12		(Luo et al., 2019b)
WN11-41			0.78	0.0673	0.0015	1.351	0.0318	0.145	0.002	856	47	868	14	871	9		(Luo et al., 2019b)
WN11-42			1.05	0.0637	0.0026	1.069	0.0434	0.122	0.002	731	86	738	21	741	9		(Luo et al., 2019b)
WN11-43			0.5	0.0692	0.0022	1.394	0.0462	0.146	0.002	906	67	886	20	875	9		(Luo et al., 2019b)
WN11-44			0.83	0.0671	0.002	1.327	0.0406	0.143	0.002	843	63	857	18	862	9		(Luo et al., 2019b)
WN11-45			0.57	0.1518	0.0024	9.199	0.149	0.437	0.004	2369	27	2358	15	2337	16		(Luo et al., 2019b)
WN11-46			0.92	0.0644	0.0032	0.983	0.0437	0.113	0.002	754	99	695	22	692	9		(Luo et al., 2019b)
WN11-47			0.71	0.0681	0.002	1.327	0.0377	0.141	0.002	872	60	857	17	852	9		(Luo et al., 2019b)
WN11-48			0.66	0.0647	0.0021	1.273	0.043	0.142	0.002	765	67	834	19	855	11		(Luo et al., 2019b)
WN11-49			0.67	0.063	0.0026	1.036	0.0399	0.12	0.002	706	89	722	20	731	10		(Luo et al., 2019b)
WN11-50			0.73	0.0637	0.0023	1.078	0.0394	0.123	0.002	731	76	743	19	747	10		(Luo et al., 2019b)
WN11-51			0.61	0.0685	0.0016	1.367	0.0342	0.143	0.002	883	50	875	15	864	9		(Luo et al., 2019b)
WN11-52			0.88	0.0639	0.0019	1.117	0.0314	0.126	0.001	739	62	761	15	767	8		(Luo et al., 2019b)
WN11-53			1.28	0.0677	0.0022	1.131	0.0358	0.12	0.002	861	67	768	17	731	9		(Luo et al., 2019b)
WN11-54			0.61	0.0683	0.0037	1.33	0.0681	0.141	0.002	880	113	859	30	853	11		(Luo et al., 2019b)
WN11-55			0.46	0.1106	0.003	4.977	0.1286	0.325	0.004	1809	50	1815	22	1815	20		(Luo et al., 2019b)
WN11-56			0.88	0.0635	0.002	1.061	0.0319	0.121	0.001	724	69	734	16	736	7		(Luo et al., 2019b)
WN11-57			1.16	0.0637	0.003	1.078	0.0509	0.122	0.002	731	99	742	25	744	10		(Luo et al., 2019b)
WN11-58			0.86	0.0631	0.0023	1.067	0.0385	0.122	0.002	711	78	737	19	744	9		(Luo et al., 2019b)
WN11-59			0.91	0.0615	0.0028	1.029	0.0448	0.122	0.002	657	100	718	22	743	11		(Luo et al., 2019b)
WN11-60			0.99	0.0589	0.0016	0.772	0.0212	0.095	0.001	565	66	581	12	583	6		(Luo et al., 2019b)
WN11-61			0.9	0.0651	0.0023	1.197	0.0426	0.133	0.002	776	73	799	20	804	10		(Luo et al., 2019b)
WN11-62			0.72	0.0634	0.0021	1.078	0.0347	0.123	0.001	724	72	743	17	747	8		(Luo et al., 2019b)
WN11-63			0.83	0.0625	0.0026	1.048	0.0415	0.122	0.002	700	82	728	21	742	9		(Luo et al., 2019b)
WN11-64			0.88	0.1201	0.0025	6.06	0.132	0.363	0.004	1957	37	1985	19	1997	18		(Luo et al., 2019b)
WN11-65			0.65	0.0655	0.0022	1.454	0.0479	0.16	0.002	791	72	911	20	956	9		(Luo et al., 2019b)
WN11-66			0.8	0.0681	0.0021	1.396	0.0428	0.148	0.002	872	97	887	18	890	9		(Luo et al., 2019b)
WN11-67			1.01	0.076	0.0022	1.658	0.0454	0.157	0.002	1095	56	993	17	938	9		(Luo et al., 2019b)
WN11-68			0.91	0.064	0.0067	1.07	0.1071	0.124	0.004	740	222	739	53	751	22		(Luo et al., 2019b)
WN11-69			1.01	0.0653	0.0032	1.194	0.0534	0.133	0.002	783	104	798	25	803	11		(Luo et al., 2019b)
WN11-70			0.98	0.069	0.0037	1.288	0.0676	0.135	0.003	898	111	840	30	815	15		(Luo et al., 2019b)
WN11-71			0.65	0.0692	0.0022	1.466	0.0431	0.154	0.002	903	67	916	18	921	12		(Luo et al., 2019b)
WN11-72			0.67	0.067	0.003	1.194	0.0505	0.129	0.002	839	93	798	23	783	11		(Luo et al., 2019b)
WN11-73			0.91	0.0689	0.0022	1.243	0.0384	0.13	0.002	894	67	820	17	790	9		(Luo et al., 2019b)
WN11-74			1.34	0.1187	0.0033	5.956	0.1614	0.361	0.004	1936	49	1969	24	1985	21		(Luo et al., 2019b)
WN11-75			1.12	0.0663	0.002	1.241	0.035	0.135	0.002	817	63	819	16	817	9		(Luo et al., 2019b)
WN11-76			1.42	0.1508	0.0078	3.652	0.2183	0.169	0.005	2355	89	1561	48	1007	26		(Luo et al., 2019b)
WN11-77			0.73	0.0643	0.0024	1.091	0.0407	0.122	0.002	752	78	749	20	744	9		(Luo et al., 2019b)
WN11-78			0.96	0.0661	0.002	1.198	0.0346	0.132	0.002	809	65	800	16	797	9		(Luo et al., 2019b)
WN11-79			0.99	0.0621	0.0023	1.048	0.038	0.122	0.002	680	78	728	19	741	9		(Luo et al., 2019b)
WN11-80			0.79	0.0735	0.0023	1.597	0.0497	0.157	0.002	1028	62	969	19	940	9		(Luo et al., 2019b)
WN11-81			1	0.0728	0.003	1.504	0.0602	0.15	0.002	1009	89	932	24	901	12		(Luo et al., 2019b)
WN11-82			1.09	0.067	0.0046	1.149	0.0826	0.122	0.003	839	144	777	39	744	14		(Luo et al., 2019b)
WN11-83			0.68	0.0653	0.0015	1.174	0.027	0.13	0.002	783	44	789	13	787	9		(Luo et al., 2019b)
WN11-84			1.26	0.0708	0.0045	1.171	0.068	0.123	0.002	950	131	787	32	745	12		(Luo et al., 2019b)
WN11-85			0.7	0.0657	0.0025	1.111	0.0425	0.123	0.002	798	80	759	21	745	9		(Luo et al., 2019b)
WN11-86			0.87	0.0664	0.0023	1.285	0.0431	0.14	0.002	818	79	839	19	844	10		(Luo et al., 2019b)
WN11-87			0.68	0.0644	0.0054	1.033	0.0746	0.122	0.003	754	177	720	37	742	16		(Luo et al., 2019b)
WN11-88			2.14	0.1259	0.0035	6.22	0.163	0.357	0.004	2043	55	2007	23	1966	19		(Luo et al., 2019b)
WN11-89			0.75	0.0649	0.0028	1.094	0.0465	0.122	0.002	772	91	750	23	745	11		(Luo et al., 2019b)
WN11-90			1.11	0.1212	0.0031	6.098	0.1631	0.363	0.004	1974	46	1990	23	1997	19		(Luo et al., 2019b)
WN11-91			0.83	0.0685	0.0025	1.18	0.0411	0.125	0.002	883	81	791	19	762	10		(Luo et al., 2019b)
WN11-92			1.08	0.0648	0.0024	1.077	0.0392	0.121	0.002	766	78	742	19	738	9		(Luo et al., 2019b)
WN11-93			0.84	0.0673	0.0041	1.167	0.0692	0.128	0.002	856	126	785	32	778	14		(Luo et al., 2019b)
WN11-94			0.77	0.0657	0.0023	1.118	0.0417	0.123	0.002	794	79	762	20	745	9		(Luo et al., 2019b)
19JY-17 (Ediacaran meta-sediments)
19JY-17.01	258	218	0.85	0.068	0.0011	1.3034	0.0218	0.1389	0.0014	870	32	847	14	839	9		(Chen et al., 2020)
19JY-17.02	355	93	0.26	0.0687	0.001	1.2647	0.0212	0.1335	0.0014	890	32	830	14	808	9		(Chen et al., 2020)
19JY-17.03	229	86	0.37	0.0692	0.0015	1.2847	0.0297	0.1346	0.0014	906	44	839	19	814	9		(Chen et al., 2020)
19JY-17.04	195	376	1.92	0.0669	0.0019	1.0638	0.036	0.1153	0.0016	835	59	736	25	703	10		(Chen et al., 2020)
19JY-17.05	97	106	1.09	0.0712	0.0031	1.3568	0.0623	0.1381	0.0016	965	89	871	40	834	10		(Chen et al., 2020)
19JY-17.06	63	48	0.77	0.1458	0.002	8.4836	0.1349	0.4219	0.0044	2298	24	2284	36	2269	24		(Chen et al., 2020)
19JY-17.07	187	88	0.47	0.0667	0.0011	1.2387	0.0234	0.1347	0.0015	829	36	818	15	814	9		(Chen et al., 2020)
19JY-17.08	301	137	0.45	0.0673	0.0011	1.2468	0.0222	0.1344	0.0014	847	34	822	15	813	9		(Chen et al., 2020)
19JY-17.09	122	51	0.42	0.0661	0.0016	1.2227	0.0334	0.1341	0.0015	810	52	811	22	811	9		(Chen et al., 2020)
19JY-17.10	235	269	1.15	0.067	0.0013	1.2039	0.0233	0.1303	0.0014	838	39	802	16	790	9		(Chen et al., 2020)
19JY-17.11	166	39	0.23	0.0645	0.0014	1.1642	0.0279	0.1309	0.0014	758	47	784	19	793	8		(Chen et al., 2020)
19JY-17.12	183	79	0.43	0.0666	0.0015	1.2618	0.0298	0.1373	0.0015	827	48	829	20	830	9		(Chen et al., 2020)
19JY-17.13	85	95	1.12	0.1101	0.0017	4.8814	0.0834	0.3215	0.0035	1801	28	1799	31	1797	20		(Chen et al., 2020)
19JY-17.14	176	72	0.41	0.0645	0.0014	1.0573	0.0251	0.1189	0.0012	757	46	732	17	724	8		(Chen et al., 2020)
19JY-17.15	322	298	0.93	0.0635	0.001	1.0476	0.0183	0.1197	0.0012	724	35	728	13	729	7		(Chen et al., 2020)
19JY-17.16	179	145	0.81	0.0675	0.0018	1.2476	0.0326	0.134	0.0013	854	54	822	21	811	8		(Chen et al., 2020)
19JY-17.17	159	121	0.76	0.216	0.0027	17.0647	0.2412	0.573	0.0057	2951	20	2938	42	2920	29		(Chen et al., 2020)
19JY-17.18	494	582	1.18	0.0886	0.0011	2.8139	0.0407	0.2304	0.0023	1395	24	1359	20	1337	13		(Chen et al., 2020)
19JY-17.19	366	34	0.09	0.0685	0.001	1.2603	0.0222	0.1334	0.0014	884	31	828	15	807	9		(Chen et al., 2020)
19JY-17.20	176	70	0.4	0.0667	0.0014	1.1435	0.0252	0.1243	0.0013	829	45	774	17	755	8		(Chen et al., 2020)
19JY-17.21	258	103	0.4	0.0977	0.0013	3.5816	0.0531	0.266	0.0028	1580	25	1545	23	1520	16		(Chen et al., 2020)
19JY-17.22	209	137	0.65	0.0673	0.0013	1.2008	0.0242	0.1294	0.0013	847	39	801	16	785	8		(Chen et al., 2020)
19JY-17.23	142	72	0.51	0.0717	0.0017	1.3521	0.0339	0.1367	0.0015	979	49	868	22	826	9		(Chen et al., 2020)
19JY-17.24	137	68	0.49	0.0694	0.0016	1.285	0.0305	0.1344	0.0014	910	47	839	20	813	9		(Chen et al., 2020)
19JY-17.25	265	117	0.44	0.0647	0.001	1.1465	0.021	0.1286	0.0014	764	34	776	14	780	8		(Chen et al., 2020)
19JY-17.26	184	173	0.94	0.065	0.0014	1.0926	0.0236	0.122	0.0014	773	45	750	16	742	8		(Chen et al., 2020)
19JY-17.27	282	187	0.66	0.1344	0.0017	7.2008	0.1075	0.3887	0.004	2156	23	2137	32	2117	22		(Chen et al., 2020)
19JY-17.28	124	148	1.19	0.1195	0.0017	5.3611	0.0852	0.3253	0.0034	1949	25	1879	30	1815	19		(Chen et al., 2020)
19JY-17.29	149	122	0.82	0.0695	0.0014	1.2957	0.0269	0.1351	0.0015	915	42	844	17	817	9		(Chen et al., 2020)
19JY-18 (Ediacaran meta-sediments)
19JY-18.01	190	148	0.78	0.129	0.0017	6.7167	0.1038	0.3768	0.0037	2084	24	2075	14	2061	17		(Chen et al., 2020)
19JY-18.02	83	70	0.84	0.0674	0.0018	1.1695	0.033	0.1259	0.0014	850	56	786	15	764	8		(Chen et al., 2020)
19JY-18.03	105	89	0.85	0.0743	0.0024	1.8568	0.0673	0.1808	0.0028	1050	71	1066	24	1072	15		(Chen et al., 2020)
19JY-18.04	262	261	1	0.0699	0.0012	1.4787	0.0263	0.1533	0.0014	928	31	922	11	919	8		(Chen et al., 2020)
19JY-18.05	345	367	1.06	0.0676	0.0012	1.2889	0.0242	0.138	0.0013	857	36	841	11	833	7		(Chen et al., 2020)
19JY-18.06	249	338	1.36	0.0657	0.0019	1.1249	0.0297	0.1245	0.0017	798	56	765	14	756	10		(Chen et al., 2020)
19JY-18.07	246	243	0.99	0.0716	0.002	1.6306	0.051	0.1647	0.0026	973	56	982	20	983	14		(Chen et al., 2020)
19JY-18.08	505	518	1.03	0.0696	0.0011	1.4972	0.0267	0.1558	0.0016	917	33	929	11	934	9		(Chen et al., 2020)
19JY-18.09	164	145	0.89	0.0668	0.0017	1.2287	0.0321	0.1334	0.0018	831	47	814	15	807	10		(Chen et al., 2020)
19JY-18.10	281	153	0.55	0.0712	0.0012	1.6045	0.0282	0.1634	0.0017	965	33	972	11	976	10		(Chen et al., 2020)
19JY-18.11	225	334	1.48	0.0683	0.0012	1.4228	0.0273	0.1511	0.0017	876	42	899	11	907	9		(Chen et al., 2020)
19JY-18.12	195	276	1.41	0.0641	0.0017	1.1366	0.0311	0.1282	0.0014	746	50	771	15	778	8		(Chen et al., 2020)
19JY-18.13	267	171	0.64	0.0701	0.0015	1.4823	0.0334	0.153	0.0014	931	43	923	14	918	8		(Chen et al., 2020)
19JY-18.14	104	84	0.81	0.0684	0.0017	1.3325	0.0333	0.1417	0.0015	880	52	860	14	854	8		(Chen et al., 2020)
19JY-18.15	253	392	1.55	0.0692	0.0019	1.3851	0.0374	0.1452	0.0019	903	56	883	16	874	11		(Chen et al., 2020)
19JY-18.16	141	143	1.01	0.0652	0.0016	1.0817	0.0273	0.1202	0.0015	781	50	744	13	732	9		(Chen et al., 2020)
19JY-18.17	146	191	1.31	0.064	0.002	1.0385	0.0325	0.1178	0.0021	740	66	723	16	718	12		(Chen et al., 2020)
19JY-18.18	74	66	0.89	0.0657	0.002	1.1699	0.0357	0.1292	0.0016	798	58	787	17	783	9		(Chen et al., 2020)
19JY-18.19	62	58	0.93	0.0672	0.0025	1.2977	0.0518	0.1403	0.0027	843	77	845	23	846	15		(Chen et al., 2020)
19JY-18.20	337	515	1.53	0.0651	0.0011	1.1544	0.0207	0.1282	0.0011	776	36	779	10	778	7		(Chen et al., 2020)
19JY-18.21	142	127	0.89	0.0692	0.0016	1.352	0.0318	0.1413	0.0014	906	46	868	14	852	8		(Chen et al., 2020)
19JY-18.22	68	60	0.88	0.0672	0.002	1.2708	0.0375	0.1375	0.0017	844	58	833	17	831	9		(Chen et al., 2020)
19JY-18.23	90	72	0.79	0.066	0.0019	1.1444	0.0327	0.1267	0.0017	806	61	775	15	769	10		(Chen et al., 2020)
19JY-18.24	84	84	1	0.0653	0.0022	1.154	0.0395	0.1283	0.0023	783	64	779	19	778	13		(Chen et al., 2020)
19JY-18.25	82	80	0.97	0.0663	0.0023	1.1633	0.0396	0.1279	0.0016	817	70	784	19	776	9		(Chen et al., 2020)
19JY-18.26	105	112	1.07	0.0651	0.0018	1.1327	0.033	0.126	0.0014	776	59	769	16	765	8		(Chen et al., 2020)
19JY-18.27	160	203	1.27	0.069	0.0015	1.267	0.0308	0.1324	0.0015	898	45	831	14	802	8		(Chen et al., 2020)
19JY-18.28	152	105	0.69	0.0713	0.0019	1.6014	0.0441	0.1622	0.002	965	53	971	17	969	11		(Chen et al., 2020)
19JY-18.29	164	156	0.95	0.0696	0.0013	1.4967	0.0315	0.1556	0.0017	917	45	929	13	932	10		(Chen et al., 2020)
19JY-18.30	74	48	0.65	0.0649	0.0018	1.1204	0.0306	0.126	0.0015	772	54	763	15	765	9		(Chen et al., 2020)
19JY-18.31	88	42	0.47	0.0704	0.002	1.4399	0.0418	0.1482	0.0017	943	57	906	17	891	9		(Chen et al., 2020)
19JY-18.32	227	236	1.04	0.0643	0.0013	1.0519	0.0215	0.119	0.0013	754	43	730	11	725	8		(Chen et al., 2020)
19JY-18.33	102	111	1.09	0.0626	0.0016	1.0376	0.0267	0.1208	0.0014	694	56	723	13	735	8		(Chen et al., 2020)
19JY-18.34	182	111	0.61	0.0669	0.0016	1.3164	0.0342	0.1425	0.0018	835	50	853	15	859	10		(Chen et al., 2020)
19JY-18.35	105	84	0.8	0.0654	0.0017	1.1541	0.0297	0.1284	0.0016	789	49	779	14	779	9		(Chen et al., 2020)
19JY-18.36	155	159	1.02	0.0646	0.0016	1.1399	0.0274	0.1284	0.0014	761	50	772	13	779	8		(Chen et al., 2020)
19JY-18.37	133	180	1.35	0.0648	0.002	1.0957	0.0317	0.123	0.0019	769	64	751	15	748	11		(Chen et al., 2020)
19JY-18.38	154	91	0.59	0.0644	0.0018	1.1344	0.0302	0.1281	0.0014	754	58	770	14	777	8		(Chen et al., 2020)
19JY-18.39	116	126	1.08	0.0647	0.0018	1.1423	0.0326	0.1283	0.0017	765	60	774	15	778	10		(Chen et al., 2020)
19JY-18.40	414	274	0.66	0.0687	0.0012	1.4456	0.0273	0.1526	0.0018	900	38	908	11	915	10		(Chen et al., 2020)
19JY-18.41	185	150	0.81	0.0694	0.0016	1.461	0.0359	0.1528	0.0024	909	53	914	15	916	13		(Chen et al., 2020)
19JY-18.42	133	109	0.82	0.0696	0.0017	1.3854	0.0354	0.1442	0.0017	917	50	883	15	868	9		(Chen et al., 2020)
19JY-18.43	146	176	1.2	0.0638	0.0023	1.0435	0.0431	0.1182	0.0022	744	76	726	21	720	13		(Chen et al., 2020)
19JY-18.44	195	177	0.91	0.0681	0.0016	1.3813	0.0382	0.146	0.0019	872	44	881	16	879	11		(Chen et al., 2020)
19JY-18.45	450	274	0.61	0.064	0.0015	1.0986	0.0276	0.1243	0.0021	743	45	753	13	755	12		(Chen et al., 2020)
19JY-18.46	31	32	1.01	0.11	0.0025	4.8346	0.1139	0.3199	0.0043	1811	42	1791	20	1789	21		(Chen et al., 2020)
19JY-18.47	173	125	0.72	0.067	0.0014	1.2974	0.0259	0.1407	0.0015	839	42	845	11	848	9		(Chen et al., 2020)
19JY-18.48	259	241	0.93	0.0648	0.0013	1.1323	0.0252	0.1268	0.0016	769	44	769	12	769	9		(Chen et al., 2020)
19JY-18.49	510	695	1.36	0.0699	0.0011	1.4764	0.026	0.153	0.0017	924	33	921	11	918	9		(Chen et al., 2020)
19JY-18.50	61	111	1.83	0.0694	0.0025	1.3586	0.0492	0.1421	0.0022	922	74	871	21	856	13		(Chen et al., 2020)
	Ub	Pbb	Thb	206Pbe	2 σ	207Pbe	2 σ	207Pbe	2 σ	206Pb	2 σ	207Pb	2 σ	207Pb	2 σ
Number	(ppm)	(ppm)	U	238U	%	235U	%	206Pb	%	238U	(Ma)	235U	(Ma)	206Pb	(Ma)
CH-2-a1	30	6	1.05	0.1698	1.6	1.7	3.7	0.0726	3.4	1011	15	1008	24	1003	69		(Hofmann et al., 2011)
CH-2-a2	93	13	1.32	0.1196	2.3	1.09	4	0.066	3.3	728	16	747	22	805	69		(Hofmann et al., 2011)
CH-2-a3	16	3	0.68	0.1566	1.7	1.53	6	0.071	5.8	938	15	944	38	958	118		(Hofmann et al., 2011)
CH-2-a4	22	4	0.92	0.1579	2	1.55	4.6	0.071	4.1	945	17	949	29	958	84		(Hofmann et al., 2011)
CH-2-a5	42	7	0.99	0.1422	2.3	1.33	4.5	0.0679	3.8	857	18	859	26	864	80		(Hofmann et al., 2011)
CH-2-a6	82	12	0.73	0.134	1.9	1.22	3.2	0.0659	2.6	811	14	809	18	803	55		(Hofmann et al., 2011)
CH-2-a7	86	13	1.49	0.1235	2.2	1.1	3.4	0.0646	2.5	751	16	753	18	760	53		(Hofmann et al., 2011)
CH-2-a8	27	4	0.85	0.1244	2.8	1.09	4.5	0.0637	3.6	756	20	750	24	731	76		(Hofmann et al., 2011)
CH-2-a9	28	4	1.15	0.1405	1.7	1.29	4.6	0.0665	4.3	848	14	841	27	824	89		(Hofmann et al., 2011)
CH-2-a10	27	4	1.43	0.1184	2.8	1.03	5.2	0.0633	4.4	722	19	721	27	719	92		(Hofmann et al., 2011)
CH-2-a11	32	6	1.49	0.1479	2.1	1.43	5.5	0.0703	5.1	889	17	903	33	936	104		(Hofmann et al., 2011)
CH-2-a12	18	3	1.63	0.1204	1.9	1.05	6.5	0.0631	6.2	733	13	728	35	713	133		(Hofmann et al., 2011)
CH-2-a13	12	2	2.06	0.1367	1.5	1.25	7.1	0.0665	6.9	826	12	825	41	823	145		(Hofmann et al., 2011)
CH-2-a14	38	6	0.58	0.155	1.8	1.49	3.3	0.0696	2.7	929	16	926	20	918	56		(Hofmann et al., 2011)
CH-2-a16	49	8	0.84	0.141	2.1	1.31	4.4	0.0674	3.9	850	16	850	26	850	81		(Hofmann et al., 2011)
CH-2-a19	77	12	1.38	0.1298	1.2	1.17	2.8	0.0651	2.5	787	9	785	16	779	53		(Hofmann et al., 2011)
CH-2-a20	20	4	2.24	0.1505	1.8	1.45	5.5	0.0696	5.2	904	16	908	34	918	107		(Hofmann et al., 2011)
CH-2-a21	5	1	1.93	0.1309	3.7	1.19	9.9	0.0657	9.2	793	28	794	56	798	193		(Hofmann et al., 2011)
CH-2-a22	37	6	1.43	0.1433	2.3	1.33	4.3	0.0672	3.6	863	19	858	25	845	74		(Hofmann et al., 2011)
CH-2-a23	57	9	0.94	0.1362	2.5	1.25	4.6	0.0668	3.8	823	20	825	26	832	80		(Hofmann et al., 2011)
CH-2-a24	17	3	0.82	0.14	3.2	1.3	6.5	0.0673	5.7	844	25	845	38	847	118		(Hofmann et al., 2011)
CH-2-a25	132	23	0.71	0.1591	1.9	1.54	2.8	0.07	2.1	952	17	945	17	930	43		(Hofmann et al., 2011)
CH-2-a26	19	3	0.68	0.1783	2.6	1.79	4.6	0.073	3.8	1058	25	1043	31	1013	78		(Hofmann et al., 2011)
CH-2-a27	138	23	1.54	0.1373	2	1.26	2.9	0.0666	2.1	829	16	828	16	825	43		(Hofmann et al., 2011)
CH-2-a28	38	7	2.06	0.1355	2	1.24	4.5	0.0665	4	819	16	820	26	822	84		(Hofmann et al., 2011)
CH-2-a29	56	9	1.12	0.1344	1.6	1.22	4	0.066	3.7	813	13	812	23	807	77		(Hofmann et al., 2011)
CH-2-a30	6	1	0.99	0.1347	2.4	1.23	7.7	0.0663	7.3	815	19	815	44	815	152		(Hofmann et al., 2011)
CH-2-a31GJ	48	7	0.74	0.1307	2.5	1.19	4.5	0.0658	3.7	792	19	794	25	800	77		(Hofmann et al., 2011)
CH-2-a32	49	8	1.13	0.1378	2	1.26	4	0.0665	3.5	832	16	829	23	821	73		(Hofmann et al., 2011)
CH-2-a33	49	10	2.35	0.137	3.6	1.27	5.9	0.0672	4.7	828	28	832	34	844	98		(Hofmann et al., 2011)
CH-2-a34	44	8	1.45	0.1447	1.9	1.35	4.6	0.0679	4.2	871	16	870	27	865	87		(Hofmann et al., 2011)
CH-2-a36	99	16	1.35	0.1322	1.9	1.2	3.1	0.0659	2.5	800	14	801	17	803	52		(Hofmann et al., 2011)
CH-2-a37	64	11	1.25	0.1512	1.6	1.45	3.8	0.0694	3.5	908	14	908	23	910	72		(Hofmann et al., 2011)
CH-2-a38	44	9	3.19	0.1416	2.1	1.32	5.5	0.0676	5.1	854	17	855	33	856	106		(Hofmann et al., 2011)
CH-2-a39	76	12	1.39	0.1379	1.7	1.26	3.3	0.0665	2.8	833	14	829	19	821	59		(Hofmann et al., 2011)
CH-2-a40	18	4	2.11	0.1474	2.4	1.42	5.7	0.0698	5.1	887	20	897	34	923	105		(Hofmann et al., 2011)
CH-2-a41GJ	33	5	1.52	0.1297	1.9	1.16	4.6	0.065	4.2	786	14	784	25	776	88		(Hofmann et al., 2011)
CH-2-a42	52	9	1.7	0.1348	1.9	1.23	3.4	0.0661	2.9	815	15	814	19	811	60		(Hofmann et al., 2011)
CH-2-a43	110	17	1.82	0.1165	2.7	1.01	5.2	0.0628	4.5	710	18	708	27	701	95		(Hofmann et al., 2011)
CH-2-a44	79	17	3.06	0.1412	2.1	1.32	3.3	0.0677	2.5	851	17	854	19	860	52		(Hofmann et al., 2011)
CH-2-a45	66	11	1.07	0.1488	2.6	1.39	3.9	0.0679	2.9	894	22	886	24	867	61		(Hofmann et al., 2011)
CH-2-a46	38	7	2.18	0.1426	2.1	1.36	4.3	0.069	3.7	859	17	871	25	900	77		(Hofmann et al., 2011)
CH-2-a47	30	5	1.07	0.137	2.4	1.26	4.5	0.0665	3.8	828	19	826	26	822	80		(Hofmann et al., 2011)
CH-2-a48	35	6	1.38	0.1476	1.9	1.37	3.8	0.0675	3.3	887	15	878	22	853	68		(Hofmann et al., 2011)
CH-2-a49	35	8	3.18	0.1412	2	1.32	3.4	0.0676	2.8	852	16	853	20	855	58		(Hofmann et al., 2011)
CH-2-a50	57	24	1.02	0.3597	2.9	5.91	3.9	0.1191	2.6	1981	49	1962	34	1943	47		(Hofmann et al., 2011)
CH-2-a51	37	7	2.91	0.1518	2.1	1.45	4.7	0.0694	4.2	911	18	911	29	912	87		(Hofmann et al., 2011)
CH-2-a53	28	4	0.81	0.1338	2.1	1.21	4.4	0.0657	3.8	810	16	806	25	798	81		(Hofmann et al., 2011)
CH-2-a56	12	2	0.89	0.1596	1.7	1.56	4.6	0.0707	4.3	955	15	953	29	949	89		(Hofmann et al., 2011)
CH-2-a57	14	2	0.86	0.1551	2.2	1.5	3.9	0.07	3.2	930	19	930	24	929	67		(Hofmann et al., 2011)
CH-2-a58	13	2	0.83	0.169	2.9	1.71	6.7	0.0732	6	1007	27	1011	44	1020	122		(Hofmann et al., 2011)
CH-2-a59	21	3	0.97	0.1409	2.7	1.31	4.9	0.0673	4.1	850	21	849	29	847	85		(Hofmann et al., 2011)
CH-2-2a1	25	4	0.99	0.1599	1.3	1.56	4	0.0707	3.7	956	12	954	25	948	77		(Hofmann et al., 2011)
CH-2-2a2	36	6	1.75	0.1421	1.4	1.34	3.7	0.0686	3.4	857	11	865	22	887	71		(Hofmann et al., 2011)
CH-2-2a3	65	11	1.39	0.1424	1.8	1.32	3.5	0.0673	2.9	858	15	855	20	846	61		(Hofmann et al., 2011)
CH-2-2a4	22	4	1.49	0.1343	2	1.22	5	0.0661	4.6	812	15	811	28	809	96		(Hofmann et al., 2011)
CH-2-2a6	137	19	0.61	0.1304	1.6	1.2	3.3	0.067	2.9	790	12	803	18	838	60		(Hofmann et al., 2011)
CH-2-2a7	48	22	1.63	0.3626	1.8	6.15	2.8	0.123	2.2	1994	31	1997	25	2000	39		(Hofmann et al., 2011)
CH-2-2a8	32	5	0.89	0.1359	2.6	1.24	5.4	0.0663	4.8	822	20	820	31	816	99		(Hofmann et al., 2011)
CH-2-2a9	20	3	1.33	0.1294	2.2	1.16	5.1	0.0652	4.6	785	16	783	28	780	96		(Hofmann et al., 2011)
CH-2-2a11	111	17	1.47	0.1304	2.1	1.19	3.4	0.0662	2.7	790	15	796	19	812	57		(Hofmann et al., 2011)
CH-2-2a13	23	4	1.92	0.1197	3	1.07	5.8	0.0648	4.9	729	21	738	31	766	104		(Hofmann et al., 2011)
CH-2-2a15	300	49	1.41	0.1398	2.8	1.35	7.8	0.07	7.3	843	22	867	47	929	149		(Hofmann et al., 2011)
CH-2-2a16	317	49	1.45	0.1308	2.2	1.19	3.4	0.0662	2.6	793	16	798	19	813	54		(Hofmann et al., 2011)
CH-2-2a17	47	7	1.13	0.1398	1.8	1.29	3.4	0.0669	2.9	843	15	841	20	836	60		(Hofmann et al., 2011)
CH-2-2a20	17	3	0.78	0.1612	2.4	1.57	6.7	0.0709	6.2	963	22	960	42	953	127		(Hofmann et al., 2011)
CH-2-2a23	21	3	1.33	0.1301	3	1.17	6.1	0.0653	5.3	788	22	787	34	785	110		(Hofmann et al., 2011)
CH-2-2a24	18	3	0.55	0.142	2	1.32	6	0.0673	5.7	856	16	854	35	848	119		(Hofmann et al., 2011)
CH-2-2a25	14	2	0.96	0.1382	2.5	1.28	6.4	0.0671	5.9	834	20	836	37	842	123		(Hofmann et al., 2011)
CH-2-2a26	15	3	1.99	0.1357	1.9	1.26	5	0.0675	4.6	820	14	830	29	854	97		(Hofmann et al., 2011)
CH-2-2a27	21	4	1.8	0.1315	2.3	1.2	5.9	0.0662	5.5	796	17	801	33	813	115		(Hofmann et al., 2011)
CH-2-2a29	45	7	1.38	0.1401	2.1	1.29	4.6	0.0669	4.1	845	17	842	27	835	86		(Hofmann et al., 2011)
CH-2-2a30	66	10	1.37	0.126	2.4	1.14	4.1	0.0656	3.3	765	17	772	22	793	70		(Hofmann et al., 2011)
CH-2-2a31	17	3	2.3	0.1227	2.6	1.08	6.4	0.064	5.9	746	18	745	35	743	125		(Hofmann et al., 2011)
CH-2-2a32	144	25	1.62	0.1402	2.1	1.3	3.7	0.067	3.1	846	16	844	21	839	64		(Hofmann et al., 2011)
CH-2-2a33	80	17	2.97	0.1453	1.1	1.37	3.7	0.0684	3.5	874	9	876	22	881	73		(Hofmann et al., 2011)
CH-2-2a34	33	5	1.2	0.1386	2.1	1.27	3.9	0.0664	3.3	837	17	832	23	819	69		(Hofmann et al., 2011)
CH-2-2a35	32	5	2.76	0.1339	2	1.22	4.3	0.066	3.8	810	16	809	24	806	80		(Hofmann et al., 2011)
CH-2-2a36	98	53	1.84	0.4643	2.3	10.24	2.6	0.1599	1.2	2458	48	2457	25	2455	21		(Hofmann et al., 2011)
CH-2-2a37	37	7	1.13	0.1601	1.6	1.57	4.2	0.0712	3.9	957	14	959	27	963	80		(Hofmann et al., 2011)
CH-2-2a38	41	8	1.15	0.1654	1.9	1.62	4.4	0.0711	3.9	987	18	978	28	960	81		(Hofmann et al., 2011)
CH-2-2a39	43	7	0.63	0.155	2.8	1.49	4	0.0699	2.8	929	25	928	25	924	57		(Hofmann et al., 2011)
CH-2-2a40	211	33	1.41	0.1373	1.3	1.3	2.6	0.0687	2.3	830	10	846	15	889	47		(Hofmann et al., 2011)
CH-2-2a41	62	13	3.21	0.1359	1.7	1.25	2.9	0.0666	2.4	821	13	822	17	825	49		(Hofmann et al., 2011)
CH-2-2a42	42	7	1.91	0.1431	1.5	1.33	4.1	0.0675	3.8	862	12	860	24	854	79		(Hofmann et al., 2011)
CH-2-2a43	56	8	2.36	0.1192	1.6	1.05	5.8	0.0638	5.5	726	11	728	30	734	117		(Hofmann et al., 2011)
CH-2-2a44	87	14	2.06	0.1254	2.2	1.12	3.1	0.0646	2.3	762	16	762	17	762	48		(Hofmann et al., 2011)
CH-2-2a45	9	1	2.23	0.1193	1.3	1.04	6.4	0.0634	6.2	727	9	725	34	721	133		(Hofmann et al., 2011)
CH-2-2a46	73	12	1.13	0.1403	1.7	1.31	2.9	0.0677	2.3	847	13	850	17	859	49		(Hofmann et al., 2011)
CH-2-2a47	58	10	1.68	0.1413	1.2	1.31	2.3	0.0673	2	852	9	851	14	848	42		(Hofmann et al., 2011)
CH-2-2a48	19	3	1.12	0.141	1.4	1.32	5.9	0.0678	5.8	850	11	853	35	861	119		(Hofmann et al., 2011)
CH-2-2a49	33	6	1.35	0.1421	1.7	1.32	3.9	0.0675	3.5	856	13	855	23	853	73		(Hofmann et al., 2011)
CH-2-2a50	104	18	1.74	0.1361	1.4	1.25	2.3	0.0665	1.8	823	11	823	13	824	38		(Hofmann et al., 2011)
CH-2-2a51	13	2	1.44	0.1448	2.1	1.38	5.1	0.0692	4.6	872	17	881	30	905	94		(Hofmann et al., 2011)
CH-2-2a52	63	11	1.48	0.1378	2.5	1.26	3.7	0.0666	2.7	832	19	830	21	825	56		(Hofmann et al., 2011)
CH-2-2a53	49	7	0.94	0.1342	1.4	1.22	3.4	0.066	3.1	812	11	811	19	808	65		(Hofmann et al., 2011)
CH-2-2a54	12	2	1.32	0.1606	1.7	1.63	4.1	0.0734	3.8	960	16	980	26	1025	76		(Hofmann et al., 2011)
CH-2-2a55	11	2	1.17	0.159	1.7	1.55	6.1	0.0706	5.8	951	15	949	38	945	120		(Hofmann et al., 2011)
CH-2-2a56	15	2	0.9	0.1496	1.8	1.43	4.1	0.0691	3.7	899	15	900	25	902	76		(Hofmann et al., 2011)
CH-2-2a57	13	2	1.17	0.1557	2.1	1.51	4.3	0.0702	3.7	933	19	933	27	933	77		(Hofmann et al., 2011)
CH-2-2a59	20	3	1.32	0.1444	2.1	1.35	6.8	0.0678	6.4	870	17	868	40	862	134		(Hofmann et al., 2011)
CH-3-a1	18	4	2.96	0.1422	2.8	1.31	6.3	0.067	5.6	857	23	851	37	837	117		(Hofmann et al., 2011)
CH-3-a3	68	11	1.24	0.1356	2.7	1.24	3.4	0.0663	2.2	820	21	819	20	817	45		(Hofmann et al., 2011)
CH-3-a4	46	9	2.38	0.1385	2.9	1.26	5.3	0.0662	4.5	836	23	830	31	813	93		(Hofmann et al., 2011)
CH-3-a5	86	14	1.48	0.1367	2.8	1.24	3.7	0.0657	2.4	826	22	818	21	797	50		(Hofmann et al., 2011)
CH-3-a6	72	11	0.95	0.1428	2.8	1.34	3.6	0.0678	2.4	861	22	861	21	863	49		(Hofmann et al., 2011)
CH-3-a7	86	13	0.91	0.1354	3.4	1.24	4.7	0.0666	3.3	818	26	821	27	826	69		(Hofmann et al., 2011)
CH-3-a9	54	7	0.97	0.1045	5.1	0.9	6.3	0.0625	3.6	641	31	652	31	690	78		(Hofmann et al., 2011)
CH-3-a10	150	23	0.91	0.1388	2.8	1.28	3.5	0.0669	2	838	22	837	20	835	41		(Hofmann et al., 2011)
CH-3-a11	65	10	0.9	0.133	2.9	1.2	4.8	0.0656	3.8	805	22	802	27	793	79		(Hofmann et al., 2011)
CH-3-a12	122	21	1.4	0.1429	2.7	1.32	3.4	0.0671	2.1	861	22	855	20	840	44		(Hofmann et al., 2011)
CH-3-a13	55	9	1.33	0.1403	2.9	1.29	3.6	0.0669	2.2	846	23	843	21	835	47		(Hofmann et al., 2011)
CH-3-a15	87	14	1.37	0.1352	2.5	1.23	4	0.066	3.2	817	19	814	23	805	66		(Hofmann et al., 2011)
CH-3-a16	264	39	1.17	0.1276	2.5	1.14	3.2	0.0647	2	774	18	772	18	766	43		(Hofmann et al., 2011)
CH-3-a17	29	6	2.82	0.1315	3.5	1.19	5.7	0.0657	4.5	796	26	796	32	795	93		(Hofmann et al., 2011)
CH-3-a18	85	13	1.37	0.1287	2.8	1.16	4	0.0654	2.8	781	21	782	22	786	60		(Hofmann et al., 2011)
CH-3-a20	36	16	1.51	0.3667	2.9	6.3	3.8	0.1246	2.6	2014	50	2018	34	2023	45		(Hofmann et al., 2011)
CH-3-a22	181	26	0.58	0.1374	3	1.26	3.8	0.0664	2.3	830	24	827	22	820	48		(Hofmann et al., 2011)
CH-3-a23	94	18	0.97	0.1681	3	1.69	6	0.0729	5.2	1002	28	1005	39	1012	106		(Hofmann et al., 2011)
CH-3-a26	43	5	0.96	0.1051	2.9	0.88	5	0.061	4.2	644	18	643	24	639	90		(Hofmann et al., 2011)
CH-3-a27	111	15	0.73	0.1239	2.6	1.1	4	0.0645	3	753	19	754	21	758	63		(Hofmann et al., 2011)
CH-3-a28	8	2	2.41	0.1454	4.5	1.37	8.3	0.0681	7	875	37	875	50	873	144		(Hofmann et al., 2011)
CH-3-a29	115	18	1.22	0.1313	2.6	1.19	3.7	0.0655	2.7	795	20	794	21	790	56		(Hofmann et al., 2011)
CH-3-a30	172	23	0.81	0.1251	3	1.11	3.6	0.0644	2	760	22	759	20	755	42		(Hofmann et al., 2011)
CH-3-a32	56	8	1.13	0.1314	3	1.19	4.9	0.0656	3.9	796	23	795	27	793	81		(Hofmann et al., 2011)
CH-3-a33	43	8	2	0.1338	2.7	1.22	4.9	0.0662	4.1	809	20	810	28	814	86		(Hofmann et al., 2011)
CH-3-a34	85	12	1.16	0.1268	3.1	1.13	5.2	0.0647	4.1	769	22	769	28	766	87		(Hofmann et al., 2011)
CH-3-a35	61	9	1.42	0.1236	2.8	1.1	4.6	0.0646	3.7	751	20	754	25	763	77		(Hofmann et al., 2011)
CH-3-a36	25	5	1.56	0.1451	3.1	1.36	6.1	0.068	5.2	873	25	872	36	868	108		(Hofmann et al., 2011)
CH-3-a37	120	21	2.13	0.1369	3.1	1.24	4.3	0.0656	3	827	24	818	25	792	64		(Hofmann et al., 2011)
CH-3-a38	69	11	0.91	0.1421	2.5	1.31	4	0.0671	3	857	20	852	23	840	63		(Hofmann et al., 2011)
CH-3-a39	33	5	0.94	0.1251	4.5	1.12	7.1	0.0647	5.5	760	33	761	39	765	116		(Hofmann et al., 2011)
CH-3-a40	26	4	1.53	0.1388	3.4	1.28	5.6	0.0668	4.5	838	26	836	32	833	93		(Hofmann et al., 2011)
CH-3-a42	61	9	1.14	0.1361	2.8	1.25	4.4	0.0666	3.4	823	21	823	25	824	71		(Hofmann et al., 2011)
CH-3-a43	186	29	1.2	0.1374	2.5	1.26	3	0.0667	1.6	830	20	829	17	828	33		(Hofmann et al., 2011)
CH-3-a44	134	20	0.63	0.142	2.6	1.31	3.1	0.0667	1.7	856	21	848	18	829	35		(Hofmann et al., 2011)
CH-3-a45	54	8	0.9	0.1362	2.7	1.25	3.9	0.0664	2.8	823	21	822	22	819	58		(Hofmann et al., 2011)
CH-3-a46	21	3	1.82	0.1264	3.4	1.13	5.8	0.0651	4.7	767	25	770	32	776	98		(Hofmann et al., 2011)
CH-3-a48	104	15	1.01	0.1263	2.9	1.13	3.6	0.0646	2.2	766	21	765	20	762	45		(Hofmann et al., 2011)
CH-3-a49	18	3	0.95	0.144	2.6	1.32	4.1	0.0667	3.1	867	21	857	24	829	66		(Hofmann et al., 2011)
CH-3-a50	16	2	0.98	0.1359	3.3	1.25	6.1	0.0668	5.1	822	26	824	35	830	107		(Hofmann et al., 2011)
CH-3-a51	36	5	0.7	0.1263	2.7	1.13	5.5	0.0647	4.8	767	19	767	30	766	101		(Hofmann et al., 2011)
CH-3-a52	47	7	1.23	0.1228	2.9	1.09	4	0.0643	2.7	747	21	748	21	751	57		(Hofmann et al., 2011)
CH-3-a53	52	7	0.94	0.124	2.8	1.1	3.9	0.0645	2.7	754	20	755	21	758	56		(Hofmann et al., 2011)
CH-3-a54	115	38	0.26	0.3299	3	5.17	3.4	0.1137	1.5	1838	48	1848	29	1859	28		(Hofmann et al., 2011)
CH-3-a55	24	4	1.59	0.1281	3	1.14	4.7	0.0648	3.6	777	22	775	26	767	76		(Hofmann et al., 2011)
CH-3-a56	20	3	1.25	0.1309	3.3	1.19	4.3	0.0657	2.8	793	25	794	24	798	58		(Hofmann et al., 2011)
CH-3-a57	39	7	0.52	0.1743	2.7	1.78	3.9	0.074	2.8	1036	26	1037	26	1041	57		(Hofmann et al., 2011)
CH-3-a59	25	4	1.14	0.1316	2.8	1.19	3.7	0.0657	2.5	797	21	797	21	797	52		(Hofmann et al., 2011)
CH-3-a60	30	5	1.37	0.1349	2.6	1.24	3.7	0.0665	2.6	816	20	817	21	821	55		(Hofmann et al., 2011)
CH-3-2a1	169	26	1.14	0.1321	1.3	1.2	2.8	0.0657	2.5	800	10	799	16	796	52		(Hofmann et al., 2011)
CH-3-2a2	139	25	2.72	0.1252	1.3	1.12	2.7	0.0646	2.3	760	10	761	15	761	49		(Hofmann et al., 2011)
CH-3-2a3	46	7	1.86	0.1238	1.9	1.1	5.1	0.0642	4.8	752	14	751	28	749	101		(Hofmann et al., 2011)
CH-3-2a5	61	9	1.35	0.133	1.1	1.21	5.4	0.0657	5.3	805	9	803	31	798	111		(Hofmann et al., 2011)
CH-3-2a6	57	8	1.13	0.1276	1.8	1.15	3.7	0.0653	3.2	774	13	776	20	783	68		(Hofmann et al., 2011)
CH-3-2a7	100	16	1.44	0.1342	1.7	1.23	3.2	0.0663	2.7	812	13	813	18	817	56		(Hofmann et al., 2011)
CH-3-2a8	224	36	1.65	0.1314	1.4	1.19	2.2	0.0659	1.7	796	10	798	12	803	36		(Hofmann et al., 2011)
CH-3-2a9	81	12	1.46	0.1226	1	1.08	3.2	0.0641	3	746	7	746	17	746	64		(Hofmann et al., 2011)
CH-3-2a10	41	7	1.54	0.1347	2	1.23	4.5	0.0662	4	815	15	814	25	813	84		(Hofmann et al., 2011)
CH-3-2a11	77	12	1	0.1373	1.8	1.26	5.5	0.0664	5.2	829	14	826	32	818	109		(Hofmann et al., 2011)
CH-3-2a12	44	7	1.88	0.1214	1.2	1.07	3.1	0.064	2.9	739	8	740	16	742	61		(Hofmann et al., 2011)
CH-3-2a13	16	3	1.74	0.1396	1.7	1.3	6.2	0.0676	5.9	842	13	846	36	857	123		(Hofmann et al., 2011)
CH-3-2a14	125	22	1.56	0.1533	2.1	1.46	3.2	0.069	2.4	920	18	914	20	900	50		(Hofmann et al., 2011)
CH-3-2a15	131	23	0.62	0.1715	1.3	1.73	2.5	0.0733	2.1	1021	13	1021	16	1022	42		(Hofmann et al., 2011)
CH-3-2a16	54	6	0.92	0.1049	1.5	0.89	4.3	0.0613	4.1	643	9	645	21	649	88		(Hofmann et al., 2011)
CH-3-2a18	168	25	1.78	0.1235	1	1.1	5.6	0.0647	5.5	751	7	754	30	764	116		(Hofmann et al., 2011)
CH-3-2a19	56	8	1.13	0.1337	2	1.21	4.4	0.0657	4	809	15	806	25	796	83		(Hofmann et al., 2011)
CH-3-2a20	76	11	1.23	0.124	2	1.1	3.5	0.0645	2.9	754	14	755	19	759	60		(Hofmann et al., 2011)
CH-3-2a21	127	20	1.17	0.1344	1.9	1.23	3.7	0.0663	3.1	813	15	814	21	817	65		(Hofmann et al., 2011)
CH-3-2a22	99	18	2.24	0.1369	1.8	1.26	3.1	0.0667	2.5	827	14	827	17	827	52		(Hofmann et al., 2011)
CH-3-2a23	74	12	1.4	0.1311	2.2	1.19	3.9	0.0656	3.2	794	16	795	22	795	68		(Hofmann et al., 2011)
CH-3-2a24	126	21	0.29	0.1707	1.1	1.72	2.2	0.0731	1.9	1016	11	1017	14	1018	39		(Hofmann et al., 2011)
CH-3-2a25	109	20	2.1	0.1396	1.5	1.28	2.9	0.0668	2.5	842	12	839	17	830	53		(Hofmann et al., 2011)
CH-3-2a27	116	16	1.05	0.1227	2.5	1.09	3.6	0.0642	2.5	746	18	746	19	747	54		(Hofmann et al., 2011)
CH-3-2a28	19	4	3.07	0.132	1.9	1.19	6.8	0.0656	6.6	799	14	798	39	794	138		(Hofmann et al., 2011)
CH-3-2a29	55	9	1.83	0.1232	2.3	1.09	4	0.0642	3.2	749	16	749	21	750	68		(Hofmann et al., 2011)
CH-3-2a30	136	23	1.64	0.1361	1.3	1.24	2.5	0.0662	2.1	823	10	820	14	814	43		(Hofmann et al., 2011)
CH-3-2a31	33	5	1.24	0.1237	2.7	1.1	4.6	0.0647	3.7	752	19	755	25	766	79		(Hofmann et al., 2011)
CH-3-2a32	60	11	2.65	0.1293	1.9	1.17	4.9	0.0656	4.6	784	14	786	27	793	96		(Hofmann et al., 2011)
CH-3-2a33	98	17	1.18	0.1467	2.2	1.38	3.7	0.0684	3	883	18	882	22	880	61		(Hofmann et al., 2011)
CH-3-2a34	32	5	1.37	0.1293	1.7	1.17	6.4	0.0656	6.2	784	12	787	36	794	129		(Hofmann et al., 2011)
CH-3-2a35	115	18	1.72	0.1268	1.5	1.16	2.8	0.0666	2.4	770	11	784	16	825	50		(Hofmann et al., 2011)
CH-3-2a36	157	23	1.26	0.128	1.4	1.15	3	0.0652	2.7	776	10	778	16	782	56		(Hofmann et al., 2011)
CH-3-2a37	86	11	1.75	0.1048	2.4	0.89	8	0.0614	7.6	643	15	645	39	653	163		(Hofmann et al., 2011)
CH-3-2a38	109	16	1.09	0.1326	1.8	1.21	2.9	0.0662	2.2	803	14	805	16	812	47		(Hofmann et al., 2011)
CH-3-2a39	41	8	1.06	0.1725	1.7	1.74	3.5	0.0733	3.1	1026	17	1025	23	1022	63		(Hofmann et al., 2011)
CH-3-2a40	79	12	1.05	0.1321	1.6	1.2	3	0.0659	2.6	800	12	801	17	803	54		(Hofmann et al., 2011)
CH-3-2a41	81	13	1.3	0.1375	1.4	1.27	2.9	0.0669	2.5	830	11	831	16	834	53		(Hofmann et al., 2011)
CH-3-2a42	85	16	2.11	0.1455	1	1.36	3.2	0.0678	3	876	8	872	19	863	63		(Hofmann et al., 2011)
CH-3-2a43	70	14	0.53	0.1932	1.9	2.07	4.3	0.0776	3.8	1139	20	1138	30	1137	76		(Hofmann et al., 2011)
CH-3-2a44	63	14	4.62	0.1206	2.6	1.08	4.3	0.0649	3.4	734	18	744	23	772	73		(Hofmann et al., 2011)
CH-3-2a45	45	7	1.01	0.1308	1.6	1.19	3.6	0.0657	3.3	793	12	794	20	797	68		(Hofmann et al., 2011)
CH-3-2a46	37	6	1.19	0.1338	1.7	1.22	4	0.0663	3.7	810	13	811	23	815	77		(Hofmann et al., 2011)
CH-3-2a47	61	8	1.11	0.1218	1.2	1.07	3.9	0.0639	3.7	741	9	740	21	737	78		(Hofmann et al., 2011)
CH-3-2a48	81	15	2.05	0.1429	1.2	1.34	3.2	0.0679	2.9	861	10	862	19	866	61		(Hofmann et al., 2011)
CH-3-2a49	44	7	2.19	0.1209	1.4	1.07	3.8	0.0639	3.5	736	10	737	20	739	75		(Hofmann et al., 2011)
CH-3-2a50	13	2	1.81	0.1297	2.6	1.17	5.2	0.0654	4.5	786	20	786	29	786	95		(Hofmann et al., 2011)
CH-3-2a51	252	36	0.99	0.1274	2.3	1.17	3	0.0665	1.9	773	17	786	17	822	40		(Hofmann et al., 2011)
CH-3-2a52	204	33	0.94	0.1503	1.5	1.44	2.3	0.0696	1.8	902	13	907	14	917	37		(Hofmann et al., 2011)
CH-3-2a53	24	4	2.2	0.1353	1.5	1.23	3.6	0.0659	3.3	818	12	814	20	803	69		(Hofmann et al., 2011)
CH-3-2a54	49	8	1.62	0.1337	1.3	1.22	2.9	0.0661	2.6	809	10	809	16	811	54		(Hofmann et al., 2011)
CH-3-2a55	48	8	1.59	0.1353	1.8	1.24	3.3	0.0664	2.8	818	14	818	19	818	57		(Hofmann et al., 2011)
CH-3-2a56	55	9	1.38	0.1385	1.5	1.28	3.4	0.0669	3	836	12	836	19	835	63		(Hofmann et al., 2011)
CH-3-2a57	88	15	1.58	0.1382	1.6	1.28	2.4	0.0669	1.8	834	13	835	14	836	38		(Hofmann et al., 2011)
CH-3-2a58	28	4	0.88	0.1422	1.5	1.33	3.9	0.0677	3.6	857	12	857	23	859	75		(Hofmann et al., 2011)
CH-3-2a59	54	8	1.24	0.125	1.5	1.11	2.3	0.0644	1.8	759	10	758	12	755	38		(Hofmann et al., 2011)

## Sheet: W Yangtze early Cam
U-Pb ages of detrital zircons from early Cambrian siliciclastic rocks from the western margin of the Yangtze Block
				Ratio						Age
Sample	Th (ppm)	U (ppm)	Th/U	207Pb/206Pb	1σ	207Pb/235U	1σ	206Pb/238U	1σ	207Pb/206Pb	1σ	207Pb/235U	1σ	206Pb/238U	1σ		References
19JY-5 (Cambrian strata)
19JY-5.01	235	167	0.71	0.0577	0.0008	0.688	0.011	0.0864	0.0009	520	31	532	8	534	6		(Chen et al., 2021)
19JY-5.02	79	45	0.57	0.0592	0.0013	0.7013	0.0166	0.086	0.0009	573	50	540	13	532	6		(Chen et al., 2021)
19JY-5.03	115	37	0.32	0.0595	0.0008	0.7105	0.0112	0.0867	0.0009	584	30	545	9	536	6		(Chen et al., 2021)
19JY-5.04	87	36	0.41	0.0589	0.001	0.727	0.0132	0.0895	0.001	563	37	555	10	553	6		(Chen et al., 2021)
19JY-5.05	114	82	0.72	0.059	0.0013	0.723	0.0169	0.0889	0.001	567	48	552	13	549	6		(Chen et al., 2021)
19JY-5.06	153	98	0.64	0.0577	0.0021	0.6575	0.0285	0.0827	0.0011	518	79	513	22	512	7		(Chen et al., 2021)
19JY-5.07	101	65	0.65	0.0574	0.0013	0.6841	0.0161	0.0864	0.0009	507	49	529	12	534	6		(Chen et al., 2021)
19JY-5.08	118	48	0.41	0.0585	0.0009	0.6813	0.0117	0.0844	0.0009	550	33	528	9	522	6		(Chen et al., 2021)
19JY-5.09	436	169	0.39	0.0575	0.0007	0.6591	0.0092	0.0832	0.0009	509	26	514	7	515	6		(Chen et al., 2021)
19JY-5.10	91	30	0.33	0.059	0.0009	0.7184	0.0123	0.0883	0.001	567	33	550	9	545	6		(Chen et al., 2021)
19JY-5.11	186	64	0.35	0.0584	0.0008	0.7112	0.011	0.0884	0.001	543	28	545	8	546	6		(Chen et al., 2021)
19JY-5.12	69	45	0.65	0.0646	0.004	1.0443	0.0634	0.1172	0.0013	762	131	726	44	715	8		(Chen et al., 2021)
19JY-5.13	634	423	0.67	0.0571	0.0007	0.6344	0.0096	0.0805	0.0009	497	28	499	8	499	5		(Chen et al., 2021)
19JY-5.14	319	151	0.47	0.0573	0.0007	0.6802	0.01	0.0862	0.0009	501	28	527	8	533	6		(Chen et al., 2021)
19JY-5.15	234	147	0.63	0.0589	0.0008	0.7051	0.0117	0.0868	0.0009	565	30	542	9	536	6		(Chen et al., 2021)
19JY-5.16	219	193	0.88	0.0804	0.001	2.2349	0.033	0.2015	0.0022	1208	24	1192	18	1183	13		(Chen et al., 2021)
19JY-5.17	95	23	0.24	0.0744	0.0009	1.8455	0.0271	0.1798	0.002	1053	24	1062	16	1066	12		(Chen et al., 2021)
19JY-5.18	228	126	0.55	0.0576	0.0008	0.684	0.0105	0.0862	0.0009	513	29	529	8	533	6		(Chen et al., 2021)
19JY-5.19	245	152	0.62	0.0593	0.0008	0.6678	0.0105	0.0817	0.0009	577	31	519	8	506	5		(Chen et al., 2021)
19JY-5.20	73	35	0.48	0.062	0.0013	0.9226	0.0209	0.1079	0.0012	675	44	664	15	661	7		(Chen et al., 2021)
19JY-5.21	282	116	0.41	0.0582	0.0008	0.6986	0.0107	0.087	0.001	538	28	538	8	538	6		(Chen et al., 2021)
19JY-5.22	103	29	0.29	0.0595	0.0009	0.7108	0.0137	0.0866	0.001	587	34	545	10	535	6		(Chen et al., 2021)
19JY-5.23	214	126	0.59	0.0587	0.0008	0.6843	0.0108	0.0846	0.0009	554	31	529	8	524	6		(Chen et al., 2021)
19JY-5.24	246	66	0.27	0.0588	0.0007	0.6735	0.0098	0.0831	0.0009	559	27	523	8	515	6		(Chen et al., 2021)
19JY-5.25	684	608	0.89	0.0585	0.0007	0.6782	0.0104	0.084	0.001	550	27	526	8	520	6		(Chen et al., 2021)
19JY-5.26	80	29	0.36	0.0596	0.0011	0.702	0.0143	0.0854	0.0009	590	40	540	11	528	6		(Chen et al., 2021)
19JY-5.27	209	131	0.62	0.0732	0.0009	1.7026	0.0256	0.1687	0.0019	1019	26	1009	15	1005	11		(Chen et al., 2021)
19JY-5.28	249	88	0.35	0.0593	0.0008	0.7014	0.0102	0.0858	0.0009	577	28	540	8	531	6		(Chen et al., 2021)
19JY-5.29	220	92	0.42	0.0601	0.0008	0.6961	0.0106	0.084	0.0009	607	29	536	8	520	5		(Chen et al., 2021)
19JY-5.30	264	161	0.61	0.0601	0.0009	0.6966	0.0114	0.084	0.0009	608	31	537	9	520	5		(Chen et al., 2021)
19JY-5.31	255	147	0.58	0.0604	0.0008	0.7207	0.0113	0.0866	0.0009	618	30	551	9	535	6		(Chen et al., 2021)
19JY-5.32	113	40	0.35	0.0606	0.001	0.7316	0.0135	0.0876	0.0009	624	35	558	10	541	6		(Chen et al., 2021)
19JY-5.33	227	102	0.45	0.0585	0.0008	0.699	0.0107	0.0866	0.0009	549	29	538	8	536	6		(Chen et al., 2021)
19JY-5.34	385	265	0.69	0.0613	0.0008	0.714	0.0112	0.0845	0.0009	650	29	547	9	523	5		(Chen et al., 2021)
19JY-5.35	204	120	0.59	0.0571	0.0008	0.6596	0.0103	0.0838	0.0008	496	32	514	8	519	5		(Chen et al., 2021)
19JY-5.36	104	48	0.46	0.0594	0.001	0.6948	0.0122	0.0848	0.0009	583	35	536	9	525	5		(Chen et al., 2021)
19JY-5.37	147	63	0.43	0.0565	0.0008	0.6579	0.0106	0.0845	0.0009	472	32	513	8	523	5		(Chen et al., 2021)
19JY-5.38	439	434	0.99	0.0739	0.0009	1.7654	0.0245	0.1734	0.0018	1038	24	1033	14	1031	11		(Chen et al., 2021)
19JY-5.39	100	25	0.25	0.0598	0.0008	0.6887	0.0108	0.0835	0.0008	598	31	532	8	517	5		(Chen et al., 2021)
19JY-5.40	140	92	0.66	0.0584	0.0011	0.6633	0.013	0.0824	0.0008	545	41	517	10	510	5		(Chen et al., 2021)
19JY-5.41	224	137	0.61	0.0586	0.001	0.6873	0.0126	0.085	0.0009	554	38	531	10	526	5		(Chen et al., 2021)
19JY-5.42	125	40	0.32	0.0578	0.0008	0.6809	0.01	0.0855	0.0009	521	29	527	8	529	5		(Chen et al., 2021)
19JY-5.43	217	108	0.5	0.0595	0.0008	0.6801	0.01	0.083	0.0008	584	29	527	8	514	5		(Chen et al., 2021)
19JY-5.44	420	244	0.58	0.0569	0.0007	0.6373	0.0091	0.0813	0.0008	487	28	501	7	504	5		(Chen et al., 2021)
19JY-5.45	295	116	0.39	0.0578	0.0007	0.663	0.0092	0.0832	0.0008	522	27	516	7	515	5		(Chen et al., 2021)
19JY-5.46	315	139	0.44	0.1722	0.002	9.435	0.126	0.3973	0.0039	2579	20	2381	32	2157	21		(Chen et al., 2021)
19JY-5.47	150	51	0.34	0.0596	0.0008	0.7025	0.0105	0.0855	0.0009	590	29	540	8	529	5		(Chen et al., 2021)
19JY-5.48	254	145	0.57	0.059	0.0008	0.6836	0.0105	0.084	0.0008	568	30	529	8	520	5		(Chen et al., 2021)
19JY-5.49	70	25	0.36	0.0626	0.001	0.9096	0.0154	0.1054	0.001	694	33	657	11	646	6		(Chen et al., 2021)
19JY-5.50	274	80	0.29	0.0586	0.0007	0.6659	0.0091	0.0825	0.0008	551	26	518	7	511	5		(Chen et al., 2021)
19JY-5.51	51	30	0.6	0.0588	0.0021	0.7191	0.0269	0.0887	0.001	560	77	550	21	548	6		(Chen et al., 2021)
19JY-5.52	77	46	0.6	0.0692	0.0013	1.2429	0.0247	0.1303	0.0013	904	39	820	16	790	8		(Chen et al., 2021)
19JY-5.53	119	109	0.92	0.1545	0.0019	9.6064	0.1296	0.4509	0.0044	2396	20	2398	32	2399	23		(Chen et al., 2021)
19JY-5.54	314	133	0.42	0.0596	0.0007	0.6916	0.0095	0.0842	0.0008	589	26	534	7	521	5		(Chen et al., 2021)
19JY-5.55	234	71	0.31	0.0587	0.0007	0.6886	0.0094	0.085	0.0008	557	26	532	7	526	5		(Chen et al., 2021)
19JY-5.56	220	80	0.36	0.0571	0.0007	0.6578	0.0093	0.0835	0.0008	496	28	513	7	517	5		(Chen et al., 2021)
19JY-5.57	328	163	0.5	0.1618	0.0018	10.3013	0.1342	0.4617	0.0045	2475	19	2462	32	2447	24		(Chen et al., 2021)
19JY-5.58	400	246	0.61	0.0589	0.0007	0.6713	0.0093	0.0826	0.0008	565	27	521	7	512	5		(Chen et al., 2021)
19JY-5.59	133	37	0.28	0.0594	0.0008	0.6998	0.0102	0.0854	0.0008	582	28	539	8	529	5		(Chen et al., 2021)
19JY-5.60	403	175	0.43	0.1801	0.0021	11.4351	0.1608	0.4604	0.0049	2654	19	2559	36	2441	26		(Chen et al., 2021)
19JY-5.61	191	78	0.41	0.058	0.0008	0.6628	0.0095	0.0829	0.0008	531	28	516	7	513	5		(Chen et al., 2021)
19JY-5.62	164	64	0.39	0.058	0.0008	0.7297	0.011	0.0913	0.001	529	29	556	8	563	6		(Chen et al., 2021)
19JY-5.63	118	53	0.45	0.0577	0.0009	0.7178	0.012	0.0902	0.001	519	33	549	9	557	6		(Chen et al., 2021)
19JY-5.64	550	496	0.9	0.0582	0.0008	0.681	0.0098	0.0849	0.0009	536	29	527	8	525	5		(Chen et al., 2021)
19JY-5.65	120	80	0.66	0.0589	0.0011	0.7657	0.015	0.0943	0.001	563	40	577	11	581	6		(Chen et al., 2021)
19JY-5.66	344	367	1.07	0.098	0.0012	3.7557	0.0518	0.278	0.0029	1586	22	1583	22	1581	17		(Chen et al., 2021)
19JY-5.67	285	100	0.35	0.0577	0.0007	0.6959	0.01	0.0875	0.0009	518	27	536	8	541	6		(Chen et al., 2021)
19JY-5.68	225	116	0.52	0.0613	0.0009	0.7112	0.0114	0.0842	0.0009	649	31	545	9	521	5		(Chen et al., 2021)
19JY-5.69	310	244	0.79	0.0606	0.0009	0.6987	0.0121	0.0837	0.0009	624	33	538	9	518	5		(Chen et al., 2021)
19JY-5.70	150	66	0.44	0.0559	0.0008	0.6896	0.0107	0.0895	0.001	448	31	533	8	552	6		(Chen et al., 2021)
19JY-5.71	215	133	0.62	0.0566	0.0008	0.705	0.0112	0.0903	0.0009	476	31	542	9	557	6		(Chen et al., 2021)
19JY-5.72	92	74	0.8	0.16	0.0019	10.217	0.1437	0.4631	0.0051	2456	20	2455	35	2453	27		(Chen et al., 2021)
19JY-5.73	222	105	0.47	0.0576	0.0008	0.705	0.0106	0.0888	0.0009	514	29	542	8	548	6		(Chen et al., 2021)
19JY-5.74	415	206	0.5	0.0578	0.0007	0.7368	0.0113	0.0925	0.0011	521	27	561	9	570	7		(Chen et al., 2021)
19JY-5.75	214	85	0.4	0.0587	0.0008	0.6594	0.0097	0.0815	0.0008	556	28	514	8	505	5		(Chen et al., 2021)
19JY-5.76	160	55	0.34	0.056	0.0008	0.6829	0.0109	0.0884	0.0009	453	32	529	8	546	6		(Chen et al., 2021)
19JY-5.77	123	49	0.4	0.1285	0.0015	6.1133	0.0833	0.345	0.0035	2078	20	1992	27	1911	20		(Chen et al., 2021)
19JY-5.78	125	72	0.58	0.0597	0.0012	0.722	0.0143	0.0877	0.0009	594	43	552	11	542	6		(Chen et al., 2021)
19JY-5.79	301	267	0.89	0.0737	0.001	1.7528	0.0337	0.1725	0.0025	1033	28	1028	20	1026	15		(Chen et al., 2021)
19JY-5.80	128	55	0.43	0.0597	0.0009	0.7391	0.013	0.0898	0.001	592	33	562	10	555	6		(Chen et al., 2021)
19JY-5.81	230	181	0.79	0.0608	0.0011	0.7156	0.0137	0.0854	0.0009	631	39	548	10	528	5		(Chen et al., 2021)
19JY-5.82	318	286	0.9	0.0649	0.0008	1.1807	0.0168	0.132	0.0014	771	26	792	11	799	8		(Chen et al., 2021)
19JY-5.83	450	389	0.87	0.0569	0.0007	0.6826	0.0099	0.087	0.0009	488	28	528	8	538	6		(Chen et al., 2021)
19JY-5.84	132	42	0.31	0.0607	0.0009	0.6937	0.0116	0.0829	0.0009	628	32	535	9	513	5		(Chen et al., 2021)
19JY-5.85	186	60	0.32	0.0596	0.0007	0.6928	0.0098	0.0843	0.0008	589	27	534	8	522	5		(Chen et al., 2021)
19JY-5.86	95	65	0.69	0.1058	0.0013	4.5049	0.0615	0.3087	0.003	1729	22	1732	24	1734	17		(Chen et al., 2021)
19JY-5.87	186	64	0.34	0.0581	0.0007	0.6692	0.0096	0.0836	0.0008	533	28	520	7	517	5		(Chen et al., 2021)
19JY-5.88	448	461	1.03	0.072	0.0009	1.6297	0.0221	0.1643	0.0016	985	24	982	13	980	10		(Chen et al., 2021)
19JY-5.89	115	57	0.49	0.0585	0.0009	0.67	0.0117	0.083	0.0008	550	35	521	9	514	5		(Chen et al., 2021)
19JY-6 (Cambrian strata)
19JY-6.01	50	29	0.58	0.0589	0.0027	0.6851	0.0313	0.0844	0.001	563	98	530	24	522	6		(Chen et al., 2021)
19JY-6.02	387	358	0.93	0.0669	0.0008	1.2698	0.0176	0.1377	0.0014	833	25	832	12	832	8		(Chen et al., 2021)
19JY-6.03	144	118	0.82	0.0595	0.0011	0.6841	0.0137	0.0833	0.0008	587	41	529	11	516	5		(Chen et al., 2021)
19JY-6.04	280	142	0.51	0.059	0.0007	0.6867	0.0096	0.0845	0.0008	566	27	531	7	523	5		(Chen et al., 2021)
19JY-6.05	266	148	0.56	0.059	0.0008	0.6875	0.0098	0.0845	0.0008	568	28	531	8	523	5		(Chen et al., 2021)
19JY-6.06	177	61	0.35	0.0595	0.0008	0.6766	0.0107	0.0825	0.0008	584	30	525	8	511	5		(Chen et al., 2021)
19JY-6.07	134	102	0.76	0.059	0.0012	0.6626	0.014	0.0814	0.0008	568	43	516	11	504	5		(Chen et al., 2021)
19JY-6.08	257	210	0.82	0.0593	0.0009	0.679	0.0108	0.083	0.0008	578	31	526	8	514	5		(Chen et al., 2021)
19JY-6.09	90	34	0.38	0.0584	0.0014	0.6857	0.018	0.0852	0.0009	544	53	530	14	527	6		(Chen et al., 2021)
19JY-6.10	283	92	0.33	0.0581	0.0007	0.667	0.0091	0.0833	0.0008	532	26	519	7	516	5		(Chen et al., 2021)
19JY-6.11	296	126	0.42	0.0702	0.0008	1.4968	0.0205	0.1546	0.0016	935	24	929	13	927	9		(Chen et al., 2021)
19JY-6.12	171	63	0.37	0.0573	0.0008	0.6595	0.0097	0.0834	0.0008	504	29	514	8	517	5		(Chen et al., 2021)
19JY-6.13	106	95	0.89	0.0619	0.0013	0.8878	0.0201	0.104	0.0011	671	46	645	15	638	7		(Chen et al., 2021)
19JY-6.14	399	307	0.77	0.0662	0.0008	1.1876	0.0179	0.1301	0.0015	813	26	795	12	788	9		(Chen et al., 2021)
19JY-6.15	107	69	0.64	0.0576	0.0014	0.6602	0.017	0.0832	0.0008	514	55	515	13	515	5		(Chen et al., 2021)
19JY-6.16	164	108	0.66	0.0575	0.0009	0.667	0.0114	0.0841	0.0009	511	35	519	9	521	5		(Chen et al., 2021)
19JY-6.17	504	338	0.67	0.0583	0.0007	0.6637	0.0099	0.0826	0.0009	541	28	517	8	511	5		(Chen et al., 2021)
19JY-6.18	198	132	0.66	0.0576	0.0009	0.6605	0.0108	0.0832	0.0008	513	33	515	8	515	5		(Chen et al., 2021)
19JY-6.19	135	89	0.66	0.0578	0.001	0.6736	0.0129	0.0846	0.0009	521	38	523	10	523	6		(Chen et al., 2021)
19JY-6.20	746	600	0.8	0.0582	0.0007	0.6618	0.0092	0.0825	0.0008	537	26	516	7	511	5		(Chen et al., 2021)
19JY-6.21	117	152	1.29	0.0581	0.0021	0.673	0.0253	0.084	0.0009	533	79	523	20	520	6		(Chen et al., 2021)
19JY-6.22	79	47	0.59	0.0586	0.0014	0.6712	0.0164	0.0831	0.0008	551	51	521	13	515	5		(Chen et al., 2021)
19JY-6.23	187	102	0.55	0.0563	0.0008	0.6566	0.0101	0.0846	0.0009	463	31	513	8	524	5		(Chen et al., 2021)
19JY-6.24	529	298	0.56	0.0634	0.0008	0.899	0.0123	0.1028	0.001	722	25	651	9	631	6		(Chen et al., 2021)
19JY-6.25	539	406	0.75	0.0576	0.0007	0.654	0.009	0.0823	0.0008	515	27	511	7	510	5		(Chen et al., 2021)
19JY-6.26	74	40	0.54	0.0585	0.0014	0.6581	0.0162	0.0816	0.0008	548	51	513	13	506	5		(Chen et al., 2021)
19JY-6.27	159	82	0.52	0.058	0.0008	0.6648	0.0106	0.0831	0.0008	531	32	518	8	515	5		(Chen et al., 2021)
19JY-6.28	989	1202	1.22	0.0587	0.0007	0.7585	0.0102	0.0937	0.0009	556	26	573	8	577	6		(Chen et al., 2021)
19JY-6.29	235	240	1.02	0.0586	0.0011	0.6513	0.0131	0.0806	0.0008	552	42	509	10	500	5		(Chen et al., 2021)
19JY-6.30	328	213	0.65	0.0591	0.0008	0.6841	0.0105	0.0839	0.0009	571	28	529	8	520	5		(Chen et al., 2021)
19JY-6.31	190	75	0.39	0.0595	0.0008	0.6834	0.01	0.0833	0.0008	586	28	529	8	516	5		(Chen et al., 2021)
19JY-6.32	135	103	0.77	0.0605	0.0012	0.7017	0.0151	0.0841	0.0009	622	42	540	12	521	5		(Chen et al., 2021)
19JY-6.33	208	110	0.53	0.1647	0.0019	10.6729	0.1407	0.4699	0.0046	2505	19	2495	33	2483	24		(Chen et al., 2021)
19JY-6.34	354	264	0.75	0.0619	0.0008	0.865	0.012	0.1013	0.001	671	27	633	9	622	6		(Chen et al., 2021)
19JY-6.35	104	18	0.17	0.0574	0.0007	0.6529	0.0091	0.0826	0.0008	505	27	510	7	511	5		(Chen et al., 2021)
19JY-6.36	293	145	0.5	0.0595	0.0007	0.6597	0.0092	0.0804	0.0008	586	27	514	7	498	5		(Chen et al., 2021)
19JY-6.37	178	131	0.74	0.0614	0.0011	0.8112	0.0157	0.0959	0.001	653	38	603	12	590	6		(Chen et al., 2021)
19JY-6.38	95	83	0.87	0.0731	0.0011	1.7332	0.0301	0.172	0.0019	1017	32	1021	18	1023	11		(Chen et al., 2021)
19JY-6.39	278	167	0.6	0.0581	0.0008	0.667	0.0099	0.0833	0.0009	533	29	519	8	516	5		(Chen et al., 2021)
19JY-6.40	247	270	1.1	0.06	0.0011	0.6882	0.0134	0.0831	0.0008	605	40	532	10	515	5		(Chen et al., 2021)
19JY-6.41	260	105	0.4	0.0584	0.0007	0.6886	0.0099	0.0855	0.0009	544	27	532	8	529	6		(Chen et al., 2021)
19JY-6.42	264	234	0.89	0.0599	0.0009	0.6874	0.0116	0.0832	0.0008	601	33	531	9	515	5		(Chen et al., 2021)
19JY-6.43	255	104	0.41	0.0573	0.0008	0.6481	0.0097	0.0821	0.0008	502	29	507	8	508	5		(Chen et al., 2021)
19JY-6.44	240	124	0.51	0.0585	0.0008	0.6737	0.0105	0.0836	0.0009	547	30	523	8	517	6		(Chen et al., 2021)
19JY-6.45	121	88	0.73	0.059	0.0013	0.6611	0.0152	0.0813	0.0008	566	48	515	12	504	5		(Chen et al., 2021)
19JY-6.46	212	92	0.43	0.0567	0.0007	0.6608	0.0095	0.0845	0.0008	481	28	515	7	523	5		(Chen et al., 2021)
19JY-6.47	124	86	0.69	0.0607	0.0012	0.6821	0.0152	0.0815	0.0008	628	44	528	12	505	5		(Chen et al., 2021)
19JY-6.48	395	213	0.54	0.0576	0.0007	0.6336	0.009	0.0798	0.0008	516	27	498	7	495	5		(Chen et al., 2021)
19JY-6.49	282	276	0.98	0.0565	0.0009	0.6303	0.0109	0.0809	0.0008	473	35	496	9	501	5		(Chen et al., 2021)
19JY-6.50	542	568	1.05	0.0606	0.0008	0.7662	0.0113	0.0917	0.001	626	27	578	8	565	6		(Chen et al., 2021)
19JY-6.51	371	224	0.6	0.0587	0.0009	0.6485	0.0112	0.0801	0.001	556	33	508	9	497	6		(Chen et al., 2021)
19JY-6.52	149	77	0.52	0.0566	0.0009	0.6579	0.0114	0.0843	0.0009	477	35	513	9	521	5		(Chen et al., 2021)
19JY-6.53	90	56	0.63	0.0582	0.0013	0.6576	0.0153	0.0819	0.0008	539	49	513	12	507	5		(Chen et al., 2021)
19JY-6.54	97	36	0.37	0.0593	0.0012	0.6732	0.0146	0.0823	0.0009	580	45	523	11	510	5		(Chen et al., 2021)
19JY-6.55	145	165	1.13	0.0659	0.0018	1.1505	0.0394	0.1267	0.0015	802	57	777	27	769	9		(Chen et al., 2021)
19JY-6.56	212	123	0.58	0.0598	0.0008	0.6659	0.0104	0.0807	0.0008	598	30	518	8	500	5		(Chen et al., 2021)
19JY-6.57	98	57	0.58	0.0595	0.0011	0.6734	0.0136	0.0821	0.0008	584	41	523	11	509	5		(Chen et al., 2021)
19JY-6.58	101	61	0.61	0.0603	0.0012	0.6908	0.014	0.0831	0.0008	614	42	533	11	515	5		(Chen et al., 2021)
19JY-6.59	491	289	0.59	0.0586	0.0007	0.67	0.0093	0.0829	0.0008	553	27	521	7	513	5		(Chen et al., 2021)
19JY-6.60	89	56	0.62	0.067	0.0011	1.2994	0.0224	0.1407	0.0014	837	34	845	15	849	8		(Chen et al., 2021)
19JY-6.61	164	117	0.72	0.0559	0.001	0.6325	0.012	0.0821	0.0008	447	40	498	9	509	5		(Chen et al., 2021)
19JY-6.62	194	73	0.38	0.0584	0.0008	0.6603	0.0095	0.0821	0.0008	543	28	515	7	508	5		(Chen et al., 2021)
19JY-6.63	137	74	0.54	0.0711	0.0009	1.5753	0.0222	0.1607	0.0016	960	26	961	14	961	9		(Chen et al., 2021)
19JY-6.64	107	32	0.3	0.0567	0.0008	0.6479	0.0101	0.0829	0.0008	479	31	507	8	513	5		(Chen et al., 2021)
19JY-6.65	72	38	0.53	0.0592	0.0015	0.6618	0.0176	0.0811	0.0008	574	55	516	14	503	5		(Chen et al., 2021)
19JY-6.66	259	132	0.51	0.0576	0.0007	0.6413	0.0092	0.0808	0.0008	513	28	503	7	501	5		(Chen et al., 2021)
19JY-6.67	163	66	0.41	0.057	0.0008	0.6326	0.0096	0.0805	0.0008	490	30	498	8	499	5		(Chen et al., 2021)
19JY-6.68	262	109	0.41	0.0577	0.0007	0.6442	0.0091	0.0809	0.0008	519	27	505	7	502	5		(Chen et al., 2021)
19JY-6.69	212	84	0.4	0.0567	0.0007	0.636	0.0089	0.0814	0.0008	479	28	500	7	504	5		(Chen et al., 2021)
19JY-6.70	543	349	0.64	0.0582	0.0007	0.6505	0.0089	0.0811	0.0008	537	27	509	7	503	5		(Chen et al., 2021)
19JY-7 (Cambrian strata)
19JY-7-1.01	217	103	0.48	0.0576	0.0008	0.6765	0.0113	0.0851	0.0009	516	31	525	9	527	6		(Chen et al., 2021)
19JY-7-1.02	69	30	0.44	0.0689	0.001	1.4638	0.0235	0.1542	0.0017	894	29	916	15	924	10		(Chen et al., 2021)
19JY-7-1.03	180	156	0.87	0.0668	0.0009	1.2451	0.0197	0.1353	0.0015	830	29	821	13	818	9		(Chen et al., 2021)
19JY-7-1.04	168	173	1.03	0.1009	0.0013	3.969	0.0564	0.2852	0.003	1641	24	1628	23	1618	17		(Chen et al., 2021)
19JY-7-1.05	125	98	0.78	0.0605	0.0012	0.7433	0.0159	0.0892	0.001	620	43	564	12	551	6		(Chen et al., 2021)
19JY-7-1.06	216	122	0.56	0.0572	0.0008	0.6856	0.0106	0.087	0.0009	497	30	530	8	538	6		(Chen et al., 2021)
19JY-7-1.07	137	54	0.4	0.0598	0.0008	0.772	0.013	0.0937	0.0011	595	30	581	10	577	7		(Chen et al., 2021)
19JY-7-1.08	199	111	0.55	0.0581	0.0008	0.7303	0.0117	0.0911	0.001	535	30	557	9	562	6		(Chen et al., 2021)
19JY-7-1.09	178	83	0.47	0.0578	0.0008	0.7154	0.0114	0.0897	0.001	524	30	548	9	554	6		(Chen et al., 2021)
19JY-7-1.10	592	458	0.77	0.0583	0.0007	0.7014	0.0102	0.0873	0.0009	539	27	540	8	540	6		(Chen et al., 2021)
19JY-7-1.11	243	134	0.55	0.058	0.0008	0.7029	0.0106	0.0879	0.0009	530	29	541	8	543	6		(Chen et al., 2021)
19JY-7-1.12	231	116	0.5	0.0587	0.0008	0.6882	0.0102	0.085	0.0009	557	29	532	8	526	5		(Chen et al., 2021)
19JY-7-1.13	464	267	0.58	0.059	0.0007	0.6838	0.0095	0.0841	0.0008	565	27	529	7	521	5		(Chen et al., 2021)
19JY-7-1.14	259	152	0.59	0.0582	0.0008	0.6815	0.0106	0.0849	0.0009	538	29	528	8	525	6		(Chen et al., 2021)
19JY-7-1.15	546	409	0.75	0.0584	0.0007	0.6754	0.0096	0.0839	0.0008	546	28	524	7	519	5		(Chen et al., 2021)
19JY-7-1.16	212	50	0.23	0.0578	0.0007	0.6599	0.0092	0.0828	0.0008	521	27	515	7	513	5		(Chen et al., 2021)
19JY-7-1.17	353	278	0.79	0.0657	0.0008	1.1804	0.0167	0.1303	0.0014	796	26	791	11	790	8		(Chen et al., 2021)
19JY-7-1.18	153	79	0.51	0.057	0.0009	0.6539	0.0116	0.0832	0.0008	491	36	511	9	515	5		(Chen et al., 2021)
19JY-7-1.19	94	25	0.27	0.058	0.0009	0.662	0.0108	0.0828	0.0008	530	32	516	8	513	5		(Chen et al., 2021)
19JY-7-1.20	67	38	0.57	0.0691	0.0011	1.4732	0.0263	0.1547	0.0016	900	33	919	16	927	9		(Chen et al., 2021)
19JY-7-1.21	327	183	0.56	0.0587	0.0008	0.6613	0.0097	0.0818	0.0008	555	28	515	8	507	5		(Chen et al., 2021)
19JY-7-1.22	113	30	0.27	0.058	0.0008	0.6711	0.0104	0.0839	0.0008	529	32	521	8	520	5		(Chen et al., 2021)
19JY-7-1.23	440	163	0.37	0.0564	0.0007	0.6396	0.0089	0.0822	0.0008	470	27	502	7	509	5		(Chen et al., 2021)
19JY-7-1.24	255	123	0.48	0.0571	0.0008	0.6465	0.0094	0.0821	0.0008	495	29	506	7	509	5		(Chen et al., 2021)
19JY-7-1.25	94	26	0.28	0.0575	0.0009	0.6585	0.0108	0.0831	0.0008	510	33	514	8	515	5		(Chen et al., 2021)
19JY-7-1.26	67	41	0.61	0.0708	0.0011	1.5304	0.0268	0.1567	0.0016	953	32	943	16	938	9		(Chen et al., 2021)
19JY-7-1.27	37	10	0.28	0.0582	0.0015	0.6956	0.0185	0.0866	0.0009	539	58	536	14	536	6		(Chen et al., 2021)
19JY-7-1.28	195	119	0.61	0.0579	0.0009	0.7036	0.0122	0.0881	0.001	526	34	541	9	544	6		(Chen et al., 2021)
19JY-7-1.29	362	319	0.88	0.0579	0.0008	0.6799	0.0104	0.0851	0.0009	528	30	527	8	526	5		(Chen et al., 2021)
19JY-7-1.30	353	271	0.77	0.0586	0.0008	0.6889	0.0104	0.0853	0.0009	551	29	532	8	528	6		(Chen et al., 2021)
19JY-7-1.31	112	38	0.34	0.0569	0.0009	0.6592	0.0112	0.0841	0.001	486	34	514	9	520	6		(Chen et al., 2021)
19JY-7-1.32	84	58	0.7	0.06	0.0017	0.7029	0.0204	0.085	0.0009	603	60	541	16	526	6		(Chen et al., 2021)
19JY-7-1.33	212	138	0.65	0.0592	0.0009	0.683	0.011	0.0836	0.0009	576	32	529	8	518	5		(Chen et al., 2021)
19JY-7-1.34	307	129	0.42	0.0583	0.0007	0.6742	0.0097	0.0838	0.0009	542	27	523	8	519	5		(Chen et al., 2021)
19JY-7-1.35	626	345	0.55	0.0577	0.0007	0.6406	0.0089	0.0806	0.0009	517	26	503	7	500	5		(Chen et al., 2021)
19JY-7-1.36	164	72	0.44	0.0577	0.0008	0.6493	0.0099	0.0816	0.0008	520	30	508	8	505	5		(Chen et al., 2021)
19JY-7-1.37	78	26	0.33	0.0563	0.0009	0.6307	0.0113	0.0812	0.0008	465	37	497	9	503	5		(Chen et al., 2021)
19JY-7-1.38	102	59	0.58	0.0572	0.0012	0.6692	0.0148	0.0848	0.0009	500	45	520	11	525	6		(Chen et al., 2021)
19JY-7-1.39	142	83	0.59	0.0588	0.001	0.6793	0.0121	0.0838	0.0008	559	36	526	9	519	5		(Chen et al., 2021)
19JY-7-1.40	78	22	0.28	0.057	0.0009	0.66	0.0117	0.084	0.0009	491	35	515	9	520	6		(Chen et al., 2021)
19JY-7-1.41	96	34	0.36	0.0578	0.0009	0.6572	0.0111	0.0825	0.0008	521	35	513	9	511	5		(Chen et al., 2021)
19JY-7-1.42	286	116	0.4	0.0585	0.0007	0.6581	0.0092	0.0815	0.0008	550	27	513	7	505	5		(Chen et al., 2021)
19JY-7-1.43	208	54	0.26	0.0576	0.0007	0.6395	0.0088	0.0805	0.0008	516	27	502	7	499	5		(Chen et al., 2021)
19JY-7-1.44	286	116	0.41	0.0566	0.0007	0.6438	0.009	0.0825	0.0008	477	27	505	7	511	5		(Chen et al., 2021)
19JY-7-1.45	183	88	0.48	0.0572	0.0008	0.6394	0.0098	0.081	0.0008	500	31	502	8	502	5		(Chen et al., 2021)
19JY-7-1.46	203	104	0.51	0.0581	0.0008	0.6791	0.0102	0.0847	0.0008	535	29	526	8	524	5		(Chen et al., 2021)
19JY-7-1.47	343	180	0.53	0.0575	0.0007	0.6476	0.0104	0.0817	0.001	512	27	507	8	506	6		(Chen et al., 2021)
19JY-7-1.48	31	6	0.2	0.0577	0.0012	0.6733	0.0146	0.0846	0.0009	519	45	523	11	524	6		(Chen et al., 2021)
19JY-7-1.49	93	43	0.47	0.0599	0.0011	0.6811	0.0133	0.0824	0.0008	601	39	527	10	511	5		(Chen et al., 2021)
19JY-7-1.50	40	32	0.81	0.0695	0.0024	1.3498	0.049	0.1409	0.0015	913	71	867	31	850	9		(Chen et al., 2021)
19JY-7-1.51	126	94	0.75	0.0729	0.001	1.6923	0.0249	0.1683	0.0017	1012	27	1006	15	1003	10		(Chen et al., 2021)
19JY-7-1.52	166	58	0.35	0.0589	0.0007	0.6723	0.0096	0.0828	0.0008	563	28	522	7	513	5		(Chen et al., 2021)
19JY-7-1.53	301	163	0.54	0.0586	0.0007	0.6848	0.0097	0.0848	0.0009	551	27	530	7	525	5		(Chen et al., 2021)
19JY-7-1.54	278	135	0.49	0.0594	0.001	0.687	0.0138	0.0839	0.0008	583	37	531	11	519	5		(Chen et al., 2021)
19JY-7-1.55	258	77	0.3	0.0576	0.0007	0.6543	0.0089	0.0824	0.0008	514	26	511	7	510	5		(Chen et al., 2021)
19JY-7-1.56	192	59	0.31	0.0568	0.0007	0.6376	0.0091	0.0814	0.0008	484	28	501	7	505	5		(Chen et al., 2021)
19JY-7-1.57	158	85	0.54	0.058	0.0009	0.6359	0.0112	0.0796	0.0008	529	35	500	9	493	5		(Chen et al., 2021)
19JY-7-1.58	271	134	0.49	0.0587	0.001	0.671	0.0131	0.0829	0.0008	557	37	521	10	513	5		(Chen et al., 2021)
19JY-7-1.59	234	100	0.43	0.0573	0.0007	0.6411	0.0092	0.0812	0.0008	502	28	503	7	503	5		(Chen et al., 2021)
19JY-7-1.60	301	105	0.35	0.0584	0.0007	0.6527	0.009	0.081	0.0008	547	27	510	7	502	5		(Chen et al., 2021)
19JY-7-1.61	174	73	0.42	0.0584	0.0008	0.6541	0.0101	0.0812	0.0008	545	31	511	8	504	5		(Chen et al., 2021)
19JY-7-1.62	265	117	0.44	0.058	0.0007	0.6404	0.0091	0.0801	0.0008	530	28	503	7	496	5		(Chen et al., 2021)
19JY-7-1.63	227	109	0.48	0.0584	0.0008	0.6488	0.0094	0.0806	0.0008	545	28	508	7	500	5		(Chen et al., 2021)
19JY-7-1.64	281	112	0.4	0.0573	0.0007	0.6253	0.009	0.0792	0.0008	502	27	493	7	491	5		(Chen et al., 2021)
19JY-7-1.65	119	44	0.36	0.0566	0.0009	0.6448	0.0106	0.0826	0.0008	477	34	505	8	511	5		(Chen et al., 2021)
19JY-7-1.66	138	84	0.61	0.0585	0.001	0.6599	0.0122	0.0818	0.0008	549	38	515	9	507	5		(Chen et al., 2021)
19JY-7-1.67	46	16	0.34	0.0595	0.0015	0.6552	0.0172	0.0799	0.0008	584	54	512	13	496	5		(Chen et al., 2021)
19JY-7-1.68	167	51	0.3	0.057	0.0007	0.6384	0.0091	0.0812	0.0008	492	29	501	7	503	5		(Chen et al., 2021)
19JY-7-2.01	460	245	0.53	0.0581	0.0007	0.6624	0.0095	0.0827	0.0008	533	28	516	7	512	5		(Chen et al., 2021)
19JY-7-2.02	201	100	0.5	0.0571	0.0009	0.6526	0.011	0.0828	0.0008	497	34	510	9	513	5		(Chen et al., 2021)
19JY-7-2.03	338	215	0.64	0.0593	0.0009	0.6632	0.0106	0.0812	0.0008	577	31	517	8	503	5		(Chen et al., 2021)
19JY-7-2.04	263	152	0.58	0.0582	0.0009	0.6423	0.0111	0.0801	0.0009	537	34	504	9	497	5		(Chen et al., 2021)
19JY-7-2.05	612	658	1.08	0.058	0.0008	0.6468	0.0098	0.0809	0.0008	530	30	506	8	501	5		(Chen et al., 2021)
19JY-7-2.06	132	72	0.54	0.1425	0.0018	8.2543	0.1238	0.42	0.0045	2258	22	2259	34	2261	24		(Chen et al., 2021)
19JY-7-2.07	324	124	0.38	0.0586	0.0008	0.6574	0.0095	0.0814	0.0008	552	29	513	7	504	5		(Chen et al., 2021)
19JY-7-2.08	543	504	0.93	0.0588	0.0009	0.6607	0.0106	0.0815	0.0008	558	32	515	8	505	5		(Chen et al., 2021)
19JY-7-2.09	128	97	0.76	0.0594	0.0016	0.6634	0.0184	0.081	0.0008	581	58	517	14	502	5		(Chen et al., 2021)
19JY-7-2.10	137	84	0.61	0.0586	0.0018	0.6555	0.0215	0.0811	0.001	553	65	512	17	503	6		(Chen et al., 2021)
19JY-7-2.11	122	52	0.43	0.0565	0.0011	0.6361	0.0127	0.0817	0.0008	471	42	500	10	506	5		(Chen et al., 2021)
19JY-7-2.12	417	325	0.78	0.059	0.0008	0.6611	0.0099	0.0813	0.0008	566	29	515	8	504	5		(Chen et al., 2021)
19JY-7-2.13	238	96	0.4	0.0575	0.0008	0.6445	0.0104	0.0814	0.0008	509	32	505	8	504	5		(Chen et al., 2021)
19JY-7-2.14	161	58	0.36	0.0586	0.0008	0.6648	0.0101	0.0822	0.0008	553	30	518	8	510	5		(Chen et al., 2021)
19JY-7-2.15	80	44	0.55	0.0611	0.0015	0.6946	0.0178	0.0824	0.0008	644	54	536	14	510	5		(Chen et al., 2021)
19JY-7-2.16	262	172	0.66	0.0603	0.0009	0.6887	0.0111	0.0828	0.0009	615	31	532	9	513	5		(Chen et al., 2021)
19JY-7-2.17	837	501	0.6	0.059	0.0008	0.6724	0.0114	0.0826	0.001	569	29	522	9	512	6		(Chen et al., 2021)
19JY-7-2.18	170	106	0.63	0.0568	0.001	0.6473	0.0141	0.0827	0.0011	483	40	507	11	512	7		(Chen et al., 2021)
19JY-7-2.19	211	246	1.17	0.0561	0.0016	0.6475	0.0183	0.0837	0.0009	458	61	507	14	518	6		(Chen et al., 2021)
19JY-7-2.20	150	94	0.63	0.0591	0.0013	0.661	0.0153	0.0811	0.0009	571	49	515	12	503	5		(Chen et al., 2021)
19JY-7-2.21	65	42	0.64	0.0571	0.0033	0.6595	0.0402	0.0838	0.0009	495	129	514	31	519	6		(Chen et al., 2021)
19JY-7-2.22	226	147	0.65	0.0571	0.0014	0.6545	0.0165	0.0832	0.0008	494	55	511	13	515	5		(Chen et al., 2021)
19JY-7-2.23	374	193	0.52	0.0573	0.0008	0.6597	0.0099	0.0835	0.0009	504	29	514	8	517	5		(Chen et al., 2021)
19JY-7-2.24	158	66	0.41	0.0581	0.001	0.6585	0.0121	0.0822	0.0008	534	36	514	9	509	5		(Chen et al., 2021)
19JY-7-2.25	403	161	0.4	0.0591	0.0008	0.7949	0.0124	0.0975	0.0011	571	28	594	9	600	7		(Chen et al., 2021)
19JY-7-2.26	288	224	0.78	0.059	0.001	0.6544	0.0116	0.0804	0.0008	568	36	511	9	499	5		(Chen et al., 2021)
19JY-7-2.27	73	32	0.44	0.0596	0.0015	0.663	0.0174	0.0806	0.0008	591	53	516	14	500	5		(Chen et al., 2021)
19JY-7-2.28	281	114	0.41	0.0569	0.0008	0.6368	0.0098	0.0812	0.0008	486	30	500	8	503	5		(Chen et al., 2021)
19JY-7-2.29	29	14	0.49	0.0566	0.0042	0.6265	0.0468	0.0803	0.0009	476	166	494	37	498	6		(Chen et al., 2021)
19JY-7-2.30	235	151	0.64	0.0582	0.001	0.669	0.0123	0.0834	0.0008	537	38	520	10	516	5		(Chen et al., 2021)
19JY-7-2.31	304	267	0.88	0.0576	0.001	0.6512	0.012	0.082	0.0009	516	37	509	9	508	5		(Chen et al., 2021)
19JY-7-2.32	213	144	0.68	0.0564	0.0011	0.6503	0.0139	0.0836	0.0009	468	45	509	11	518	6		(Chen et al., 2021)
19JY-7-2.33	59	20	0.33	0.0575	0.0022	0.6628	0.0275	0.0836	0.0009	510	86	516	21	518	6		(Chen et al., 2021)
19JY-7-2.34	202	119	0.59	0.0569	0.0009	0.67	0.0117	0.0853	0.0009	489	37	521	9	528	6		(Chen et al., 2021)
19JY-7-2.35	159	107	0.67	0.0553	0.0012	0.6474	0.0143	0.0849	0.0009	425	49	507	11	525	6		(Chen et al., 2021)
19JY-7-2.36	133	84	0.63	0.0579	0.0012	0.6697	0.0145	0.0839	0.0009	525	47	521	11	520	6		(Chen et al., 2021)
19JY-7-2.37	201	100	0.5	0.0574	0.001	0.6677	0.0137	0.0844	0.0009	507	38	519	11	522	6		(Chen et al., 2021)
19JY-7-2.38	112	38	0.34	0.0616	0.001	0.9214	0.021	0.1085	0.0019	659	34	663	15	664	11		(Chen et al., 2021)
19JY-7-2.39	276	147	0.53	0.0576	0.0009	0.6609	0.0111	0.0832	0.0008	514	33	515	9	515	5		(Chen et al., 2021)
19JY-7-2.40	62	43	0.71	0.0553	0.0025	0.63	0.0288	0.0826	0.0009	426	100	496	23	511	5		(Chen et al., 2021)
19JY-7-2.41	164	97	0.59	0.0556	0.001	0.6382	0.0124	0.0833	0.0008	436	41	501	10	516	5		(Chen et al., 2021)
19JY-7-2.42	338	133	0.39	0.0577	0.0008	0.6384	0.0096	0.0803	0.0008	518	29	501	8	498	5		(Chen et al., 2021)
19JY-7-2.43	180	140	0.78	0.0569	0.0013	0.6569	0.0159	0.0837	0.0009	489	50	513	12	518	6		(Chen et al., 2021)
19JY-7-2.44	139	87	0.63	0.0578	0.0012	0.6474	0.0138	0.0812	0.0009	522	44	507	11	504	5		(Chen et al., 2021)
19JY-7-2.45	572	237	0.41	0.0574	0.0008	0.6435	0.0098	0.0813	0.0008	508	29	504	8	504	5		(Chen et al., 2021)
19JY-7-2.46	106	73	0.69	0.0658	0.0018	1.1783	0.0338	0.1299	0.0013	799	56	791	23	788	8		(Chen et al., 2021)
19JY-7-2.47	137	61	0.44	0.0585	0.0014	0.6492	0.0165	0.0805	0.0008	548	53	508	13	499	5		(Chen et al., 2021)
19JY-7-2.48	292	87	0.3	0.058	0.0007	0.6528	0.0095	0.0817	0.0008	528	28	510	7	506	5		(Chen et al., 2021)
19JY-7-2.49	169	103	0.61	0.0594	0.0018	0.6638	0.0207	0.0811	0.0009	581	65	517	16	502	5		(Chen et al., 2021)
19JY-7-2.50	150	42	0.28	0.0577	0.0009	0.6349	0.0106	0.0798	0.0008	519	33	499	8	495	5		(Chen et al., 2021)
19JY-7-2.51	140	94	0.67	0.0572	0.0018	0.6445	0.021	0.0817	0.0009	500	70	505	16	506	5		(Chen et al., 2021)
19JY-7-2.52	412	203	0.49	0.0578	0.0008	0.6473	0.01	0.0812	0.0009	523	29	507	8	503	6		(Chen et al., 2021)
19JY-7-2.53	100	39	0.39	0.0567	0.0011	0.6496	0.0136	0.0831	0.0009	481	42	508	11	514	6		(Chen et al., 2021)
19JY-7-2.54	115	62	0.54	0.0585	0.0019	0.6685	0.0225	0.0828	0.001	549	71	520	18	513	6		(Chen et al., 2021)
19JY-7-2.55	206	55	0.27	0.0586	0.0008	0.6685	0.0107	0.0828	0.001	551	30	520	8	513	6		(Chen et al., 2021)
19JY-7-2.56	164	96	0.59	0.0568	0.0011	0.6546	0.014	0.0835	0.001	485	42	511	11	517	6		(Chen et al., 2021)
19JY-7-2.57	####	3118	1.38	0.0559	0.0007	0.6302	0.0088	0.0818	0.0008	448	28	496	7	507	5		(Chen et al., 2021)
19JY-7-2.58	322	287	0.89	0.0581	0.001	0.6603	0.0119	0.0824	0.0009	533	37	515	9	511	6		(Chen et al., 2021)
19JY-7-2.59	327	150	0.46	0.0584	0.0008	0.6499	0.01	0.0807	0.0009	544	29	508	8	501	5		(Chen et al., 2021)
19JY-7-2.60	257	151	0.59	0.0593	0.0009	0.663	0.0105	0.081	0.0008	579	32	516	8	502	5		(Chen et al., 2021)
19JY-7-2.61	306	248	0.81	0.0574	0.0009	0.6383	0.0106	0.0806	0.0008	507	33	501	8	500	5		(Chen et al., 2021)
19JY-7-2.62	246	103	0.42	0.0579	0.0009	0.6544	0.0106	0.082	0.0008	526	33	511	8	508	5		(Chen et al., 2021)
19JY-2 (Cambrian strata)
19JY-2.01	214	239	1.12	0.0634	0.0009	1.1911	0.0182	0.1363	0.0014	720	29	796	12	824	9		(Chen et al., 2021)
19JY-2.02	96	132	1.37	0.1128	0.0014	5.1851	0.076	0.3335	0.0035	1845	23	1850	27	1855	20		(Chen et al., 2021)
19JY-2.03	352	444	1.26	0.0717	0.0009	1.6777	0.0235	0.1698	0.0018	976	24	1000	14	1011	11		(Chen et al., 2021)
19JY-2.04	96	44	0.46	0.1887	0.0022	13.6377	0.1857	0.5241	0.0055	2731	19	2725	37	2716	29		(Chen et al., 2021)
19JY-2.05	487	668	1.37	0.073	0.0009	1.6273	0.0225	0.1616	0.0017	1015	24	981	14	966	10		(Chen et al., 2021)
19JY-2.06	161	155	0.97	0.1856	0.0022	13.2329	0.1889	0.5171	0.0057	2704	19	2696	38	2687	30		(Chen et al., 2021)
19JY-2.07	166	67	0.4	0.0586	0.0008	0.7508	0.0111	0.0929	0.001	553	28	569	8	573	6		(Chen et al., 2021)
19JY-2.08	158	139	0.88	0.0612	0.0015	0.7581	0.0215	0.0898	0.001	646	52	573	16	555	6		(Chen et al., 2021)
19JY-2.09	158	106	0.67	0.0654	0.0008	1.2573	0.0187	0.1395	0.0015	786	27	827	12	842	9		(Chen et al., 2021)
19JY-2.10	370	263	0.71	0.1628	0.0019	10.3933	0.1586	0.4629	0.0056	2485	19	2470	38	2452	30		(Chen et al., 2021)
19JY-2.11	219	160	0.73	0.1624	0.0019	10.3035	0.1534	0.4601	0.0056	2481	19	2462	37	2440	29		(Chen et al., 2021)
19JY-2.12	53	36	0.68	0.0757	0.0013	1.9098	0.0387	0.1831	0.002	1086	34	1084	22	1084	12		(Chen et al., 2021)
19JY-2.13	690	970	1.4	0.0601	0.0007	0.823	0.0115	0.0993	0.001	607	26	610	9	611	6		(Chen et al., 2021)
19JY-2.14	17	8	0.46	0.0644	0.0028	1.0708	0.0472	0.1205	0.0013	756	90	739	33	734	8		(Chen et al., 2021)
19JY-2.15	196	81	0.41	0.0648	0.0008	1.1841	0.0165	0.1325	0.0014	769	25	793	11	802	8		(Chen et al., 2021)
19JY-2.16	296	127	0.43	0.0715	0.0008	1.6412	0.0231	0.1666	0.0018	970	24	986	14	993	11		(Chen et al., 2021)
19JY-2.17	252	270	1.07	0.1633	0.0019	10.3929	0.1474	0.4615	0.0052	2491	19	2470	35	2446	27		(Chen et al., 2021)
19JY-2.18	135	62	0.46	0.0719	0.0009	1.7262	0.0247	0.1742	0.0019	982	24	1018	15	1035	11		(Chen et al., 2021)
19JY-2.19	28	7	0.25	0.0589	0.0014	0.7052	0.0174	0.0868	0.0009	564	51	542	13	537	6		(Chen et al., 2021)
19JY-2.20	108	85	0.79	0.0661	0.001	1.3275	0.0217	0.1456	0.0015	811	30	858	14	876	9		(Chen et al., 2021)
19JY-2.21	105	85	0.81	0.0646	0.0011	1.0541	0.0195	0.1183	0.0012	762	36	731	14	721	7		(Chen et al., 2021)
19JY-2.22	30	13	0.44	0.0753	0.0014	1.7062	0.0329	0.1644	0.0017	1076	36	1011	19	981	10		(Chen et al., 2021)
19JY-2.23	####	1274	1.15	0.0612	0.0007	0.8553	0.0119	0.1013	0.001	647	26	628	9	622	6		(Chen et al., 2021)
19JY-2.24	317	293	0.92	0.0717	0.0009	1.4863	0.0213	0.1503	0.0016	979	25	925	13	902	10		(Chen et al., 2021)
19JY-2.25	131	251	1.92	0.0655	0.0016	1.1777	0.0299	0.1305	0.0013	790	52	790	20	791	8		(Chen et al., 2021)
19JY-2.26	59	26	0.44	0.073	0.001	1.6249	0.0254	0.1613	0.0016	1015	28	980	15	964	10		(Chen et al., 2021)
19JY-2.27	78	44	0.56	0.0595	0.0013	0.678	0.0159	0.0827	0.0008	585	49	526	12	512	5		(Chen et al., 2021)
19JY-2.28	147	27	0.19	0.0709	0.0008	1.5572	0.0209	0.1593	0.0016	954	24	953	13	953	10		(Chen et al., 2021)
19JY-2.29	89	34	0.38	0.0713	0.0009	1.6215	0.0231	0.1649	0.0017	967	26	979	14	984	10		(Chen et al., 2021)
19JY-2.30	114	22	0.2	0.061	0.0007	0.8637	0.0121	0.1027	0.001	640	26	632	9	630	6		(Chen et al., 2021)
19JY-2.31	93	27	0.29	0.1188	0.0014	5.7393	0.0787	0.3504	0.0036	1938	21	1937	27	1937	20		(Chen et al., 2021)
19JY-2.32	225	86	0.38	0.1629	0.0019	10.4317	0.137	0.4644	0.0045	2486	20	2474	32	2459	24		(Chen et al., 2021)
19JY-2.33	182	80	0.44	0.0573	0.0007	0.6614	0.0097	0.0838	0.0008	502	29	515	8	519	5		(Chen et al., 2021)
19JY-2.34	93	75	0.81	0.2407	0.0028	20.495	0.2754	0.6176	0.0063	3124	18	3115	42	3100	32		(Chen et al., 2021)
19JY-2.35	14	3	0.19	0.066	0.0015	1.2305	0.0284	0.1353	0.0014	805	46	815	19	818	8		(Chen et al., 2021)
19JY-2.36	182	200	1.1	0.1621	0.0019	10.4927	0.1445	0.4695	0.005	2478	20	2479	34	2481	26		(Chen et al., 2021)
19JY-2.37	344	253	0.73	0.1602	0.0018	8.5552	0.1125	0.3874	0.0038	2458	20	2292	30	2111	21		(Chen et al., 2021)
19JY-2.38	222	323	1.46	0.0658	0.001	1.1893	0.019	0.1311	0.0013	801	31	796	13	794	8		(Chen et al., 2021)
19JY-2.39	134	31	0.23	0.2182	0.0026	17.6783	0.2709	0.5875	0.0069	2968	19	2972	46	2979	35		(Chen et al., 2021)
19JY-2.40	270	213	0.79	0.069	0.0008	1.3391	0.0185	0.1407	0.0014	899	25	863	12	849	9		(Chen et al., 2021)
19JY-2.41	104	82	0.8	0.1621	0.0021	10.3533	0.2119	0.4632	0.0065	2478	22	2467	50	2454	34		(Chen et al., 2021)
19JY-2.42	53	31	0.58	0.0637	0.0013	1.1317	0.0244	0.1289	0.0013	731	44	769	17	781	8		(Chen et al., 2021)
19JY-2.43	138	34	0.24	0.2221	0.0026	18.1641	0.2747	0.593	0.0068	2996	19	2998	45	3002	35		(Chen et al., 2021)
19JY-2.44	297	277	0.93	0.07	0.0008	1.5751	0.0217	0.1633	0.0017	927	25	960	13	975	10		(Chen et al., 2021)
19JY-2.45	120	145	1.2	0.0659	0.0013	1.1413	0.0233	0.1257	0.0012	802	41	773	16	763	8		(Chen et al., 2021)
19JY-2.46	77	21	0.27	0.2621	0.003	23.6969	0.3132	0.6556	0.0065	3260	18	3256	43	3250	32		(Chen et al., 2021)
19JY-2.47	222	322	1.45	0.0671	0.001	1.2118	0.0194	0.1309	0.0013	842	31	806	13	793	8		(Chen et al., 2021)
19JY-2.48	116	93	0.81	0.0652	0.0011	1.1367	0.0198	0.1265	0.0012	780	34	771	13	768	8		(Chen et al., 2021)
19JY-2.49	171	45	0.26	0.0711	0.0008	1.5331	0.0203	0.1564	0.0015	960	24	944	13	937	9		(Chen et al., 2021)
19JY-2.50	107	37	0.35	0.1451	0.0017	6.4386	0.0849	0.3218	0.0031	2289	20	2038	27	1799	18		(Chen et al., 2021)
19JY-2.51	100	76	0.76	0.1629	0.0021	10.441	0.2531	0.4648	0.008	2486	22	2475	60	2461	42		(Chen et al., 2021)
19JY-2.52	295	140	0.48	0.0563	0.0007	0.6655	0.0092	0.0857	0.0008	464	27	518	7	530	5		(Chen et al., 2021)
19JY-2.53	82	40	0.49	0.0662	0.0009	1.2585	0.0195	0.1378	0.0014	814	29	827	13	832	8		(Chen et al., 2021)
19JY-2.54	228	39	0.17	0.0568	0.0007	0.6523	0.0087	0.0833	0.0008	485	26	510	7	515	5		(Chen et al., 2021)
19JY-2.55	78	19	0.24	0.0554	0.0008	0.6688	0.0106	0.0875	0.0009	430	32	520	8	541	6		(Chen et al., 2021)
19JY-2.56	305	150	0.49	0.1639	0.0019	10.5196	0.1442	0.4656	0.0049	2496	19	2482	34	2464	26		(Chen et al., 2021)
19JY-2.57	112	60	0.54	0.0669	0.0009	1.2826	0.0184	0.139	0.0014	836	27	838	12	839	8		(Chen et al., 2021)
19JY-2.58	108	37	0.34	0.1452	0.0017	6.4713	0.0854	0.3233	0.0032	2290	20	2042	27	1806	18		(Chen et al., 2021)
19JY-2.59	367	218	0.59	0.0585	0.0007	0.662	0.0091	0.0821	0.0008	548	27	516	7	509	5		(Chen et al., 2021)
19JY-2.60	284	157	0.55	0.1607	0.0018	10.1929	0.1326	0.4601	0.0045	2463	19	2452	32	2440	24		(Chen et al., 2021)
19JY-2.61	39	14	0.37	0.0636	0.0017	0.7144	0.0194	0.0815	0.0008	727	56	547	15	505	5		(Chen et al., 2021)
19JY-2.62	96	31	0.32	0.267	0.0031	24.3339	0.3402	0.6611	0.0072	3288	18	3282	46	3271	35		(Chen et al., 2021)
19JY-2.63	564	307	0.54	0.0695	0.0008	1.277	0.0174	0.1332	0.0013	914	25	836	11	806	8		(Chen et al., 2021)
19JY-2.64	22	8	0.39	0.0609	0.002	0.953	0.0328	0.1135	0.0011	636	72	680	23	693	7		(Chen et al., 2021)
19JY-2.65	20	9	0.44	0.1797	0.0024	12.1595	0.1792	0.4907	0.0049	2650	22	2617	39	2574	26		(Chen et al., 2021)
19JY-2.66	33	6	0.18	0.0577	0.0013	0.7142	0.0162	0.0897	0.001	520	48	547	12	554	6		(Chen et al., 2021)
19JY-2.67	270	105	0.39	0.0649	0.0008	1.1929	0.0163	0.1333	0.0014	771	24	797	11	807	8		(Chen et al., 2021)
19JY-2.68	95	31	0.32	0.2681	0.0031	24.5255	0.3391	0.6636	0.0071	3295	18	3290	45	3281	35		(Chen et al., 2021)
19JY-2.69	563	345	0.61	0.0717	0.0008	1.3892	0.0189	0.1405	0.0015	977	24	884	12	848	9		(Chen et al., 2021)
19JY-2.70	120	134	1.11	0.0675	0.0012	1.2435	0.0228	0.1336	0.0014	853	36	820	15	808	8		(Chen et al., 2021)
19JY-2.71	100	71	0.72	0.0612	0.0013	0.7111	0.0152	0.0842	0.0008	648	44	545	12	521	5		(Chen et al., 2021)
19JY-2.72	313	307	0.98	0.0601	0.0008	0.81	0.0122	0.0978	0.001	606	29	602	9	602	6		(Chen et al., 2021)
19JY-2.73	60	26	0.44	0.0652	0.0011	1.0988	0.0211	0.1222	0.0015	781	35	753	14	743	9		(Chen et al., 2021)
19JY-2.74	222	191	0.86	0.0563	0.0008	0.6782	0.0111	0.0873	0.0009	466	33	526	9	540	6		(Chen et al., 2021)
19JY-2.75	127	59	0.47	0.0582	0.0009	0.7009	0.0119	0.0874	0.0009	536	34	539	9	540	6		(Chen et al., 2021)
19JY-2.76	376	443	1.18	0.161	0.0019	10.4013	0.1405	0.4685	0.0048	2466	19	2471	33	2477	26		(Chen et al., 2021)
19JY-2.77	186	258	1.39	0.0642	0.001	1.1437	0.0197	0.1292	0.0013	749	33	774	13	783	8		(Chen et al., 2021)
19JY-2.78	42	3	0.06	0.1242	0.0015	5.969	0.0808	0.3485	0.0035	2018	21	1971	27	1928	19		(Chen et al., 2021)
19JY-2.79	104	42	0.4	0.058	0.0009	0.676	0.0112	0.0846	0.0009	528	33	524	9	523	5		(Chen et al., 2021)
19JY-2.80	165	163	0.99	0.0732	0.0009	1.7714	0.0258	0.1754	0.0019	1020	26	1035	15	1042	11		(Chen et al., 2021)
19JY-2.81	37	27	0.73	0.0749	0.0017	1.8602	0.0444	0.1801	0.0019	1066	45	1067	25	1068	11		(Chen et al., 2021)
19JY-2.82	26	17	0.66	0.068	0.0023	1.4291	0.049	0.1523	0.0016	870	70	901	31	914	10		(Chen et al., 2021)
19JY-2.83	613	590	0.96	0.0582	0.0007	0.7133	0.01	0.0889	0.0009	536	26	547	8	549	6		(Chen et al., 2021)
19JY-2.84	64	8	0.13	0.0795	0.0009	2.2152	0.0301	0.202	0.0021	1185	23	1186	16	1186	12		(Chen et al., 2021)
19JY-2.85	92	51	0.55	0.1673	0.002	11.2082	0.1535	0.4859	0.0051	2531	20	2541	35	2553	27		(Chen et al., 2021)
19JY-2.86	165	65	0.39	0.0579	0.0008	0.686	0.0101	0.086	0.0009	525	28	530	8	532	5		(Chen et al., 2021)
19JY-2.87	57	95	1.68	0.0633	0.0027	1.1174	0.0486	0.1281	0.0014	717	91	762	33	777	8		(Chen et al., 2021)
19JY-2.88	135	53	0.4	0.0606	0.0008	0.8238	0.0144	0.0986	0.0012	624	29	610	11	606	7		(Chen et al., 2021)
19JY-2.89	275	167	0.61	0.0703	0.0008	1.4819	0.02	0.1528	0.0015	938	24	923	12	917	9		(Chen et al., 2021)
19JY-2.90	278	263	0.95	0.0668	0.0008	1.2161	0.017	0.1319	0.0013	833	26	808	11	799	8		(Chen et al., 2021)
19JY-2.91	175	94	0.54	0.0699	0.0008	1.5299	0.021	0.1588	0.0016	924	25	942	13	950	9		(Chen et al., 2021)
19JY-4 (Cambrian strata)
19JY-4.01	88	22	0.25	0.072	0.0009	1.6276	0.0228	0.164	0.0017	986	25	981	14	979	10		(Chen et al., 2021)
19JY-4.02	206	123	0.59	0.0678	0.0008	1.3201	0.0185	0.1412	0.0015	863	25	855	12	851	9		(Chen et al., 2021)
19JY-4.03	218	95	0.44	0.0722	0.0009	1.6068	0.0226	0.1613	0.0018	993	24	973	14	964	11		(Chen et al., 2021)
19JY-4.04	158	139	0.88	0.1685	0.0019	11.2131	0.1541	0.4826	0.0051	2543	19	2541	35	2538	27		(Chen et al., 2021)
19JY-4.05	236	226	0.96	0.0659	0.0009	1.2633	0.0192	0.139	0.0015	804	27	829	13	839	9		(Chen et al., 2021)
19JY-4.06	147	31	0.21	0.071	0.0008	1.6312	0.0222	0.1666	0.0017	958	24	982	13	993	10		(Chen et al., 2021)
19JY-4.07	617	661	1.07	0.067	0.0008	1.2916	0.0186	0.1397	0.0015	839	25	842	12	843	9		(Chen et al., 2021)
19JY-4.08	208	92	0.45	0.0579	0.0008	0.688	0.0105	0.0862	0.0009	525	30	532	8	533	6		(Chen et al., 2021)
19JY-4.09	270	254	0.94	0.0713	0.0009	1.6964	0.0235	0.1727	0.0018	965	25	1007	14	1027	10		(Chen et al., 2021)
19JY-4.10	118	92	0.79	0.0664	0.001	1.2435	0.0208	0.1358	0.0014	819	31	820	14	821	9		(Chen et al., 2021)
19JY-4.11	245	357	1.46	0.0689	0.001	1.4738	0.0241	0.1552	0.0017	895	29	920	15	930	10		(Chen et al., 2021)
19JY-4.12	282	281	1	0.0572	0.0009	0.7087	0.0116	0.0899	0.0009	497	33	544	9	555	6		(Chen et al., 2021)
19JY-4.13	894	884	0.99	0.0648	0.0008	1.0218	0.0135	0.1144	0.0011	767	25	715	9	698	7		(Chen et al., 2021)
19JY-4.14	430	548	1.27	0.0601	0.0008	0.8455	0.0128	0.102	0.001	607	30	622	9	626	6		(Chen et al., 2021)
19JY-4.15	43	14	0.33	0.157	0.0023	10.5286	0.1761	0.4863	0.0048	2424	24	2482	42	2555	25		(Chen et al., 2021)
19JY-4.16	52	38	0.73	0.0674	0.0017	1.2462	0.0325	0.1341	0.0014	851	53	822	21	811	8		(Chen et al., 2021)
19JY-4.17	90	52	0.58	0.0579	0.0012	0.7025	0.015	0.0879	0.0009	528	45	540	12	543	6		(Chen et al., 2021)
19JY-4.18	195	120	0.62	0.1632	0.0019	10.6184	0.15	0.4718	0.0053	2490	19	2490	35	2491	28		(Chen et al., 2021)
19JY-4.19	163	208	1.27	0.0628	0.0013	0.9495	0.0223	0.1097	0.0012	700	45	678	16	671	7		(Chen et al., 2021)
19JY-4.20	162	107	0.66	0.0593	0.001	0.6953	0.0122	0.085	0.0008	580	35	536	9	526	5		(Chen et al., 2021)
19JY-4.21	424	612	1.45	0.1085	0.0013	4.7604	0.0674	0.3181	0.0035	1775	21	1778	25	1780	19		(Chen et al., 2021)
19JY-4.22	70	43	0.62	0.0615	0.0013	0.9829	0.0222	0.1159	0.0012	658	46	695	16	707	7		(Chen et al., 2021)
19JY-4.23	224	194	0.87	0.0664	0.0009	1.1725	0.0181	0.1281	0.0013	818	29	788	12	777	8		(Chen et al., 2021)
19JY-4.24	360	158	0.44	0.0582	0.0007	0.7046	0.0099	0.0878	0.0009	537	26	542	8	543	6		(Chen et al., 2021)
19JY-4.25	159	31	0.2	0.1658	0.0019	9.5157	0.125	0.4162	0.0041	2516	20	2389	31	2243	22		(Chen et al., 2021)
19JY-4.26	372	269	0.72	0.0599	0.0008	0.7036	0.0102	0.0852	0.0009	599	27	541	8	527	5		(Chen et al., 2021)
19JY-4.27	154	318	2.06	0.1048	0.0014	4.3521	0.0643	0.3013	0.0032	1710	24	1703	25	1698	18		(Chen et al., 2021)
19JY-4.28	90	55	0.61	0.0673	0.0011	1.2484	0.0223	0.1344	0.0014	849	34	823	15	813	9		(Chen et al., 2021)
19JY-4.29	48	37	0.79	0.1285	0.0017	6.696	0.1006	0.378	0.0038	2077	24	2072	31	2067	21		(Chen et al., 2021)
19JY-4.30	204	129	0.63	0.0621	0.0008	0.8912	0.0135	0.1041	0.0011	678	29	647	10	638	7		(Chen et al., 2021)
19JY-4.31	81	59	0.73	0.0669	0.0012	1.1672	0.0229	0.1265	0.0013	835	39	785	15	768	8		(Chen et al., 2021)
19JY-4.32	94	52	0.56	0.0692	0.001	1.3655	0.0214	0.1431	0.0015	905	30	874	14	862	9		(Chen et al., 2021)
19JY-4.33	80	62	0.77	0.0637	0.0024	1.0342	0.0367	0.1177	0.0014	732	79	721	26	717	9		(Chen et al., 2021)
19JY-4.34	738	1139	1.54	0.0704	0.0008	1.4706	0.0204	0.1515	0.0015	941	24	918	13	909	9		(Chen et al., 2021)
19JY-4.35	155	331	2.13	0.1032	0.0013	4.2873	0.0636	0.3013	0.0032	1683	24	1691	25	1698	18		(Chen et al., 2021)
19JY-4.36	28	11	0.39	0.0714	0.0015	1.5644	0.0345	0.1589	0.0016	969	43	956	21	951	10		(Chen et al., 2021)
19JY-4.37	220	227	1.03	0.0655	0.0009	1.1719	0.018	0.1298	0.0014	790	29	788	12	787	8		(Chen et al., 2021)
19JY-4.38	136	75	0.55	0.0739	0.0009	1.7221	0.025	0.1691	0.0018	1038	25	1017	15	1007	11		(Chen et al., 2021)
19JY-4.39	338	243	0.72	0.066	0.0008	1.1238	0.0161	0.1234	0.0013	808	25	765	11	750	8		(Chen et al., 2021)
19JY-4.40	86	56	0.65	0.0588	0.0012	0.7763	0.0175	0.0957	0.001	561	46	583	13	589	6		(Chen et al., 2021)
19JY-4.41	563	343	0.61	0.0696	0.0008	1.3686	0.0245	0.1427	0.0021	915	24	876	16	860	13		(Chen et al., 2021)
19JY-4.42	323	179	0.55	0.0603	0.0008	0.6858	0.0098	0.0825	0.0008	615	27	530	8	511	5		(Chen et al., 2021)
19JY-4.43	62	34	0.55	0.1186	0.0019	5.5826	0.0964	0.3415	0.0034	1935	29	1913	33	1894	19		(Chen et al., 2021)
19JY-4.44	343	240	0.7	0.0669	0.0008	1.1765	0.0162	0.1275	0.0013	836	25	790	11	774	8		(Chen et al., 2021)
19JY-4.45	95	44	0.46	0.0647	0.0011	1.0569	0.02	0.1184	0.0012	766	37	732	14	721	7		(Chen et al., 2021)
19JY-4.46	103	46	0.44	0.0591	0.001	0.6744	0.0127	0.0827	0.0008	572	38	523	10	512	5		(Chen et al., 2021)
19JY-4.47	89	21	0.24	0.0735	0.0009	1.6347	0.0225	0.1613	0.0016	1028	25	984	14	964	10		(Chen et al., 2021)
19JY-4.48	259	208	0.8	0.0674	0.0009	1.2422	0.0176	0.1336	0.0013	850	26	820	12	809	8		(Chen et al., 2021)
19JY-4.49	220	143	0.65	0.1015	0.0012	4.0661	0.055	0.2904	0.0028	1653	22	1648	22	1644	16		(Chen et al., 2021)
19JY-4.50	270	206	0.76	0.1631	0.0019	10.6064	0.1399	0.4717	0.0046	2488	20	2489	33	2491	24		(Chen et al., 2021)
19JY-4.51	139	104	0.75	0.068	0.001	1.2071	0.0189	0.1287	0.0013	870	30	804	13	780	8		(Chen et al., 2021)
19JY-4.52	146	85	0.58	0.0692	0.0009	1.3031	0.0196	0.1366	0.0014	904	27	847	13	825	8		(Chen et al., 2021)
19JY-4.53	284	131	0.46	0.074	0.0009	1.5533	0.0215	0.1523	0.0015	1040	25	952	13	914	9		(Chen et al., 2021)
19JY-4.54	408	729	1.79	0.0614	0.0009	0.8101	0.0136	0.0957	0.001	654	33	602	10	589	6		(Chen et al., 2021)
19JY-4.55	78	47	0.6	0.0598	0.0014	0.7858	0.0199	0.0953	0.001	597	52	589	15	587	6		(Chen et al., 2021)
19JY-4.56	188	102	0.54	0.0633	0.0008	0.8878	0.0129	0.1018	0.001	717	28	645	9	625	6		(Chen et al., 2021)
19JY-4.57	57	14	0.24	0.1252	0.0015	6.3684	0.0865	0.3688	0.0037	2032	21	2028	28	2024	20		(Chen et al., 2021)
19JY-4.58	93	45	0.48	0.1321	0.0015	7.0562	0.0938	0.3874	0.0038	2126	20	2119	28	2111	21		(Chen et al., 2021)
19JY-4.59	220	181	0.82	0.0587	0.001	0.6882	0.0128	0.085	0.0008	555	38	532	10	526	5		(Chen et al., 2021)
19JY-4.60	181	137	0.76	0.0675	0.0018	1.1846	0.0344	0.1272	0.0014	855	57	793	23	772	9		(Chen et al., 2021)
19JY-4.61	192	114	0.59	0.0601	0.0008	0.6961	0.0108	0.084	0.0008	608	30	536	8	520	5		(Chen et al., 2021)
19JY-4.62	381	434	1.14	0.1112	0.0013	4.9202	0.0655	0.3209	0.0031	1819	21	1806	24	1794	17		(Chen et al., 2021)
19JY-4.63	246	129	0.52	0.1676	0.002	10.1191	0.1361	0.4379	0.0043	2534	20	2446	33	2341	23		(Chen et al., 2021)
19JY-4.64	113	49	0.43	0.1549	0.0019	9.4071	0.1277	0.4404	0.0043	2401	20	2379	32	2353	23		(Chen et al., 2021)
19JY-4.65	475	283	0.6	0.0911	0.0011	2.8277	0.0404	0.2251	0.0025	1449	22	1363	19	1309	14		(Chen et al., 2021)
19JY-4.66	299	341	1.14	0.1191	0.0014	5.7245	0.0788	0.3486	0.0037	1943	21	1935	27	1928	20		(Chen et al., 2021)
19JY-4.67	166	218	1.32	0.0658	0.0011	1.2531	0.0234	0.1381	0.0015	800	35	825	15	834	9		(Chen et al., 2021)
19JY-4.68	28	10	0.35	0.0731	0.0013	1.7358	0.0338	0.1721	0.0018	1018	37	1022	20	1024	11		(Chen et al., 2021)
19JY-4.69	183	130	0.71	0.0611	0.001	0.7212	0.0127	0.0856	0.0009	643	35	551	10	529	5		(Chen et al., 2021)
19JY-4.70	200	121	0.61	0.0713	0.0009	1.6295	0.0233	0.1657	0.0017	966	25	982	14	989	10		(Chen et al., 2021)
19JY-4.71	421	318	0.76	0.0583	0.0007	0.6913	0.0099	0.086	0.0009	540	28	534	8	532	5		(Chen et al., 2021)
19JY-10 (Cambrian strata)
19JY-10.01	213	212	0.99	0.0666	0.001	1.2997	0.0208	0.1415	0.0015	826	30	846	14	853	9		(Chen et al., 2021)
19JY-10.02	453	386	0.85	0.1802	0.0021	13.1365	0.1876	0.5287	0.0058	2655	19	2690	38	2736	30		(Chen et al., 2021)
19JY-10.03	238	313	1.32	0.1144	0.0014	5.1562	0.0727	0.3269	0.0035	1870	22	1845	26	1823	20		(Chen et al., 2021)
19JY-10.04	259	156	0.6	0.0704	0.0008	1.6972	0.0242	0.1749	0.0019	940	24	1007	14	1039	12		(Chen et al., 2021)
19JY-10.05	42	22	0.52	0.0584	0.0021	0.729	0.0269	0.0906	0.001	544	79	556	21	559	6		(Chen et al., 2021)
19JY-10.06	279	188	0.67	0.0865	0.001	2.7228	0.0397	0.2283	0.0025	1349	23	1335	19	1326	15		(Chen et al., 2021)
19JY-10.07	373	361	0.97	0.06	0.0009	0.7247	0.0126	0.0877	0.001	602	32	553	10	542	6		(Chen et al., 2021)
19JY-10.08	137	36	0.27	0.2643	0.0031	23.9901	0.3304	0.6584	0.0068	3272	19	3268	45	3261	33		(Chen et al., 2021)
19JY-10.09	154	112	0.72	0.0666	0.0009	1.3398	0.0209	0.1459	0.0015	826	30	863	13	878	9		(Chen et al., 2021)
19JY-10.10	136	34	0.25	0.2619	0.003	23.7902	0.3196	0.6587	0.0067	3258	18	3260	44	3262	33		(Chen et al., 2021)
19JY-10.11	506	334	0.66	0.1523	0.0017	8.5799	0.1159	0.4085	0.0042	2372	20	2294	31	2208	23		(Chen et al., 2021)
19JY-10.12	457	285	0.62	0.0587	0.0009	0.6512	0.0107	0.0805	0.0008	556	32	509	8	499	5		(Chen et al., 2021)
19JY-10.13	76	27	0.36	0.0598	0.0012	0.893	0.0186	0.1082	0.0012	598	42	648	14	663	7		(Chen et al., 2021)
19JY-10.14	378	223	0.59	0.147	0.0017	8.1208	0.1341	0.4006	0.0055	2311	20	2245	37	2172	30		(Chen et al., 2021)
19JY-10.15	770	407	0.53	0.0586	0.0007	0.7674	0.0102	0.095	0.001	551	25	578	8	585	6		(Chen et al., 2021)
19JY-10.16	157	157	1	0.066	0.0014	1.0279	0.0237	0.113	0.0012	805	44	718	17	690	7		(Chen et al., 2021)
19JY-10.17	633	777	1.23	0.0589	0.0008	0.6696	0.0113	0.0825	0.0009	563	31	520	9	511	5		(Chen et al., 2021)
19JY-10.18	466	348	0.75	0.064	0.0008	1.0741	0.0146	0.1217	0.0012	742	25	741	10	740	8		(Chen et al., 2021)
19JY-10.19	400	357	0.89	0.0785	0.0009	1.9065	0.0254	0.1762	0.0017	1159	23	1083	14	1046	10		(Chen et al., 2021)
19JY-10.20	220	216	0.98	0.1571	0.0018	9.1974	0.122	0.4247	0.0042	2424	20	2358	31	2282	23		(Chen et al., 2021)
19JY-10.21	367	538	1.47	0.0979	0.0012	3.7913	0.0517	0.2808	0.0028	1585	22	1591	22	1596	16		(Chen et al., 2021)
19JY-10.22	117	61	0.52	0.0599	0.0011	0.6758	0.0131	0.0818	0.0008	600	40	524	10	507	5		(Chen et al., 2021)
19JY-10.23	250	147	0.59	0.0625	0.0008	0.8821	0.0123	0.1023	0.001	691	27	642	9	628	6		(Chen et al., 2021)
19JY-10.24	510	540	1.06	0.0592	0.0008	0.6617	0.0094	0.081	0.0008	576	28	516	7	502	5		(Chen et al., 2021)
19JY-10.25	688	1000	1.45	0.0591	0.0008	0.6955	0.01	0.0854	0.0009	570	28	536	8	528	5		(Chen et al., 2021)
19JY-10.26	132	45	0.34	0.0819	0.001	2.2373	0.0298	0.1981	0.002	1243	23	1193	16	1165	12		(Chen et al., 2021)
19JY-10.27	261	313	1.2	0.0645	0.001	1.0859	0.0186	0.1221	0.0012	759	33	747	13	742	7		(Chen et al., 2021)
19JY-10.28	190	209	1.1	0.0666	0.001	1.1895	0.0193	0.1295	0.0013	826	31	796	13	785	8		(Chen et al., 2021)
19JY-10.29	242	98	0.41	0.0603	0.0007	0.7537	0.0103	0.0907	0.0009	614	26	570	8	559	5		(Chen et al., 2021)
19JY-10.30	163	112	0.69	0.0668	0.0011	1.1327	0.0205	0.1229	0.0012	833	35	769	14	747	7		(Chen et al., 2021)
19JY-10.31	133	113	0.84	0.0691	0.001	1.329	0.021	0.1395	0.0014	902	30	858	14	842	8		(Chen et al., 2021)
19JY-10.32	403	226	0.56	0.0601	0.0007	0.7457	0.0108	0.09	0.001	607	26	566	8	555	6		(Chen et al., 2021)
19JY-10.33	759	504	0.66	0.0629	0.0008	0.8522	0.0118	0.0983	0.001	704	25	626	9	604	6		(Chen et al., 2021)
19JY-10.34	201	327	1.62	0.0726	0.0011	1.4643	0.0255	0.1462	0.0015	1004	32	916	16	880	9		(Chen et al., 2021)
19JY-10.35	100	42	0.42	0.068	0.0051	1.138	0.0959	0.1214	0.004	869	154	772	65	738	25		(Chen et al., 2021)
19JY-10.36	151	116	0.77	0.0647	0.0009	1.1168	0.0173	0.1252	0.0013	765	30	761	12	760	8		(Chen et al., 2021)
19JY-10.37	403	216	0.54	0.0601	0.0007	0.7451	0.0107	0.09	0.001	605	26	565	8	555	6		(Chen et al., 2021)
19JY-10.38	496	360	0.73	0.0582	0.0007	0.6715	0.0094	0.0837	0.0008	538	27	522	7	518	5		(Chen et al., 2021)
19JY-10.39	362	213	0.59	0.0715	0.0008	1.573	0.022	0.1596	0.0017	971	24	960	13	955	10		(Chen et al., 2021)
19JY-10.40	34	21	0.62	0.1384	0.0017	7.7066	0.1096	0.4038	0.0041	2208	22	2197	31	2186	22		(Chen et al., 2021)
19JY-10.41	906	901	0.99	0.0663	0.0008	0.9945	0.014	0.1087	0.0011	817	25	701	10	665	7		(Chen et al., 2021)
19JY-10.42	97	50	0.51	0.0674	0.001	1.2299	0.0192	0.1323	0.0013	850	30	814	13	801	8		(Chen et al., 2021)
19JY-10.43	115	73	0.64	0.2472	0.0029	21.0171	0.2772	0.6165	0.0061	3167	18	3139	41	3096	31		(Chen et al., 2021)
19JY-10.44	314	199	0.63	0.0751	0.0009	1.674	0.0269	0.1616	0.0018	1072	25	999	16	966	11		(Chen et al., 2021)
19JY-10.45	301	251	0.83	0.1279	0.0015	6.6744	0.0882	0.3784	0.0037	2070	20	2069	27	2069	20		(Chen et al., 2021)
19JY-10.46	251	149	0.59	0.0712	0.0008	1.6509	0.0231	0.1682	0.0018	963	24	990	14	1002	11		(Chen et al., 2021)
19JY-10.47	161	142	0.88	0.0595	0.001	0.8422	0.0151	0.1027	0.0011	585	36	620	11	630	7		(Chen et al., 2021)
19JY-10.48	480	571	1.19	0.0676	0.0008	1.3271	0.0187	0.1424	0.0014	856	26	858	12	858	9		(Chen et al., 2021)
19JY-10.49	92	68	0.74	0.0667	0.0012	1.0994	0.023	0.1195	0.0013	829	39	753	16	728	8		(Chen et al., 2021)
19JY-10.50	480	482	1	0.0676	0.0008	1.2971	0.018	0.1391	0.0014	857	25	844	12	840	8		(Chen et al., 2021)
19JY-10.51	36	1	0.04	0.0671	0.0008	1.2889	0.0175	0.1393	0.0014	841	24	841	11	841	9		(Chen et al., 2021)
19JY-10.52	54	22	0.41	0.0705	0.0013	1.132	0.0228	0.1165	0.0012	942	39	769	15	711	8		(Chen et al., 2021)
19JY-10.53	130	78	0.59	0.0667	0.001	1.2735	0.0201	0.1384	0.0014	830	30	834	13	836	9		(Chen et al., 2021)
19JY-10.54	330	219	0.66	0.0665	0.0008	1.1702	0.0178	0.1276	0.0015	822	26	787	12	774	9		(Chen et al., 2021)
19JY-10.55	563	687	1.22	0.0673	0.0009	1.1444	0.0168	0.1234	0.0012	846	28	775	11	750	7		(Chen et al., 2021)
19JY-10.56	104	11	0.1	0.0726	0.0008	1.6219	0.0218	0.162	0.0017	1004	23	979	13	968	10		(Chen et al., 2021)
19JY-10.57	460	367	0.8	0.0671	0.0008	1.2419	0.0189	0.1343	0.0017	840	25	820	12	812	10		(Chen et al., 2021)
19JY-10.58	373	398	1.07	0.0618	0.0009	0.7068	0.0113	0.0829	0.0008	667	31	543	9	514	5		(Chen et al., 2021)
19JY-10.59	128	71	0.55	0.0644	0.0013	0.8314	0.0182	0.0936	0.0009	756	42	614	13	577	6		(Chen et al., 2021)
19JY-10.60	410	186	0.45	0.0725	0.0009	1.5972	0.0214	0.1598	0.0016	1000	24	969	13	955	9		(Chen et al., 2021)
19JY-10.61	26	1	0.03	0.0635	0.0009	0.8876	0.0144	0.1014	0.001	725	31	645	10	622	6		(Chen et al., 2021)
19JY-10.62	148	113	0.77	0.0694	0.001	1.455	0.0237	0.1521	0.0016	910	31	912	15	913	10		(Chen et al., 2021)
19JY-10.63	677	774	1.14	0.0607	0.0007	0.8808	0.0132	0.1053	0.0012	627	26	641	10	645	7		(Chen et al., 2021)
19JY-10.64	407	312	0.77	0.1869	0.0022	13.406	0.1755	0.5204	0.0051	2715	19	2709	35	2701	26		(Chen et al., 2021)
19JY-10.65	127	14	0.11	0.1594	0.0018	9.9302	0.1306	0.4518	0.0044	2449	20	2428	32	2403	24		(Chen et al., 2021)
19JY-10.66	238	200	0.84	0.1598	0.0019	10.1168	0.1379	0.4591	0.0047	2454	20	2446	33	2436	25		(Chen et al., 2021)
19JY-10.67	125	34	0.27	0.0577	0.0008	0.6613	0.0104	0.0832	0.0009	517	31	515	8	515	6		(Chen et al., 2021)
19JY-10.68	192	139	0.72	0.0663	0.0009	1.2109	0.0184	0.1324	0.0014	817	28	806	12	802	8		(Chen et al., 2021)
19JY-10.69	96	61	0.64	0.0671	0.0012	1.1444	0.0224	0.1237	0.0013	842	38	775	15	752	8		(Chen et al., 2021)
19JY-10.70	336	272	0.81	0.0694	0.0009	1.2287	0.0172	0.1284	0.0013	911	26	814	11	778	8		(Chen et al., 2021)
19JY-10.71	257	75	0.29	0.0597	0.0007	0.6718	0.0096	0.0817	0.0009	591	27	522	7	506	5		(Chen et al., 2021)
19JY-10.72	138	24	0.18	0.2835	0.0033	24.4738	0.3442	0.626	0.0064	3383	18	3287	46	3134	32		(Chen et al., 2021)
19JY-10.73	171	36	0.21	0.0714	0.0008	1.538	0.0211	0.1563	0.0016	968	24	946	13	936	10		(Chen et al., 2021)
19JY-10.74	126	77	0.61	0.0617	0.0011	0.834	0.0162	0.0981	0.001	663	39	616	12	603	6		(Chen et al., 2021)
19JY-14 (Cambrian strata)
19JY-14-1.01	204	180	0.88	0.0669	0.0009	1.2158	0.0197	0.1317	0.0015	836	29	808	13	798	9		(Chen et al., 2021)
19JY-14-1.02	150	43	0.29	0.073	0.0009	1.7145	0.0246	0.1704	0.0019	1013	24	1014	15	1014	11		(Chen et al., 2021)
19JY-14-1.03	290	183	0.63	0.0733	0.0009	1.7408	0.0244	0.1722	0.0019	1023	24	1024	14	1024	11		(Chen et al., 2021)
19JY-14-1.04	302	208	0.69	0.0731	0.0009	1.7265	0.0259	0.1714	0.002	1016	24	1018	15	1020	12		(Chen et al., 2021)
19JY-14-1.05	####	975	0.87	0.0704	0.0008	1.3803	0.0188	0.1421	0.0015	941	24	881	12	857	9		(Chen et al., 2021)
19JY-14-1.06	####	2240	1.78	0.1626	0.0019	9.9821	0.1322	0.4453	0.0044	2483	20	2433	32	2374	24		(Chen et al., 2021)
19JY-14-1.07	142	107	0.75	0.0601	0.0015	0.8614	0.0243	0.1039	0.0012	607	55	631	18	637	7		(Chen et al., 2021)
19JY-14-1.08	127	57	0.45	0.0737	0.001	1.6489	0.0269	0.1622	0.0018	1034	27	989	16	969	11		(Chen et al., 2021)
19JY-14-1.09	200	249	1.24	0.0686	0.0012	1.3021	0.0249	0.1376	0.0014	888	37	847	16	831	9		(Chen et al., 2021)
19JY-14-1.10	254	239	0.94	0.1659	0.0019	10.8172	0.149	0.4729	0.0051	2517	19	2508	35	2496	27		(Chen et al., 2021)
19JY-14-1.11	232	291	1.25	0.0676	0.001	1.2876	0.0215	0.1382	0.0015	855	30	840	14	835	9		(Chen et al., 2021)
19JY-14-1.12	65	24	0.37	0.0647	0.0015	0.9166	0.0229	0.1027	0.0011	766	50	661	16	630	7		(Chen et al., 2021)
19JY-14-1.13	342	484	1.41	0.2756	0.0032	25.5712	0.3411	0.6728	0.0068	3338	18	3330	44	3317	33		(Chen et al., 2021)
19JY-14-1.14	136	57	0.42	0.0705	0.0009	1.6036	0.0227	0.1649	0.0017	944	25	972	14	984	10		(Chen et al., 2021)
19JY-14-1.15	184	83	0.45	0.178	0.0021	12.3639	0.164	0.5037	0.0049	2634	19	2632	35	2630	26		(Chen et al., 2021)
19JY-14-1.16	551	568	1.03	0.0682	0.0009	1.169	0.0216	0.1243	0.0016	874	28	786	15	755	10		(Chen et al., 2021)
19JY-14-1.17	126	42	0.34	0.0608	0.0008	0.8748	0.0129	0.1043	0.0011	633	28	638	9	640	7		(Chen et al., 2021)
19JY-14-1.18	109	37	0.34	0.153	0.0018	9.4222	0.1263	0.4465	0.0045	2380	20	2380	32	2380	24		(Chen et al., 2021)
19JY-14-1.19	17	0	0.02	0.0668	0.0008	1.3067	0.0177	0.1419	0.0015	831	24	849	12	855	9		(Chen et al., 2021)
19JY-14-1.20	154	84	0.54	0.0581	0.0015	0.7113	0.0187	0.0887	0.001	535	57	546	14	548	6		(Chen et al., 2021)
19JY-14-1.21	334	143	0.43	0.057	0.0007	0.6664	0.0095	0.0849	0.0009	490	27	519	7	525	5		(Chen et al., 2021)
19JY-14-1.22	126	82	0.66	0.1816	0.0021	12.658	0.198	0.5056	0.0064	2667	19	2655	42	2638	34		(Chen et al., 2021)
19JY-14-1.23	103	45	0.43	0.0578	0.0011	0.661	0.0129	0.0829	0.0008	524	40	515	10	513	5		(Chen et al., 2021)
19JY-14-1.24	79	39	0.5	0.1655	0.002	10.333	0.1437	0.4529	0.0047	2512	20	2465	34	2408	25		(Chen et al., 2021)
19JY-14-1.25	199	89	0.45	0.1724	0.002	11.0078	0.1851	0.4632	0.0067	2581	19	2524	42	2454	35		(Chen et al., 2021)
19JY-14-1.26	121	64	0.53	0.0582	0.0011	0.6832	0.0142	0.0851	0.0009	538	41	529	11	527	6		(Chen et al., 2021)
19JY-14-1.27	367	270	0.73	0.0709	0.0008	1.6043	0.0231	0.1641	0.0018	954	24	972	14	980	11		(Chen et al., 2021)
19JY-14-1.28	343	136	0.4	0.0716	0.0008	1.506	0.0225	0.1525	0.0018	975	24	933	14	915	11		(Chen et al., 2021)
19JY-14-1.29	80	35	0.44	0.0689	0.001	1.3654	0.022	0.1438	0.0016	894	29	874	14	866	9		(Chen et al., 2021)
19JY-14-1.30	24	2	0.06	0.164	0.0019	10.5517	0.2222	0.4667	0.0084	2497	20	2484	52	2469	45		(Chen et al., 2021)
19JY-14-1.31	98	59	0.6	0.066	0.0011	1.1445	0.0209	0.1257	0.0013	808	35	775	14	763	8		(Chen et al., 2021)
19JY-14-1.32	218	69	0.32	0.0589	0.0007	0.6912	0.0097	0.085	0.0009	565	27	534	8	526	5		(Chen et al., 2021)
19JY-14-1.33	236	123	0.52	0.0746	0.0009	1.498	0.0209	0.1456	0.0015	1059	24	930	13	876	9		(Chen et al., 2021)
19JY-14-1.34	136	82	0.6	0.0595	0.001	0.6999	0.013	0.0854	0.0009	584	38	539	10	528	5		(Chen et al., 2021)
19JY-14-1.35	154	80	0.52	0.0607	0.0008	0.8297	0.013	0.0991	0.0011	630	30	613	10	609	6		(Chen et al., 2021)
19JY-14-1.36	156	56	0.36	0.0728	0.0009	1.6169	0.0221	0.1611	0.0016	1008	24	977	13	963	10		(Chen et al., 2021)
19JY-14-1.37	414	269	0.65	0.059	0.0007	0.6554	0.0091	0.0805	0.0008	568	27	512	7	499	5		(Chen et al., 2021)
19JY-14-1.38	104	41	0.39	0.1131	0.0013	5.1841	0.0713	0.3325	0.0035	1850	21	1850	25	1850	19		(Chen et al., 2021)
19JY-14-1.39	189	146	0.77	0.1691	0.002	11.3487	0.152	0.4867	0.0048	2549	20	2552	34	2556	25		(Chen et al., 2021)
19JY-14-1.40	148	95	0.64	0.0678	0.0009	1.2516	0.0193	0.1339	0.0013	862	29	824	13	810	8		(Chen et al., 2021)
19JY-14-1.41	99	32	0.33	0.0723	0.0009	1.5809	0.0225	0.1586	0.0016	995	25	963	14	949	10		(Chen et al., 2021)
19JY-14-1.42	234	124	0.53	0.0743	0.001	1.5065	0.0217	0.147	0.0015	1051	26	933	13	884	9		(Chen et al., 2021)
19JY-14-1.43	215	96	0.45	0.1647	0.0019	6.3246	0.0862	0.2785	0.003	2505	20	2022	28	1584	17		(Chen et al., 2021)
19JY-14-1.44	231	59	0.26	0.071	0.0008	1.4747	0.0205	0.1506	0.0016	959	24	920	13	904	10		(Chen et al., 2021)
19JY-14-1.45	89	103	1.16	0.07	0.002	1.3621	0.0405	0.1411	0.0016	929	58	873	26	851	9		(Chen et al., 2021)
19JY-14-1.46	193	119	0.62	0.0627	0.0008	0.9007	0.014	0.1042	0.0011	698	29	652	10	639	7		(Chen et al., 2021)
19JY-14-1.47	324	202	0.62	0.0704	0.0008	1.5323	0.0222	0.1578	0.0018	940	24	943	14	945	11		(Chen et al., 2021)
19JY-14-1.48	241	98	0.41	0.0722	0.0008	1.6706	0.0229	0.1678	0.0018	992	24	997	14	1000	10		(Chen et al., 2021)
19JY-14-1.49	563	718	1.27	0.0667	0.0008	1.1609	0.017	0.1262	0.0014	828	26	782	11	766	8		(Chen et al., 2021)
19JY-14-1.50	117	11	0.1	0.0687	0.0008	1.1484	0.0195	0.1212	0.0016	891	24	777	13	737	10		(Chen et al., 2021)
19JY-14-1.51	546	425	0.78	0.0605	0.0007	0.7454	0.0107	0.0893	0.0009	623	27	566	8	551	6		(Chen et al., 2021)
19JY-14-1.52	399	262	0.66	0.0584	0.0007	0.6564	0.0094	0.0815	0.0008	545	27	512	7	505	5		(Chen et al., 2021)
19JY-14-1.53	373	343	0.92	0.0651	0.0008	1.0952	0.0159	0.122	0.0012	778	27	751	11	742	7		(Chen et al., 2021)
19JY-14-1.54	72	32	0.44	0.163	0.0019	10.5696	0.1415	0.4702	0.0046	2487	20	2486	33	2484	24		(Chen et al., 2021)
19JY-14-1.55	168	84	0.5	0.0596	0.0009	0.7012	0.012	0.0853	0.0009	589	33	540	9	528	6		(Chen et al., 2021)
19JY-14-1.56	806	681	0.84	0.0715	0.0008	1.496	0.0209	0.1517	0.0017	972	24	929	13	911	10		(Chen et al., 2021)
19JY-14-1.57	365	185	0.51	0.1607	0.0019	7.6152	0.1124	0.3436	0.0042	2464	20	2187	32	1904	23		(Chen et al., 2021)
19JY-14-1.58	165	62	0.38	0.0579	0.0008	0.6567	0.0104	0.0822	0.0008	526	32	513	8	509	5		(Chen et al., 2021)
19JY-14-1.59	165	17	0.1	0.071	0.0008	1.4321	0.0214	0.1464	0.0017	956	24	902	13	881	10		(Chen et al., 2021)
19JY-14-1.60	90	31	0.34	0.0616	0.001	0.9095	0.0204	0.1071	0.0014	660	35	657	15	656	8		(Chen et al., 2021)
19JY-14-1.61	57	14	0.25	0.0599	0.0011	0.9056	0.0186	0.1096	0.0012	601	39	655	13	671	8		(Chen et al., 2021)
19JY-14-1.62	107	41	0.39	0.0726	0.0009	1.6673	0.0252	0.1665	0.0018	1004	26	996	15	993	11		(Chen et al., 2021)
19JY-14-1.63	171	55	0.32	0.0799	0.0009	2.1696	0.029	0.1969	0.002	1195	23	1171	16	1159	12		(Chen et al., 2021)
19JY-14-1.64	17	0	0.03	0.0987	0.0011	3.7892	0.0512	0.2783	0.0029	1601	22	1590	21	1583	16		(Chen et al., 2021)
19JY-14-1.65	127	40	0.32	0.0984	0.0012	3.7959	0.0703	0.2797	0.0042	1594	22	1592	29	1590	24		(Chen et al., 2021)
19JY-14-1.66	119	20	0.17	0.0714	0.0008	1.5595	0.0245	0.1584	0.002	969	24	954	15	948	12		(Chen et al., 2021)
19JY-14-1.67	39	15	0.38	0.0707	0.0013	1.4946	0.0305	0.1534	0.0016	947	39	928	19	920	10		(Chen et al., 2021)
19JY-14-1.68	145	142	0.98	0.1257	0.0015	6.4073	0.0875	0.3696	0.0037	2039	21	2033	28	2028	20		(Chen et al., 2021)
19JY-14-1.69	482	271	0.56	0.1283	0.0015	6.0462	0.0832	0.3419	0.0036	2074	21	1983	27	1896	20		(Chen et al., 2021)
19JY-14-1.70	121	26	0.21	0.0594	0.0008	0.6759	0.0101	0.0826	0.0008	581	29	524	8	511	5		(Chen et al., 2021)
19JY-14-1.71	468	323	0.69	0.0609	0.0007	0.7667	0.0107	0.0913	0.0009	636	26	578	8	563	6		(Chen et al., 2021)
19JY-14-1.72	76	32	0.42	0.0688	0.0011	1.1842	0.02	0.1248	0.0013	893	32	793	13	758	8		(Chen et al., 2021)
19JY-14-1.73	388	131	0.34	0.0717	0.0008	1.3598	0.0187	0.1375	0.0015	978	24	872	12	830	9		(Chen et al., 2021)
19JY-14-1.74	126	174	1.38	0.1864	0.0022	13.4296	0.2008	0.5226	0.0061	2711	19	2710	41	2710	31		(Chen et al., 2021)
19JY-14-1.75	219	115	0.52	0.0729	0.0009	1.7038	0.0261	0.1696	0.0019	1010	25	1010	15	1010	12		(Chen et al., 2021)
19JY-14-1.76	342	144	0.42	0.0623	0.0007	0.8498	0.0122	0.099	0.0011	683	26	625	9	608	7		(Chen et al., 2021)
19JY-14-1.77	123	224	1.83	0.0675	0.002	1.1712	0.0372	0.1258	0.0014	854	63	787	25	764	9		(Chen et al., 2021)
19JY-14-1.78	435	500	1.15	0.0644	0.0009	1.0789	0.0166	0.1216	0.0013	753	29	743	11	740	8		(Chen et al., 2021)
19JY-14-2.01	238	48	0.2	0.0705	0.0008	1.445	0.02	0.1487	0.0016	942	24	908	13	894	10		(Chen et al., 2021)
19JY-14-2.02	466	342	0.73	0.0605	0.0007	0.8781	0.0128	0.1053	0.0012	622	26	640	9	645	7		(Chen et al., 2021)
19JY-14-2.03	63	28	0.44	0.2763	0.0032	25.979	0.361	0.6819	0.0073	3342	18	3346	46	3352	36		(Chen et al., 2021)
19JY-14-2.04	288	251	0.87	0.0624	0.0011	0.9568	0.0195	0.1113	0.0012	687	38	682	14	680	7		(Chen et al., 2021)
19JY-14-2.05	157	98	0.63	0.1098	0.0013	4.7977	0.0682	0.3169	0.0035	1796	21	1785	25	1774	20		(Chen et al., 2021)
19JY-14-2.06	198	123	0.62	0.1477	0.0017	7.7119	0.1076	0.3788	0.0042	2319	20	2198	31	2071	23		(Chen et al., 2021)
19JY-14-2.07	238	379	1.59	0.1605	0.0021	10.1175	0.1462	0.4571	0.0046	2461	22	2446	35	2427	24		(Chen et al., 2021)
19JY-14-2.08	128	54	0.43	0.0663	0.0009	1.191	0.0184	0.1303	0.0014	816	28	796	12	790	8		(Chen et al., 2021)
19JY-14-2.09	242	223	0.92	0.1612	0.0019	10.2478	0.141	0.4612	0.0049	2468	19	2457	34	2445	26		(Chen et al., 2021)
19JY-14-2.10	130	85	0.65	0.0637	0.0026	0.8943	0.0355	0.1018	0.0012	731	87	649	26	625	7		(Chen et al., 2021)
19JY-14-2.11	417	426	1.02	0.0734	0.0009	1.6838	0.0229	0.1664	0.0017	1025	24	1002	14	992	10		(Chen et al., 2021)
19JY-14-2.12	222	143	0.64	0.0659	0.0008	1.1435	0.0166	0.1258	0.0013	805	27	774	11	764	8		(Chen et al., 2021)
19JY-14-2.13	222	221	1	0.1278	0.0015	6.5721	0.0891	0.3731	0.0037	2067	21	2056	28	2044	20		(Chen et al., 2021)
19JY-14-2.14	689	1252	1.82	0.1595	0.0019	9.9497	0.1346	0.4523	0.0045	2451	20	2430	33	2406	24		(Chen et al., 2021)
19JY-14-2.15	264	198	0.75	0.1661	0.0019	9.936	0.1349	0.4338	0.0043	2519	20	2429	33	2323	23		(Chen et al., 2021)
19JY-14-2.16	474	515	1.09	0.0591	0.0009	0.7193	0.0127	0.0883	0.001	570	32	550	10	546	6		(Chen et al., 2021)
19JY-14-2.17	353	277	0.78	0.0675	0.0009	1.3233	0.0185	0.1421	0.0015	854	26	856	12	857	9		(Chen et al., 2021)
19JY-14-2.18	114	32	0.28	0.1372	0.0016	6.9785	0.0914	0.369	0.0036	2192	20	2109	28	2025	20		(Chen et al., 2021)
19JY-14-2.19	314	472	1.5	0.0639	0.0008	1.1883	0.0184	0.1349	0.0014	737	28	795	12	816	9		(Chen et al., 2021)
19JY-14-2.20	122	136	1.12	0.1659	0.002	10.3512	0.1445	0.4526	0.0047	2516	20	2467	34	2407	25		(Chen et al., 2021)
19JY-14-2.21	99	56	0.56	0.0589	0.0011	0.756	0.0145	0.0931	0.0009	564	39	572	11	574	6		(Chen et al., 2021)
19JY-14-2.22	223	48	0.22	0.0707	0.0008	1.3789	0.021	0.1414	0.0018	950	24	880	13	853	11		(Chen et al., 2021)
19JY-14-2.23	260	135	0.52	0.0742	0.0009	1.7956	0.0248	0.1755	0.0019	1047	24	1044	14	1042	11		(Chen et al., 2021)
19JY-14-2.24	218	155	0.71	0.0626	0.0009	0.9755	0.0154	0.1131	0.0012	693	32	691	11	691	7		(Chen et al., 2021)
19JY-14-2.25	675	248	0.37	0.0633	0.0008	1.0084	0.014	0.1156	0.0012	717	26	708	10	705	7		(Chen et al., 2021)
19JY-14-2.26	84	61	0.73	0.0631	0.0015	1.0142	0.025	0.1165	0.0012	712	49	711	18	711	8		(Chen et al., 2021)
19JY-14-2.27	135	42	0.31	0.058	0.0008	0.6702	0.0114	0.0838	0.0009	529	32	521	9	519	6		(Chen et al., 2021)
19JY-14-2.28	175	120	0.68	0.0711	0.0009	1.4474	0.0217	0.1476	0.0015	961	27	909	14	888	9		(Chen et al., 2021)
19JY-14-2.29	175	44	0.25	0.0673	0.001	1.2652	0.0191	0.1364	0.0014	846	31	830	13	824	8		(Chen et al., 2021)
19JY-14-2.30	315	168	0.53	0.1656	0.0019	10.853	0.1448	0.4753	0.0048	2514	19	2511	33	2507	25		(Chen et al., 2021)
19JY-14-2.31	161	24	0.15	0.0922	0.0011	2.8375	0.0428	0.2232	0.0024	1471	23	1366	21	1299	14		(Chen et al., 2021)
19JY-14-2.32	185	76	0.41	0.0666	0.0013	1.1909	0.0276	0.1296	0.0015	826	40	796	18	786	9		(Chen et al., 2021)
19JY-14-2.33	221	121	0.55	0.1686	0.0022	8.834	0.1302	0.3799	0.0038	2544	22	2321	34	2076	21		(Chen et al., 2021)
19JY-14-2.34	84	37	0.44	0.0626	0.0016	0.9448	0.0231	0.1094	0.0012	696	56	675	16	669	7		(Chen et al., 2021)
19JY-14-2.35	292	82	0.28	0.0589	0.0007	0.6438	0.0088	0.0793	0.0008	562	26	505	7	492	5		(Chen et al., 2021)
19JY-14-2.36	169	56	0.33	0.147	0.0017	7.9195	0.1125	0.3906	0.0044	2312	20	2222	32	2126	24		(Chen et al., 2021)
19JY-14-2.37	204	83	0.41	0.0584	0.0008	0.6396	0.0098	0.0795	0.0008	544	30	502	8	493	5		(Chen et al., 2021)
19JY-14-2.38	227	137	0.6	0.0581	0.001	0.6556	0.0136	0.0818	0.0009	534	39	512	11	507	5		(Chen et al., 2021)
19JY-14-2.39	193	109	0.56	0.0573	0.0009	0.6574	0.011	0.0832	0.0009	504	34	513	9	515	6		(Chen et al., 2021)
19JY-14-2.40	47	21	0.46	0.0717	0.0012	1.6584	0.0297	0.1678	0.0018	976	33	993	18	1000	11		(Chen et al., 2021)
19JY-14-2.41	114	157	1.38	0.1651	0.0019	10.8161	0.1544	0.4752	0.0053	2508	20	2507	36	2506	28		(Chen et al., 2021)
19JY-14-2.42	95	39	0.41	0.0554	0.0011	0.6648	0.0143	0.0871	0.001	428	43	518	11	538	6		(Chen et al., 2021)
19JY-14-2.43	149	128	0.86	0.0802	0.0011	2.3035	0.0388	0.2084	0.0029	1201	27	1213	20	1220	17		(Chen et al., 2021)
19JY-14-2.44	69	41	0.59	0.1382	0.0016	7.7597	0.1161	0.4072	0.0045	2205	21	2204	33	2202	25		(Chen et al., 2021)
19JY-14-2.45	155	217	1.4	0.1672	0.002	11.0112	0.1517	0.4776	0.005	2530	20	2524	35	2517	26		(Chen et al., 2021)
19JY-14-2.46	157	103	0.65	0.0575	0.001	0.699	0.0138	0.0882	0.001	509	39	538	11	545	6		(Chen et al., 2021)
19JY-14-2.47	335	305	0.91	0.0588	0.0008	0.8817	0.014	0.1088	0.0012	559	29	642	10	666	7		(Chen et al., 2021)
19JY-14-2.48	140	24	0.17	0.1324	0.0015	7.1531	0.1031	0.3919	0.0045	2130	20	2131	31	2131	24		(Chen et al., 2021)
19JY-14-2.49	38	17	0.46	0.1754	0.0021	8.7624	0.12	0.3624	0.0036	2609	20	2314	32	1994	20		(Chen et al., 2021)
19JY-14-2.50	464	266	0.57	0.147	0.0017	5.8423	0.0811	0.2883	0.0029	2311	20	1953	27	1633	17		(Chen et al., 2021)
19JY-14-2.51	119	50	0.42	0.1636	0.0019	10.7627	0.1493	0.4771	0.0052	2493	19	2503	35	2515	27		(Chen et al., 2021)
19JY-14-2.52	211	150	0.71	0.058	0.0009	0.6852	0.0125	0.0857	0.0009	529	35	530	10	530	6		(Chen et al., 2021)
19JY-14-2.53	403	392	0.97	0.0626	0.0008	0.927	0.0139	0.1075	0.0011	693	28	666	10	658	7		(Chen et al., 2021)
19JY-14-2.54	275	184	0.67	0.1657	0.002	10.8957	0.1661	0.477	0.0059	2514	20	2514	38	2514	31		(Chen et al., 2021)
19JY-14-2.55	164	104	0.63	0.0681	0.0009	1.2988	0.0199	0.1383	0.0015	873	28	845	13	835	9		(Chen et al., 2021)
19JY-14-2.56	266	100	0.37	0.0725	0.0009	1.5089	0.0235	0.151	0.0019	1000	24	934	15	906	11		(Chen et al., 2021)
19JY-14-2.57	68	34	0.49	0.0667	0.0012	1.2156	0.0236	0.1321	0.0014	829	38	808	16	800	8		(Chen et al., 2021)
19JY-14-2.58	270	138	0.51	0.0577	0.0008	0.6569	0.0099	0.0826	0.0009	517	29	513	8	512	5		(Chen et al., 2021)
19JY-14-2.59	167	65	0.39	0.0718	0.0009	1.5824	0.0223	0.1598	0.0017	980	25	963	14	956	10		(Chen et al., 2021)
19JY-14-2.60	163	191	1.17	0.0688	0.0012	1.2018	0.0232	0.1267	0.0013	893	37	801	15	769	8		(Chen et al., 2021)
19JY-14-2.61	66	22	0.34	0.0733	0.0011	1.5998	0.0268	0.1584	0.0017	1021	30	970	16	948	10		(Chen et al., 2021)
19JY-14-2.62	314	223	0.71	0.1132	0.0013	5.1037	0.0679	0.3269	0.0032	1852	21	1837	24	1824	18		(Chen et al., 2021)
19JY-14-2.63	104	73	0.71	0.0631	0.0012	1.0349	0.0201	0.119	0.0012	711	39	721	14	725	7		(Chen et al., 2021)
19JY-14-2.64	112	43	0.39	0.0674	0.0009	1.1383	0.0169	0.1225	0.0012	850	27	772	11	745	8		(Chen et al., 2021)
19JY-14-2.65	474	173	0.36	0.066	0.0008	1.2026	0.0166	0.1321	0.0014	806	26	802	11	800	9		(Chen et al., 2021)
19JY-14-2.66	190	174	0.92	0.0578	0.0015	0.6831	0.0177	0.0857	0.0009	523	56	529	14	530	6		(Chen et al., 2021)
19JY-14-2.67	70	5	0.07	0.1286	0.0015	5.3359	0.0738	0.3009	0.0034	2079	21	1875	26	1696	19		(Chen et al., 2021)
19JY-21 (Cambrian strata)
19JY-21.01	120	126	1.05	0.0614	0.0013	0.8737	0.0201	0.1033	0.0011	652	47	638	15	633	7		(Chen et al., 2021)
19JY-21.02	199	93	0.46	0.1869	0.0021	13.5081	0.186	0.5242	0.0056	2715	19	2716	37	2717	29		(Chen et al., 2021)
19JY-21.03	313	173	0.55	0.0602	0.0009	0.7005	0.0115	0.0844	0.0009	610	32	539	9	522	6		(Chen et al., 2021)
19JY-21.04	72	28	0.38	0.0662	0.0015	1.2785	0.032	0.1401	0.0015	812	49	836	21	845	9		(Chen et al., 2021)
19JY-21.05	409	285	0.7	0.0561	0.0008	0.6394	0.0099	0.0827	0.0008	456	30	502	8	512	5		(Chen et al., 2021)
19JY-21.06	115	155	1.35	0.0679	0.0012	1.2193	0.023	0.1302	0.0014	865	36	809	15	789	8		(Chen et al., 2021)
19JY-21.07	220	125	0.57	0.059	0.0011	0.6784	0.0137	0.0834	0.0009	568	40	526	11	516	5		(Chen et al., 2021)
19JY-21.08	287	149	0.52	0.0731	0.0009	1.6479	0.0245	0.1635	0.0018	1017	25	989	15	976	11		(Chen et al., 2021)
19JY-21.09	303	182	0.6	0.058	0.0009	0.6656	0.011	0.0832	0.0009	531	32	518	9	515	5		(Chen et al., 2021)
19JY-21.10	286	204	0.71	0.0687	0.0009	1.299	0.019	0.1371	0.0015	891	26	845	12	828	9		(Chen et al., 2021)
19JY-21.11	170	154	0.91	0.0675	0.001	1.187	0.0198	0.1276	0.0014	852	30	795	13	774	8		(Chen et al., 2021)
19JY-21.12	323	189	0.58	0.0596	0.0008	0.685	0.0108	0.0833	0.0008	589	31	530	8	516	5		(Chen et al., 2021)
19JY-21.13	94	89	0.95	0.1197	0.0016	5.7002	0.0878	0.3453	0.0036	1952	23	1931	30	1912	20		(Chen et al., 2021)
19JY-21.14	456	223	0.49	0.113	0.0013	5.056	0.0682	0.3246	0.0033	1848	21	1829	25	1812	19		(Chen et al., 2021)
19JY-21.15	46	75	1.62	0.0724	0.0023	1.5596	0.052	0.1562	0.0017	997	65	954	32	936	10		(Chen et al., 2021)
19JY-21.16	447	176	0.39	0.059	0.0008	0.7175	0.0107	0.0883	0.0009	565	28	549	8	545	6		(Chen et al., 2021)
19JY-21.17	431	229	0.53	0.1134	0.0013	5.2222	0.0698	0.3341	0.0034	1854	21	1856	25	1858	19		(Chen et al., 2021)
19JY-21.18	344	164	0.48	0.0603	0.0008	0.7385	0.0113	0.0889	0.0009	614	30	562	9	549	6		(Chen et al., 2021)
19JY-21.19	382	227	0.59	0.0594	0.0008	0.6985	0.0109	0.0853	0.0009	582	30	538	8	528	5		(Chen et al., 2021)
19JY-21.20	267	103	0.39	0.0738	0.0009	1.6269	0.0231	0.1598	0.0017	1037	26	981	14	956	10		(Chen et al., 2021)
19JY-21.21	375	215	0.57	0.0595	0.0008	0.7102	0.0109	0.0865	0.0009	586	29	545	8	535	6		(Chen et al., 2021)
19JY-21.22	247	157	0.64	0.0594	0.001	0.6909	0.0123	0.0843	0.0009	583	35	533	9	522	5		(Chen et al., 2021)
19JY-21.23	287	166	0.58	0.0594	0.0009	0.7153	0.0122	0.0873	0.0009	583	33	548	9	539	6		(Chen et al., 2021)
19JY-21.24	150	52	0.35	0.0629	0.0012	0.9104	0.02	0.105	0.0011	705	42	657	14	643	7		(Chen et al., 2021)
19JY-21.25	274	124	0.45	0.0803	0.001	2.2091	0.0302	0.1996	0.002	1204	23	1184	16	1173	12		(Chen et al., 2021)
19JY-21.26	269	113	0.42	0.0602	0.001	0.6719	0.0117	0.0809	0.0008	611	34	522	9	502	5		(Chen et al., 2021)
19JY-21.27	355	294	0.83	0.0653	0.0008	1.1725	0.0169	0.1302	0.0014	785	26	788	11	789	8		(Chen et al., 2021)
19JY-21.28	408	517	1.27	0.074	0.0009	1.5503	0.0222	0.152	0.0015	1041	25	951	14	912	9		(Chen et al., 2021)
19JY-21.29	357	252	0.71	0.0597	0.0009	0.6821	0.0112	0.0828	0.0009	593	32	528	9	513	5		(Chen et al., 2021)
19JY-21.30	170	125	0.73	0.0656	0.001	1.1407	0.0193	0.1261	0.0013	795	33	773	13	765	8		(Chen et al., 2021)
19JY-21.31	623	246	0.39	0.0665	0.0008	1.0592	0.0148	0.1155	0.0012	823	25	733	10	704	7		(Chen et al., 2021)
19JY-21.32	575	284	0.49	0.0589	0.0007	0.6618	0.0094	0.0815	0.0008	564	27	516	7	505	5		(Chen et al., 2021)
19JY-21.33	301	47	0.15	0.1148	0.0014	4.9509	0.0685	0.3127	0.0032	1877	21	1811	25	1754	18		(Chen et al., 2021)
19JY-21.34	566	99	0.17	0.1658	0.0019	10.954	0.1522	0.4792	0.0052	2516	19	2519	35	2524	27		(Chen et al., 2021)
19JY-21.35	226	186	0.82	0.1046	0.0012	4.4083	0.0621	0.3057	0.0032	1707	22	1714	24	1719	18		(Chen et al., 2021)
19JY-21.36	504	165	0.33	0.0727	0.0009	1.608	0.0218	0.1603	0.0016	1006	24	973	13	959	10		(Chen et al., 2021)
19JY-21.37	405	184	0.45	0.0574	0.0008	0.6561	0.0099	0.083	0.0008	506	30	512	8	514	5		(Chen et al., 2021)
19JY-21.38	446	96	0.22	0.0721	0.0008	1.624	0.0221	0.1634	0.0017	989	24	980	13	975	10		(Chen et al., 2021)
19JY-21.39	127	46	0.36	0.058	0.0014	0.66	0.0171	0.0825	0.0008	532	54	515	13	511	5		(Chen et al., 2021)
19JY-21.40	170	99	0.58	0.2395	0.0028	18.419	0.2447	0.5578	0.0056	3117	18	3012	40	2858	29		(Chen et al., 2021)
19JY-21.41	203	116	0.57	0.0726	0.0009	1.5759	0.0227	0.1574	0.0016	1004	27	961	14	942	9		(Chen et al., 2021)
19JY-21.42	328	108	0.33	0.0583	0.0008	0.6787	0.0105	0.0844	0.0008	541	31	526	8	523	5		(Chen et al., 2021)
19JY-21.43	270	101	0.37	0.0676	0.0009	1.22	0.0177	0.1308	0.0013	858	27	810	12	792	8		(Chen et al., 2021)
19JY-21.44	389	79	0.2	0.0581	0.0008	0.6689	0.0101	0.0835	0.0008	534	30	520	8	517	5		(Chen et al., 2021)
19JY-21.45	46	35	0.76	0.0657	0.0025	1.2032	0.0471	0.1329	0.0014	795	81	802	31	804	8		(Chen et al., 2021)
19JY-21.46	333	403	1.21	0.0714	0.0009	1.5318	0.0209	0.1557	0.0016	968	24	943	13	933	9		(Chen et al., 2021)
19JY-21.47	272	79	0.29	0.0581	0.0009	0.6709	0.0112	0.0837	0.0008	535	34	521	9	518	5		(Chen et al., 2021)
19JY-21.48	393	152	0.39	0.06	0.0008	0.6822	0.0104	0.0825	0.0008	602	30	528	8	511	5		(Chen et al., 2021)
19JY-21.49	301	212	0.71	0.0651	0.0008	1.1633	0.0172	0.1295	0.0013	779	27	783	12	785	8		(Chen et al., 2021)
19JY-21.50	673	405	0.6	0.0962	0.0011	3.0086	0.0399	0.2268	0.0022	1552	22	1410	19	1318	13		(Chen et al., 2021)
19JY-21.51	175	44	0.25	0.0566	0.0013	0.6354	0.0159	0.0814	0.0008	478	53	499	13	504	5		(Chen et al., 2021)
19JY-21.52	218	61	0.28	0.064	0.001	0.8863	0.0148	0.1005	0.001	741	32	644	11	617	6		(Chen et al., 2021)
19JY-21.53	335	318	0.95	0.0579	0.0008	0.654	0.0103	0.0819	0.0008	526	31	511	8	508	5		(Chen et al., 2021)
19JY-21.54	423	167	0.39	0.0573	0.0008	0.6445	0.0095	0.0816	0.0008	503	29	505	7	506	5		(Chen et al., 2021)
19JY-21.55	192	57	0.3	0.1292	0.0015	6.6008	0.088	0.3705	0.0037	2087	20	2059	27	2032	20		(Chen et al., 2021)
19JY-21.56	502	173	0.34	0.0713	0.0008	1.5363	0.0206	0.1563	0.0016	966	24	945	13	936	9		(Chen et al., 2021)
19JY-21.57	168	113	0.67	0.166	0.0019	10.3754	0.1377	0.4532	0.0044	2518	20	2469	33	2409	24		(Chen et al., 2021)
19JY-21.58	421	177	0.42	0.0731	0.0009	1.6613	0.0225	0.1648	0.0016	1018	24	994	13	983	10		(Chen et al., 2021)
19JY-21.59	205	54	0.26	0.0656	0.0009	1.2188	0.0187	0.1348	0.0013	793	29	809	12	815	8		(Chen et al., 2021)
19JY-21.60	123	73	0.59	0.0684	0.0011	1.2648	0.0226	0.1342	0.0013	879	34	830	15	812	8		(Chen et al., 2021)
19JY-21.61	123	73	0.59	0.0683	0.0011	1.2646	0.0226	0.1343	0.0013	878	34	830	15	812	8		(Chen et al., 2021)
19JY-21.62	421	178	0.42	0.0727	0.0009	1.6608	0.0221	0.1656	0.0016	1007	24	994	13	988	10		(Chen et al., 2021)
19JY-21.63	395	125	0.32	0.0579	0.0008	0.7325	0.0113	0.0917	0.001	527	29	558	9	566	6		(Chen et al., 2021)
19JY-21.64	446	371	0.83	0.0583	0.0008	0.7042	0.0105	0.0876	0.0009	541	28	541	8	541	6		(Chen et al., 2021)
19JY-21.65	124	109	0.88	0.0662	0.0011	1.3035	0.0237	0.1427	0.0015	814	33	847	15	860	9		(Chen et al., 2021)
19JY-21.66	224	309	1.38	0.0653	0.0009	1.2479	0.0199	0.1387	0.0015	782	29	822	13	837	9		(Chen et al., 2021)
19JY-21.67	497	232	0.47	0.0578	0.0007	0.6913	0.0105	0.0867	0.0009	522	28	534	8	536	6		(Chen et al., 2021)
19JY-21.68	598	227	0.38	0.1841	0.0021	12.6824	0.1777	0.4998	0.0054	2690	19	2656	37	2613	28		(Chen et al., 2021)
19JY-21.69	431	156	0.36	0.1825	0.0021	12.8958	0.1778	0.5124	0.0055	2676	19	2672	37	2667	29		(Chen et al., 2021)
19JY-21.70	175	109	0.62	0.0621	0.001	0.8929	0.0156	0.1042	0.0011	679	35	648	11	639	7		(Chen et al., 2021)
19JY-21.71	349	167	0.48	0.0679	0.0009	1.2581	0.0177	0.1344	0.0013	866	26	827	12	813	8		(Chen et al., 2021)
19JY-21.72	321	184	0.57	0.0721	0.0009	1.7663	0.026	0.1776	0.002	989	25	1033	15	1054	12		(Chen et al., 2021)
19JY-21.73	273	210	0.77	0.0599	0.0009	0.824	0.0132	0.0998	0.001	598	31	610	10	613	6		(Chen et al., 2021)
WN9 (lower Cambrian Guojiaba Formation)
WN9-1			1.03	0.0635	0.0036	0.1272	0.0024	1.105	0.0638	724	114	772	14	756	31		(Luo et al., 2020)
WN9-2			1.04	0.0635	0.0026	0.1229	0.0015	1.079	0.0449	724	88	747	9	743	22		(Luo et al., 2020)
WN9-3			0.61	0.0629	0.0016	0.1392	0.0014	1.215	0.032	706	59	840	8	807	15		(Luo et al., 2020)
WN9-4			0.63	0.0625	0.0022	0.1194	0.0014	1.03	0.0357	700	74	727	8	719	18		(Luo et al., 2020)
WN9-5			1.12	0.0648	0.0026	0.1297	0.0017	1.16	0.0452	766	85	786	10	782	21		(Luo et al., 2020)
WN9-6			0.78	0.0624	0.0015	0.1118	0.0016	0.968	0.0254	687	55	683	9	687	13		(Luo et al., 2020)
WN9-7			0.69	0.0634	0.0022	0.1255	0.0016	1.1	0.038	720	69	762	9	753	18		(Luo et al., 2020)
WN9-8			0.76	0.064	0.0022	0.1198	0.003	1.068	0.0481	740	74	729	17	738	24		(Luo et al., 2020)
WN9-9			0.81	0.06	0.0017	0.093	0.0009	0.7703	0.0215	611	63	573	5	580	12		(Luo et al., 2020)
WN9-10			0.87	0.0637	0.0016	0.1154	0.0012	1.013	0.0236	731	52	704	7	710	12		(Luo et al., 2020)
WN9-11			0.55	0.065	0.0022	0.1323	0.0016	1.191	0.0422	776	77	801	9	796	20		(Luo et al., 2020)
WN9-12			0.59	0.0684	0.0024	0.1387	0.0017	1.315	0.0488	880	72	838	10	852	21		(Luo et al., 2020)
WN9-13			0.56	0.0622	0.0022	0.1037	0.0015	0.8879	0.0299	683	74	636	9	645	16		(Luo et al., 2020)
WN9-14			0.57	0.0651	0.0019	0.1411	0.0019	1.275	0.0399	776	59	851	11	835	18		(Luo et al., 2020)
WN9-15			0.78	0.0662	0.0028	0.1368	0.0019	1.24	0.0499	813	89	826	11	819	23		(Luo et al., 2020)
WN9-16			0.85	0.0652	0.0022	0.0931	0.0008	0.8441	0.0283	783	71	574	5	621	16		(Luo et al., 2020)
WN9-17			0.63	0.0673	0.0023	0.1201	0.0019	1.125	0.043	856	72	731	11	765	21		(Luo et al., 2020)
WN9-18			0.57	0.1605	0.0036	0.4686	0.0052	10.45	0.2363	2461	38	2477	23	2476	21		(Luo et al., 2020)
WN9-19			0.58	0.0637	0.0018	0.1403	0.0015	1.242	0.0343	731	29	847	8	820	16		(Luo et al., 2020)
WN9-20			0.63	0.0657	0.002	0.1393	0.0018	1.271	0.0396	794	63	841	10	833	18		(Luo et al., 2020)
WN9-21			0.83	0.0628	0.002	0.1267	0.0016	1.104	0.0351	702	69	769	9	755	17		(Luo et al., 2020)
WN9-22			0.78	0.0634	0.0016	0.1318	0.0013	1.164	0.0315	722	21	798	8	784	15		(Luo et al., 2020)
WN9-23			0.65	0.0636	0.0024	0.1299	0.0016	1.145	0.0425	729	77	787	9	775	20		(Luo et al., 2020)
WN9-24			0.84	0.0647	0.0032	0.1259	0.002	1.119	0.0533	765	104	764	11	762	26		(Luo et al., 2020)
WN9-25			1.13	0.0642	0.0029	0.1301	0.0019	1.148	0.0516	746	94	788	11	776	24		(Luo et al., 2020)
WN9-26			0.38	0.0688	0.0019	0.1568	0.002	1.499	0.0434	894	57	939	11	930	18		(Luo et al., 2020)
WN9-27			0.67	0.0643	0.0021	0.1361	0.0014	1.216	0.0392	752	67	823	8	808	18		(Luo et al., 2020)
WN9-28			1.84	0.0636	0.0029	0.1223	0.0016	1.075	0.0483	728	103	744	9	741	24		(Luo et al., 2020)
WN9-29			0.57	0.065	0.0019	0.1292	0.0016	1.163	0.0346	772	55	783	9	783	16		(Luo et al., 2020)
WN9-30			0.82	0.0659	0.0029	0.1333	0.0017	1.2	0.0489	803	92	806	10	801	23		(Luo et al., 2020)
WN9-31			0.67	0.063	0.0016	0.1357	0.0014	1.188	0.0318	709	56	820	8	795	15		(Luo et al., 2020)
WN9-32			0.68	0.066	0.0046	0.1252	0.0023	1.132	0.0701	806	146	760	13	769	33		(Luo et al., 2020)
WN9-33			0.67	0.0651	0.0039	0.1257	0.0017	1.137	0.0693	776	121	763	10	771	33		(Luo et al., 2020)
WN9-34			0.67	0.0656	0.0031	0.1237	0.0019	1.109	0.0495	794	100	752	11	758	24		(Luo et al., 2020)
WN9-35			0.67	0.0656	0.0021	0.1324	0.0016	1.207	0.0375	794	69	801	9	804	17		(Luo et al., 2020)
WN9-36			0.54	0.0666	0.0021	0.13	0.0012	1.207	0.0356	833	65	788	7	804	16		(Luo et al., 2020)
WN9-37			0.58	0.0662	0.002	0.1271	0.0014	1.168	0.0339	813	65	771	8	786	16		(Luo et al., 2020)
WN9-38			0.96	0.0682	0.003	0.1379	0.0018	1.298	0.052	876	89	833	10	845	23		(Luo et al., 2020)
WN9-39			1.01	0.0659	0.0054	0.123	0.0026	1.086	0.0815	806	174	748	15	747	40		(Luo et al., 2020)
WN9-40			0.76	0.0631	0.0023	0.1179	0.0015	1.025	0.036	709	78	719	9	716	18		(Luo et al., 2020)
WN9-41			1.73	0.0607	0.0019	0.1195	0.0015	1.008	0.0315	628	67	728	8	708	16		(Luo et al., 2020)
WN9-42			0.61	0.0637	0.0023	0.1307	0.0018	1.151	0.0404	731	78	792	10	778	19		(Luo et al., 2020)
WN9-43			1.23	0.0644	0.003	0.1331	0.0022	1.179	0.0531	754	98	805	12	791	25		(Luo et al., 2020)
WN9-44			0.39	0.1443	0.0029	0.4409	0.007	8.848	0.2275	2279	35	2355	31	2322	24		(Luo et al., 2020)
WN9-45			0.91	0.1508	0.0034	0.4401	0.0042	9.207	0.2234	2355	39	2351	19	2359	22		(Luo et al., 2020)
WN9-46			0.59	0.0623	0.0024	0.1148	0.0015	0.9855	0.038	685	77	701	9	696	19		(Luo et al., 2020)
WN9-47			0.89	0.066	0.0027	0.1399	0.002	1.271	0.0512	809	90	844	11	833	23		(Luo et al., 2020)
WN9-48			0.74	0.0598	0.004	0.0837	0.0012	0.6772	0.0463	594	144	518	7	525	28		(Luo et al., 2020)
WN9-49			0.8	0.0703	0.0039	0.1438	0.0022	1.382	0.0761	1000	119	866	12	881	33		(Luo et al., 2020)
WN9-50			0.59	0.0632	0.0027	0.1274	0.0016	1.112	0.0477	722	290	773	9	759	23		(Luo et al., 2020)
WN9-51			1.21	0.0571	0.002	0.0956	0.0011	0.7553	0.028	494	78	588	7	571	16		(Luo et al., 2020)
WN9-52			1.11	0.2349	0.0056	0.6151	0.0079	19.93	0.4792	3087	38	3090	32	3088	23		(Luo et al., 2020)
WN9-53			0.92	0.0706	0.0059	0.1259	0.0034	1.161	0.0887	946	171	765	19	782	42		(Luo et al., 2020)
WN9-54			0.91	0.0661	0.0018	0.1314	0.0017	1.197	0.0325	809	57	796	10	799	15		(Luo et al., 2020)
WN9-55			0.62	0.0643	0.0022	0.1335	0.0015	1.185	0.0393	754	70	808	9	793	18		(Luo et al., 2020)
WN9-56			0.81	0.0659	0.0032	0.1286	0.0022	1.157	0.0531	1200	102	780	12	780	25		(Luo et al., 2020)
WN9-57			0.59	0.0667	0.0018	0.1386	0.0017	1.273	0.0322	828	56	837	10	833	14		(Luo et al., 2020)
WN9-58			0.7	0.0668	0.003	0.1306	0.002	1.211	0.0575	831	88	791	11	806	26		(Luo et al., 2020)
WN9-59			0.7	0.0657	0.0018	0.1341	0.0019	1.22	0.0348	798	57	811	11	810	16		(Luo et al., 2020)
WN9-60			0.55	0.0674	0.0017	0.1349	0.0017	1.259	0.0329	852	53	816	10	828	15		(Luo et al., 2020)
WN9-61			1.35	0.1228	0.0025	0.3588	0.0039	6.097	0.1335	1998	37	1976	19	1990	19		(Luo et al., 2020)
WN9-62			0.63	0.0682	0.0019	0.1398	0.0019	1.31	0.0361	876	57	844	11	850	16		(Luo et al., 2020)
WN9-63			0.2	0.1558	0.0032	0.4358	0.0056	9.393	0.2037	2410	34	2332	25	2377	20		(Luo et al., 2020)
WN9-64			0.86	0.0642	0.0019	0.1304	0.0015	1.152	0.0345	746	63	790	9	778	16		(Luo et al., 2020)
WN9-65			0.67	0.0635	0.0015	0.1165	0.0013	1.022	0.026	724	50	711	7	715	13		(Luo et al., 2020)
WN9-66			0.65	0.0653	0.0022	0.1242	0.0016	1.109	0.0377	783	72	754	9	758	18		(Luo et al., 2020)
WN9-67			0.8	0.0664	0.003	0.1297	0.0018	1.183	0.054	820	99	786	10	793	25		(Luo et al., 2020)
WN9-68			0.65	0.0643	0.0019	0.1252	0.0013	1.119	0.0363	752	63	761	7	762	17		(Luo et al., 2020)
WN9-69			0.7	0.0664	0.0021	0.1343	0.0013	1.225	0.0364	820	67	813	8	812	17		(Luo et al., 2020)
WN9-70			0.38	0.0594	0.0027	0.11	0.0014	0.8932	0.0402	583	100	673	8	648	22		(Luo et al., 2020)
WN9-71			1	0.0652	0.0025	0.129	0.0017	1.157	0.0432	789	80	782	10	780	20		(Luo et al., 2020)
WN9-72			0.37	0.0598	0.0018	0.1074	0.0013	0.8892	0.0271	598	67	658	8	646	15		(Luo et al., 2020)
WN9-73			0.59	0.0663	0.0027	0.1387	0.0018	1.263	0.0477	815	84	837	10	829	21		(Luo et al., 2020)
WN9-74			1.01	0.0636	0.0015	0.13	0.0016	1.148	0.029	731	55	788	9	776	14		(Luo et al., 2020)
WN9-75			0.61	0.066	0.0018	0.1337	0.0016	1.219	0.0324	806	56	809	9	809	15		(Luo et al., 2020)
WN9-76			1.34	0.066	0.0061	0.1035	0.0021	0.8865	0.0698	806	194	635	13	644	38		(Luo et al., 2020)
WN9-77			0.89	0.067	0.0021	0.1269	0.0017	1.177	0.038	839	66	770	10	790	18		(Luo et al., 2020)
WN9-78			0.68	0.1223	0.0026	0.3536	0.0034	6.006	0.1322	1990	37	1952	16	1977	19		(Luo et al., 2020)
WN9-79			1.68	0.0663	0.0017	0.1384	0.0017	1.267	0.0332	815	58	835	10	831	15		(Luo et al., 2020)
WN9-80			1.24	0.066	0.0026	0.132	0.0016	1.2	0.0463	806	82	799	9	801	21		(Luo et al., 2020)
WN9-81			1.36	0.0624	0.0026	0.1126	0.0015	0.9678	0.0394	700	88	688	9	687	20		(Luo et al., 2020)
WN9-82			1	0.0661	0.0027	0.1453	0.002	1.331	0.0554	809	85	874	11	859	24		(Luo et al., 2020)
WN9-83			0.78	0.0676	0.0031	0.1358	0.0016	1.27	0.0566	857	91	821	9	832	25		(Luo et al., 2020)
WN9-84			1.05	0.0671	0.0042	0.1414	0.0025	1.289	0.0757	843	129	853	14	841	34		(Luo et al., 2020)
WN9-85			0.69	0.0617	0.0021	0.1188	0.0013	1.012	0.0325	665	77	724	7	710	16		(Luo et al., 2020)
WN9-86			0.64	0.0641	0.0025	0.1286	0.0014	1.132	0.0418	746	86	780	8	769	20		(Luo et al., 2020)
WN9-89			0.64	0.0657	0.0035	0.1254	0.0018	1.117	0.0642	798	111	761	10	762	31		(Luo et al., 2020)
WN9-90			0.41	0.0966	0.0038	0.2487	0.0036	3.27	0.1565	1559	74	1432	19	1474	37		(Luo et al., 2020)
WN9-91			1.2	0.147	0.0046	0.4113	0.0048	8.254	0.3202	2311	54	2221	22	2259	35		(Luo et al., 2020)
WN9-92			1	0.0635	0.0033	0.1179	0.0019	1.006	0.0527	724	111	718	11	707	27		(Luo et al., 2020)
WN9-93			1.23	0.0599	0.0017	0.0956	0.001	0.794	0.0222	598	59	588	6	593	13		(Luo et al., 2020)
WN9-94			0.84	0.0667	0.0039	0.1334	0.0028	1.234	0.0764	828	121	807	16	816	35		(Luo et al., 2020)
WN9-95			0.33	0.0707	0.0032	0.166	0.0027	1.607	0.0706	950	93	990	15	973	28		(Luo et al., 2020)
WN9-96			1.02	0.0642	0.0045	0.1194	0.0024	1.043	0.0643	746	146	727	14	725	32		(Luo et al., 2020)
WN9-97			0.6	0.0635	0.0019	0.1269	0.0013	1.121	0.033	728	63	770	7	763	16		(Luo et al., 2020)
WN9-98			1.08	0.0651	0.0018	0.1311	0.0021	1.183	0.0356	776	59	794	12	793	17		(Luo et al., 2020)
WN6 (lower Cambrian Kongmingdong Formation)
WN6-1			0.6	0.0694	0.0016	0.1566	0.0017	1.509	0.0375	922	52	938	9	934	15		(Luo et al., 2020)
WN6-2			0.55	0.0594	0.0015	0.1	0.001	0.8212	0.0206	589	54	614	6	609	12		(Luo et al., 2020)
WN6-3			1.09	0.0661	0.0023	0.135	0.0017	1.226	0.0396	809	68	816	10	813	18		(Luo et al., 2020)
WN6-4			0.69	0.0644	0.0019	0.128	0.0016	1.14	0.036	754	65	777	9	772	17		(Luo et al., 2020)
WN6-5			1.01	0.071	0.0019	0.1696	0.0022	1.66	0.0436	967	56	1010	12	993	17		(Luo et al., 2020)
WN6-6			0.75	0.0646	0.0024	0.1347	0.0017	1.198	0.0428	761	80	815	10	800	20		(Luo et al., 2020)
WN6-9			0.6	0.0671	0.0025	0.1354	0.0019	1.253	0.043	840	78	819	11	825	19		(Luo et al., 2020)
WN6-10			0.91	0.0675	0.0026	0.1347	0.0021	1.246	0.046	854	82	815	12	822	21		(Luo et al., 2020)
WN6-11			0.89	0.0681	0.0025	0.1354	0.0018	1.276	0.0482	872	76	819	10	835	22		(Luo et al., 2020)
WN6-12			0.67	0.0677	0.0018	0.1564	0.0021	1.462	0.0388	861	56	937	12	915	16		(Luo et al., 2020)
WN6-13			1.12	0.1496	0.0036	0.415	0.0049	8.611	0.2282	2343	41	2238	22	2298	24		(Luo et al., 2020)
WN6-15			1.03	0.0596	0.0027	0.128	0.0017	1.046	0.0458	587	98	777	10	727	23		(Luo et al., 2020)
WN6-16			0.82	0.0605	0.0023	0.1278	0.0018	1.063	0.0421	620	51	775	10	735	21		(Luo et al., 2020)
WN6-17			0.64	0.0648	0.0022	0.135	0.0018	1.211	0.0421	769	73	816	10	805	19		(Luo et al., 2020)
WN6-18			1.17	0.0568	0.0016	0.1004	0.0009	0.7907	0.0208	483	63	617	5	592	12		(Luo et al., 2020)
WN6-19			0.42	0.0692	0.0015	0.1562	0.0016	1.502	0.0328	903	43	936	9	931	13		(Luo et al., 2020)
WN6-20			0.78	0.152	0.0037	0.454	0.0056	9.575	0.237	2368	41	2413	25	2395	23		(Luo et al., 2020)
WN6-21			0.68	0.1649	0.003	0.4821	0.0054	11.02	0.2195	2506	32	2536	24	2525	19		(Luo et al., 2020)
WN6-22			1.12	0.0682	0.0035	0.1278	0.0023	1.184	0.0565	876	106	775	13	793	26		(Luo et al., 2020)
WN6-23			0.72	0.0666	0.0024	0.1278	0.0016	1.176	0.0416	828	75	775	9	789	19		(Luo et al., 2020)
WN6-24			0.92	0.0633	0.0041	0.1087	0.0021	0.9345	0.0575	717	136	665	12	670	30		(Luo et al., 2020)
WN6-25			0.9	0.0698	0.0029	0.1346	0.0021	1.296	0.0572	920	87	814	12	844	25		(Luo et al., 2020)
WN6-26			1.97	0.0754	0.0032	0.1355	0.002	1.376	0.0555	1080	87	819	11	879	24		(Luo et al., 2020)
WN6-27			0.8	0.0635	0.0016	0.128	0.0015	1.119	0.0276	724	52	776	9	763	13		(Luo et al., 2020)
WN6-28			0.33	0.0702	0.0015	0.1562	0.0021	1.516	0.0367	933	38	936	12	937	15		(Luo et al., 2020)
WN6-29			0.61	0.0701	0.003	0.1346	0.0023	1.296	0.0543	931	89	814	13	844	24		(Luo et al., 2020)
WN6-30			0.63	0.1637	0.0038	0.4784	0.0086	10.8	0.2943	2494	40	2520	37	2506	25		(Luo et al., 2020)
WN6-31			0.57	0.1605	0.0039	0.4761	0.0061	10.56	0.2757	2461	41	2510	27	2485	24		(Luo et al., 2020)
WN6-32			0.56	0.1202	0.0025	0.358	0.0048	5.932	0.1325	1958	36	1973	23	1966	20		(Luo et al., 2020)
WN6-33			0.74	0.0733	0.0077	0.1281	0.0031	1.215	0.1131	1033	213	777	18	807	52		(Luo et al., 2020)
WN6-34			0.98	0.0635	0.0025	0.1343	0.0017	1.174	0.0451	724	83	812	10	789	21		(Luo et al., 2020)
WN6-35			2.09	0.0643	0.0025	0.1346	0.0016	1.197	0.0462	754	49	814	9	799	21		(Luo et al., 2020)
WN6-36			1.26	0.0978	0.0021	0.2751	0.0035	3.735	0.0913	1583	45	1567	18	1579	20		(Luo et al., 2020)
WN6-37			0.71	0.1603	0.0037	0.4742	0.0053	10.54	0.2488	2458	39	2502	23	2483	22		(Luo et al., 2020)
WN6-38			1.06	0.0669	0.003	0.1276	0.002	1.174	0.0531	835	93	774	11	788	25		(Luo et al., 2020)
WN6-39			0.19	0.1237	0.003	0.3668	0.0041	6.286	0.1502	2010	44	2014	19	2017	21		(Luo et al., 2020)
WN6-40			0.76	0.069	0.0025	0.1557	0.0019	1.485	0.0519	898	76	933	10	924	21		(Luo et al., 2020)
WN6-41			0.16	0.0612	0.0013	0.1085	0.0012	0.918	0.0205	656	51	664	7	661	11		(Luo et al., 2020)
WN6-42			1.04	0.067	0.0023	0.1353	0.0018	1.253	0.0443	839	72	818	10	825	20		(Luo et al., 2020)
WN6-43			1.01	0.0715	0.0023	0.1562	0.0023	1.54	0.0487	972	65	936	13	947	20		(Luo et al., 2020)
WN6-44			1.26	0.0643	0.0025	0.1273	0.0018	1.124	0.0421	754	50	772	10	765	20		(Luo et al., 2020)
WN6-45			0.75	0.0644	0.0015	0.1351	0.0016	1.209	0.0296	755	247	817	9	805	14		(Luo et al., 2020)
WN6-46			0.9	0.0614	0.0036	0.1278	0.0018	1.084	0.0625	654	125	776	10	745	31		(Luo et al., 2020)
WN6-47			0.93	0.1255	0.0042	0.3629	0.0066	6.219	0.1955	2036	59	1996	31	2007	28		(Luo et al., 2020)
WN6-48			0.86	0.0727	0.002	0.1695	0.0022	1.708	0.0481	1006	57	1009	12	1012	18		(Luo et al., 2020)
WN6-49			1.16	0.0639	0.0024	0.1347	0.0018	1.183	0.0425	739	80	814	10	793	20		(Luo et al., 2020)
WN6-50			0.88	0.0578	0.0021	0.1085	0.0011	0.8665	0.0298	524	78	664	7	634	16		(Luo et al., 2020)
WN6-51			0.91	0.0691	0.0026	0.1348	0.0016	1.284	0.0477	902	78	815	9	839	21		(Luo et al., 2020)
WN6-52			1.07	0.068	0.0025	0.1351	0.0016	1.266	0.0437	878	75	817	9	831	20		(Luo et al., 2020)
WN6-53			0.77	0.17	0.0028	0.4768	0.006	11.25	0.2191	2558	28	2513	26	2544	18		(Luo et al., 2020)
WN6-54			0.48	0.1643	0.0035	0.4771	0.0063	10.87	0.2462	2502	36	2515	27	2512	21		(Luo et al., 2020)
WN6-55			0.96	0.0617	0.0031	0.1271	0.0018	1.085	0.0534	665	106	771	11	746	26		(Luo et al., 2020)
WN6-56			0.68	0.181	0.0034	0.5144	0.0063	12.93	0.2717	2663	32	2675	27	2674	20		(Luo et al., 2020)
WN6-57			1.72	0.0668	0.0029	0.1275	0.0017	1.18	0.0529	831	91	773	10	791	25		(Luo et al., 2020)
WN6-58			0.75	0.0613	0.0022	0.1276	0.0015	1.083	0.0383	650	76	774	9	745	19		(Luo et al., 2020)
WN6-59			0.41	0.1331	0.0023	0.3584	0.0031	6.616	0.1119	2139	30	1975	15	2061	15		(Luo et al., 2020)
WN6-60			0.76	0.0697	0.0044	0.1485	0.0025	1.426	0.0902	920	130	892	14	900	38		(Luo et al., 2020)
WN6-61			0.73	0.0695	0.0021	0.1281	0.0016	1.233	0.0371	922	62	777	9	816	17		(Luo et al., 2020)
WN6-62			0.7	0.0601	0.0013	0.088	0.0008	0.7354	0.0165	609	44	544	5	560	10		(Luo et al., 2020)
WN6-63			0.84	0.1696	0.003	0.4749	0.0041	11.18	0.1873	2554	30	2505	18	2538	16		(Luo et al., 2020)
WN6-64			0.67	0.0657	0.0029	0.1278	0.0016	1.162	0.053	794	94	776	9	783	25		(Luo et al., 2020)
WN6-65			0.98	0.0603	0.0012	0.0975	0.0012	0.8157	0.0185	617	43	600	7	606	10		(Luo et al., 2020)
WN6-66			0.8	0.0634	0.0041	0.1278	0.0025	1.135	0.0814	724	132	775	14	770	39		(Luo et al., 2020)
WN6-67			0.61	0.0652	0.0016	0.1278	0.0013	1.157	0.0295	789	51	775	8	781	14		(Luo et al., 2020)
WN6-68			1.01	0.0645	0.0023	0.135	0.002	1.197	0.0431	767	76	817	11	799	20		(Luo et al., 2020)
WN6-69			0.91	0.0674	0.003	0.1285	0.0019	1.197	0.0522	850	93	779	11	799	24		(Luo et al., 2020)
WN6-70			0.67	0.1631	0.0029	0.4762	0.0057	10.79	0.208	2487	30	2511	25	2505	18		(Luo et al., 2020)
WN6-71			1.2	0.0683	0.0034	0.128	0.0017	1.191	0.0545	880	102	777	10	797	25		(Luo et al., 2020)
WN6-72			0.87	0.0652	0.0022	0.1282	0.0014	1.156	0.0358	781	70	778	8	780	17		(Luo et al., 2020)
WN6-73			0.3	0.071	0.0016	0.135	0.0015	1.332	0.0303	967	51	816	9	860	13		(Luo et al., 2020)
WN6-74			0.73	0.064	0.0024	0.1279	0.0016	1.138	0.0437	743	82	776	9	772	21		(Luo et al., 2020)
WN6-75			0.67	0.1651	0.0027	0.4758	0.0036	10.93	0.1731	2509	28	2509	16	2518	15		(Luo et al., 2020)
WN6-76			0.67	0.0643	0.0063	0.1159	0.0029	1.028	0.1018	752	209	707	17	718	51		(Luo et al., 2020)
WN6-78			0.8	0.1627	0.0031	0.4756	0.0045	10.76	0.2072	2484	33	2508	20	2502	18		(Luo et al., 2020)
WN6-79			1.13	0.0704	0.0026	0.1281	0.0017	1.243	0.0445	940	74	777	10	820	20		(Luo et al., 2020)
WN6-80			0.71	0.0684	0.0016	0.1356	0.0013	1.287	0.028	883	46	820	7	840	12		(Luo et al., 2020)
WN6-81			0.79	0.0672	0.0019	0.1349	0.0014	1.252	0.0337	843	58	816	8	824	15		(Luo et al., 2020)
WN6-82			0.52	0.0659	0.002	0.1202	0.0013	1.098	0.0327	806	62	732	8	752	16		(Luo et al., 2020)
WN6-83			0.59	0.0645	0.0019	0.1355	0.0016	1.21	0.0364	767	62	819	9	805	17		(Luo et al., 2020)
WN6-84			0.71	0.0613	0.0029	0.1278	0.0018	1.073	0.0504	650	103	776	10	740	25		(Luo et al., 2020)
WN6-85			0.7	0.0658	0.0019	0.1347	0.0016	1.226	0.0359	1200	61	815	9	813	16		(Luo et al., 2020)
WN6-86			0.75	0.0638	0.003	0.1277	0.0017	1.116	0.0495	744	100	775	10	761	24		(Luo et al., 2020)
WN6-87			0.8	0.0705	0.0034	0.1352	0.0019	1.311	0.0626	943	99	818	11	851	28		(Luo et al., 2020)
WN6-88			0.39	0.137	0.0022	0.3993	0.0033	7.597	0.1242	2191	28	2166	15	2185	15		(Luo et al., 2020)
WN6-89			0.62	0.0685	0.0022	0.1351	0.0014	1.275	0.0377	883	65	817	8	835	17		(Luo et al., 2020)
WN6-90			0.75	0.0635	0.0041	0.1281	0.0024	1.125	0.0726	724	138	777	14	765	35		(Luo et al., 2020)
WN6-91			0.41	0.0711	0.0018	0.1679	0.0019	1.653	0.0413	961	50	1000	11	991	16		(Luo et al., 2020)
WN6-92			0.73	0.0741	0.002	0.1684	0.0021	1.726	0.044	1056	54	1003	12	1018	16		(Luo et al., 2020)
WN6-93			0.49	0.0698	0.0018	0.1677	0.0017	1.617	0.0399	922	47	1000	10	977	16		(Luo et al., 2020)
WN6-94			0.68	0.065	0.0021	0.1276	0.0016	1.145	0.0358	776	67	774	9	775	17		(Luo et al., 2020)
WN6-95			0.74	0.0733	0.0018	0.1674	0.0015	1.696	0.0402	1022	50	998	9	1007	15		(Luo et al., 2020)
WN6-96			0.19	0.0691	0.0031	0.148	0.0023	1.413	0.065	903	92	890	13	895	27		(Luo et al., 2020)
WN6-97			0.42	0.1445	0.0028	0.3963	0.0047	7.948	0.1793	2283	33	2152	22	2225	20		(Luo et al., 2020)
WN6-98			0.22	0.0744	0.0015	0.168	0.002	1.732	0.0375	1052	42	1001	11	1020	14		(Luo et al., 2020)
WN6-99			1.01	0.0659	0.0024	0.1279	0.0014	1.166	0.0414	1200	76	776	8	785	19		(Luo et al., 2020)
WN6-100			0.9	0.1651	0.0029	0.4753	0.0047	10.89	0.1908	2509	30	2507	21	2514	16		(Luo et al., 2020)
WN6-101			0.76	0.0686	0.0022	0.1285	0.0018	1.218	0.039	887	67	779	10	809	18		(Luo et al., 2020)
WN6-102			0.52	0.1792	0.003	0.5023	0.0053	12.52	0.2028	2656	28	2623	23	2644	15		(Luo et al., 2020)
WN6-103			1.02	0.0692	0.0022	0.1283	0.0015	1.235	0.0386	906	65	778	9	816	18		(Luo et al., 2020)
WN6-104			0.77	0.0712	0.003	0.1358	0.0021	1.345	0.0577	965	90	821	12	865	25		(Luo et al., 2020)
KM-3 (Cambrian Qiongzhusi Formation)
KM-3-1			0.45	0.0674	0.001	1.14	0.0188	0.1228	0.0016	849	32	773	9	746	9		(Wang et al., 2012)
KM-3-2			0.78	0.0659	0.0012	1.113	0.0217	0.1225	0.0017	802	39	760	10	745	10		(Wang et al., 2012)
KM-3-3			0.8	0.068	0.0011	1.348	0.0215	0.1438	0.0017	868	33	867	9	866	10		(Wang et al., 2012)
KM-3-5			1.13	0.0674	0.0014	1.183	0.0247	0.1273	0.0016	850	45	793	11	773	9		(Wang et al., 2012)
KM-3-7			0.47	0.0636	0.001	1.002	0.0158	0.1144	0.0014	728	33	705	8	698	8		(Wang et al., 2012)
KM-3-8			0.65	0.0666	0.0009	1.168	0.0168	0.1272	0.0015	826	30	786	8	772	8		(Wang et al., 2012)
KM-3-11			0.36	0.058	0.0013	0.6789	0.0153	0.0849	0.0013	529	49	526	9	525	7		(Wang et al., 2012)
KM-3-14			0.53	0.0684	0.0012	1.268	0.0221	0.1345	0.0016	881	37	832	10	813	9		(Wang et al., 2012)
KM-3-16			0.54	0.0718	0.0013	1.595	0.0294	0.1611	0.0022	981	36	968	11	963	12		(Wang et al., 2012)
KM-3-17			1.83	0.0668	0.0014	1.15	0.0247	0.1249	0.0018	831	45	777	12	759	10		(Wang et al., 2012)
KM-3-18			0.5	0.0653	0.0013	1.064	0.022	0.1182	0.0017	783	42	736	11	720	10		(Wang et al., 2012)
KM-3-20			0.71	0.141	0.0035	7.609	0.1949	0.3914	0.0064	2240	44	2186	23	2129	30		(Wang et al., 2012)
KM-3-21			0.99	0.0717	0.0015	1.233	0.0254	0.1247	0.0017	978	42	815	12	757	10		(Wang et al., 2012)
KM-3-22			0.94	0.0721	0.0015	1.27	0.0254	0.1278	0.0017	988	42	833	11	776	9		(Wang et al., 2012)
KM-3-23			1.35	0.0624	0.0011	0.8022	0.0146	0.0932	0.0012	689	40	598	8	574	7		(Wang et al., 2012)
KM-3-24			0.9	0.0695	0.0016	1.195	0.0274	0.1248	0.0018	913	48	798	13	758	10		(Wang et al., 2012)
KM-3-25			0.4	0.072	0.0011	1.446	0.0223	0.1458	0.0017	985	32	908	9	877	9		(Wang et al., 2012)
KM-3-27			0.73	0.0679	0.001	1.167	0.0179	0.1248	0.0014	864	33	785	8	758	8		(Wang et al., 2012)
KM-3-28			1.28	0.0725	0.0018	1.612	0.0398	0.1614	0.0025	999	50	975	15	964	14		(Wang et al., 2012)
KM-3-30			1.07	0.0724	0.0018	1.187	0.0281	0.119	0.0016	996	50	795	13	725	9		(Wang et al., 2012)
KM-3-32			0.63	0.0715	0.001	1.604	0.0228	0.1626	0.0018	973	29	972	9	971	10		(Wang et al., 2012)
KM-3-33			0.73	0.0725	0.001	1.573	0.021	0.1575	0.0017	999	28	960	8	943	10		(Wang et al., 2012)
KM-3-34			1.17	0.0674	0.0009	1.027	0.0146	0.1106	0.0013	850	30	718	7	676	7		(Wang et al., 2012)
KM-3-35			1	0.0673	0.0012	1.172	0.0215	0.1264	0.0016	846	39	788	10	767	9		(Wang et al., 2012)
KM-3-36			0.78	0.0664	0.0011	0.984	0.016	0.1075	0.0013	819	35	696	8	658	7		(Wang et al., 2012)
KM-3-37			1.1	0.0647	0.0013	1.122	0.0235	0.1257	0.0017	766	45	764	11	763	10		(Wang et al., 2012)
KM-3-38			0.96	0.0686	0.0011	1.177	0.0181	0.1245	0.0014	888	33	790	8	756	8		(Wang et al., 2012)
KM-3-39			0.88	0.0693	0.0014	1.355	0.0282	0.1418	0.0019	909	44	870	12	855	11		(Wang et al., 2012)
KM-3-40			1.12	0.1773	0.0027	11.6	0.1803	0.4744	0.0059	2628	25	2572	15	2503	26		(Wang et al., 2012)
KM-3-41			0.63	0.1097	0.0021	4.647	0.0927	0.3074	0.0044	1794	35	1758	17	1728	22		(Wang et al., 2012)
KM-3-42			0.65	0.064	0.0009	1.07	0.0156	0.1212	0.0014	743	31	739	8	737	8		(Wang et al., 2012)
KM-3-43			1.57	0.0659	0.0014	1.126	0.0243	0.1239	0.0018	804	45	766	12	753	10		(Wang et al., 2012)
KM-3-44			0.77	0.0646	0.0015	1.108	0.0257	0.1244	0.0019	762	49	757	12	756	11		(Wang et al., 2012)
KM-3-45			1.09	0.0681	0.0013	1.086	0.0205	0.1157	0.0014	872	41	747	10	706	8		(Wang et al., 2012)
KM-3-46			0.51	0.1914	0.0031	13.98	0.243	0.5299	0.0071	2754	27	2748	16	2741	30		(Wang et al., 2012)
KM-3-47			1.18	0.065	0.0012	1.131	0.0208	0.1262	0.0015	774	40	768	10	766	9		(Wang et al., 2012)
KM-3-48			0.43	0.1643	0.0049	10.27	0.3086	0.4537	0.0078	2500	52	2460	28	2411	35		(Wang et al., 2012)
KM-3-49			0.67	0.0672	0.0015	1.249	0.027	0.1349	0.0019	843	46	823	12	816	11		(Wang et al., 2012)
KM-3-50			1.34	0.0592	0.0011	0.7606	0.0141	0.0931	0.0011	576	42	574	8	574	7		(Wang et al., 2012)
KM-3-51			0.47	0.0663	0.0013	1.054	0.0195	0.1152	0.0014	817	40	731	10	703	8		(Wang et al., 2012)
KM-3-52			0.71	0.0662	0.0013	1.223	0.0244	0.134	0.0018	812	42	811	11	811	10		(Wang et al., 2012)
KM-3-53			1.02	0.0698	0.001	1.197	0.0184	0.1244	0.0015	924	31	799	8	756	8		(Wang et al., 2012)
KM-3-54			0.89	0.0672	0.0011	1.283	0.0215	0.1384	0.0017	845	35	838	10	835	10		(Wang et al., 2012)
KM-3-55			0.49	0.0684	0.0011	1.099	0.0178	0.1167	0.0014	879	33	753	9	711	8		(Wang et al., 2012)
KM-3-57			0.62	0.0686	0.0017	1.215	0.0299	0.1286	0.0019	885	52	807	14	780	11		(Wang et al., 2012)
KM-3-58			1.8	0.0747	0.0025	0.9154	0.0296	0.089	0.0014	1059	69	660	16	549	8		(Wang et al., 2012)
KM-3-59			0.79	0.0984	0.0024	3.831	0.0976	0.2823	0.0046	1595	47	1599	21	1603	23		(Wang et al., 2012)
KM-3-60			0.54	0.1269	0.0034	3.947	0.0948	0.2255	0.0026	2056	48	1623	19	1311	14		(Wang et al., 2012)
KM-3-61			1.66	0.0721	0.0011	1.185	0.0177	0.1193	0.0014	987	30	794	8	727	8		(Wang et al., 2012)
KM-3-62			0.95	0.0695	0.0012	1.239	0.0207	0.1293	0.0016	914	35	818	9	784	9		(Wang et al., 2012)
XVNB-2 (Cambrian Youfang Formation)
XVNB-2-1			0.4	0.1804	0.0003	12.79	0.0937	0.5141	0.0039	2657	2	2664	7	2674	17		(Chen et al., 2018)
XVNB-2-2			1.19	0.0607	0.0003	0.7781	0.0061	0.0931	0.0007	628	10	584	3	574	4		(Chen et al., 2018)
XVNB-2-3			1.16	0.0676	0.0006	1.114	0.0095	0.1195	0.0007	857	17	760	5	728	4		(Chen et al., 2018)
XVNB-2-4			1.15	0.0771	0.0007	1.484	0.0182	0.1395	0.0013	1124	18	924	7	842	7		(Chen et al., 2018)
XVNB-2-5			0.84	0.0716	0.0001	1.615	0.0107	0.1636	0.0011	976	8	976	4	977	6		(Chen et al., 2018)
XVNB-2-6			1.22	0.1636	0.0003	10.59	0.0979	0.4694	0.0044	2494	4	2488	9	2481	19		(Chen et al., 2018)
XVNB-2-7			0.17	0.0666	0.0002	1.239	0.0071	0.1349	0.0008	828	6	819	3	816	4		(Chen et al., 2018)
XVNB-2-8			0.18	0.0703	0.0001	1.541	0.0083	0.1589	0.0009	939	29	947	3	950	5		(Chen et al., 2018)
XVNB-2-9			1.69	0.0712	0.0002	1.608	0.0148	0.1638	0.0015	963	1	973	6	978	8		(Chen et al., 2018)
XVNB-2-10			0.27	0.0733	0.0003	1.735	0.0156	0.1714	0.0011	1033	7	1022	6	1020	6		(Chen et al., 2018)
XVNB-2-11			0.83	0.1631	0.0003	10.72	0.0968	0.4765	0.0043	2488	2	2499	8	2512	19		(Chen et al., 2018)
XVNB-2-12			0.51	0.162	0.0004	10.55	0.1127	0.4717	0.0044	2477	4	2484	10	2491	19		(Chen et al., 2018)
XVNB-2-13			0.91	0.0921	0.0002	3.27	0.0235	0.2575	0.0019	1469	4	1474	6	1477	10		(Chen et al., 2018)
XVNB-2-14			1.05	0.0671	0.0003	1.277	0.0091	0.1382	0.0009	839	9	836	4	834	5		(Chen et al., 2018)
XVNB-2-15			1.5	0.0591	0.0002	0.7416	0.0046	0.0911	0.0006	572	12	563	3	562	4		(Chen et al., 2018)
XVNB-2-16			1.62	0.0608	0.0003	0.8794	0.0092	0.105	0.0011	632	5	641	5	644	7		(Chen et al., 2018)
XVNB-2-17			0.23	0.1233	0.0002	6.341	0.0481	0.373	0.0028	2006	30	2024	7	2043	13		(Chen et al., 2018)
XVNB-2-18			1.19	0.0954	0.0002	3.687	0.0287	0.2804	0.0021	1544	4	1569	6	1593	11		(Chen et al., 2018)
XVNB-2-19			1.18	0.0664	0.0003	1.244	0.0113	0.1357	0.001	820	7	821	5	820	6		(Chen et al., 2018)
XVNB-2-20			1.15	0.0711	0.0001	1.611	0.0151	0.1643	0.0015	961	1	974	6	981	8		(Chen et al., 2018)
XVNB-2-21			0.68	0.166	0.0003	10.97	0.1198	0.4792	0.0053	2518	3	2520	10	2524	23		(Chen et al., 2018)
XVNB-2-22			0.83	0.0591	0.0003	0.6861	0.0052	0.0841	0.0005	572	11	530	3	521	3		(Chen et al., 2018)
XVNB-2-23			1.02	0.0756	0.0001	1.954	0.0157	0.1873	0.0015	1087	8	1100	5	1107	8		(Chen et al., 2018)
XVNB-2-24			1.31	0.0682	0.0003	1.33	0.0087	0.1415	0.0009	876	3	859	4	853	5		(Chen et al., 2018)
XVNB-2-25			1.43	0.0729	0.0002	1.729	0.0114	0.172	0.001	1011	6	1019	4	1023	6		(Chen et al., 2018)
XVNB-2-26			1.43	0.0892	0.0003	2.965	0.0187	0.2409	0.001	1409	3	1399	5	1391	5		(Chen et al., 2018)
XVNB-2-27			1.14	0.0677	0.0002	1.354	0.008	0.1451	0.0009	861	6	869	3	873	5		(Chen et al., 2018)
XVNB-2-28			1.11	0.0682	0.0002	1.395	0.0119	0.1485	0.0013	876	2	887	5	893	8		(Chen et al., 2018)
XVNB-2-29			0.17	0.113	0.0002	5.35	0.0476	0.3432	0.003	1850	1	1877	8	1902	14		(Chen et al., 2018)
XVNB-2-30			2.17	0.1655	0.0005	11.11	0.0981	0.4863	0.0038	2513	4	2532	8	2555	17		(Chen et al., 2018)
XVNB-2-31			0.78	0.0714	0.0002	1.601	0.0146	0.1627	0.0015	969	4	970	6	972	8		(Chen et al., 2018)
XVNB-2-32			0.72	0.1216	0.0006	6.144	0.1083	0.3638	0.005	1980	9	1997	15	2000	23		(Chen et al., 2018)
XVNB-2-33			0.7	0.0687	0.0003	1.436	0.0108	0.1516	0.001	900	7	904	5	910	6		(Chen et al., 2018)
XVNB-2-34			0.84	0.0758	0.0001	2.02	0.0173	0.1931	0.0016	1100	4	1122	6	1138	9		(Chen et al., 2018)
XVNB-2-35			1.24	0.0666	0.0008	1.22	0.0211	0.1325	0.0009	828	173	810	10	802	5		(Chen et al., 2018)
XVNB-2-36			0.59	0.0588	0.0002	0.7267	0.0057	0.0896	0.0006	567	6	555	3	553	4		(Chen et al., 2018)
XVNB-2-37			0.37	0.1026	0.0004	1.588	0.013	0.1121	0.0007	1673	7	965	5	685	4		(Chen et al., 2018)
XVNB-2-38			0.16	0.0718	0.0001	1.655	0.0143	0.167	0.0014	981	4	991	5	996	8		(Chen et al., 2018)
XVNB-2-39			1.12	0.0615	0.0002	0.9508	0.0092	0.1121	0.001	657	7	679	5	685	6		(Chen et al., 2018)
XVNB-2-40			0.95	0.1006	0.0004	4.031	0.0456	0.2899	0.0024	1635	7	1640	9	1641	12		(Chen et al., 2018)
XVNB-2-41			1.2	0.0686	0.0003	1.422	0.0116	0.1506	0.0013	887	8	898	5	904	8		(Chen et al., 2018)
XVNB-2-42			1.67	0.1227	0.0002	6.247	0.0517	0.3691	0.003	1996	3	2011	7	2025	14		(Chen et al., 2018)
XVNB-2-43			0.13	0.1188	0.0006	5.744	0.0982	0.3486	0.0042	1939	10	1938	15	1928	20		(Chen et al., 2018)
XVNB-2-44			0.63	0.1692	0.0003	11.17	0.0657	0.4788	0.0027	2550	3	2538	5	2522	12		(Chen et al., 2018)
XVNB-2-45			0.64	0.1514	0.0007	8.629	0.1018	0.4128	0.0033	2361	8	2300	11	2228	15		(Chen et al., 2018)
XVNB-2-46			0.6	0.0681	0.0002	1.355	0.0081	0.1445	0.0011	872	7	870	3	870	6		(Chen et al., 2018)
XVNB-2-47			0.82	0.067	0.0005	1.274	0.0094	0.1381	0.0008	839	10	834	4	834	5		(Chen et al., 2018)
XVNB-2-48			1.71	0.0673	0.0004	1.272	0.0099	0.1373	0.001	856	11	833	4	829	6		(Chen et al., 2018)
XVNB-2-49			1.44	0.0692	0.0002	1.478	0.0129	0.155	0.0013	903	6	921	5	929	7		(Chen et al., 2018)
XVNB-2-50			1.19	0.0722	0.0001	1.697	0.0156	0.1704	0.0015	992	4	1008	6	1014	9		(Chen et al., 2018)
XVNB-2-51			0.76	0.0693	0.0002	1.473	0.0114	0.154	0.0009	909	6	919	5	923	5		(Chen et al., 2018)
XVNB-2-52			0.65	0.0669	0.0003	1.266	0.0107	0.1373	0.001	835	5	831	5	830	6		(Chen et al., 2018)
XVNB-2-53			0.83	0.0761	0.0001	1.932	0.0135	0.184	0.0012	1098	4	1092	5	1089	6		(Chen et al., 2018)
XVNB-2-54			1.09	0.0684	0.0003	1.411	0.0106	0.1498	0.0011	880	7	894	4	900	6		(Chen et al., 2018)
XVNB-2-55			0.88	0.067	0.0003	1.211	0.0115	0.1311	0.0011	835	14	806	5	794	6		(Chen et al., 2018)
XVNB-2-56			0.37	0.0633	0.0001	1.118	0.0115	0.1281	0.0013	717	1	762	6	777	7		(Chen et al., 2018)
XVNB-2-57			0.77	0.0877	0.0005	2.856	0.0471	0.2348	0.003	1376	11	1371	12	1360	16		(Chen et al., 2018)
XVNB-2-58			0.6	0.0584	0.0002	0.7205	0.0098	0.0893	0.0011	546	6	551	6	551	6		(Chen et al., 2018)
XVNB-2-59			0.91	0.0957	0.0002	3.745	0.0581	0.2833	0.0041	1543	5	1581	12	1608	21		(Chen et al., 2018)
XVNB-2-60			1.17	0.0601	0.0002	0.7956	0.0057	0.0962	0.0008	606	7	594	3	592	5		(Chen et al., 2018)
XVNB-2-61			1.4	0.0715	0.0001	1.716	0.0149	0.1741	0.0015	972	4	1014	6	1035	8		(Chen et al., 2018)
XVNB-2-62			0.94	0.1533	0.0003	8.914	0.0397	0.4216	0.0017	2383	3	2329	4	2268	8		(Chen et al., 2018)
XVNB-2-63			1.13	0.1034	0.0006	1.514	0.0152	0.1059	0.0006	1687	11	936	6	649	3		(Chen et al., 2018)
XVNB-2-64			1.48	0.0794	0.0001	2.252	0.0193	0.2056	0.0017	1183	1	1197	6	1206	9		(Chen et al., 2018)
XVNB-2-65			1.29	0.0611	0.0003	0.8083	0.0051	0.0959	0.0003	643	11	602	3	591	2		(Chen et al., 2018)
XVNB-2-66			0.79	0.0589	0.0002	0.7167	0.0048	0.0884	0.0006	561	7	549	3	546	4		(Chen et al., 2018)
XVNB-2-67			0.46	0.0585	0.0001	0.742	0.0085	0.092	0.0011	546	4	564	5	568	6		(Chen et al., 2018)
XVNB-2-68			1.11	0.0654	0.0001	1.137	0.0065	0.1261	0.0007	787	4	771	3	766	4		(Chen et al., 2018)
XVNB-2-69			2.06	0.0685	0.0002	1.396	0.0065	0.1479	0.0005	883	6	887	3	889	3		(Chen et al., 2018)
XVNB-2-70			1.45	0.0709	0.0004	1.567	0.0097	0.1603	0.0009	954	13	957	4	959	5		(Chen et al., 2018)
XVNB-2-71			0.68	0.0653	0.0003	0.9539	0.0119	0.1057	0.001	783	9	680	6	648	6		(Chen et al., 2018)
XVNB-2-72			1.04	0.0678	0.0002	1.332	0.0094	0.1428	0.0012	863	10	860	4	860	7		(Chen et al., 2018)
XVNB-2-73			1.13	0.0961	0.0002	3.656	0.031	0.276	0.0023	1550	4	1562	7	1571	12		(Chen et al., 2018)
XVNB-2-74			1.7	0.068	0.0002	1.299	0.0074	0.1386	0.0009	878	7	845	3	837	5		(Chen et al., 2018)
XVNB-2-75			1.19	0.0592	0.0002	0.7335	0.0061	0.0899	0.0008	576	7	559	4	555	4		(Chen et al., 2018)
XVNB-2-76			1.03	0.0661	0.0002	1.259	0.0094	0.1381	0.001	809	192	827	4	834	6		(Chen et al., 2018)
XVNB-2-77			1.05	0.0639	0.0004	1.002	0.012	0.1136	0.001	739	13	705	6	694	6		(Chen et al., 2018)
XVNB-2-78			0.84	0.166	0.0003	10.99	0.0955	0.4802	0.0043	2518	3	2522	8	2528	19		(Chen et al., 2018)
XVNB-2-79			1.32	0.2043	0.0052	3.667	0.15	0.1293	0.0015	2861	41	1564	33	784	8		(Chen et al., 2018)
XVNB-2-80			2.03	0.0738	0.0001	1.791	0.0125	0.176	0.0012	1035	4	1042	5	1045	7		(Chen et al., 2018)
XVNB-2-81			1.57	0.0596	0.0003	0.7804	0.0047	0.0952	0.0007	587	11	586	3	586	4		(Chen et al., 2018)
XVNB-2-82			1.23	0.0675	0.0002	1.276	0.0057	0.137	0.0004	854	6	835	3	828	2		(Chen et al., 2018)
XVNB-2-83			0.68	0.0676	0.0002	1.36	0.0134	0.1459	0.0014	857	5	872	6	878	8		(Chen et al., 2018)
XVNB-2-84			0.85	0.0657	0.0001	1.216	0.0095	0.1343	0.001	798	3	808	4	812	6		(Chen et al., 2018)
XVNB-2-85			1.3	0.1627	0.0003	10.62	0.086	0.4733	0.0038	2484	2	2491	8	2498	17		(Chen et al., 2018)
XVNB-2-86			1.96	0.0608	0.0003	0.8573	0.0069	0.1022	0.0007	632	5	629	4	627	4		(Chen et al., 2018)
XVNB-2-87			1.69	0.0708	0.0001	1.557	0.0125	0.1596	0.0013	950	4	953	5	955	7		(Chen et al., 2018)
XVNB-2-88			0.48	0.0629	0.0001	1.045	0.0097	0.1204	0.0011	706	10	727	5	733	6		(Chen et al., 2018)
XVNB-2-89			0.82	0.0732	0.0006	1.753	0.0201	0.1734	0.0013	1020	15	1028	7	1031	7		(Chen et al., 2018)
XVNB-2-90			0.59	0.0726	0.0002	1.694	0.0089	0.1693	0.0008	1011	7	1006	3	1008	5		(Chen et al., 2018)
XVNB-3 (Cambrian Youfang Formation)
XVNB-3-1			0.56	0.0578	0.0001	0.6385	0.0046	0.0801	0.0006	524	6	501	3	496	3		(Chen et al., 2018)
XVNB-3-2			1.45	0.0653	0.0001	1.205	0.0103	0.1337	0.0011	785	1	803	5	809	6		(Chen et al., 2018)
XVNB-3-3			0.53	0.059	0.0002	0.7234	0.0083	0.0888	0.0009	569	7	553	5	548	5		(Chen et al., 2018)
XVNB-3-4			1.28	0.0702	0.0003	0.949	0.008	0.0981	0.0007	1000	8	678	4	603	4		(Chen et al., 2018)
XVNB-3-5			1.42	0.1084	0.0002	4.847	0.0433	0.3241	0.0028	1773	2	1793	8	1810	14		(Chen et al., 2018)
XVNB-3-6			0.85	0.0756	0.0003	1.911	0.0148	0.1832	0.0011	1087	8	1085	5	1084	6		(Chen et al., 2018)
XVNB-3-7			1.18	0.061	0.0002	0.8665	0.0067	0.1029	0.0007	639	10	634	4	631	4		(Chen et al., 2018)
XVNB-3-8			0.68	0.0741	0.0003	1.767	0.016	0.1735	0.002	1044	7	1033	6	1031	11		(Chen et al., 2018)
XVNB-3-9			0.92	0.0624	0.0003	0.8114	0.0064	0.0942	0.0004	689	13	603	4	580	2		(Chen et al., 2018)
XVNB-3-10			2.73	0.0671	0.0002	1.319	0.0117	0.1425	0.0013	843	7	854	5	859	7		(Chen et al., 2018)
XVNB-3-11			0.6	0.0726	0.0003	1.696	0.0095	0.1697	0.0011	1011	9	1007	4	1011	6		(Chen et al., 2018)
XVNB-3-12			3.56	0.0658	0.0002	1.177	0.0084	0.1297	0.0009	1200	7	790	4	786	5		(Chen et al., 2018)
XVNB-3-13			1.19	0.0691	0.0005	1.4	0.0106	0.1469	0.0006	902	14	889	4	883	3		(Chen et al., 2018)
XVNB-3-14			3.14	0.0614	0.0003	0.8981	0.0073	0.1061	0.0008	654	5	651	4	650	5		(Chen et al., 2018)
XVNB-3-15			1.01	0.0741	0.0002	1.825	0.0114	0.1787	0.0012	1044	6	1055	4	1060	7		(Chen et al., 2018)
XVNB-3-16			0.61	0.0804	0.0009	1.929	0.033	0.1739	0.0023	1207	22	1091	11	1034	12		(Chen et al., 2018)
XVNB-3-17			0.35	0.067	0.001	0.6735	0.0151	0.0729	0.0013	839	36	523	9	454	8		(Chen et al., 2018)
XVNB-3-18			0.29	0.0792	0.0013	2.139	0.0531	0.1957	0.0037	1177	34	1161	17	1152	20		(Chen et al., 2018)
XVNB-3-19			1.36	0.2488	0.005	21.69	0.6582	0.6323	0.0151	3177	31	3170	29	3159	60		(Chen et al., 2018)
XVNB-3-20			1.07	0.0723	0.0018	1.481	0.0508	0.1485	0.0038	994	48	923	21	893	21		(Chen et al., 2018)
XVNB-3-21			1.34	0.0923	0.0028	3.088	0.1334	0.2421	0.0073	1476	57	1430	33	1398	38		(Chen et al., 2018)
XVNB-3-22			1.07	0.0609	0.0018	0.8516	0.0361	0.1017	0.0033	635	65	626	20	624	19		(Chen et al., 2018)
XVNB-3-23			1.65	0.0742	0.0004	1.795	0.0181	0.1759	0.0019	1056	10	1044	7	1045	10		(Chen et al., 2018)
XVNB-3-24			0.84	0.0628	0.0005	0.741	0.0088	0.0855	0.0005	702	18	563	5	529	3		(Chen et al., 2018)
XVNB-3-25			1.55	0.0641	0.0002	1.069	0.0086	0.121	0.001	743	6	738	4	736	6		(Chen et al., 2018)
XVNB-3-26			0.18	0.1464	0.0005	1.439	0.0281	0.0712	0.0013	2306	6	905	12	444	8		(Chen et al., 2018)
XVNB-3-27			0.97	0.111	0.0002	5.051	0.0408	0.33	0.0027	1817	3	1828	7	1838	13		(Chen et al., 2018)
XVNB-3-28			0.47	0.0714	0.0004	1.577	0.016	0.1602	0.0013	969	11	961	6	958	7		(Chen et al., 2018)
XVNB-3-29			1.05	0.0679	0.0003	1.376	0.0092	0.1472	0.0012	878	8	879	4	885	7		(Chen et al., 2018)
XVNB-3-30			0.42	0.1564	0.0005	9.234	0.0734	0.4279	0.0025	2417	4	2361	7	2296	11		(Chen et al., 2018)
XVNB-3-31			0.79	0.0763	0.0007	1.744	0.0258	0.1655	0.0012	1103	18	1025	10	987	6		(Chen et al., 2018)
XVNB-3-32			0.89	0.0591	0.0002	0.7238	0.0047	0.0888	0.0006	572	12	553	3	548	4		(Chen et al., 2018)
XVNB-3-33			0.53	0.0733	0.0002	1.707	0.0097	0.1689	0.0009	1033	6	1011	4	1006	5		(Chen et al., 2018)
XVNB-3-34			0.66	0.1739	0.0003	10.51	0.0347	0.4384	0.0013	2595	2	2481	3	2343	6		(Chen et al., 2018)
XVNB-3-35			0.5	0.0726	0.0002	1.578	0.0051	0.1576	0.0004	1011	4	961	2	944	2		(Chen et al., 2018)
XVNB-3-36			0.61	0.0624	0.0002	0.8819	0.0089	0.1025	0.001	687	7	642	5	629	6		(Chen et al., 2018)
XVNB-3-37			0.55	0.0831	0.0002	2.49	0.0195	0.2173	0.0017	1272	1	1269	6	1267	9		(Chen et al., 2018)
XVNB-3-38			0.78	0.1208	0.0002	5.054	0.0251	0.3033	0.0014	1968	4	1828	4	1708	7		(Chen et al., 2018)
XVNB-3-39			0.04	0.0622	0.0003	0.9519	0.0047	0.1111	0.0005	680	17	679	2	679	3		(Chen et al., 2018)
XVNB-3-40			1.11	0.0724	0.0002	1.432	0.0129	0.1433	0.001	998	7	902	5	863	5		(Chen et al., 2018)
XVNB-3-41			0.78	0.263	0.0005	23.79	0.2225	0.6558	0.0059	3265	3	3260	9	3251	23		(Chen et al., 2018)
XVNB-3-42			0.66	0.0593	0.0002	0.7702	0.0078	0.0943	0.0009	576	7	580	4	581	5		(Chen et al., 2018)
XVNB-3-43			0.6	0.0614	0.0003	0.8251	0.0061	0.0975	0.0005	654	13	611	3	600	3		(Chen et al., 2018)
XVNB-3-44			0.47	0.0664	0.0002	1.031	0.0037	0.1125	0.0003	820	6	719	2	687	2		(Chen et al., 2018)
XVNB-3-45			0.4	0.0715	0.0001	1.632	0.0144	0.1656	0.0015	972	4	983	6	988	8		(Chen et al., 2018)
XVNB-3-46			1.25	0.0631	0.0002	0.8285	0.0064	0.0951	0.0006	722	7	613	4	586	3		(Chen et al., 2018)
XVNB-3-47			1.17	0.1525	0.0057	2.708	0.145	0.1253	0.0017	2376	65	1331	40	761	10		(Chen et al., 2018)
XVNB-3-48			1.75	0.0655	0.0001	1.193	0.0074	0.1322	0.0008	791	4	797	3	800	5		(Chen et al., 2018)
XVNB-3-49			1.16	0.1667	0.0003	9.097	0.0325	0.3956	0.0013	2525	2	2348	3	2149	6		(Chen et al., 2018)
XVNB-3-50			0.17	0.1167	0.0002	5.533	0.0312	0.3439	0.0019	1906	3	1906	5	1905	9		(Chen et al., 2018)
XVNB-3-51			0.79	0.0688	0.0002	1.384	0.0091	0.1459	0.0011	894	5	882	4	878	6		(Chen et al., 2018)
XVNB-3-52			0.45	0.0689	0.0003	1.393	0.011	0.1465	0.001	898	9	886	5	881	5		(Chen et al., 2018)
XVNB-3-53			0.84	0.0621	0.0002	0.9289	0.0086	0.1086	0.0011	676	6	667	5	665	6		(Chen et al., 2018)
XVNB-3-54			0.72	0.0672	0.0003	1.307	0.0158	0.1408	0.0014	843	7	849	7	849	8		(Chen et al., 2018)
XVNB-3-55			0.62	0.0727	0.0002	1.43	0.006	0.1425	0.0005	1007	1	902	3	859	3		(Chen et al., 2018)
XVNB-3-56			1.95	0.1604	0.0003	8.387	0.0363	0.3792	0.0015	2461	3	2274	4	2072	7		(Chen et al., 2018)
XVNB-3-57			0.62	0.0693	0.0003	1.174	0.0059	0.1228	0.0005	909	7	789	3	747	3		(Chen et al., 2018)
XVNB-3-58			0.54	0.1211	0.0004	4.806	0.1141	0.2879	0.007	1973	10	1786	20	1631	35		(Chen et al., 2018)
XVNB-3-59			1.25	0.0758	0.0002	0.733	0.0054	0.0702	0.0005	1089	6	558	3	437	3		(Chen et al., 2018)
XVNB-3-60			0.27	0.0682	0.0002	1.379	0.0059	0.1465	0.0006	876	4	880	3	881	4		(Chen et al., 2018)
XVNB-3-61			0.43	0.0624	0.0002	0.7778	0.0053	0.0904	0.0006	687	10	584	3	558	4		(Chen et al., 2018)
XVNB-3-62			0.59	0.0665	0.0002	0.9728	0.0064	0.1061	0.0006	822	6	690	3	650	3		(Chen et al., 2018)
XVNB-3-63			0.85	0.0724	0.0004	1.022	0.0121	0.1023	0.0009	998	9	715	6	628	5		(Chen et al., 2018)
XVNB-3-64			0.68	0.0757	0.0002	1.879	0.0099	0.1799	0.0007	1087	6	1074	3	1067	4		(Chen et al., 2018)
XVNB-3-65			0.93	0.1608	0.0004	6.389	0.0558	0.288	0.0022	2465	4	2031	8	1632	11		(Chen et al., 2018)
XVNB-3-66			0.97	0.0671	0.0002	1.132	0.005	0.1224	0.0004	839	10	769	2	744	2		(Chen et al., 2018)
XVNB-3-67			0.31	0.0671	0.0003	0.7877	0.0061	0.0851	0.0005	839	9	590	3	527	3		(Chen et al., 2018)
XVNB-3-68			0.5	0.0649	0.0003	0.7504	0.0066	0.0837	0.0004	772	14	568	4	518	3		(Chen et al., 2018)

## Sheet: SE Yangtze Cry to Edi
U-Pb ages of detrital zircons from Cryogenian to Ediacaran siliciclastic rocks from the southeastern margin of the Yangtze Block
				Ratio						Age
Sample	Th (ppm)	U (ppm)	Th/U	207Pb/206Pb	1σ	207Pb/235U	1σ	206Pb/238U	1σ	207Pb/206Pb	1σ	207Pb/235U	1σ	206Pb/238U	1σ		References
12gys-3 (Cryogenian Mukeng Formation), 29°59′44.2″, 118°02′39.4″
12gys-3-1	183	126	1.46	0.06659	0.00194	1.25577	0.0374	0.13681	0.0024	825	62	826	17	827	14		(Cui et al., 2015)
12gys-3-2	135	148	0.91	0.06727	0.00177	1.30248	0.03522	0.14046	0.00234	846	56	847	16	847	13		(Cui et al., 2015)
12gys-3-3	4	6	0.64	0.16417	0.0615	0.61451	0.2219	0.02715	0.00276	2499	860	486	140	173	17		(Cui et al., 2015)
12gys-3-4	401	214	1.87	0.06776	0.00188	1.33427	0.03802	0.1429	0.0025	861	59	861	17	861	14		(Cui et al., 2015)
12gys-3-5	71	44	1.6	0.06663	0.00438	1.25711	0.08018	0.13687	0.00328	826	141	827	36	827	19		(Cui et al., 2015)
12gys-3-6	96	345	0.28	0.11097	0.00866	3.96611	0.30129	0.25921	0.0046	1815	146	1627	62	1486	24		(Cui et al., 2015)
12gys-3-7	159	345	0.46	0.08896	0.00239	2.97451	0.08328	0.24267	0.00445	1403	53	1401	21	1401	23		(Cui et al., 2015)
12gys-3-8	7	19	0.4	0.07009	0.00618	1.5003	0.12862	0.15531	0.00441	931	187	931	52	931	25		(Cui et al., 2015)
12gys-3-9	196	182	1.08	0.06802	0.0018	1.35219	0.03719	0.14418	0.00248	869	56	869	16	868	14		(Cui et al., 2015)
12gys-3-10	323	243	1.33	0.08871	0.00431	1.59691	0.07499	0.13047	0.00284	1398	96	969	29	791	16		(Cui et al., 2015)
12gys-3-11	109	134	0.82	0.06736	0.00262	1.30296	0.05071	0.14036	0.00283	849	83	847	22	847	16		(Cui et al., 2015)
12gys-3-12	38	28	1.36	0.06702	0.00595	1.28628	0.11071	0.13917	0.00409	838	192	840	49	840	23		(Cui et al., 2015)
12gys-3-13	267	129	2.07	0.06693	0.00183	1.27597	0.03595	0.13827	0.00239	836	58	835	16	835	14		(Cui et al., 2015)
12gys-3-14	73	56	1.31	0.06835	0.00222	1.37089	0.04511	0.14544	0.00255	879	69	877	19	875	14		(Cui et al., 2015)
12gys-3-15	255	182	1.4	0.06705	0.00132	1.28788	0.02756	0.1393	0.00214	839	42	840	12	841	12		(Cui et al., 2015)
12gys-3-16	10	146	0.07	0.12246	0.00231	6.11399	0.12367	0.36214	0.00542	1992	34	1992	18	1992	26		(Cui et al., 2015)
12gys-3-17	61	5	12.17	0.1715	0.08456	1.10113	0.51785	0.04657	0.00704	2572	1270	754	250	293	43		(Cui et al., 2015)
12gys-3-18	290	238	1.22	0.0992	0.00186	3.88132	0.07913	0.28374	0.00432	1609	36	1610	16	1610	22		(Cui et al., 2015)
12gys-3-19	187	317	0.59	0.06823	0.00132	1.36318	0.02883	0.14489	0.00227	876	41	873	12	872	13		(Cui et al., 2015)
12gys-3-20	338	579	0.58	0.06993	0.00173	1.49045	0.03905	0.15459	0.00274	926	52	926	16	927	15		(Cui et al., 2015)
12gys-3-21	116	121	0.96	0.06677	0.00236	1.26046	0.04433	0.13692	0.00259	831	75	828	20	827	15		(Cui et al., 2015)
12gys-3-22	304	743	0.41	0.07664	0.00198	1.4395	0.03792	0.13622	0.00214	1112	53	906	16	823	12		(Cui et al., 2015)
12gys-3-23	639	481	1.33	0.12238	0.00212	3.9168	0.07622	0.23213	0.00357	1991	32	1617	16	1346	19		(Cui et al., 2015)
12gys-3-24	752	245	3.07	0.06599	0.00172	1.21045	0.03234	0.13304	0.00221	806	56	805	15	805	13		(Cui et al., 2015)
12gys-3-25	105	172	0.61	0.06796	0.00177	1.35017	0.03644	0.1441	0.00239	867	55	868	16	868	13		(Cui et al., 2015)
12gys-3-26	279	229	1.22	0.10528	0.00169	4.43551	0.0825	0.3056	0.00471	1719	30	1719	15	1719	23		(Cui et al., 2015)
12gys-3-27	48	50	0.96	0.06695	0.00284	1.28041	0.05408	0.1387	0.00261	836	91	837	24	837	15		(Cui et al., 2015)
12gys-3-28	1887	2000	0.94	0.09197	0.00149	1.22221	0.02302	0.09639	0.00149	1467	31	811	11	593	9		(Cui et al., 2015)
12gys-3-29	255	168	1.52	0.06722	0.0031	1.28486	0.05781	0.13861	0.00292	845	98	839	26	837	17		(Cui et al., 2015)
12gys-3-30	69	42	1.64	0.06748	0.00345	1.31665	0.06634	0.14152	0.00292	853	109	853	29	853	16		(Cui et al., 2015)
12gys-3-31	502	306	1.64	0.06646	0.00188	1.24791	0.03555	0.13617	0.00221	821	60	822	16	823	13		(Cui et al., 2015)
12gys-3-32	28	16	1.73	0.06742	0.00584	1.27367	0.10871	0.13703	0.00334	851	186	834	49	828	19		(Cui et al., 2015)
12gys-3-33	334	279	1.2	0.06664	0.00139	1.25637	0.02813	0.13673	0.00212	827	45	826	13	826	12		(Cui et al., 2015)
12gys-3-34	118	126	0.94	0.06797	0.00184	1.34901	0.03768	0.14396	0.00246	868	57	867	16	867	14		(Cui et al., 2015)
12gys-3-35	363	384	0.94	0.06777	0.00167	1.33267	0.03459	0.14264	0.00241	862	52	860	15	860	14		(Cui et al., 2015)
12gys-3-36	69	64	1.08	0.06722	0.0032	1.29616	0.06088	0.13985	0.00294	845	102	844	27	844	17		(Cui et al., 2015)
12gys-3-37	104	80	1.3	0.06633	0.00312	1.23029	0.05701	0.1345	0.00287	817	101	814	26	813	16		(Cui et al., 2015)
12gys-3-38	144	153	0.94	0.06754	0.00246	1.31957	0.04804	0.14172	0.0027	854	77	854	21	854	15		(Cui et al., 2015)
12gys-3-39	51	52	0.99	0.07028	0.00387	1.51278	0.08052	0.15619	0.00353	937	116	936	33	936	20		(Cui et al., 2015)
12gys-3-40	99	110	0.9	0.09317	0.0021	3.34398	0.07855	0.2603	0.00418	1491	44	1491	18	1491	21		(Cui et al., 2015)
12gys-3-41	1630	494	3.3	0.06825	0.00229	1.31549	0.04404	0.13977	0.00253	876	71	853	19	843	14		(Cui et al., 2015)
12gys-3-42	185	155	1.2	0.07298	0.00278	1.70743	0.06424	0.16969	0.00326	1013	79	1011	24	1010	18		(Cui et al., 2015)
12gys-3-43	76	55	1.39	0.06765	0.00271	1.32656	0.0525	0.14224	0.00263	858	85	857	23	857	15		(Cui et al., 2015)
12gys-3-44	195	133	1.46	0.06717	0.00222	1.29322	0.04265	0.13965	0.00251	843	70	843	19	843	14		(Cui et al., 2015)
12gys-3-45	209	238	0.88	0.10076	0.00312	3.62848	0.11028	0.26117	0.00419	1638	59	1556	24	1496	21		(Cui et al., 2015)
12gys-3-46	304	301	1.01	0.06705	0.00173	1.29264	0.03387	0.13984	0.00224	839	55	842	15	844	13		(Cui et al., 2015)
12gys-3-47	132	135	0.98	0.07094	0.00207	1.5647	0.04596	0.15998	0.00269	956	61	956	18	957	15		(Cui et al., 2015)
12gys-3-48	400	627	0.64	0.06648	0.00156	1.24428	0.03018	0.13576	0.00212	822	50	821	14	821	12		(Cui et al., 2015)
12gys-3-49	798	736	1.08	0.06756	0.00178	1.18524	0.0324	0.12721	0.00213	855	56	794	15	772	12		(Cui et al., 2015)
12gys-3-50	177	236	0.75	0.1142	0.00196	5.29454	0.10111	0.33627	0.00506	1867	32	1868	16	1869	24		(Cui et al., 2015)
12gys-3-51	889	380	2.34	0.06847	0.00166	1.38443	0.0348	0.14676	0.00238	883	51	882	15	883	13		(Cui et al., 2015)
12gys-3-52	71	108	0.65	0.07267	0.00173	1.70343	0.04201	0.17002	0.00269	1005	49	1010	16	1012	15		(Cui et al., 2015)
12gys-3-53	744	1368	0.54	0.06955	0.00193	1.2743	0.0365	0.13283	0.00225	915	58	834	16	804	13		(Cui et al., 2015)
12gys-3-54	113	112	1	0.18019	0.00285	12.6597	0.22865	0.50957	0.00764	2655	27	2655	17	2655	33		(Cui et al., 2015)
12gys-3-55	415	261	1.59	0.06656	0.00252	1.25007	0.04732	0.13628	0.0028	824	81	823	21	824	16		(Cui et al., 2015)
12gys-3-56	54	62	0.87	0.0789	0.00757	1.33934	0.12296	0.1232	0.00451	1170	197	863	53	749	26		(Cui et al., 2015)
12gys-3-57	296	209	1.42	0.06894	0.00255	1.41405	0.05193	0.1488	0.00281	897	78	895	22	894	16		(Cui et al., 2015)
12gys-3-58	839	328	2.56	0.06811	0.00226	1.35738	0.04452	0.14475	0.00286	872	70	871	19	871	16		(Cui et al., 2015)
12gys-3-59	143	37	3.81	0.06619	0.00307	1.22782	0.05642	0.13453	0.00256	812	99	813	26	814	15		(Cui et al., 2015)
12gys-3-60	406	286	1.42	0.06918	0.0015	1.43034	0.03302	0.14997	0.00236	904	46	902	14	901	13		(Cui et al., 2015)
12gys-6 (Cryogenian Xiuning Formation), 29°56′50.2″, 118°05′39.5″
12gys-6-1	251	165	1.53	0.06544	0.00143	1.17258	0.02691	0.12996	0.00198	789	47	788	13	788	11		(Cui et al., 2015)
12gys-6-2	300	93	3.22	0.06631	0.00229	1.23211	0.04263	0.13475	0.00243	816	74	815	19	815	14		(Cui et al., 2015)
12gys-6-3	86	102	0.85	0.16377	0.00257	10.6736	0.19062	0.4727	0.00704	2495	27	2495	17	2495	31		(Cui et al., 2015)
12gys-6-4	304	123	2.46	0.06711	0.00409	1.29045	0.07573	0.13946	0.00345	841	130	841	34	842	20		(Cui et al., 2015)
12gys-6-5	1514	578	2.62	0.15223	0.00225	5.79817	0.1002	0.27623	0.00404	2371	26	1946	15	1572	20		(Cui et al., 2015)
12gys-6-6	558	721	0.77	0.11636	0.01279	1.87518	0.20248	0.11688	0.00242	1901	206	1072	72	713	14		(Cui et al., 2015)
12gys-6-7	341	553	0.62	0.15228	0.00241	6.25484	0.11327	0.29789	0.00439	2372	28	2012	16	1681	22		(Cui et al., 2015)
12gys-6-8	251	152	1.65	0.1523	0.00308	2.95126	0.06362	0.14053	0.00225	2372	35	1395	16	848	13		(Cui et al., 2015)
12gys-6-9	235	119	1.98	0.12234	0.00333	6.10524	0.16883	0.362	0.00632	1991	50	1991	24	1992	30		(Cui et al., 2015)
12gys-6-10	171	85	2.01	0.12298	0.00293	6.14894	0.14941	0.36268	0.00566	2000	43	1997	21	1995	27		(Cui et al., 2015)
12gys-6-11	278	401	0.69	0.15249	0.00318	4.81406	0.10807	0.22896	0.0037	2374	36	1787	19	1329	19		(Cui et al., 2015)
12gys-6-12	3621	1224	2.96	0.11844	0.0023	2.12471	0.04449	0.13011	0.00197	1933	36	1157	14	788	11		(Cui et al., 2015)
12gys-6-13	367	95	3.84	0.06492	0.00235	1.13857	0.04074	0.1272	0.00224	772	78	772	19	772	13		(Cui et al., 2015)
12gys-6-14	408	352	1.16	0.1642	0.00232	7.37897	0.12641	0.32593	0.00487	2499	24	2158	15	1819	24		(Cui et al., 2015)
12gys-6-15	218	144	1.51	0.0694	0.00243	1.21597	0.04293	0.12706	0.0025	911	74	808	20	771	14		(Cui et al., 2015)
12gys-6-16	233	190	1.22	0.06552	0.00176	1.17916	0.03314	0.13052	0.00234	791	58	791	15	791	13		(Cui et al., 2015)
12gys-6-17	277	194	1.42	0.0662	0.00154	1.20257	0.03004	0.13176	0.00221	813	50	802	14	798	13		(Cui et al., 2015)
12gys-6-18	188	754	0.25	0.12083	0.00334	3.05516	0.07042	0.18339	0.00279	1968	50	1422	18	1085	15		(Cui et al., 2015)
12gys-6-19	69	45	1.54	0.07392	0.00406	1.29327	0.06986	0.1269	0.00295	1039	114	843	31	770	17		(Cui et al., 2015)
12gys-6-20	249	111	2.23	0.06749	0.00343	1.18719	0.05951	0.12757	0.003	853	108	795	28	774	17		(Cui et al., 2015)
12gys-6-21	274	241	1.14	0.06504	0.0021	1.14523	0.03795	0.12766	0.00254	776	70	775	18	775	15		(Cui et al., 2015)
12gys-6-22	485	264	1.84	0.06582	0.00175	1.19936	0.03384	0.13217	0.00232	801	57	800	16	800	13		(Cui et al., 2015)
12gys-6-23	438	2294	0.19	0.08589	0.0045	0.92863	0.04632	0.07842	0.00125	1336	104	667	24	487	7		(Cui et al., 2015)
12gys-6-24	91	39	2.36	0.07736	0.00436	1.49558	0.08304	0.14023	0.00322	1130	115	929	34	846	18		(Cui et al., 2015)
12gys-6-25	166	377	0.44	0.0708	0.00172	1.24494	0.03253	0.12754	0.00228	952	51	821	15	774	13		(Cui et al., 2015)
12gys-6-26	290	341	0.85	0.0657	0.00147	1.18962	0.02914	0.13135	0.00227	797	48	796	14	796	13		(Cui et al., 2015)
12gys-6-27	115	66	1.74	0.13049	0.00252	6.93459	0.14661	0.38547	0.00624	2105	35	2103	19	2102	29		(Cui et al., 2015)
12gys-6-28	216	102	2.12	0.06537	0.00175	1.16338	0.03263	0.1291	0.00221	786	58	784	15	783	13		(Cui et al., 2015)
12gys-6-29	617	359	1.72	0.06535	0.00138	1.16856	0.02728	0.12969	0.00221	786	45	786	13	786	13		(Cui et al., 2015)
12gys-6-30	152	92	1.65	0.06519	0.00235	1.15062	0.04202	0.12803	0.00248	780	78	778	20	777	14		(Cui et al., 2015)
12gys-6-31	312	114	2.73	0.1303	0.00755	6.8815	0.39053	0.38333	0.01004	2102	104	2096	50	2092	47		(Cui et al., 2015)
12gys-6-32	583	1285	0.45	0.13735	0.00699	3.34975	0.16044	0.17688	0.00305	2194	91	1493	37	1050	17		(Cui et al., 2015)
12gys-6-33	1043	423	2.47	0.06479	0.00171	1.12872	0.0316	0.12637	0.00228	768	57	767	15	767	13		(Cui et al., 2015)
12gys-6-34	292	282	1.04	0.13006	0.00445	6.88916	0.24307	0.38422	0.0076	2099	62	2097	31	2096	35		(Cui et al., 2015)
12gys-6-35	1201	1292	0.93	0.14684	0.00265	4.35662	0.0884	0.2152	0.00336	2309	32	1704	17	1256	18		(Cui et al., 2015)
12gys-6-36	286	133	2.14	0.0657	0.0024	1.19305	0.0435	0.13172	0.00248	797	78	797	20	798	14		(Cui et al., 2015)
12gys-6-37	246	144	1.7	0.13076	0.00221	6.96679	0.13296	0.38646	0.00595	2108	30	2107	17	2106	28		(Cui et al., 2015)
12gys-6-38	4354	1970	2.21	0.10253	0.00179	1.41468	0.02861	0.10008	0.00163	1670	33	895	12	615	10		(Cui et al., 2015)
12gys-6-39	758	206	3.68	0.06557	0.00171	1.18388	0.03166	0.13098	0.00212	793	56	793	15	793	12		(Cui et al., 2015)
12gys-6-40	116	90	1.29	0.15887	0.00361	10.1055	0.23836	0.46143	0.00756	2444	39	2444	22	2446	33		(Cui et al., 2015)
12gys-6-41	183	100	1.84	0.06741	0.00159	1.31166	0.03264	0.14113	0.00227	850	50	851	14	851	13		(Cui et al., 2015)
12gys-6-42	236	76	3.12	0.06715	0.00216	1.28949	0.04195	0.13927	0.00241	842	69	841	19	841	14		(Cui et al., 2015)
12gys-6-43	1290	1254	1.03	0.14694	0.00229	3.63466	0.06614	0.17941	0.00271	2311	27	1557	14	1064	15		(Cui et al., 2015)
12gys-6-44	224	126	1.77	0.06518	0.00163	1.1541	0.03012	0.12841	0.00215	780	54	779	14	779	12		(Cui et al., 2015)
12gys-6-45	98	50	1.97	0.16651	0.00591	10.9814	0.38143	0.47863	0.00961	2523	61	2522	32	2521	42		(Cui et al., 2015)
12gys-6-46	110	70	1.57	0.12802	0.00721	6.68058	0.35984	0.37881	0.00965	2071	102	2070	48	2071	45		(Cui et al., 2015)
12gys-6-47	203	158	1.28	0.06742	0.00196	1.31124	0.0388	0.14107	0.00243	851	62	851	17	851	14		(Cui et al., 2015)
12gys-6-48	204	145	1.4	0.06691	0.00245	1.27192	0.04645	0.13788	0.00264	835	78	833	21	833	15		(Cui et al., 2015)
12gys-6-49	79	61	1.29	0.16105	0.00258	10.351	0.16196	0.46613	0.00699	2467	28	2467	14	2467	31		(Cui et al., 2015)
12gys-6-50	220	101	2.17	0.06479	0.00183	1.12551	0.03081	0.12599	0.00196	768	61	766	15	765	11		(Cui et al., 2015)
12gys-6-51	102	158	0.64	0.15247	0.00185	9.34811	0.11468	0.44465	0.00607	2374	21	2373	11	2371	27		(Cui et al., 2015)
12gys-6-52	291	302	0.96	0.06395	0.00115	1.07074	0.01909	0.12141	0.00179	740	39	739	9	739	10		(Cui et al., 2015)
12gys-6-53	223	323	0.69	0.15239	0.00247	5.10302	0.08198	0.24317	0.00329	2373	28	1837	14	1403	17		(Cui et al., 2015)
12gys-6-54	93	66	1.41	0.06486	0.00317	1.13433	0.05363	0.12699	0.00255	770	106	770	26	771	15		(Cui et al., 2015)
12gys-6-55	823	144	5.73	0.06512	0.00253	1.15285	0.04328	0.12831	0.0025	778	84	779	20	778	14		(Cui et al., 2015)
12gys-6-56	493	618	0.8	0.16136	0.00241	2.4254	0.03656	0.10901	0.00159	2470	26	1250	11	667	9		(Cui et al., 2015)
12gys-6-57	226	299	0.76	0.1526	0.00219	6.90629	0.10132	0.3283	0.00465	2375	25	2099	13	1830	23		(Cui et al., 2015)
12gys-6-58	44	46	0.96	0.15434	0.00317	9.56403	0.19346	0.44949	0.00752	2395	36	2394	19	2393	33		(Cui et al., 2015)
12gys-6-59	78	48	1.6	0.06387	0.00285	1.06562	0.04637	0.12103	0.00231	737	97	737	23	736	13		(Cui et al., 2015)
12gys-6-60	45	24	1.87	0.1241	0.00337	6.2726	0.16693	0.3667	0.00628	2016	49	2015	23	2014	30		(Cui et al., 2015)
12gys-6-61	96	84	1.14	0.12034	0.00617	5.89132	0.29025	0.35547	0.00864	1961	94	1960	43	1961	41		(Cui et al., 2015)
12gys-6-62	554	184	3.01	0.06425	0.00338	1.0955	0.05613	0.12367	0.00247	750	114	751	27	752	14		(Cui et al., 2015)
12gys-6-63	88	73	1.21	0.06516	0.00444	1.14989	0.0773	0.12801	0.00256	780	148	777	37	777	15		(Cui et al., 2015)
12gys-6-64	103	58	1.78	0.0634	0.00723	1.03845	0.11626	0.11888	0.00328	722	253	723	58	724	19		(Cui et al., 2015)
12gys-6-65	160	71	2.24	0.06526	0.00692	1.15793	0.11992	0.12885	0.00373	783	233	781	56	781	21		(Cui et al., 2015)
12gys-6-66	225	139	1.63	0.06592	0.00369	1.20726	0.06589	0.13289	0.0027	804	120	804	30	804	15		(Cui et al., 2015)
12gys-6-67	562	149	3.78	0.07713	0.00323	1.29797	0.05322	0.12208	0.00227	1125	86	845	24	743	13		(Cui et al., 2015)
12gys-6-68	78	40	1.93	0.06498	0.0087	1.14005	0.15038	0.12734	0.00373	774	298	773	71	773	21		(Cui et al., 2015)
12gys-6-69	123	93	1.31	0.06539	0.00558	1.1697	0.09751	0.12974	0.00346	787	186	787	46	786	20		(Cui et al., 2015)
12gys-6-70	261	139	1.88	0.06497	0.00304	1.14833	0.05297	0.12821	0.00238	773	101	776	25	778	14		(Cui et al., 2015)
12gys-7 (Cryogenian Xiuning Formation), 29°56′45.8″, 118°05′39.8″
12gys-7-1	1152	95	12.15	0.76641	0.01128	81.186	1.18551	0.76818	0.01233	4861	22	4477	15	3674	45		(Cui et al., 2015)
12gys-7-2	335	91	3.69	0.0638	0.00397	1.06763	0.06343	0.12127	0.00305	735	136	738	31	738	18		(Cui et al., 2015)
12gys-7-3	1119	291	3.85	0.06495	0.00124	1.14123	0.02139	0.1274	0.00197	773	41	773	10	773	11		(Cui et al., 2015)
12gys-7-4	105	88	1.19	0.06494	0.00182	1.13519	0.0308	0.12676	0.00202	772	60	770	15	769	12		(Cui et al., 2015)
12gys-7-5	192	124	1.55	0.06411	0.00197	1.08192	0.03209	0.12238	0.00215	745	66	745	16	744	12		(Cui et al., 2015)
12gys-7-6	160	78	2.06	0.06451	0.00221	1.11015	0.03684	0.1248	0.00216	758	74	758	18	758	12		(Cui et al., 2015)
12gys-7-7	691	281	2.46	0.06837	0.0013	1.04339	0.01928	0.11069	0.00164	880	40	726	10	677	10		(Cui et al., 2015)
12gys-7-8	800	263	3.05	0.06406	0.0014	1.0749	0.02281	0.12167	0.00192	744	47	741	11	740	11		(Cui et al., 2015)
12gys-7-9	458	221	2.07	0.06376	0.00203	1.05818	0.03229	0.12032	0.00214	734	69	733	16	732	12		(Cui et al., 2015)
12gys-7-10	291	137	2.13	0.06387	0.00202	1.06869	0.03241	0.12135	0.00209	737	69	738	16	738	12		(Cui et al., 2015)
12gys-7-11	97	67	1.45	0.06429	0.00317	1.09386	0.05179	0.12341	0.00264	751	107	750	25	750	15		(Cui et al., 2015)
12gys-7-12	232	224	1.03	0.12148	0.002	6.01169	0.09629	0.359	0.00513	1978	30	1978	14	1977	24		(Cui et al., 2015)
12gys-7-13	97	74	1.32	0.06776	0.00169	1.20439	0.02911	0.12898	0.00192	861	53	803	13	782	11		(Cui et al., 2015)
12gys-7-14	185	99	1.87	0.06478	0.00242	1.12615	0.04046	0.12608	0.00236	767	81	766	19	765	14		(Cui et al., 2015)
12gys-7-15	153	76	2.02	0.06517	0.0017	1.15512	0.02934	0.12861	0.00203	780	56	780	14	780	12		(Cui et al., 2015)
12gys-7-16	105	90	1.17	0.06414	0.00239	1.08658	0.03913	0.1229	0.00235	746	81	747	19	747	13		(Cui et al., 2015)
12gys-7-17	96	76	1.27	0.06483	0.00364	1.13011	0.06078	0.12648	0.00305	769	121	768	29	768	17		(Cui et al., 2015)
12gys-7-18	156	214	0.73	0.16352	0.00245	10.6295	0.1575	0.4718	0.00636	2492	26	2491	14	2491	28		(Cui et al., 2015)
12gys-7-19	137	62	2.2	0.06733	0.00242	1.20285	0.04189	0.12961	0.00237	848	77	802	19	786	14		(Cui et al., 2015)
12gys-7-20	69	144	0.48	0.12294	0.00163	6.16433	0.08315	0.36384	0.00522	1999	24	1999	12	2000	25		(Cui et al., 2015)
12gys-7-21	226	160	1.41	0.06475	0.00125	1.12368	0.02153	0.12593	0.00186	766	42	765	10	765	11		(Cui et al., 2015)
12gys-7-22	55	51	1.07	0.06446	0.00587	1.09421	0.0944	0.12337	0.0042	757	199	751	46	750	24		(Cui et al., 2015)
12gys-7-23	298	139	2.14	0.0646	0.00183	1.11491	0.03071	0.12522	0.002	761	61	761	15	761	11		(Cui et al., 2015)
12gys-7-24	268	141	1.9	0.06442	0.00169	1.10313	0.02822	0.12421	0.00212	755	57	755	14	755	12		(Cui et al., 2015)
12gys-7-25	152	90	1.69	0.0745	0.00308	1.13244	0.04469	0.11027	0.00203	1055	85	769	21	674	12		(Cui et al., 2015)
12gys-7-26	210	107	1.97	0.07153	0.03646	1.18945	0.60331	0.1206	0.00608	973	1101	796	280	734	35		(Cui et al., 2015)
12gys-7-27	180	108	1.67	0.06395	0.00189	1.07075	0.03054	0.12145	0.00215	740	64	739	15	739	12		(Cui et al., 2015)
12gys-7-28	254	115	2.21	0.07055	0.00342	1.14518	0.05278	0.11778	0.00264	944	102	775	25	718	15		(Cui et al., 2015)
12gys-7-29	278	910	0.31	0.15361	0.00169	5.5732	0.06291	0.26321	0.00365	2387	19	1912	10	1506	19		(Cui et al., 2015)
12gys-7-30	430	213	2.02	0.06395	0.00276	1.0712	0.04367	0.1215	0.00238	740	94	739	21	739	14		(Cui et al., 2015)
12gys-7-31	71	54	1.31	0.06436	0.00216	1.09968	0.03579	0.12397	0.00203	753	73	753	17	753	12		(Cui et al., 2015)
12gys-7-32	177	94	1.88	0.07014	0.00206	1.15364	0.03258	0.11934	0.002	932	62	779	15	727	12		(Cui et al., 2015)
12gys-7-33	141	85	1.65	0.06847	0.00294	1.1738	0.04808	0.12447	0.00253	883	91	788	22	756	15		(Cui et al., 2015)
12gys-7-34	629	142	4.42	0.06404	0.00157	1.07964	0.02554	0.12228	0.00198	743	53	743	12	744	11		(Cui et al., 2015)
12gys-7-35	124	85	1.46	0.06471	0.0018	1.12511	0.03017	0.12611	0.00206	765	60	765	14	766	12		(Cui et al., 2015)
12gys-7-36	645	164	3.93	0.06413	0.00153	1.08119	0.02459	0.12231	0.00179	746	52	744	12	744	10		(Cui et al., 2015)
12gys-7-37	150	92	1.63	0.06373	0.00273	1.05384	0.04345	0.11999	0.00244	733	93	731	21	731	14		(Cui et al., 2015)
12gys-7-38	215	144	1.49	0.06379	0.00119	1.05951	0.01947	0.12048	0.00174	735	40	734	10	733	10		(Cui et al., 2015)
12gys-7-39	149	114	1.31	0.06399	0.00154	1.0743	0.02522	0.1218	0.00193	741	52	741	12	741	11		(Cui et al., 2015)
12gys-7-40	607	457	1.33	0.15591	0.00174	6.56775	0.07513	0.30555	0.00408	2412	19	2055	10	1719	20		(Cui et al., 2015)
12gys-7-41	116	60	1.93	0.06489	0.00212	1.13533	0.03591	0.12692	0.00207	771	70	770	17	770	12		(Cui et al., 2015)
12gys-7-42	144	118	1.22	0.0644	0.00145	1.10098	0.02423	0.12402	0.00192	755	49	754	12	754	11		(Cui et al., 2015)
12gys-7-43	323	143	2.27	0.0643	0.00126	1.09569	0.02114	0.12361	0.00183	752	42	751	10	751	10		(Cui et al., 2015)
12gys-7-44	108	63	1.71	0.08377	0.00358	1.17259	0.04778	0.1015	0.00195	1287	85	788	22	623	11		(Cui et al., 2015)
12gys-7-45	400	242	1.65	0.06501	0.00176	1.14377	0.02999	0.1277	0.00226	775	58	774	14	775	13		(Cui et al., 2015)
12gys-7-46	115	87	1.32	0.06466	0.00184	1.12134	0.03103	0.12581	0.00204	763	61	764	15	764	12		(Cui et al., 2015)
12gys-7-47	157	101	1.55	0.0653	0.00165	1.17006	0.02879	0.12999	0.00208	784	54	787	13	788	12		(Cui et al., 2015)
12gys-7-48	39	37	1.03	0.06462	0.00466	1.1072	0.07673	0.12434	0.00338	762	157	757	37	755	19		(Cui et al., 2015)
12gys-7-49	96	59	1.64	0.06492	0.00216	1.13287	0.0366	0.12657	0.00205	772	72	769	17	768	12		(Cui et al., 2015)
12gys-7-50	304	208	1.46	0.06462	0.00105	1.11707	0.01797	0.12539	0.00175	762	35	762	9	762	10		(Cui et al., 2015)
12gys-7-51	46	40	1.15	0.06369	0.00245	1.05464	0.03945	0.1201	0.00202	731	83	731	19	731	12		(Cui et al., 2015)
12gys-7-52	584	390	1.5	0.15836	0.00172	7.94125	0.08913	0.36373	0.00506	2438	19	2224	10	2000	24		(Cui et al., 2015)
12gys-7-53	169	132	1.28	0.07852	0.00154	1.51408	0.02895	0.13988	0.00214	1160	40	936	12	844	12		(Cui et al., 2015)
12gys-7-54	346	398	0.87	0.14148	0.00167	4.79267	0.05777	0.2457	0.00342	2245	21	1784	10	1416	18		(Cui et al., 2015)
12gys-7-55	202	272	0.74	0.15841	0.00195	7.83002	0.09769	0.3585	0.00507	2439	21	2212	11	1975	24		(Cui et al., 2015)
12gys-7-56	22	35	0.64	0.15848	0.00503	10.0155	0.30066	0.45855	0.00954	2440	55	2436	28	2433	42		(Cui et al., 2015)
12gys-7-57	116	73	1.58	0.06401	0.00175	1.07751	0.02873	0.12208	0.0019	742	59	742	14	743	11		(Cui et al., 2015)
12gys-7-58	560	330	1.7	0.06439	0.00103	1.10041	0.01746	0.12393	0.00175	754	35	754	8	753	10		(Cui et al., 2015)
12gys-7-59	132	69	1.91	0.06441	0.00172	1.1	0.02861	0.12386	0.00193	755	58	753	14	753	11		(Cui et al., 2015)
12gys-7-60	845	258	3.28	0.06612	0.00156	1.21965	0.028	0.13381	0.00221	810	51	810	13	810	13		(Cui et al., 2015)
12gys-7-61	311	119	2.61	0.06533	0.00489	1.1643	0.0848	0.12917	0.00322	785	162	784	40	783	18		(Cui et al., 2015)
12gys-7-62	185	120	1.54	0.06613	0.00392	1.21762	0.07045	0.1335	0.00284	810	127	809	32	808	16		(Cui et al., 2015)
12gys-7-63	523	159	3.3	0.06478	0.00544	1.09977	0.08959	0.12314	0.00331	767	183	753	43	749	19		(Cui et al., 2015)
12gys-7-64	94	53	1.78	0.06535	0.00704	1.15097	0.12187	0.12778	0.00334	786	236	778	58	775	19		(Cui et al., 2015)
12gys-7-65	51	36	1.42	0.06464	0.01011	1.1219	0.17307	0.12581	0.00395	763	351	764	83	764	23		(Cui et al., 2015)
12gys-7-66	94	68	1.38	0.06514	0.00549	1.15373	0.09544	0.12852	0.00296	779	183	779	45	779	17		(Cui et al., 2015)
12gys-7-67	82	62	1.31	0.06516	0.00658	1.14551	0.11349	0.12743	0.00332	780	221	775	54	773	19		(Cui et al., 2015)
12gys-7-68	148	69	2.15	0.06551	0.00539	1.17696	0.095	0.1303	0.00297	791	179	790	44	790	17		(Cui et al., 2015)
12gys-7-69	111	80	1.38	0.07613	0.00513	1.16224	0.07661	0.11074	0.00234	1098	139	783	36	677	14		(Cui et al., 2015)
12gys-7-70	164	72	2.29	0.06556	0.00497	1.18133	0.0877	0.13071	0.00281	792	164	792	41	792	16		(Cui et al., 2015)
HS02 (Cryogenian Xiuning Formation)
HS02-1	40	34	1.19	0.14888	0.00565	8.9769	0.32068	0.4373	0.00977	2333	67	2336	33	2339	44		(Cui et al., 2015)
HS02-2	79	72	1.1	0.06609	0.00245	1.21648	0.04338	0.1335	0.00241	809	79	808	20	808	14		(Cui et al., 2015)
HS02-3	76	136	0.56	0.16388	0.00302	10.6969	0.19321	0.47341	0.00734	2496	32	2497	17	2498	32		(Cui et al., 2015)
HS02-4	621	621	1	0.06462	0.001	1.11788	0.01728	0.12547	0.0018	762	33	762	8	762	10		(Cui et al., 2015)
HS02-5	305	191	1.6	0.0658	0.00279	1.19913	0.04848	0.13217	0.00274	800	91	800	22	800	16		(Cui et al., 2015)
HS02-6	183	97	1.89	0.06622	0.00218	1.22458	0.03883	0.13414	0.00246	813	70	812	18	811	14		(Cui et al., 2015)
HS02-7	36	37	0.97	0.1256	0.00443	6.42221	0.21483	0.37077	0.0076	2037	64	2035	29	2033	36		(Cui et al., 2015)
HS02-8	117	23	5.05	0.1154	0.00298	6.2403	0.15468	0.3922	0.007	1886	48	2010	22	2133	32		(Cui et al., 2015)
HS02-9	326	137	2.39	0.12595	0.0023	6.47044	0.11639	0.37259	0.0058	2042	33	2042	16	2042	27		(Cui et al., 2015)
HS02-10	187	86	2.18	0.12733	0.00274	6.61314	0.13845	0.37667	0.00608	2061	39	2061	18	2061	28		(Cui et al., 2015)
HS02-11	47	35	1.34	0.12268	0.00352	6.14169	0.16793	0.36313	0.00694	1996	52	1996	24	1997	33		(Cui et al., 2015)
HS02-12	560	508	1.1	0.06495	0.0014	1.14594	0.02429	0.12797	0.00201	773	46	775	11	776	11		(Cui et al., 2015)
HS02-13	152	160	0.95	0.0663	0.00161	1.22969	0.02883	0.13454	0.0022	816	52	814	13	814	13		(Cui et al., 2015)
HS02-14	110	142	0.77	0.06362	0.00348	1.04349	0.05421	0.11898	0.00292	729	119	726	27	725	17		(Cui et al., 2015)
HS02-15	41	39	1.03	0.12064	0.00253	5.92023	0.11923	0.35595	0.00594	1966	38	1964	17	1963	28		(Cui et al., 2015)
HS02-16	194	282	0.69	0.17211	0.00315	8.21518	0.1473	0.34626	0.00558	2578	31	2255	16	1917	27		(Cui et al., 2015)
HS02-17	185	86	2.15	0.12033	0.004	5.90469	0.18643	0.35606	0.00721	1961	61	1962	27	1963	34		(Cui et al., 2015)
HS02-18	87	59	1.46	0.06575	0.00318	1.2008	0.05577	0.13248	0.00284	798	104	801	26	802	16		(Cui et al., 2015)
HS02-19	751	719	1.04	0.06395	0.00214	1.06884	0.03429	0.12126	0.00234	740	72	738	17	738	13		(Cui et al., 2015)
HS02-20	570	381	1.5	0.06476	0.0018	1.11768	0.03001	0.12518	0.00221	767	60	762	14	760	13		(Cui et al., 2015)
HS02-21	562	307	1.83	0.06513	0.00152	1.14684	0.02609	0.12773	0.0021	779	50	776	12	775	12		(Cui et al., 2015)
HS02-22	355	603	0.59	0.1804	0.00439	5.5593	0.13204	0.22362	0.00377	2657	41	1910	20	1301	20		(Cui et al., 2015)
HS02-23	47	168	0.28	0.06689	0.00186	1.26867	0.03397	0.13761	0.00241	834	59	832	15	831	14		(Cui et al., 2015)
HS02-24	21	27	0.79	0.16048	0.00711	10.2758	0.42929	0.46449	0.0108	2461	77	2460	39	2459	48		(Cui et al., 2015)
HS02-25	188	91	2.06	0.0662	0.00197	1.22308	0.03509	0.13401	0.0023	813	64	811	16	811	13		(Cui et al., 2015)
HS02-26	346	132	2.63	0.06579	0.00394	1.19835	0.06793	0.13215	0.00352	800	129	800	31	800	20		(Cui et al., 2015)
HS02-27	68	76	0.9	0.15504	0.00234	9.66075	0.14448	0.45199	0.00684	2402	26	2403	14	2404	30		(Cui et al., 2015)
HS02-28	241	92	2.62	0.06671	0.00294	1.2612	0.05304	0.13709	0.00298	829	94	828	24	828	17		(Cui et al., 2015)
HS02-29	56	45	1.26	0.12247	0.00264	6.11653	0.12679	0.36229	0.00596	1993	39	1993	18	1993	28		(Cui et al., 2015)
HS02-30	223	251	0.89	0.06715	0.00248	1.29103	0.0455	0.13942	0.00255	842	79	842	20	841	14		(Cui et al., 2015)
HS02-31	71	49	1.44	0.06673	0.00344	1.26638	0.06255	0.13765	0.00308	829	110	831	28	831	17		(Cui et al., 2015)
HS02-32	215	115	1.87	0.11753	0.00305	5.60129	0.13973	0.34563	0.00634	1919	48	1916	21	1914	30		(Cui et al., 2015)
HS02-33	10	115	0.09	0.12722	0.00674	6.58401	0.32534	0.37521	0.00878	2060	96	2057	44	2054	41		(Cui et al., 2015)
HS02-34	169	462	0.37	0.15031	0.00226	6.26889	0.09403	0.30251	0.00442	2349	26	2014	13	1704	22		(Cui et al., 2015)
HS02-35	203	206	0.98	0.16246	0.00287	10.511	0.18323	0.4693	0.00706	2481	30	2481	16	2480	31		(Cui et al., 2015)
HS02-36	133	166	0.8	0.15428	0.00372	9.56127	0.22418	0.4495	0.00784	2394	42	2393	22	2393	35		(Cui et al., 2015)
HS02-37	234	112	2.1	0.06401	0.00302	1.0785	0.04998	0.12224	0.00223	742	102	743	24	743	13		(Cui et al., 2015)
HS02-38	179	83	2.16	0.06662	0.00506	1.26083	0.09308	0.13734	0.00333	826	164	828	42	830	19		(Cui et al., 2015)
HS02-39	184	73	2.5	0.06557	0.00579	1.18642	0.10195	0.13127	0.00347	793	192	794	47	795	20		(Cui et al., 2015)
HS02-40	69	23	3.02	0.11769	0.01461	1.60155	0.19359	0.09874	0.0033	1921	233	971	76	607	19		(Cui et al., 2015)
HS02-41	223	105	2.13	0.06619	0.00633	1.22752	0.11331	0.13464	0.00416	812	208	813	52	814	24		(Cui et al., 2015)
HS02-42	98	46	2.12	0.06574	0.00976	1.19875	0.17389	0.13233	0.00493	798	330	800	80	801	28		(Cui et al., 2015)
HS02-43	447	214	2.08	0.06556	0.00199	1.17881	0.03501	0.13046	0.00212	792	65	791	16	790	12		(Cui et al., 2015)
HS02-44	139	82	1.69	0.06454	0.00372	1.10683	0.0625	0.12446	0.00236	759	125	757	30	756	14		(Cui et al., 2015)
HS02-45	50	20	2.57	0.08371	0.01208	1.52322	0.21619	0.13203	0.00413	1286	299	940	87	799	24		(Cui et al., 2015)
HS02-46	193	88	2.19	0.06498	0.00351	1.13823	0.06013	0.1271	0.00237	774	117	772	29	771	14		(Cui et al., 2015)
HS02-47	219	250	0.88	0.12244	0.00438	6.09126	0.20718	0.36087	0.0069	1992	65	1989	30	1986	33		(Cui et al., 2015)
HS02-48	146	48	3.01	0.06494	0.006	1.15118	0.10364	0.1286	0.00309	772	202	778	49	780	18		(Cui et al., 2015)
HS02-49	26	14	1.94	0.06531	0.0149	1.15132	0.26032	0.12793	0.00455	784	484	778	123	776	26		(Cui et al., 2015)
HS02-50	36	22	1.6	0.11782	0.00765	5.63664	0.35039	0.34708	0.00973	1923	120	1922	54	1921	47		(Cui et al., 2015)
HS02-51	29	14	2	0.12619	0.01372	2.43614	0.25707	0.14006	0.00443	2046	200	1253	76	845	25		(Cui et al., 2015)
HS02-52	196	72	2.73	0.06523	0.00389	1.16878	0.06843	0.12999	0.00256	782	129	786	32	788	15		(Cui et al., 2015)
HS02-53	35	30	1.16	0.06536	0.00842	1.17141	0.14881	0.13004	0.00364	786	285	787	70	788	21		(Cui et al., 2015)
HS02-54	55	48	1.15	0.06464	0.00685	1.1026	0.11461	0.12375	0.00336	763	233	755	55	752	19		(Cui et al., 2015)
HS02-55	239	270	0.89	0.16298	0.00368	9.39469	0.21167	0.41825	0.00652	2487	39	2377	21	2253	30		(Cui et al., 2015)
HS02-56	30	15	2.03	0.06396	0.01753	1.06451	0.28866	0.12079	0.00544	740	553	736	142	735	31		(Cui et al., 2015)
HS02-57	83	30	2.78	0.0656	0.009	1.19504	0.16143	0.13216	0.00401	794	305	798	75	800	23		(Cui et al., 2015)
HS02-58	134	62	2.16	0.06591	0.00427	1.21289	0.07707	0.13349	0.00275	804	140	807	35	808	16		(Cui et al., 2015)
HS02-59	105	47	2.25	0.06593	0.005	1.21141	0.09051	0.13331	0.00278	804	164	806	42	807	16		(Cui et al., 2015)
HS02-60	146	43	3.4	0.0648	0.00693	1.14268	0.12009	0.12793	0.00343	768	235	774	57	776	20		(Cui et al., 2015)
12gys-8-1 (Cryogenian Leigongwu Formation), 29°55′40.7″, 118°05′52.9″
12gys-8-1	472	236	2	0.11133	0.00313	5.02115	0.13617	0.32685	0.00633	1821	52	1823	23	1823	31		(Cui et al., 2015)
12gys-8-2	134	110	1.22	0.16553	0.00428	10.8775	0.27155	0.47629	0.00916	2513	44	2513	23	2511	40		(Cui et al., 2015)
12gys-8-3	99	58	1.72	0.06581	0.00581	1.19758	0.10092	0.13198	0.00432	800	192	799	47	799	25		(Cui et al., 2015)
12gys-8-4	262	125	2.09	0.06516	0.00228	1.15979	0.03918	0.12907	0.0025	780	75	782	18	783	14		(Cui et al., 2015)
12gys-8-5	204	67	3.05	0.12274	0.00206	6.13339	0.10139	0.36245	0.00575	1996	31	1995	14	1994	27		(Cui et al., 2015)
12gys-8-6	191	195	0.98	0.06649	0.00134	1.24288	0.02466	0.13561	0.00215	822	43	820	11	820	12		(Cui et al., 2015)
12gys-8-7	96	58	1.66	0.11763	0.00282	5.62705	0.13054	0.34704	0.00626	1921	44	1920	20	1920	30		(Cui et al., 2015)
12gys-8-8	243	102	2.38	0.11934	0.00246	5.7992	0.11741	0.35261	0.00598	1946	38	1946	18	1947	29		(Cui et al., 2015)
12gys-8-9	340	183	1.86	0.06545	0.00126	1.173	0.02216	0.13001	0.0019	789	41	788	10	788	11		(Cui et al., 2015)
12gys-8-10	160	101	1.58	0.15517	0.00356	9.66123	0.21767	0.45186	0.00796	2404	40	2403	21	2404	35		(Cui et al., 2015)
12gys-8-11	90	58	1.55	0.12518	0.003	6.39392	0.149	0.37073	0.00655	2031	43	2031	20	2033	31		(Cui et al., 2015)
12gys-8-12	140	227	0.62	0.15912	0.00372	10.1093	0.23068	0.46079	0.00699	2446	40	2445	21	2443	31		(Cui et al., 2015)
12gys-8-13	7079	2558	2.77	0.13305	0.00145	0.80983	0.00915	0.04417	0.00063	2139	19	602	5	279	4		(Cui et al., 2015)
12gys-8-14	170	106	1.59	0.06567	0.00396	1.18323	0.06566	0.13038	0.00394	796	130	793	31	790	22		(Cui et al., 2015)
12gys-8-15	360	273	1.32	0.06466	0.00153	1.12343	0.02583	0.12615	0.00205	763	51	765	12	766	12		(Cui et al., 2015)
12gys-8-16	90	91	0.99	0.16088	0.00237	10.3137	0.15147	0.46517	0.00695	2465	25	2463	14	2462	31		(Cui et al., 2015)
12gys-8-17	321	250	1.28	0.12078	0.0014	5.94427	0.07103	0.35705	0.0051	1968	21	1968	10	1968	24		(Cui et al., 2015)
12gys-8-18	276	125	2.2	0.06496	0.00355	1.13705	0.05918	0.12694	0.00316	773	118	771	28	770	18		(Cui et al., 2015)
12gys-8-19	645	243	2.65	0.12005	0.00182	5.87239	0.09018	0.35496	0.00553	1957	28	1957	13	1958	26		(Cui et al., 2015)
12gys-8-20	757	559	1.36	0.06522	0.00104	1.15881	0.01867	0.12893	0.00197	781	34	781	9	782	11		(Cui et al., 2015)
12gys-8-21	124	71	1.76	0.12498	0.00288	6.3742	0.14278	0.3702	0.00652	2029	42	2029	20	2030	31		(Cui et al., 2015)
12gys-8-22	65	93	0.69	0.22729	0.00379	18.8211	0.31236	0.60085	0.00929	3033	27	3033	16	3033	37		(Cui et al., 2015)
12gys-8-23	139	170	0.82	0.15777	0.00438	9.96019	0.26805	0.45811	0.00746	2432	48	2431	25	2431	33		(Cui et al., 2015)
12gys-8-24	3524	963	3.66	0.27711	0.00422	4.49453	0.06897	0.11766	0.00174	3347	24	1730	13	717	10		(Cui et al., 2015)
12gys-8-25	2261	878	2.58	0.12221	0.00166	2.0069	0.02738	0.11911	0.00172	1989	25	1118	9	725	10		(Cui et al., 2015)
12gys-8-26	829	303	2.73	0.06617	0.00187	1.22681	0.03349	0.13447	0.00259	812	60	813	15	813	15		(Cui et al., 2015)
12gys-8-27	979	318	3.08	0.12144	0.00152	5.37047	0.0693	0.32077	0.00482	1977	23	1880	11	1793	24		(Cui et al., 2015)
12gys-8-28	286	266	1.07	0.11081	0.0019	4.95265	0.08452	0.32419	0.00539	1813	32	1811	14	1810	26		(Cui et al., 2015)
12gys-8-29	423	100	4.25	0.07404	0.00298	1.43803	0.05525	0.14083	0.00306	1043	83	905	23	849	17		(Cui et al., 2015)
12gys-8-30	1984	1029	1.93	0.11241	0.00166	1.95871	0.02895	0.12638	0.00185	1839	27	1101	10	767	11		(Cui et al., 2015)
12gys-8-31	440	292	1.51	0.21439	0.00282	10.3131	0.13784	0.34893	0.00515	2939	22	2463	12	1929	25		(Cui et al., 2015)
12gys-8-32	498	604	0.82	0.12604	0.00228	6.4749	0.11468	0.37258	0.00552	2043	33	2042	16	2042	26		(Cui et al., 2015)
12gys-8-33	139	144	0.97	0.06765	0.00187	1.32419	0.03546	0.14202	0.00248	858	59	856	15	856	14		(Cui et al., 2015)
12gys-8-34	394	243	1.62	0.06508	0.0016	1.14906	0.02744	0.12812	0.00222	777	53	777	13	777	13		(Cui et al., 2015)
12gys-8-35	89	52	1.73	0.07763	0.00426	1.45898	0.07634	0.1363	0.00343	1137	112	914	32	824	19		(Cui et al., 2015)
12gys-8-36	224	171	1.31	0.06418	0.00157	1.08948	0.02595	0.12313	0.00203	748	53	748	13	749	12		(Cui et al., 2015)
12gys-8-37	263	121	2.17	0.06507	0.0017	1.12967	0.0287	0.12592	0.002	777	56	768	14	765	11		(Cui et al., 2015)
12gys-8-38	230	108	2.13	0.12412	0.00162	6.27687	0.08275	0.36681	0.00529	2016	24	2015	12	2014	25		(Cui et al., 2015)
12gys-8-39	137	69	2	0.14863	0.00394	8.92183	0.2258	0.43534	0.00877	2330	46	2330	23	2330	39		(Cui et al., 2015)
12gys-8-40	103	53	1.93	0.06978	0.00206	1.45415	0.04166	0.15114	0.00241	922	62	912	17	907	13		(Cui et al., 2015)
12gys-8-41	4131	1774	2.33	0.13816	0.00176	2.22955	0.0292	0.11705	0.00175	2204	23	1190	9	714	10		(Cui et al., 2015)
12gys-8-42	1170	879	1.33	0.14162	0.00175	4.60529	0.05869	0.23588	0.00346	2247	22	1750	11	1365	18		(Cui et al., 2015)
12gys-8-43	720	512	1.41	0.34476	0.01907	24.3542	1.20448	0.51234	0.01268	3684	87	3283	48	2667	54		(Cui et al., 2015)
12gys-8-44	99	121	0.81	0.06401	0.00266	1.06629	0.0426	0.12082	0.00243	742	90	737	21	735	14		(Cui et al., 2015)
12gys-8-45	79	95	0.83	0.18484	0.00308	13.0014	0.21389	0.51012	0.00749	2697	28	2680	16	2657	32		(Cui et al., 2015)
12gys-8-46	116	44	2.64	0.1205	0.00219	5.6154	0.09981	0.338	0.00516	1964	33	1918	15	1877	25		(Cui et al., 2015)
12gys-8-47	114	59	1.93	0.12028	0.00322	5.7229	0.14722	0.34514	0.00566	1960	49	1935	22	1911	27		(Cui et al., 2015)
12gys-8-48	433	226	1.91	0.14936	0.00223	6.45138	0.09677	0.3133	0.00458	2339	26	2039	13	1757	22		(Cui et al., 2015)
12gys-8-49	169	108	1.57	0.08279	0.00212	1.49101	0.03676	0.13064	0.0023	1264	51	927	15	792	13		(Cui et al., 2015)
12gys-8-50	287	109	2.65	0.07693	0.00213	1.43767	0.03843	0.13553	0.00244	1119	57	905	16	819	14		(Cui et al., 2015)
12gys-8-51	211	98	2.14	0.16139	0.00209	9.38635	0.12308	0.42184	0.00629	2470	22	2376	12	2269	29		(Cui et al., 2015)
12gys-8-52	85	235	0.36	0.16242	0.00227	10.3658	0.14698	0.4629	0.00711	2481	24	2468	13	2452	31		(Cui et al., 2015)
12gys-8-53	2507	925	2.71	0.19444	0.00255	1.91257	0.02534	0.07134	0.00107	2780	22	1085	9	444	6		(Cui et al., 2015)
12gys-8-54	47	22	2.16	0.08364	0.00543	1.36603	0.0851	0.11845	0.00283	1284	130	874	37	722	16		(Cui et al., 2015)
12gys-8-55	218	178	1.23	0.07556	0.00197	1.20356	0.03005	0.11552	0.0018	1083	54	802	14	705	10		(Cui et al., 2015)
12gys-8-56	102	41	2.46	0.13239	0.00264	6.07778	0.11652	0.33296	0.0053	2130	36	1987	17	1853	26		(Cui et al., 2015)
12gys-8-57	32	152	0.21	0.06597	0.00115	1.21023	0.0209	0.13305	0.00196	805	37	805	10	805	11		(Cui et al., 2015)
12gys-8-58	17	13	1.36	0.07408	0.00723	1.26773	0.12069	0.12412	0.0034	1044	205	831	54	754	19		(Cui et al., 2015)
12gys-8-59	33	112	0.29	0.16401	0.00275	10.7068	0.17712	0.47346	0.00727	2497	29	2498	15	2499	32		(Cui et al., 2015)
12gys-8-60	225	189	1.19	0.06488	0.0017	1.13439	0.02863	0.12682	0.002	770	56	770	14	770	11		(Cui et al., 2015)
12gys-8-61	130	47	2.77	0.06554	0.0099	1.19728	0.17709	0.13246	0.0048	792	337	799	82	802	27		(Cui et al., 2015)
12gys-8-62	80	160	0.5	0.15995	0.00367	10.1958	0.23233	0.46243	0.00764	2455	40	2453	21	2450	34		(Cui et al., 2015)
12gys-8-63	194	96	2.01	0.12293	0.0035	6.14341	0.17094	0.36252	0.00633	1999	52	1996	24	1994	30		(Cui et al., 2015)
12gys-8-64	102	51	2	0.12044	0.00436	5.91526	0.20777	0.3562	0.00678	1963	66	1963	31	1964	32		(Cui et al., 2015)
12gys-8-65	88	54	1.63	0.066	0.00856	1.19921	0.15294	0.13187	0.00404	806	286	800	71	799	23		(Cui et al., 2015)
12gys-8-66	221	179	1.23	0.06656	0.00265	1.2539	0.04894	0.13664	0.00239	824	85	825	22	826	14		(Cui et al., 2015)
12gys-8-67	556	208	2.67	0.06718	0.0035	1.30293	0.06612	0.14069	0.00296	843	111	847	29	849	17		(Cui et al., 2015)
12gys-8-68	362	146	2.48	0.06612	0.00322	1.22331	0.05846	0.1342	0.00254	810	105	811	27	812	14		(Cui et al., 2015)
12gys-8-69	106	84	1.26	0.06417	0.00551	1.09026	0.09195	0.12329	0.00299	747	188	749	45	749	17		(Cui et al., 2015)
12gys-8-70	168	77	2.17	0.06342	0.00531	1.03397	0.08512	0.11825	0.00272	722	184	721	42	720	16		(Cui et al., 2015)
12gys-8-71	139	106	1.31	0.07111	0.00415	1.58487	0.09013	0.16167	0.00339	961	123	964	35	966	19		(Cui et al., 2015)
12gys-8-72	55	127	0.43	0.14628	0.00419	8.66908	0.24246	0.42991	0.00749	2303	50	2304	25	2305	34		(Cui et al., 2015)
12gys-8-73	141	79	1.79	0.1231	0.0046	6.18022	0.22343	0.36421	0.00706	2002	68	2002	32	2002	33		(Cui et al., 2015)
12gys-8-74	27	14	1.92	0.06652	0.01954	1.23679	0.36045	0.13486	0.00558	823	600	817	164	816	32		(Cui et al., 2015)
12gys-8-75	84	28	3.06	0.06648	0.01203	1.24982	0.22335	0.1364	0.00471	822	402	823	101	824	27		(Cui et al., 2015)
12gys-8-76	124	80	1.54	0.0672	0.00572	1.29377	0.10747	0.13964	0.00365	844	183	843	48	843	21		(Cui et al., 2015)
12gys-8-77	472	117	4.03	0.06689	0.00442	1.27453	0.08236	0.13822	0.00304	834	142	834	37	835	17		(Cui et al., 2015)
12gys-8-78	148	116	1.28	0.07543	0.00405	1.44056	0.07543	0.13853	0.00281	1080	111	906	31	836	16		(Cui et al., 2015)
12gys-8-79	375	166	2.26	0.066	0.0032	1.2183	0.05768	0.13388	0.00262	806	104	809	26	810	15		(Cui et al., 2015)
12gys-8-80	76	56	1.35	0.16568	0.00685	10.9377	0.43619	0.47904	0.00963	2514	71	2518	37	2523	42		(Cui et al., 2015)
12gys-8-2 (Cryogenian Leigongwu Formation)
12gys-8-2-1	68	68	1.01	0.12234	0.0017	6.10385	0.08398	0.36191	0.00509	1991	25	1991	12	1991	24		(Cui et al., 2015)
12gys-8-2-2	44	36	1.21	0.12292	0.00258	6.15137	0.12348	0.36309	0.00553	1999	38	1998	18	1997	26		(Cui et al., 2015)
12gys-8-2-3	214	218	0.98	0.23245	0.00252	16.3954	0.18428	0.51158	0.00713	3069	18	2900	11	2663	30		(Cui et al., 2015)
12gys-8-2-4	39	39	1.01	0.12373	0.0039	6.22299	0.18637	0.36519	0.00749	2011	57	2008	26	2007	35		(Cui et al., 2015)
12gys-8-2-5	131	70	1.88	0.06565	0.0028	1.18382	0.04845	0.13083	0.00245	795	92	793	23	793	14		(Cui et al., 2015)
12gys-8-2-6	120	60	2.01	0.06608	0.00174	1.21942	0.03131	0.13386	0.00206	809	56	810	14	810	12		(Cui et al., 2015)
12gys-8-2-7	222	317	0.7	0.15364	0.00177	8.55156	0.10187	0.4037	0.00565	2387	20	2291	11	2186	26		(Cui et al., 2015)
12gys-8-2-8	361	387	0.93	0.06763	0.00202	1.31823	0.03808	0.14141	0.00245	857	63	854	17	853	14		(Cui et al., 2015)
12gys-8-2-9	100	103	0.96	0.15756	0.00186	9.95986	0.12051	0.45851	0.00633	2430	20	2431	11	2433	28		(Cui et al., 2015)
12gys-8-2-10	110	68	1.62	0.06901	0.00228	1.42141	0.04548	0.14942	0.00273	899	70	898	19	898	15		(Cui et al., 2015)
12gys-8-2-11	167	106	1.58	0.12132	0.00162	6.00137	0.0813	0.35881	0.00505	1976	24	1976	12	1977	24		(Cui et al., 2015)
12gys-8-2-12	96	146	0.65	0.12171	0.00181	6.03087	0.09055	0.3594	0.00526	1981	27	1980	13	1979	25		(Cui et al., 2015)
12gys-8-2-13	33	28	1.16	0.12344	0.00227	6.21066	0.11097	0.36494	0.00569	2007	33	2006	16	2006	27		(Cui et al., 2015)
12gys-8-2-14	220	120	1.84	0.1545	0.00187	9.58974	0.11827	0.45024	0.00667	2396	21	2396	11	2396	30		(Cui et al., 2015)
12gys-8-2-15	61	40	1.55	0.12554	0.00186	6.42871	0.09373	0.37145	0.00534	2036	27	2036	13	2036	25		(Cui et al., 2015)
12gys-8-2-16	324	210	1.54	0.13279	0.00188	7.19309	0.10097	0.39292	0.00545	2135	25	2136	13	2136	25		(Cui et al., 2015)
12gys-8-2-17	55	60	0.92	0.06129	0.00321	0.89483	0.04527	0.10589	0.00225	649	115	649	24	649	13		(Cui et al., 2015)
12gys-8-2-18	89	94	0.94	0.17506	0.00275	12.1477	0.1861	0.50348	0.00688	2607	27	2616	14	2629	29		(Cui et al., 2015)
12gys-8-2-19	53	155	0.34	0.16038	0.00246	10.2648	0.1573	0.46422	0.00716	2460	27	2459	14	2458	32		(Cui et al., 2015)
12gys-8-2-20	58	58	0.99	0.16138	0.00228	10.3903	0.14613	0.46702	0.00684	2470	24	2470	13	2470	30		(Cui et al., 2015)
12gys-8-2-21	401	207	1.94	0.1254	0.00295	6.41781	0.14625	0.3713	0.00563	2034	43	2035	20	2036	26		(Cui et al., 2015)
12gys-8-2-22	48	36	1.33	0.12358	0.00319	6.23286	0.15409	0.36586	0.00623	2009	47	2009	22	2010	29		(Cui et al., 2015)
12gys-8-2-23	90	88	1.02	0.1233	0.00332	6.19183	0.16051	0.36436	0.0059	2005	49	2003	23	2003	28		(Cui et al., 2015)
12gys-8-2-24	226	356	0.64	0.17456	0.00244	11.9618	0.16866	0.49705	0.00718	2602	24	2601	13	2601	31		(Cui et al., 2015)
12gys-8-2-25	77	45	1.7	0.12145	0.00167	6.00203	0.08179	0.35848	0.00518	1978	25	1976	12	1975	25		(Cui et al., 2015)
12gys-8-2-26	106	64	1.66	0.06431	0.00178	1.09548	0.02962	0.12356	0.00191	752	60	751	14	751	11		(Cui et al., 2015)
12gys-8-2-27	463	189	2.45	0.17901	0.00281	12.5089	0.19596	0.50689	0.00804	2644	27	2643	15	2643	34		(Cui et al., 2015)
12gys-8-2-28	475	571	0.83	0.16566	0.00454	7.60228	0.17868	0.33284	0.00467	2514	47	2185	21	1852	23		(Cui et al., 2015)
12gys-8-2-29	212	192	1.1	0.15336	0.00189	7.6429	0.09536	0.36152	0.0052	2384	21	2190	11	1989	25		(Cui et al., 2015)
12gys-8-2-30	49	40	1.24	0.12224	0.00221	6.07222	0.10637	0.36039	0.00569	1989	33	1986	15	1984	27		(Cui et al., 2015)
12gys-8-2-31	534	334	1.6	0.1566	0.00185	7.27687	0.08738	0.33712	0.00467	2419	21	2146	11	1873	23		(Cui et al., 2015)
12gys-8-2-32	82	110	0.75	0.12289	0.0022	6.14328	0.1076	0.36261	0.00562	1999	33	1996	15	1995	27		(Cui et al., 2015)
12gys-8-2-33	121	68	1.79	0.12383	0.002	6.25637	0.09864	0.36651	0.00533	2012	29	2012	14	2013	25		(Cui et al., 2015)
12gys-8-2-34	625	675	0.93	0.18565	0.00233	10.5686	0.13315	0.41305	0.00574	2704	21	2486	12	2229	26		(Cui et al., 2015)
12gys-8-2-35	247	182	1.36	0.06458	0.00127	1.11103	0.02131	0.12481	0.00183	761	42	759	10	758	10		(Cui et al., 2015)
12gys-8-2-36	362	357	1.01	0.06643	0.00142	1.24232	0.02539	0.13565	0.00196	820	46	820	11	820	11		(Cui et al., 2015)
12gys-8-2-37	162	208	0.78	0.14683	0.00147	8.72027	0.09143	0.43094	0.00598	2309	18	2309	10	2310	27		(Cui et al., 2015)
12gys-8-2-38	114	89	1.28	0.06571	0.00146	1.19208	0.02598	0.13162	0.00206	797	48	797	12	797	12		(Cui et al., 2015)
12gys-8-2-39	29	26	1.12	0.16276	0.00412	10.526	0.25232	0.46939	0.00809	2485	44	2482	22	2481	35		(Cui et al., 2015)
12gys-8-2-40	225	160	1.41	0.06875	0.00124	1.40644	0.02512	0.14841	0.00231	891	38	892	11	892	13		(Cui et al., 2015)
12gys-8-2-41	208	185	1.13	0.0661	0.00181	1.21414	0.03208	0.13327	0.00206	810	59	807	15	806	12		(Cui et al., 2015)
12gys-8-2-42	186	231	0.81	0.15454	0.00189	9.58752	0.12211	0.45009	0.00664	2397	21	2396	12	2396	30		(Cui et al., 2015)
12gys-8-2-43	47	37	1.27	0.12613	0.00324	6.48592	0.16006	0.37306	0.00627	2045	46	2044	22	2044	29		(Cui et al., 2015)
12gys-8-2-44	97	186	0.52	0.1631	0.00301	10.4329	0.18995	0.4641	0.00659	2488	32	2474	17	2458	29		(Cui et al., 2015)
12gys-8-2-45	76	77	0.99	0.15456	0.00275	9.59513	0.16796	0.45042	0.00655	2397	31	2397	16	2397	29		(Cui et al., 2015)
12gys-8-2-46	186	133	1.4	0.15884	0.00483	10.0772	0.29934	0.46003	0.00812	2443	53	2442	27	2440	36		(Cui et al., 2015)
12gys-8-2-47	70	54	1.29	0.12397	0.00288	6.26521	0.14197	0.3666	0.0059	2014	42	2014	20	2013	28		(Cui et al., 2015)
12gys-8-2-48	405	333	1.22	0.15847	0.00219	8.14068	0.11674	0.37264	0.00541	2439	24	2247	13	2042	25		(Cui et al., 2015)
12gys-8-2-49	205	96	2.13	0.06654	0.0015	1.25152	0.02751	0.13642	0.00206	823	48	824	12	824	12		(Cui et al., 2015)
12gys-8-2-50	9	39	0.22	0.13385	0.00237	7.30263	0.12638	0.39576	0.00666	2149	32	2149	15	2149	31		(Cui et al., 2015)
12gys-8-2-51	106	544	0.2	0.1235	0.00119	5.45522	0.05623	0.32044	0.00453	2007	17	1894	9	1792	22		(Cui et al., 2015)
12gys-8-2-52	39	32	1.23	0.12295	0.00275	6.16273	0.13254	0.36357	0.00654	1999	41	1999	19	1999	31		(Cui et al., 2015)
12gys-8-2-53	41	18	2.24	0.06598	0.00402	1.20508	0.07185	0.1325	0.00271	806	131	803	33	802	15		(Cui et al., 2015)
12gys-8-2-54	172	188	0.92	0.06799	0.00098	1.34909	0.01961	0.14395	0.00211	868	31	867	8	867	12		(Cui et al., 2015)
12gys-8-2-55	52	29	1.82	0.06441	0.00307	1.10345	0.0514	0.12429	0.00236	755	103	755	25	755	14		(Cui et al., 2015)
12gys-8-2-56	17	21	0.83	0.06841	0.00335	1.37802	0.06588	0.14614	0.00277	881	104	880	28	879	16		(Cui et al., 2015)
12gys-8-2-57	236	190	1.24	0.15655	0.00247	9.8266	0.15464	0.45531	0.00731	2419	27	2419	15	2419	32		(Cui et al., 2015)
12gys-8-2-58	40	50	0.8	0.15288	0.00292	9.40278	0.17474	0.44618	0.00742	2378	33	2378	17	2378	33		(Cui et al., 2015)
12gys-8-2-59	51	22	2.32	0.13237	0.00383	7.13927	0.1958	0.39128	0.00708	2130	52	2129	24	2129	33		(Cui et al., 2015)
12gys-8-2-60	341	145	2.35	0.06519	0.00127	1.15731	0.02195	0.12879	0.00189	780	42	781	10	781	11		(Cui et al., 2015)
12gys-8-2-61	135	359	0.38	0.16242	0.0015	10.5199	0.10275	0.46947	0.00625	2481	16	2482	9	2481	27		(Cui et al., 2015)
[truncated: 2,118 more rows]

## Sheet: SE Yangtze early Cam
U-Pb ages of detrital zircons from Cambrian siliciclastic rocks from the southeastern margin of the Yangtze Block
[truncated: 380 more rows]

[truncated: 11 more sheets: Northern India early Cambrian, Northern India M-L Cambrian, Tarim Cry to Edia, Tarim Cambrian, W Cathaysia Cryo-Edi, W Cathaysia early Cambrian, Lhasa Late Neoproterozoic, Lhasa Cambrian, N Australia Cryo-Edia, N Australia Cambrian, Sheet1]
